# Supplementary material for: Endurance Exercise Training Alters Lipidomic Profiles of Plasma and Eight Tissues in Rats: a MoTrPAC study
Source: Research Square preprint supplement (doi:10.21203/rs.3.rs-5263273/v1), 2024-11-21
Supplement: Supplementary file 1 [file 6b961b10165a483fecad61f7.xlsx]

## Sheet: S1 - WGCNA1
WGCNA module membership
Tissue	moduleNumber	moduleColor	Lipid	Lipid_Class	MM_value	p_value
BAT	M1	turquoise	TG(56:7)_feature1	TAG	0.975387	1.43296e-24
BAT	M1	turquoise	TG(58:10)_feature1	TAG	0.973641	4.69126e-24
BAT	M1	turquoise	TG(56:8)>TG(18:2_18:2_20:4)_feature1	TAG	0.969931	4.56348e-23
BAT	M1	turquoise	TG(58:11)_feature1	TAG	0.969566	5.62045e-23
BAT	M1	turquoise	TG(53:6)>TG(17:2_18:2_18:2)_and_TG(17:1_18:2_18:3)_feature3	TAG	0.957711	1.61841e-20
BAT	M1	turquoise	TG(58:9)_feature3	TAG	0.955189	4.37093e-20
BAT	M1	turquoise	TG(58:9)_feature1	TAG	0.953874	7.17518e-20
BAT	M1	turquoise	SM(d42:3)_feature2	SM	0.948126	5.35192e-19
BAT	M1	turquoise	TG(58:9)_feature2	TAG	0.945774	1.14128e-18
BAT	M1	turquoise	TG(56:8)_feature2	TAG	0.944708	1.59075e-18
BAT	M1	turquoise	TG(58:8)>TG(18:2_18:2_22:4)_feature4	TAG	0.944075	1.93182e-18
BAT	M1	turquoise	TG(58:8)_feature3	TAG	0.939334	7.72539e-18
BAT	M1	turquoise	TG(48:6)>TG(10:0_16:0_22:6)_feature2	TAG	0.933102	4.06804e-17
BAT	M1	turquoise	TG(55:7)_feature1	TAG	0.927446	1.60847e-16
BAT	M1	turquoise	TG(54:8)_feature1	TAG	0.926265	2.11339e-16
BAT	M1	turquoise	TG(46:5)>TG(10:0_18:2_18:3)_feature1	TAG	0.922186	5.24708e-16
BAT	M1	turquoise	TG(51:4)>TG(16:1_17:1_18:2)_and_TG(15:0_18:2_18:2)_and_TG(15:1_18:1_18:2)_feature1	TAG	0.92041	7.67552e-16
BAT	M1	turquoise	TG(53:5)>TG(17:1_18:2_18:2)_feature1	TAG	0.916191	1.83175e-15
BAT	M1	turquoise	TG(54:7)>TG(18:2_18:2_18:3)_feature2	TAG	0.915379	2.15411e-15
BAT	M1	turquoise	TG(52:6)_feature4	TAG	0.913928	2.86674e-15
BAT	M1	turquoise	TG(50:8)>TG(10:0_18:2_22:6)_and_TG(10:0_20:4_20:4)_feature1	TAG	0.913778	2.95176e-15
BAT	M1	turquoise	TG(44:4)>TG(8:0_18:2_18:2)_feature1	TAG	0.911377	4.68111e-15
BAT	M1	turquoise	TG(56:9)_feature2	TAG	0.903732	1.87169e-14
BAT	M1	turquoise	TG(58:7)>TG(18:0_18:1_22:6)_feature4	TAG	0.898983	4.18139e-14
BAT	M1	turquoise	TG(46:6)>TG(8:0_18:2_20:4)_feature2	TAG	0.895697	7.12776e-14
BAT	M1	turquoise	TG(56:9)_feature3	TAG	0.894676	8.38211e-14
BAT	M1	turquoise	TG(58:5)_feature1	TAG	0.892431	1.19026e-13
BAT	M1	turquoise	TG(52:7)_feature2	TAG	0.891346	1.40617e-13
BAT	M1	turquoise	TG(58:11)_feature2	TAG	0.890403	1.62315e-13
BAT	M1	turquoise	TG(55:2)_feature1	TAG	0.890094	1.701e-13
BAT	M1	turquoise	TG(56:6)>TG(18:1_18:1_20:4)_and_TG(16:0_18:1_22:5)_and_TG(18:1_18:2_20:3)_feature3	TAG	0.889341	1.90481e-13
BAT	M1	turquoise	TG(52:3)>TG(16:0_18:1_18:2)_feature2	TAG	0.886844	2.75783e-13
BAT	M1	turquoise	TG(54:6)>TG(16:0_18:2_20:4)_feature5	TAG	0.875887	1.26998e-12
BAT	M1	turquoise	TG(54:5)>TG(18:1_18:2_18:2)_feature3	TAG	0.875316	1.36971e-12
BAT	M1	turquoise	TG(49:4)_feature1	TAG	0.873462	1.74645e-12
BAT	M1	turquoise	TG(53:3)>TG(17:0_18:1_18:2)_and_TG(17:1_18:1_18:1)_and_TG(16:1_18:1_19:1)_and_TG(16:0_18:1_19:2)_feature2	TAG	0.872966	1.86237e-12
BAT	M1	turquoise	DG(36:5)>DG(18:2_18:3_0:0)_feature1	DAG	0.872772	1.90973e-12
BAT	M1	turquoise	TG(60:10)>TG(18:0_20:4_22:6)_feature3	TAG	0.871924	2.13013e-12
BAT	M1	turquoise	TG(58:7)>TG(18:0_18:1_22:6)_feature1	TAG	0.868027	3.48506e-12
BAT	M1	turquoise	TG(56:10)>TG(18:2_18:3_20:5)_feature1	TAG	0.865076	5.00792e-12
BAT	M1	turquoise	LPC(20:1/0:0)_and_LPC(0:0/20:1)_feature3	LPC	0.863442	6.09889e-12
BAT	M1	turquoise	TG(43:2)_feature1	TAG	0.853228	1.9791e-11
BAT	M1	turquoise	TG(46:6)>TG(8:0_16:0_22:6)_feature1	TAG	0.850819	2.57898e-11
BAT	M1	turquoise	DG(38:6)>DG(18:2_20:4_0:0)_feature1	DAG	0.849944	2.83595e-11
BAT	M1	turquoise	TG(45:3)>TG(10:0_17:1_18:2)_and_TG(9:0_18:1_18:2)_feature1	TAG	0.849144	3.09185e-11
BAT	M1	turquoise	TG(58:8)_feature5	TAG	0.846989	3.89201e-11
BAT	M1	turquoise	TG(58:6)_feature4	TAG	0.846718	4.00522e-11
BAT	M1	turquoise	TG(55:5)>TG(18:2_18:2_19:1)_and_TG(18:1_18:2_19:2)_feature2	TAG	0.840633	7.52184e-11
BAT	M1	turquoise	TG(38:4)>TG(2:0_18:2_18:2)_feature1	TAG	0.835961	1.19914e-10
BAT	M1	turquoise	PC(O-36:5)>PC(O-16:1/20:4)_feature5	O-PC	0.831416	1.86191e-10
BAT	M1	turquoise	TG(55:4)>TG(18:1_18:2_19:1)_and_TG(18:2_18:2_19:0)_and_TG(18:1_18:1_19:2)_feature2	TAG	0.83087	1.9611e-10
BAT	M1	turquoise	TG(48:4)>TG(12:0_18:2_18:2)_feature1	TAG	0.830704	1.99243e-10
BAT	M1	turquoise	TG(58:7)>TG(18:0_18:1_22:6)_feature5	TAG	0.830194	2.09094e-10
BAT	M1	turquoise	TG(54:4)>TG(18:1_18:1_18:2)_and_TG(18:0_18:2_18:2)_feature5	TAG	0.829383	2.25731e-10
BAT	M1	turquoise	DG(38:5)>DG(18:1_20:4_0:0)_feature2	DAG	0.82576	3.16221e-10
BAT	M1	turquoise	TG(51:2)_feature3	TAG	0.815917	7.60954e-10
BAT	M1	turquoise	TG(58:5)_feature5	TAG	0.81352	9.35035e-10
BAT	M1	turquoise	Cer(d34:1)>Cer(d18:1/16:0)_feature1	Cer	0.804288	2.01303e-09
BAT	M1	turquoise	TG(60:4)_feature2	TAG	0.80355	2.13662e-09
BAT	M1	turquoise	TG(57:4)_feature1	TAG	0.800727	2.67705e-09
BAT	M1	turquoise	TG(51:5)>TG(15:0_18:2_18:3)_and_TG(51:5)>TG(15:1_18:2_18:2)_feature2	TAG	0.794029	4.50757e-09
BAT	M1	turquoise	TG(53:3)>TG(17:0_18:1_18:2)_and_TG(17:1_18:1_18:1)_and_TG(16:1_18:1_19:1)_and_TG(16:0_18:1_19:2)_feature3	TAG	0.793368	4.74077e-09
BAT	M1	turquoise	TG(50:6)_feature2	TAG	0.793132	4.82646e-09
BAT	M1	turquoise	Cer(m34:2)>Cer(m18:1/16:1)_feature1	Cer	0.783321	9.97852e-09
BAT	M1	turquoise	DG(38:4)>DG(16:0_22:4_0:0)_feature2	DAG	0.780771	1.19786e-08
BAT	M1	turquoise	SM(d34:1)_feature1	SM	0.77906	1.35227e-08
BAT	M1	turquoise	PC(36:3)_feature1	PC	0.764836	3.56097e-08
BAT	M1	turquoise	DG(36:2)>DG(18:0_18:2_0:0)_feature2	DAG	0.759594	5.00308e-08
BAT	M1	turquoise	TG(56:5)>TG(16:0_18:1_22:4)_feature3	TAG	0.756405	6.12745e-08
BAT	M1	turquoise	TG(48:4)>TG(12:0_18:2_18:2)_and_TG(14:1_16:1_18:2)_feature2	TAG	0.754258	7.01152e-08
BAT	M1	turquoise	TG(58:6)>TG(18:0_18:0_22:6)_feature7	TAG	0.745706	1.18353e-07
BAT	M1	turquoise	TG(56:5)>TG(16:0_18:1_22:4)_feature4	TAG	0.740412	1.61998e-07
BAT	M1	turquoise	TG(52:3)>TG(16:0_18:1_18:2)_feature1	TAG	0.738402	1.82151e-07
BAT	M1	turquoise	TG(42:4)_feature2	TAG	0.736736	2.00572e-07
BAT	M1	turquoise	TG(50:5)_feature2	TAG	0.736162	2.07316e-07
BAT	M1	turquoise	Cer(d34:1)_feature1	Cer	0.72936	3.0472e-07
BAT	M1	turquoise	TG(56:6)>TG(18:0_16:0_22:6)_feature5	TAG	0.729104	3.09102e-07
BAT	M1	turquoise	PE(42:8)>PE(20:4_22:4)_feature4	PE	0.719934	5.1015e-07
BAT	M1	turquoise	DG(36:3)>DG(18:1_18:2_0:0)_feature2	DAG	0.718985	5.36712e-07
BAT	M1	turquoise	TG(45:2)_feature1	TAG	0.716695	6.06097e-07
BAT	M1	turquoise	TG(40:4)>TG(4:0_18:2_18:2)_feature1	TAG	0.715481	6.46139e-07
BAT	M1	turquoise	DG(40:4)>DG(18:0_22:4_0:0)_feature3	DAG	0.707066	9.98001e-07
BAT	M1	turquoise	PE(O-34:5)>PE(O-17:1/20:4)_feature1	O-PE	0.706428	1.03081e-06
BAT	M1	turquoise	TG(40:5)>TG(4:0_18:2_18:3)_feature1	TAG	0.703868	1.17268e-06
BAT	M1	turquoise	TG(56:5)>TG(16:0_18:1_22:4)_feature2	TAG	0.703061	1.22094e-06
BAT	M1	turquoise	TG(56:7)_feature4	TAG	0.69699	1.6473e-06
BAT	M1	turquoise	PE(44:10)>PE(22:4_22:6)_feature1	PE	0.692974	2.00032e-06
BAT	M1	turquoise	TG(42:5)_feature2	TAG	0.691444	2.15222e-06
BAT	M1	turquoise	HexCer(d40:1)>HexCer(d18:1/22:0)_feature2	HexCer	0.682118	3.33024e-06
BAT	M1	turquoise	TG(52:5)>TG(16:1_18:2_18:2)_feature2	TAG	0.681018	3.50257e-06
BAT	M1	turquoise	PE(40:7)>PE(18:2_22:5)_feature1	PE	0.680772	3.5421e-06
BAT	M1	turquoise	PC(32:0)_feature1	PC	0.679391	3.77236e-06
BAT	M1	turquoise	PC(39:5)_feature6	PC	0.676926	4.2178e-06
BAT	M1	turquoise	TG(58:4)_feature5	TAG	0.673956	4.818e-06
BAT	M1	turquoise	TG(52:6)>TG(16:1_18:2_18:3)_and_TG(16:2_18:2_18:2)_feature3	TAG	0.665211	7.06811e-06
BAT	M1	turquoise	TG(54:7)>TG(18:2_18:2_18:3)_feature1	TAG	0.661206	8.38909e-06
BAT	M1	turquoise	DG(38:3)>DG(18:2_20:1_0:0)_feature2	DAG	0.656433	1.02561e-05
BAT	M1	turquoise	TG(60:10)>TG(18:0_20:4_22:6)_feature4	TAG	0.64916	1.38376e-05
BAT	M1	turquoise	TG(53:3)>TG(17:0_18:1_18:2)_and_TG(17:1_18:1_18:1)_and_TG(16:1_18:1_19:1)_and_TG(16:0_18:1_19:2)_feature1	TAG	0.641339	1.89313e-05
BAT	M1	turquoise	TG(48:5)_feature1	TAG	0.633395	2.57987e-05
BAT	M1	turquoise	TG(56:4)>TG(18:1_18:2_20:1)_and_TG(18:1_18:1_20:2)_feature1	TAG	0.632615	2.65821e-05
BAT	M1	turquoise	TG(56:4)>TG(18:1_18:2_20:1)_and_TG(18:1_18:1_20:2)_feature4	TAG	0.628898	3.0623e-05
BAT	M1	turquoise	TG(54:8)_feature2	TAG	0.623872	3.69727e-05
BAT	M1	turquoise	TG(52:5)>TG(16:0_18:2_18:3)_feature5	TAG	0.609528	6.21994e-05
BAT	M1	turquoise	TG(53:2)_feature4	TAG	0.608695	6.40579e-05
BAT	M1	turquoise	PE(38:1)>PE(18:1_20:0)_and_PE(18:0_20:1)_feature2	PE	0.608198	6.51902e-05
BAT	M1	turquoise	TG(51:3)>TG(15:0_18:1_18:2)_and_TG(16:0_17:1_18:2)_and_TG(16:1_17:1_18:1)_feature3	TAG	0.607632	6.65015e-05
BAT	M1	turquoise	TG(47:3)_feature2	TAG	0.602467	7.96214e-05
BAT	M1	turquoise	DG(40:6)>DG(18:0_22:6_0:0)_feature6	DAG	0.594393	0.000104853
BAT	M1	turquoise	PE(35:2)>PE(17:0_18:2)_feature1	PE	0.584713	0.000144467
BAT	M1	turquoise	TG(50:7)>TG(10:0_18:2_22:5)_feature1	TAG	0.583765	0.000148991
BAT	M1	turquoise	TG(40:3)>TG(4:0_18:1_18:2)_feature2	TAG	0.58354	0.000150087
BAT	M1	turquoise	TG(41:3)>TG(5:0_18:1_18:2)_feature1	TAG	0.582759	0.000153935
BAT	M1	turquoise	TG(44:2)>TG(10:0_16:1_18:1)_feature2	TAG	0.582639	0.000154534
BAT	M1	turquoise	SM(d41:0)_feature1	SM	0.580983	0.00016302
BAT	M1	turquoise	PE(39:4)>PE(19:0_20:4)_feature2	PE	0.579232	0.000172446
BAT	M1	turquoise	DG(36:3)>DG(18:1_18:2_0:0)_feature3	DAG	0.578893	0.000174326
BAT	M1	turquoise	DG(38:4)>DG(16:0_22:4_0:0)_feature4	DAG	0.577809	0.000180464
BAT	M1	turquoise	TG(42:3)_feature1	TAG	0.574234	0.000202104
BAT	M1	turquoise	TG(53:4)>TG(17:0_18:2_18:2)_and_TG(17:1_18:1_18:2)_feature3	TAG	0.56835	0.000242832
BAT	M1	turquoise	PE(O-40:6)>PE(O-18:2/22:4)_feature2	O-PE	0.560576	0.000307869
BAT	M1	turquoise	Car(16:1)_feature2	Car	0.557971	0.000332914
BAT	M1	turquoise	PE(O-36:5)>PE(O-16:1/20:4)_feature2	O-PE	0.5536	0.000379056
BAT	M1	turquoise	TG(38:3)>TG(4:0_16:1_18:2)_feature1	TAG	0.551957	0.000397826
BAT	M1	turquoise	TG(58:6)_feature5	TAG	0.547091	0.000458381
BAT	M1	turquoise	TG(49:2)_feature3	TAG	0.538715	0.000582084
BAT	M1	turquoise	TG(56:7)_feature5	TAG	0.538247	0.000589785
BAT	M1	turquoise	TG(54:4)_feature6	TAG	0.535555	0.000635956
BAT	M1	turquoise	PC(35:4)>PC(15:0_20:4)_feature2	PC	0.52984	0.000744746
BAT	M1	turquoise	PC(O-36:5)_feature5	O-PC	0.529323	0.000755357
BAT	M1	turquoise	DG(36:2)>DG(18:0_18:2_0:0)_feature4	DAG	0.523354	0.000887966
BAT	M1	turquoise	TG(54:3)>TG(18:0_18:1_18:2)_and_TG(18:1/18:1/18:1)_and_TG(16:0_18:2_20:1)_feature9	TAG	0.516614	0.00106214
BAT	M1	turquoise	SM(d43:1)_feature2	SM	0.515207	0.00110209
BAT	M1	turquoise	PE(40:5)>PE(18:0_22:5)_feature3	PE	0.511993	0.00119839
BAT	M1	turquoise	PE(44:10)_feature1	PE	0.511154	0.0012247
BAT	M1	turquoise	sn-glycero-3-phosphocholine_feature1	Organic phosphoric acids	0.509844	0.00126684
BAT	M1	turquoise	TG(58:3)>TG(18:1_20:1_20:1)_and_TG(18:1_18:1_22:1)_feature2	TAG	0.502385	0.001532
BAT	M1	turquoise	TG(54:6)>TG(16:0_16:0_22:6)_feature6	TAG	0.496663	0.00176731
BAT	M1	turquoise	PS(36:1)>PS(18:0_18:1)_feature1	PS	0.495246	0.00183031
BAT	M1	turquoise	TG(58:7)>TG(18:0_18:1_22:6)_feature3	TAG	0.49472	0.00185416
BAT	M1	turquoise	Cer(d42:2)_feature3	Cer	0.488937	0.00213524
BAT	M1	turquoise	LPE(O-15:0)_feature1	O-LPE	0.476291	0.002883
BAT	M1	turquoise	TG(42:6)>TG(4:0_16:0_22:6)_feature1	TAG	0.471224	0.00324146
BAT	M1	turquoise	PE(O-36:5)>PE(O-16:1/20:4)_feature3	O-PE	0.46309	0.00389805
BAT	M1	turquoise	PG(40:8)>PG(18:2_22:6)_feature1	PG	0.456142	0.0045475
BAT	M1	turquoise	PC(34:0)>PC(16:0_18:0)_feature3	PC	0.450209	0.00517417
BAT	M1	turquoise	TG(54:4)>TG(18:1_18:1_18:2)_feature4	TAG	0.448986	0.00531229
BAT	M1	turquoise	TG(58:4)_feature6	TAG	0.447027	0.00554012
BAT	M1	turquoise	PE(O-38:7)>PE(O-18:3/20:4)_feature1	O-PE	0.440808	0.00631994
BAT	M1	turquoise	TG(58:4)_feature7	TAG	0.439658	0.006474
BAT	M1	turquoise	PC(35:2)>PC(17:0_18:2)_feature2	PC	0.435518	0.00705596
BAT	M1	turquoise	TG(52:4)>TG(16:0_16:0_20:4)_and_TG(16:1_18:1_18:2)_and_TG(16:0_18:1_18:2)_feature6	TAG	0.433144	0.00740945
BAT	M1	turquoise	Car(14:0-OH)_feature1	Car	0.428881	0.00808243
BAT	M1	turquoise	TG(53:6)>TG(17:2_18:2_18:2)_and_TG(17:1_18:2_18:3)_feature2	TAG	0.423524	0.00900154
BAT	M1	turquoise	TG(56:6)>TG(18:1_18:1_20:4)_and_TG(16:0_18:1_22:5)_and_TG(18:1_18:2_20:3)_feature2	TAG	0.42272	0.00914689
BAT	M1	turquoise	Car(16:2-OH)_feature1	Car	0.422221	0.00923812
BAT	M1	turquoise	TG(57:3)_feature1	TAG	0.421209	0.00942561
BAT	M1	turquoise	TG(52:1)_feature1	TAG	0.420811	0.00950017
BAT	M1	turquoise	PS(40:6)>PS(18:0_22:6)_feature1	PS	0.414359	0.0107815
BAT	M1	turquoise	PE(O-34:5)>PE(O-17:1/20:4)_feature2	O-PE	0.410662	0.0115796
BAT	M1	turquoise	SM(d42:3)_feature1	SM	0.396847	0.0150209
BAT	M1	turquoise	PC(40:5)>PC(18:0_22:5)_feature3	PC	0.395283	0.01546
BAT	M1	turquoise	TG(58:6)_feature3	TAG	0.393859	0.0158689
BAT	M1	turquoise	TG(57:4)_feature2	TAG	0.392473	0.0162758
BAT	M1	turquoise	PC(32:0)>PC(16:0_16:0)_feature2	PC	0.379596	0.0204913
BAT	M1	turquoise	TG(51:1)_feature2	TAG	0.377924	0.0211001
BAT	M1	turquoise	Cer(d43:2)>Cer(d18:1/25:1)_feature1and2	Cer	0.37693	0.021469
BAT	M1	turquoise	TG(60:4)_feature1	TAG	0.373371	0.0228345
BAT	M1	turquoise	PE(42:10)_feature3	PE	0.368784	0.0247003
BAT	M1	turquoise	PS(40:5)>PS(18:0_22:5)_feature2	PS	0.364461	0.0265723
BAT	M1	turquoise	TG(46:3)>TG(10:0_18:1_18:2)_and_TG(12:0_16:1_18:2)_feature1	TAG	0.358683	0.0292563
BAT	M1	turquoise	SM(d40:2)_feature2	SM	0.357865	0.0296535
BAT	M1	turquoise	TG(56:7)>TG(16:0_18:1_22:6)_feature7	TAG	0.35706	0.0300489
BAT	M1	turquoise	PE(44:12)_feature2	PE	0.355017	0.0310717
BAT	M1	turquoise	PC(39:5)_feature1	PC	0.354961	0.0311002
BAT	M1	turquoise	TG(38:2)>TG(4:0_16:1_18:1)_and_TG(4:0_16:0_18:2)_feature2	TAG	0.336927	0.0414339
BAT	M1	turquoise	TG(60:3)_feature2	TAG	0.33049	0.0457357
BAT	M1	turquoise	Cer(d34:0)>Cer(d18:0/16:0)_feature1	DHCer	0.329353	0.0465312
BAT	M1	turquoise	TG(54:2)>TG(16:0_18:1_20:1)_and_TG(18:0_18:1_18:1)_feature2	TAG	0.324368	0.0501531
BAT	M1	turquoise	PI(36:2)>PI(18:0_18:2)_feature2	PI	0.319884	0.0536006
BAT	M1	turquoise	TG(54:5)>TG(18:1_18:2_18:2)_and_TG(16:0_16:0_22:5)_and_TG(16:0_18:1_20:4)_feature5	TAG	0.317613	0.0554177
BAT	M1	turquoise	PS(40:5)_feature2	PS	0.312166	0.0599757
BAT	M1	turquoise	PG(38:4)>PG(18:0_20:4)_feature3	PG	0.306785	0.064766
BAT	M1	turquoise	TG(55:3)>TG(18:1_18:1_19:1)_and_TG(18:1_18:2_19:0)_feature3	TAG	0.30529	0.0661496
BAT	M1	turquoise	TG(53:6)>TG(17:2_18:2_18:2)_and_TG(17:1_18:2_18:3)_feature1	TAG	0.300598	0.0706413
BAT	M1	turquoise	PC(O-36:4)_feature3	O-PC	0.297883	0.0733481
BAT	M1	turquoise	PE(O-37:5)>PE(O-17:1/20:4)_feature1	O-PE	0.28903	0.0827402
BAT	M1	turquoise	TG(54:6)>TG(18:2/18:2/18:2)_and_TG(18:1_18:2_18:3)_feature1	TAG	0.286525	0.0855596
BAT	M1	turquoise	TG(50:6)_feature1	TAG	0.234963	0.161557
BAT	M1	turquoise	PS(38:3)_feature2	PS	0.188622	0.263553
BAT	M1	turquoise	TG(54:7)>TG(18:2_18:2_18:3)_feature3	TAG	0.151723	0.370025
BAT	M1	turquoise	TG(53:1)>TG(16:0_18:1_19:0)_and_TG(17:0_18:0_18:1)_feature3	TAG	0.146502	0.386912
BAT	M1	turquoise	TG(48:4)>TG(12:0_18:2_18:2)_and_TG(14:1_16:1_18:2)_feature3	TAG	0.133155	0.432067
BAT	M1	turquoise	TG(55:1)>TG(18:0_18:1_19:0)_and_TG(16:0_18:1_21:0)_feature1	TAG	0.0172315	0.919372
BAT	M2	blue	Cer(d42:1)>Cer(d18:1/24:0)_feature3	Cer	0.952142	1.34917e-19
BAT	M2	blue	PC(41:3)_feature1	PC	0.943901	2.03664e-18
BAT	M2	blue	Cer(d41:1)>Cer(d18:1/23:0)_feature1	Cer	0.938738	9.12345e-18
BAT	M2	blue	PE(38:5)>PE(18:1_20:4)_feature3	PE	0.93355	3.62898e-17
BAT	M2	blue	PC(38:6)_feature1	PC	0.928768	1.17819e-16
BAT	M2	blue	PE(38:6)_feature2	PE	0.926777	1.87842e-16
BAT	M2	blue	PE(38:4)>PE(18:0_20:4)_feature5	PE	0.924579	3.09644e-16
BAT	M2	blue	PC(42:9)_feature3	PC	0.92099	6.78601e-16
BAT	M2	blue	PE(36:2)>PE(18:2_18:0)_feature3	PE	0.919657	8.9966e-16
BAT	M2	blue	PC(40:4)_feature2	PC	0.914762	2.43381e-15
BAT	M2	blue	PC(40:8)_feature1	PC	0.910712	5.30706e-15
BAT	M2	blue	PC(38:3)_feature3	PC	0.910698	5.32102e-15
BAT	M2	blue	PE(36:4)>PE(16:0_20:4)_feature3	PE	0.909278	6.93236e-15
BAT	M2	blue	PE(40:4)>PE(18:0_22:4)_feature4	PE	0.908229	8.40556e-15
BAT	M2	blue	PE(40:5)_feature4	PE	0.908128	8.56146e-15
BAT	M2	blue	PC(37:2)_feature2	PC	0.905087	1.47667e-14
BAT	M2	blue	PE(38:6)_feature3	PE	0.902782	2.20536e-14
BAT	M2	blue	PC(36:2)_feature2	PC	0.900612	3.188e-14
BAT	M2	blue	PC(38:4)_feature4	PC	0.900319	3.34871e-14
BAT	M2	blue	Cer(d44:2)>Cer(d18:1/26:1)_feature1	Cer	0.899085	4.11166e-14
BAT	M2	blue	PE(38:5)_feature5	PE	0.896081	6.70346e-14
BAT	M2	blue	Cer(d42:2)>Cer(d18:1/24:1)_feature_3	Cer	0.89209	1.25457e-13
BAT	M2	blue	PC(42:6)_feature3	PC	0.889622	1.82623e-13
BAT	M2	blue	PE(40:8)_feature1	PE	0.884886	3.66403e-13
BAT	M2	blue	PE(O-40:5)>PE(O-18:1/22:4)_feature5	O-PE	0.878447	9.00713e-13
BAT	M2	blue	PE(38:3)>PE(18:0_20:3)_feature3	PE	0.87491	1.44508e-12
BAT	M2	blue	PC(36:4)_feature3	PC	0.872391	2.00599e-12
BAT	M2	blue	PE(34:2)_feature2	PE	0.869303	2.97131e-12
BAT	M2	blue	PC(36:1)_feature1	PC	0.868533	3.27203e-12
BAT	M2	blue	PC(O-38:7)_feature1	O-PC	0.857603	1.20874e-11
BAT	M2	blue	PE(38:3)>PE(18:0_20:3)_feature4	PE	0.850289	2.73203e-11
BAT	M2	blue	PE(O-38:4)_feature3	O-PE	0.848165	3.4341e-11
BAT	M2	blue	PE(O-40:7)>PE(O-18:1/22:6)_feature7	O-PE	0.845579	4.51619e-11
BAT	M2	blue	PC(35:1)_feature1	PC	0.839286	8.6177e-11
BAT	M2	blue	PE(40:6)_feature3	PE	0.827015	2.81606e-10
BAT	M2	blue	PE(38:5)_feature2	PE	0.826315	3.00439e-10
BAT	M2	blue	SM(d42:1)_feature2	SM	0.816858	7.01298e-10
BAT	M2	blue	PC(38:0)_feature1	PC	0.8126	1.01121e-09
BAT	M2	blue	PC(36:2)_feature3	PC	0.811549	1.10517e-09
BAT	M2	blue	PC(O-32:1)_feature2	O-PC	0.810405	1.21673e-09
BAT	M2	blue	PC(40:5)_feature4	PC	0.807851	1.5046e-09
BAT	M2	blue	PC(38:5)_feature5	PC	0.800127	2.80712e-09
BAT	M2	blue	PE(40:7)_feature3	PE	0.799805	2.87944e-09
BAT	M2	blue	PC(34:2)_feature1	PC	0.799173	3.02626e-09
BAT	M2	blue	SM(d42:0)_feature1	SM	0.799061	3.05292e-09
BAT	M2	blue	PE(42:8)>PE(20:4_22:4)_feature2	PE	0.798334	3.23205e-09
BAT	M2	blue	PS(40:7)_feature1	PS	0.796555	3.71176e-09
BAT	M2	blue	carnitine_feature1	Carnitines	0.788192	6.99038e-09
BAT	M2	blue	PC(40:6)_feature3	PC	0.783916	9.55881e-09
BAT	M2	blue	PC(44:5)_feature2	PC	0.775388	1.74784e-08
BAT	M2	blue	PE(40:6)_feature2	PE	0.771096	2.34524e-08
BAT	M2	blue	SM(d39:1)_feature2	SM	0.767653	2.95563e-08
BAT	M2	blue	SM(d40:1)_feature1	SM	0.764775	3.57529e-08
BAT	M2	blue	PC(42:5)_feature6	PC	0.759947	4.89127e-08
BAT	M2	blue	PS(40:5)_feature3	PS	0.755217	6.60286e-08
BAT	M2	blue	PC(O-38:5)_feature3	O-PC	0.749984	9.13214e-08
BAT	M2	blue	PC(42:8)_feature2	PC	0.743042	1.38735e-07
BAT	M2	blue	PE(O-40:4)_feature4	O-PE	0.737637	1.90408e-07
BAT	M2	blue	PC(42:9)_feature2	PC	0.733059	2.47491e-07
BAT	M2	blue	PE(40:4)>PE(20:0_20:4)_feature3	PE	0.732999	2.48331e-07
BAT	M2	blue	PC(34:4)_feature2	PC	0.730581	2.84604e-07
BAT	M2	blue	SM(d36:0)_feature1	SM	0.729433	3.03488e-07
BAT	M2	blue	PE(42:10)_feature1	PE	0.728715	3.15885e-07
BAT	M2	blue	PC(40:4)_feature1	PC	0.727132	3.4485e-07
BAT	M2	blue	PC(42:4)_feature2	PC	0.726427	3.58531e-07
BAT	M2	blue	PE(36:4)>PE(16:0_20:4)_feature1	PE	0.724545	3.97517e-07
BAT	M2	blue	PC(36:0)_feature2	PC	0.724233	4.04355e-07
BAT	M2	blue	Cer(d40:1)_feature1	Cer	0.719694	5.16755e-07
BAT	M2	blue	SM(d41:1)_feature1	SM	0.715053	6.6083e-07
BAT	M2	blue	PC(37:3)_feature1	PC	0.713616	7.1242e-07
BAT	M2	blue	SM(d44:2)_feature1	SM	0.712364	7.60395e-07
BAT	M2	blue	Cer(d41:1)_feature1	Cer	0.71076	8.26136e-07
BAT	M2	blue	PC(38:6)>PC(18:2_20:4)_feature1	PC	0.704099	1.15916e-06
BAT	M2	blue	PC(36:5)_feature3	PC	0.701668	1.30868e-06
BAT	M2	blue	PE(O-40:6)>PE(O-18:1/22:5)_feature5	O-PE	0.690246	2.27833e-06
BAT	M2	blue	PC(39:5)_feature7	PC	0.688839	2.43517e-06
BAT	M2	blue	LPC(22:6)>LPC(22:6/0:0)_and_LPC(0:0/22:6)_feature1and2	LPC	0.686888	2.66911e-06
BAT	M2	blue	LPC(20:1)>LPC(20:1/0:0)_and_LPC(0:0/20:1)_feature1and2	LPC	0.678482	3.93142e-06
BAT	M2	blue	PC(38:1)_feature1	PC	0.677764	4.06119e-06
BAT	M2	blue	PC(36:2)>PC(18:0_18:2)_feature3	PC	0.668821	6.04298e-06
BAT	M2	blue	PI(34:2)	PI	0.655359	1.07253e-05
BAT	M2	blue	PE(39:4)>PE(19:0_20:4)_feature3	PE	0.652249	1.21965e-05
BAT	M2	blue	LPC(20:0)>LPC(20:0/0:0)_and_LPC(0:0/20:0)_feature1and2	LPC	0.650878	1.29016e-05
BAT	M2	blue	PE(O-40:7)_feature10	O-PE	0.646995	1.51051e-05
BAT	M2	blue	Cer(d42:1)_feature3	Cer	0.646557	1.53743e-05
BAT	M2	blue	PC(40:0)_feature1	PC	0.643213	1.75753e-05
BAT	M2	blue	CL(72:7)_feature1	CL	0.64226	1.82531e-05
BAT	M2	blue	CL(72:6)_feature1	CL	0.630142	2.92128e-05
BAT	M2	blue	PE(40:5)>PE(18:0_22:5)_feature4	PE	0.62973	2.96731e-05
BAT	M2	blue	PE(38:5)>PE(16:0_22:5)_and_PE(38:5)>PE(18:1_20:4)_feature3	PE	0.623486	3.75065e-05
BAT	M2	blue	PC(38:4)>PC(18:0_20:4)_feature4	PC	0.623475	3.75216e-05
BAT	M2	blue	PE(40:5)_feature3	PE	0.615044	5.10777e-05
BAT	M2	blue	PC(34:3)_feature3	PC	0.614864	5.14089e-05
BAT	M2	blue	PC(40:8)>PC(20:4_20:4)_feature1	PC	0.603793	7.60485e-05
BAT	M2	blue	PC(40:7)_feature1	PC	0.600295	8.58028e-05
BAT	M2	blue	PC(O-38:5)_feature2	O-PC	0.59902	8.96312e-05
BAT	M2	blue	PE(38:6)>PE(18:2_20:4)_feature2	PE	0.59681	9.66347e-05
BAT	M2	blue	Arachidonoyl-EA	NAE	0.591133	0.000116936
BAT	M2	blue	DG(38:4)>DG(18:0_20:4_0:0)_feature6	DAG	0.587354	0.000132505
BAT	M2	blue	PE(36:2)>PE(18:0_18:2)_feature2	PE	0.584331	0.000146277
BAT	M2	blue	9-HETE	Oxylipin	0.583081	0.000152339
BAT	M2	blue	PC(40:5)_feature3	PC	0.582528	0.000155091
BAT	M2	blue	Car(4:0)_feature1	Car	0.55984	0.000314763
BAT	M2	blue	Cer(d43:1)>Cer(d18:1/25:0)_feature2	Cer	0.557819	0.000334437
BAT	M2	blue	11,12-EpETrE	Oxylipin	0.552657	0.000389737
BAT	M2	blue	PE(37:4)>PE(17:0_20:4)_feature2	PE	0.55249	0.000391653
BAT	M2	blue	PE(38:5)_feature1	PE	0.55008	0.000420283
BAT	M2	blue	Linoleoyl-EA	NAE	0.530651	0.00072837
BAT	M2	blue	CL(74:10)_feature1	CL	0.530013	0.000741226
BAT	M2	blue	PC(40:4)>PC(18:0_22:4)_feature2	PC	0.520251	0.000964718
BAT	M2	blue	SM(d41:2)_feature1	SM	0.517265	0.00104408
BAT	M2	blue	PE(36:5)_feature1	PE	0.516483	0.00106582
BAT	M2	blue	PE(40:4)>PE(18:0_22:4)_feature1	PE	0.515336	0.00109836
BAT	M2	blue	CL(70:6)_feature1	CL	0.485426	0.00232351
BAT	M2	blue	PE(40:5)_feature2	PE	0.483965	0.00240605
BAT	M2	blue	PC(33:1)_feature1	PC	0.471043	0.00325494
BAT	M2	blue	PG(36:4)>PG(18:2/18:2)_feature1	PG	0.465982	0.00365247
BAT	M2	blue	PE(40:6)_feature1	PE	0.465899	0.00365928
BAT	M2	blue	PI(36:1)>PI(18:0_18:1)_feature1	PI	0.457559	0.00440795
BAT	M2	blue	DG(36:4)>DG(16:0_20:4_0:0)_feature2	DAG	0.457115	0.00445127
BAT	M2	blue	PE(44:10)_feature2	PE	0.456147	0.00454701
BAT	M2	blue	9,10-DiHOME	Oxylipin	0.454633	0.00470028
BAT	M2	blue	PC(32:1)_feature2	PC	0.422215	0.00923925
BAT	M2	blue	PC(O-38:4)_feature4	O-PC	0.412621	0.0111508
BAT	M2	blue	PC(38:3)_feature2	PC	0.408316	0.0121117
BAT	M2	blue	PC(39:4)_feature4	PC	0.403448	0.0132823
BAT	M2	blue	Cer(d41:2)>Cer(d18:2/23:0)_feature2	Cer	0.401277	0.0138342
BAT	M2	blue	Car(20:4)_feature1	Car	0.39756	0.0148243
BAT	M2	blue	PC(O-40:9)>PC(O:20:5/20:4)_feature1	O-PC	0.394914	0.0155651
BAT	M2	blue	SM(d38:2)_feature1	SM	0.392951	0.0161344
BAT	M2	blue	Cer(d42:3)_feature2	Cer	0.385127	0.0185807
BAT	M2	blue	PS(38:3)_feature3	PS	0.380417	0.0201977
BAT	M2	blue	PC(39:6)_feature2	PC	0.355367	0.0308945
BAT	M2	blue	PC(37:4)_feature2	PC	0.346857	0.035446
BAT	M2	blue	DG(35:4)_feature1	DAG	0.344774	0.0366401
BAT	M2	blue	PE(O-36:3)>PE(O-18:1/18:2)_feature6	O-PE	0.344192	0.0369792
BAT	M2	blue	Car(22:4)_feature1	Car	0.342404	0.0380378
BAT	M2	blue	LPC(17:0)>LPC(17:0/0:0)_and_LPC(0:0/17:0)_feature1and2	LPC	0.331994	0.0446994
BAT	M2	blue	PE(O-38:6)>PE(O-18:2/20:4)_and_PE(O-16:1/22:5)_feature4	O-PE	0.331746	0.044869
BAT	M2	blue	PS(36:2)_feature2	PS	0.331636	0.0449445
BAT	M2	blue	PE(40:4)>PE(18:0_22:4)_feature2	PE	0.318717	0.0545288
BAT	M2	blue	PC(O-38:6)_feature2	O-PC	0.307744	0.0638911
BAT	M2	blue	SM(d43:2)_feature2	SM	0.307136	0.0644449
BAT	M2	blue	TG(56:2)_feature1	TAG	0.270392	0.105535
BAT	M2	blue	SM(d41:2)_feature2	SM	0.266559	0.110764
BAT	M2	blue	SM(d40:2)_feature1	SM	0.256774	0.124995
BAT	M3	brown	PE(O-38:7)>PE(O-16:1/22:6)_feature2	O-PE	0.947915	5.73743e-19
BAT	M3	brown	PE(O-40:7)>PE(O-18:1/22:6)_feature11	O-PE	0.942554	3.052e-18
BAT	M3	brown	PE(40:5)_feature5	PE	0.941182	4.56307e-18
BAT	M3	brown	PE(O-40:8)>PE(O-18:2/22:6)_feature2	O-PE	0.941109	4.65999e-18
BAT	M3	brown	PE(O-40:6)>PE(O-18:1/22:5)_feature4	O-PE	0.923176	4.22745e-16
BAT	M3	brown	PE(O-40:7)>PE(O-18:2/22:5)_feature4	O-PE	0.911717	4.38916e-15
BAT	M3	brown	PC(37:6)_feature1	PC	0.909618	6.50885e-15
BAT	M3	brown	PC(38:6)_feature2	PC	0.908277	8.33089e-15
BAT	M3	brown	Cer(d36:1)>Cer(d18:1/18:0)_feature1	Cer	0.907263	1.00153e-14
BAT	M3	brown	PC(39:6)_feature3	PC	0.885302	3.45086e-13
BAT	M3	brown	PC(O-38:7)_feature2	O-PC	0.874029	1.62186e-12
BAT	M3	brown	PC(39:5)_feature2	PC	0.872576	1.95864e-12
BAT	M3	brown	PS(40:6)_feature3	PS	0.857484	1.22534e-11
BAT	M3	brown	PE(O-34:1)>PE(O-18:1/16:0)_feature2	O-PE	0.845534	4.53745e-11
BAT	M3	brown	PC(O-38:6)_feature3	O-PC	0.823031	4.05548e-10
BAT	M3	brown	PC(38:5)_feature3	PC	0.809604	1.301e-09
BAT	M3	brown	PI(40:5)>PI(18:0_22:5)_feature1	PI	0.805046	1.89304e-09
BAT	M3	brown	Cer(d36:1)_feature1	Cer	0.803768	2.09942e-09
BAT	M3	brown	PE(O-38:5)_feature3	O-PE	0.803134	2.2093e-09
BAT	M3	brown	PE(O-40:8)>PE(O-22:8/18:0)_and_PE(O-18:2/22:6)_feature2	O-PE	0.791141	5.6102e-09
BAT	M3	brown	Car(14:1)_feature1	Car	0.789079	6.54542e-09
BAT	M3	brown	PI(40:6)>PI(18:0_22:6)_feature2	PI	0.785385	8.59138e-09
BAT	M3	brown	PC(40:7)_feature3	PC	0.781581	1.13062e-08
BAT	M3	brown	Car(10:0)_feature1	Car	0.7728	2.08846e-08
BAT	M3	brown	PC(42:7)_feature4	PC	0.767541	2.97768e-08
BAT	M3	brown	PC(38:6)>PC(16:0_22:6)_and_PC(38:6)>PC(18:0_20:6)_feature2	PC	0.767449	2.99606e-08
BAT	M3	brown	PC(O-40:6)_feature5	O-PC	0.75995	4.89043e-08
BAT	M3	brown	PE(O-38:7)>PE(O-16:1/22:6)_and_PE(O-20:7/18:0)_feature2	O-PE	0.757591	5.68463e-08
BAT	M3	brown	PS(40:6)>PS(18:0_22:6)_feature2	PS	0.746309	1.14143e-07
BAT	M3	brown	Car(16:2)_feature1	Car	0.746256	1.14501e-07
BAT	M3	brown	PE(O-34:1)>PE(O-18:1_16:0)_feature2	O-PE	0.745704	1.18368e-07
BAT	M3	brown	PC(O-40:7)_feature3	O-PC	0.722047	4.5531e-07
BAT	M3	brown	Car(12:0)_feature2	Car	0.719167	5.31499e-07
BAT	M3	brown	PC(36:4)>PC(16:0_20:4)_feature3	PC	0.717375	5.84678e-07
BAT	M3	brown	Car(16:1)_feature1	Car	0.69858	1.52411e-06
BAT	M3	brown	PC(37:4)>PC(17:0_20:4)_feature3	PC	0.688167	2.51348e-06
BAT	M3	brown	3-(1-pyrazolyl)-alanine_feature1	Amino acids and peptides	0.684846	2.93571e-06
BAT	M3	brown	SM(d36:1)_feature1	SM	0.683589	3.11178e-06
BAT	M3	brown	PG(34:1)>PG(16:0_18:1)_feature1	PG	0.678646	3.90232e-06
BAT	M3	brown	Car(6:0)_feature1	Car	0.672363	5.17124e-06
BAT	M3	brown	PE(40:6)>PE(18:0_22:6)_feature2	PE	0.669684	5.8192e-06
BAT	M3	brown	PC(35:4)_feature2	PC	0.665756	6.90362e-06
BAT	M3	brown	PC(37:4)_feature3	PC	0.65936	9.07101e-06
BAT	M3	brown	Car(8:0)_feature1	Car	0.642404	1.81497e-05
BAT	M3	brown	Car(18:1)_feature1	Car	0.628911	3.06074e-05
BAT	M3	brown	Car(18:2)_feature1	Car	0.621115	4.09425e-05
BAT	M3	brown	Car(18:0-OH)_feature1	Car	0.609425	6.24282e-05
BAT	M3	brown	Car(12:1)_feature1	Car	0.608107	6.54001e-05
BAT	M3	brown	Car(14:2)_feature1	Car	0.594947	0.000102916
BAT	M3	brown	Car(14:0)_feature1	Car	0.573857	0.000204517
BAT	M3	brown	PI(38:4)>PI(18:0_20:4)_feature2	PI	0.564048	0.000277105
BAT	M3	brown	Car(16:0)_feature1	Car	0.557707	0.000335549
BAT	M3	brown	PC(35:2)_feature2	PC	0.519985	0.000971573
BAT	M3	brown	Car(4:0-OH)_feature1	Car	0.473794	0.00305507
BAT	M3	brown	Cer(d38:1)_feature1	Cer	0.449836	0.00521597
BAT	M3	brown	Car(16:0-OH)_feature1	Car	0.402623	0.01349
BAT	M3	brown	TG(56:6)>TG(18:1_18:1_20:4)_and_TG(16:0_18:1_22:5)_and_TG(18:1_18:2_20:3)_feature1	TAG	0.398898	0.0144615
BAT	M3	brown	Car(20:1)_feature1	Car	0.386841	0.01802
BAT	M3	brown	PC(34:2)>PC(16:0_18:2)_feature1	PC	0.380148	0.0202935
BAT	M3	brown	PE(36:2)>PE(18:0_18:2)_feature1	PE	0.371044	0.0237659
BAT	M3	brown	Car(20:2)_feature1	Car	0.368358	0.0248796
BAT	M3	brown	CL(74:11)_feature1	CL	0.361017	0.0281464
BAT	M3	brown	Car(14:1-OH)_feature1	Car	0.317751	0.0553064
BAT	M3	brown	PE(40:5)_feature1	PE	0.284035	0.0884352
BAT	M4	yellow	LPE(18:1)>LPE(18:1/0:0)_and_LPE(0:0/18:1)_feature1and2	LPE	0.950842	2.13402e-19
BAT	M4	yellow	PC(38:2)_feature5	PC	0.919318	9.6578e-16
BAT	M4	yellow	PE(36:3)_feature1	PE	0.89391	9.45522e-14
BAT	M4	yellow	PE(34:1)_feature1	PE	0.886588	2.86304e-13
BAT	M4	yellow	PC(35:4)_feature3	PC	0.877777	9.86128e-13
BAT	M4	yellow	PC(36:3)_feature2	PC	0.87764	1.00453e-12
BAT	M4	yellow	PE(36:5)_feature2	PE	0.869987	2.72606e-12
BAT	M4	yellow	PC(34:1)_feature2	PC	0.858025	1.15162e-11
BAT	M4	yellow	PC(36:1)>PC(16:0_20:1)_and_PC(18:0_18:1)_feature1	PC	0.857662	1.2006e-11
BAT	M4	yellow	PC(34:3)_feature1	PC	0.849592	2.94623e-11
BAT	M4	yellow	PE(36:1)_feature3	PE	0.848067	3.47051e-11
BAT	M4	yellow	PE(38:4)>PE(18:0_20:4)_feature8	PE	0.846037	4.30371e-11
BAT	M4	yellow	PE(36:2)>PE(18:2_18:0)_feature2	PE	0.825914	3.11759e-10
BAT	M4	yellow	PC(36:4)_feature2	PC	0.812944	9.82035e-10
BAT	M4	yellow	PE(36:5)_feature3	PE	0.793241	4.78647e-09
BAT	M4	yellow	LPE(16:0)>LPE(16:0/0:0)_and_LPE(0:0/16:0)_feature1and2	LPE	0.780341	1.23508e-08
BAT	M4	yellow	PC(36:3)>PC(18:1_18:2)_feature2	PC	0.775547	1.72873e-08
BAT	M4	yellow	PE(34:2)>PE(16:0_18:2)_feature2	PE	0.757021	5.89377e-08
BAT	M4	yellow	LPE(18:0)>LPE(18:0/0:0)_and_LPE(0:0/18:0)_feature1and2	LPE	0.755849	6.34595e-08
BAT	M4	yellow	PC(38:7)_feature1	PC	0.742126	1.46461e-07
BAT	M4	yellow	PC(36:4)>PC(18:2/18:2)_feature2	PC	0.74017	1.64308e-07
BAT	M4	yellow	PG(34:2)>PG(16:0_18:2)_feature2	PG	0.736299	2.05692e-07
BAT	M4	yellow	PC(37:1)_feature3	PC	0.714928	6.65184e-07
BAT	M4	yellow	PC(38:3)>PC(18:0_20:3)_feature3	PC	0.695053	1.80972e-06
BAT	M4	yellow	LPC(18:2)>LPC(18:2/0:0)_and_LPC(0:0/18:2)_feature1and2	LPC	0.690352	2.26691e-06
BAT	M4	yellow	LPC(18:1)>LPC(18:1/0:0)_and_LPC(0:0/18:1)_feature1and2	LPC	0.670363	5.64819e-06
BAT	M4	yellow	LPC(18:0)>LPC(18:0/0:0)_and_LPC(0:0/18:0)_feature1and2	LPC	0.663953	7.46084e-06
BAT	M4	yellow	PE(36:3)>PE(18:1_18:2)_feature1	PE	0.658995	9.21169e-06
BAT	M4	yellow	SM(d32:1)_feature1	SM	0.634325	2.4892e-05
BAT	M4	yellow	LPE(20:4)>LPE(20:4/0:0)_feature2	LPE	0.596191	9.86826e-05
BAT	M4	yellow	TG(50:1)_feature2	TAG	0.591702	0.000114743
BAT	M4	yellow	PE(36:1)>PE(18:0_18:1)_feature3	PE	0.568298	0.000243222
BAT	M4	yellow	TG(40:1)_feature3	TAG	0.564777	0.000271013
BAT	M4	yellow	PI(38:3)>PI(18:0_20:3)_feature2	PI	0.563924	0.000278161
BAT	M4	yellow	PC(32:2)_feature1	PC	0.561602	0.000298475
BAT	M4	yellow	PC(34:3)_feature2	PC	0.551377	0.000404646
BAT	M4	yellow	PE(40:7)>PE(18:1_22:6)_and_PE(18:0_22:7)_feature3	PE	0.548485	0.000440246
BAT	M4	yellow	PE(38:6)_feature1	PE	0.511719	0.00120691
BAT	M4	yellow	Coenzyme Q9_feature1	Ubiquinones	0.510459	0.00124691
BAT	M4	yellow	PG(34:2)>PG(16:0_18:2)_feature1	PG	0.481816	0.00253211
BAT	M4	yellow	PC(30:0)_feature1	PC	0.48073	0.00259798
BAT	M4	yellow	PE(38:3)>PE(18:0_20:3)_feature2	PE	0.471983	0.00318537
BAT	M4	yellow	PE(44:12)_feature1	PE	0.457134	0.00444941
BAT	M4	yellow	PC(37:1)_feature2	PC	0.435989	0.00698751
BAT	M4	yellow	PE(35:1)>PE(17:0_18:1)_feature1	PE	0.421136	0.0094393
BAT	M4	yellow	PE(36:2)>PE(18:1/18:1)_feature2	PE	0.385296	0.0185248
BAT	M4	yellow	PE(36:4)>PE(18:2/18:2)_feature1	PE	0.335356	0.0424523
BAT	M4	yellow	DG(34:0)>DG(16:0_18:0_0:0)_feature2	DAG	0.317799	0.0552676
BAT	M5	green	TG(44:1)>TG(10:0_16:0_18:1)_feature3	TAG	0.952781	1.07168e-19
BAT	M5	green	TG(46:1)>TG(12:0_16:0_18:1)_and_TG(10:0_18:0_18:1)_and_TG(14:0_16:0_16:1)_feature2	TAG	0.952227	1.30889e-19
BAT	M5	green	TG(42:0)>TG(10:0_16:0_16:0)_and_TG(12:0_14:0_16:0)_feature1	TAG	0.929849	9.0951e-17
BAT	M5	green	TG(50:3)_feature3	TAG	0.907816	9.06203e-15
BAT	M5	green	PE(36:5)>PE(16:1_20:4)_feature2	PE	0.90288	2.1685e-14
BAT	M5	green	TG(42:1)_feature1	TAG	0.881026	6.32112e-13
BAT	M5	green	TG(40:1)_feature2	TAG	0.879243	8.08118e-13
BAT	M5	green	TG(50:2)>TG(16:0_16:1_18:1)_and_TG(14:0_18:1_18:1)_feature2	TAG	0.878677	8.72907e-13
BAT	M5	green	TG(48:1)>TG(16:0_16:0_16:1)_and_TG(14:0_16:0_18:1)_feature3	TAG	0.875851	1.27597e-12
BAT	M5	green	PE(34:1)>PE(16:0_18:1)_feature1	PE	0.869476	2.90747e-12
BAT	M5	green	PE(34:3)>PE(16:1_18:2)_feature1	PE	0.860777	8.36586e-12
BAT	M5	green	TG(38:1)>TG(4:0_16:0_18:1)_feature3	TAG	0.858842	1.04813e-11
BAT	M5	green	TG(36:1)>TG(4:0_16:0_16:1)_and_TG(2:0_16:0_18:1)_feature1	TAG	0.85861	1.07654e-11
BAT	M5	green	PE(38:7)>PE(16:1_22:6)_feature1	PE	0.850468	2.6795e-11
BAT	M5	green	PC(32:1)_feature1	PC	0.843313	5.71777e-11
BAT	M5	green	TG(39:1)_feature1	TAG	0.822163	4.38589e-10
BAT	M5	green	DG(32:1)>DG(16:0_16:1_0:0)_feature1	DAG	0.818171	6.2524e-10
BAT	M5	green	PC(32:1)>PC(14:0_18:1)_and_PC(16:0_16:1)_feature2	PC	0.813761	9.16011e-10
BAT	M5	green	CL(70:7)_feature1	CL	0.806371	1.69922e-09
BAT	M5	green	PC(34:1)>PC(16:0_18:1)_feature2	PC	0.80509	1.88633e-09
BAT	M5	green	TG(38:0)>TG(10:0_12:0_16:0)_and_TG(10:0_10:0_18:0)_and_TG(8:0_12:0_18:0)_feature2	TAG	0.794503	4.34726e-09
BAT	M5	green	TG(36:0)>TG(4:0_16:0_16:0)_feature4	TAG	0.791969	5.27103e-09
BAT	M5	green	TG(36:0)>TG(4:0_16:0_16:0)_feature1	TAG	0.790909	5.70893e-09
BAT	M5	green	TG(48:2)>TG(14:0_16:0_18:2)_and_TG(14:0_16:1_18:1)_feature3	TAG	0.76702	3.08268e-08
BAT	M5	green	TG(36:0)>TG(10:0_12:0_14:0)_and_TG(10:0_10:0_16:0)_feature2	TAG	0.766613	3.16705e-08
BAT	M5	green	TG(38:0)>TG(10:0_12:0_16:0)_and_TG(10:0_10:0_18:0)_and_TG(8:0_12:0_18:0)_feature3	TAG	0.764005	3.76036e-08
BAT	M5	green	PC(36:5)>PC(16:1_20:4)_feature2	PC	0.754606	6.86046e-08
BAT	M5	green	TG(54:3)>TG(18:0_18:1_18:2)_and_TG(18:1/18:1/18:1)_and_TG(16:0_18:2_20:1)_feature4	TAG	0.739541	1.70463e-07
BAT	M5	green	TG(50:1)>TG(16:0_16:0_18:1)_feature4	TAG	0.737414	1.92873e-07
BAT	M5	green	TG(40:1)_feature1	TAG	0.72451	3.98283e-07
BAT	M5	green	PE(36:4)>PE(16:0_20:4)_feature5	PE	0.720707	4.89429e-07
BAT	M5	green	DG(36:1)>DG(18:0_18:1_0:0)_feature1	DAG	0.716075	6.26252e-07
BAT	M5	green	PI(36:4)>PI(16:0_20:4)_feature1	PI	0.699374	1.46584e-06
BAT	M5	green	TG(46:2)_feature2	TAG	0.691067	2.19116e-06
BAT	M5	green	TG(46:1)>TG(12:0_16:0_18:1)_and_TG(10:0_18:0_18:1)_and_TG(14:0_16:0_16:1)_feature1	TAG	0.682234	3.31241e-06
BAT	M5	green	LPC(16:1)>LPC(16:1/0:0)_and_LPC(0:0/16:1)_feature1and2	LPC	0.681717	3.39207e-06
BAT	M5	green	TG(50:2)>TG(16:0_16:1_18:1)_and_TG(14:0_18:1_18:1)_feature3	TAG	0.677107	4.18344e-06
BAT	M5	green	PC(38:2)>PC(18:0_20:2)_feature4	PC	0.666497	6.68606e-06
BAT	M5	green	TG(44:1)>TG(10:0_16:0_18:1)_feature2	TAG	0.662922	7.79782e-06
BAT	M5	green	PA(34:1)_feature2	PA	0.64997	1.33888e-05
BAT	M5	green	TG(51:3)>TG(15:0_18:1_18:2)_and_TG(16:0_17:1_18:2)_and_TG(16:1_17:1_18:1)_feature2	TAG	0.600873	8.41181e-05
BAT	M5	green	TG(44:2)_feature1	TAG	0.59132	0.000116211
BAT	M5	green	PC(35:0)_feature1	PC	0.542547	0.000522224
BAT	M5	green	coenzyme(Q8)_feature1	Ubiquinones	0.354582	0.031293
BAT	M5	green	TG(40:0)_feature2	TAG	0.222652	0.18532
BAT	M6	red	PC(O-36:1)_feature3	O-PC	0.910956	5.06917e-15
BAT	M6	red	PE(O-36:2)>PE(O-18:1/18:1)_feature2	O-PE	0.904711	1.57744e-14
BAT	M6	red	PC(40:1)_feature1	PC	0.900858	3.05885e-14
BAT	M6	red	HexCer(d40:1)>HexCer(d18:1_22:0)_feature3	HexCer	0.897709	5.153e-14
BAT	M6	red	PC(O-36:2)_feature1	O-PC	0.885178	3.51314e-13
BAT	M6	red	PC(O-32:0)_feature1	O-PC	0.878244	9.25802e-13
BAT	M6	red	PE(O-40:5)>PE(O-18:1/22:4)_feature4	O-PE	0.869604	2.86114e-12
BAT	M6	red	HexCer(d42:1-OH)>HexCer(d18:1/24:0-OH)_feature3	HexCer	0.869179	3.01812e-12
BAT	M6	red	SM(d34:1-OH)_feature1	SM	0.859029	1.02559e-11
BAT	M6	red	PC(O-30:0)_feature1	O-PC	0.856167	1.42366e-11
BAT	M6	red	PC(40:2)_feature1	PC	0.848775	3.2169e-11
BAT	M6	red	PE(O-34:2)>PE(O-16:1/18:1)_and_PE(O-18:2/16:0)_feature1	O-PE	0.847757	3.58714e-11
BAT	M6	red	PC(42:1)_feature2	PC	0.844679	4.96212e-11
BAT	M6	red	SM(d42:2)_feature1	SM	0.839217	8.67806e-11
BAT	M6	red	PE(O-38:4)_feature4	O-PE	0.839189	8.70235e-11
BAT	M6	red	Car(21:2)_feature1	Car	0.835627	1.23907e-10
BAT	M6	red	HexCer(d42:2)>HexCer(d18:1/24:1)_feature3	HexCer	0.835498	1.25493e-10
BAT	M6	red	PE(O-38:2)>PE(O-18:1/20:1)_feature4	O-PE	0.827316	2.73845e-10
BAT	M6	red	PC(O-32:1)_feature1	O-PC	0.799729	2.89669e-09
BAT	M6	red	PE(O-36:4)_feature1	O-PE	0.7694	2.62957e-08
BAT	M6	red	PC(O-34:2)_feature1	O-PC	0.7605	4.72041e-08
BAT	M6	red	PE(O-36:3)>PE(O-18:2/18:1)_feature4	O-PE	0.758378	5.40712e-08
BAT	M6	red	PE(O-34:1)_feature1	O-PE	0.752613	7.76688e-08
BAT	M6	red	PC(O-33:0)_feature4	O-PC	0.726955	3.48238e-07
BAT	M6	red	LPE(O-18:2)_feature1	O-LPE	0.718939	5.3803e-07
BAT	M6	red	SM(d36:2)_feature1	SM	0.700787	1.36711e-06
BAT	M6	red	PC(32:0)_feature2	PC	0.693121	1.98631e-06
BAT	M6	red	PC(O-38:4)_feature6	O-PC	0.68483	2.93793e-06
BAT	M6	red	PC(O-38:4)_feature5	O-PC	0.679339	3.78128e-06
BAT	M6	red	LPC(19:0)>LPC(19:0/0:0)_and_LPC(0:0/19:0)_feature1and2	LPC	0.67666	4.26858e-06
BAT	M6	red	SM(d38:2)_feature2	SM	0.670471	5.62152e-06
BAT	M6	red	PC(33:0)_feature3	PC	0.649008	1.39234e-05
BAT	M6	red	PC(O-36:2)_feature2	O-PC	0.635431	2.38506e-05
BAT	M6	red	PC(O-34:0)_feature1	O-PC	0.625657	3.45922e-05
BAT	M6	red	SM(d38:1)_feature2	SM	0.615654	4.99641e-05
BAT	M6	red	PC(31:0)_feature2	PC	0.603813	7.59934e-05
BAT	M6	red	PC(O-40:4)_feature1	O-PC	0.594261	0.000105321
BAT	M6	red	PC(34:0)_feature4	PC	0.58855	0.000127389
BAT	M6	red	PC(35:0)_feature3	PC	0.514548	0.00112125
BAT	M6	red	SM(d35:1)_feature1	SM	0.48303	0.00246016
BAT	M6	red	Car(18:0)_feature1	Car	0.469558	0.00336743
BAT	M6	red	SM(d40:1)_feature2	SM	0.45842	0.00432493
BAT	M6	red	PC(35:0)_feature2	PC	0.447384	0.00549788
BAT	M6	red	HexCer(d40:2)>HexCer(d18:1/22:1)_feature3	HexCer	0.414603	0.0107304
BAT	M6	red	SM(d33:1)_feature1	SM	0.398824	0.0144814
BAT	M7	black	TG(58:3)>TG(18:1_20:1_20:1)_and_TG(18:1_18:1_22:1)_feature1	TAG	0.899774	3.66742e-14
BAT	M7	black	TG(55:3)_feature1	TAG	0.884452	3.89943e-13
BAT	M7	black	TG(58:6)_feature2	TAG	0.868751	3.18421e-12
BAT	M7	black	TG(58:7)>TG(18:0_18:1_22:6)_feature2	TAG	0.868087	3.45889e-12
BAT	M7	black	TG(58:5)_feature3	TAG	0.857636	1.20419e-11
BAT	M7	black	TG(54:4)>TG(18:1_18:1_18:2)_and_TG(18:0_18:2_18:2)_feature3	TAG	0.851498	2.3946e-11
BAT	M7	black	TG(54:5)>TG(18:1_18:2_18:2)_and_TG(16:0_16:0_22:5)_and_TG(16:0_18:1_20:4)_feature1	TAG	0.846473	4.11055e-11
BAT	M7	black	TG(55:3)_feature2	TAG	0.842342	6.31889e-11
BAT	M7	black	TG(58:4)_feature1	TAG	0.809208	1.34458e-09
BAT	M7	black	PE(38:5)>PE(18:0_20:5)_feature6	PE	0.79304	4.86022e-09
BAT	M7	black	TG(48:2)>TG(14:0_16:0_18:2)_and_TG(14:0_16:1_18:1)_feature2	TAG	0.79114	5.61072e-09
BAT	M7	black	TG(54:1)>TG(18:0_18:0_18:1)_and_TG(16:1_18:0_20:0)_and_TG(16:0_18:0_20:1)_feature1	TAG	0.789302	6.43796e-09
BAT	M7	black	PE(36:4)>(16:0_20:4)_feature3	PE	0.78225	1.07777e-08
BAT	M7	black	TG(48:3)_feature2	TAG	0.740563	1.60572e-07
BAT	M7	black	PE(36:5)_feature5	PE	0.719859	5.1221e-07
BAT	M7	black	TG(50:3)_feature2	TAG	0.707501	9.76164e-07
BAT	M7	black	PE(38:6)>PE(16:0_22:6)_feature3	PE	0.684158	3.03096e-06
BAT	M7	black	TG(53:1)>TG(16:0_18:1_19:0)_and_TG(17:0_18:0_18:1)_feature1	TAG	0.660323	8.70916e-06
BAT	M7	black	TG(52:2)>TG(16:0_18:1_18:1)_and_TG(16:0_18:0_18:2)_feature3	TAG	0.601468	8.24139e-05
BAT	M7	black	PC(39:3)_feature1	PC	0.548543	0.000439506
BAT	M7	black	HexCer(d34:1)>HexCer(d18:1/16:0)_feature1	HexCer	0.527138	0.000801711
BAT	M7	black	TG(52:2)>TG(16:0_18:1_18:1)_and_TG(16:0_18:0_18:2)_feature4	TAG	0.436713	0.00688355
BAT	M7	black	TG(50:4)>TG(16:1_16:1_18:2)_and_TG(16:1_16:1_18:2)_feature1	TAG	0.412514	0.0111738
BAT	M7	black	TG(60:3)_feature1	TAG	0.389265	0.0172509
BAT	M7	black	SM(d42:0)_feature2	SM	0.282833	0.0898502
BAT	M7	black	TG(58:1)>TG(16:0_18:1_24:0)_and_TG(16:0_16:0_26:1)_and_TG(18:0_18:1_22:0)_feature1	TAG	0.274131	0.100618
BAT	M7	black	TG(38:1)>TG(4:0_16:0_18:1)_feature2	TAG	0.238188	0.155712
BAT	M8	pink	TG(39:1)_feature2	TAG	0.914326	2.65193e-15
BAT	M8	pink	TG(34:0)>TG(4:0_14:0_16:0)_feature3	TAG	0.906172	1.21822e-14
BAT	M8	pink	TG(36:3)>TG(2:0_16:1_18:2)_feature1	TAG	0.854561	1.70587e-11
BAT	M8	pink	TG(38:2)>TG(4:0_16:1_18:1)_and_TG(4:0_16:0_18:2)_feature1	TAG	0.838251	9.55852e-11
BAT	M8	pink	TG(36:1)>TG(4:0_16:0_16:1)_and_TG(2:0_16:0_18:1)_feature2	TAG	0.835585	1.24423e-10
BAT	M8	pink	TG(39:2)_feature1	TAG	0.834098	1.43839e-10
BAT	M8	pink	TG(42:1)_feature2	TAG	0.82072	4.99045e-10
BAT	M8	pink	TG(49:3)_feature2	TAG	0.808563	1.41861e-09
BAT	M8	pink	TG(36:2)_feature2	TAG	0.788925	6.62062e-09
BAT	M8	pink	TG(40:0)_feature1	TAG	0.784515	9.1524e-09
BAT	M8	pink	TG(36:2)>TG(2:0_16:0_18:2)_feature3	TAG	0.783792	9.64453e-09
BAT	M8	pink	TG(50:4)>TG(16:1_16:1_18:2)_feature2	TAG	0.768846	2.72923e-08
BAT	M8	pink	Cer(d41:2)_feature2	Cer	0.763429	3.90466e-08
BAT	M8	pink	TG(42:2)_feature2	TAG	0.757742	5.63035e-08
BAT	M8	pink	DG(32:0)>DG(16:0_16:0_0:0)_feature2	DAG	0.739035	1.7557e-07
BAT	M8	pink	TG(40:2)>TG(4:0_18:1_18:1)_feature1	TAG	0.575236	0.000195816
BAT	M8	pink	LPC(16:0)>LPC(16:0/0:0)_and_LPC(0:0/16:0)_feature1and2	LPC	0.524599	0.000858712
BAT	M8	pink	Cer(d40:2)>Cer(d18:2/22:0)_feature2	Cer	0.523661	0.00088066
BAT	M8	pink	Cer(d42:2)>Cer(d18:2/24:0)_feature4	Cer	0.427602	0.00829421
BAT	M8	pink	PC(30:0)>PC(14:0_16:0)_feature1	PC	0.418193	0.0100036
BAT	M8	pink	SM(d44:1)_feature1	SM	0.374325	0.0224616
BAT	M8	pink	PC(34:3)>PC(16:1_18:2)_feature1	PC	0.346305	0.0357593
BAT	M9	magenta	PC(O-34:1)>PC(O-18:1/16:0)_feature2	O-PC	0.927221	1.69498e-16
BAT	M9	magenta	HexCer(d42:2)_feature3	HexCer	0.881195	6.17436e-13
BAT	M9	magenta	HexCer(d40:1)_feature2	HexCer	0.875413	1.35218e-12
BAT	M9	magenta	PE(O-36:4)>PE(O-18:3/18:1)_feature6	O-PE	0.865559	4.72185e-12
BAT	M9	magenta	PE(O-36:3)>PE(O-18:2/18:1)_feature3	O-PE	0.844989	4.80378e-11
BAT	M9	magenta	PE(O-38:5)>PE(O-18:1/20:4)_feature6	O-PE	0.835138	1.29991e-10
BAT	M9	magenta	PE(O-34:2)>PE(O-16:2/18:0)_and_PE(O-18:2/16:0)_feature1	O-PE	0.803806	2.09298e-09
BAT	M9	magenta	PC(O-36:3)_feature1	O-PC	0.794742	4.2684e-09
BAT	M9	magenta	PC(O-38:5)_feature1	O-PC	0.774839	1.81548e-08
BAT	M9	magenta	PS(O-42:7)>PS(O-20:3/22:4)_feature1	O-PS	0.769668	2.58259e-08
BAT	M9	magenta	PE(O-36:4)>PE(O-18:2/18:2)_feature1	O-PE	0.766381	3.21594e-08
BAT	M9	magenta	PE(O-38:6)>PE(O-18:2/20:4)_and_PE(O-16:1/22:5)_feature2	O-PE	0.756659	6.03013e-08
BAT	M9	magenta	Sulfatide(d42:1-OH)_feature1	SHexCer	0.747831	1.04115e-07
BAT	M9	magenta	PE(O-38:5)>PE(O-16:1/22:4)_feature5	O-PE	0.727977	3.29092e-07
BAT	M9	magenta	PC(O-40:6)_feature1	O-PC	0.685123	2.89821e-06
BAT	M9	magenta	PC(O-38:6)_feature1	O-PC	0.666265	6.75347e-06
BAT	M9	magenta	PS(O-40:7)>PS(O-20:3/20:4)_feature1	O-PS	0.64386	1.71286e-05
BAT	M9	magenta	SM(d34:0)_feature1	SM	0.579731	0.000169712
BAT	M9	magenta	HexCer(d42:1)_feature2	HexCer	0.531848	0.000704779
BAT	M9	magenta	SM(d42:2)_feature2	SM	0.520193	0.000966219
BAT	M9	magenta	PE(O-38:6)>PE(O-16:1/22:5)_feature3	O-PE	0.472934	0.00311636
BAT	M9	magenta	PS(36:2)_feature1	PS	0.437083	0.00683083
BAT	NA	grey	PC(37:2)_feature1	PC	-0.853724	1.87303e-11
BAT	NA	grey	PC(33:2)_feature1	PC	-0.821616	4.60631e-10
BAT	NA	grey	PC(35:2)_feature1	PC	-0.790502	5.88586e-09
BAT	NA	grey	TG(49:1)>TG(15:0_16:0_18:0)_and_TG(16:0_16:0_17:1)_and_TG(16:0_16:1_17:0)_feature1	TAG	0.783943	9.53978e-09
BAT	NA	grey	Ubiquinol Q10_feature1	Ubiquinones	-0.737832	1.88267e-07
BAT	NA	grey	PC(35:3)_feature1	PC	-0.718054	5.63982e-07
BAT	NA	grey	TG(44:1)>TG(10:0_16:0_18:1)_feature1	TAG	0.650602	1.30482e-05
BAT	NA	grey	CL(72:8)_feature1	CL	-0.595297	0.000101708
BAT	NA	grey	TG(52:5)>TG(16:1_18:2_18:2)_feature3	TAG	0.593229	0.000109031
BAT	NA	grey	TG(54:1)>TG(18:0_18:0_18:1)_and_TG(16:1_18:0_20:0)_and_TG(16:0_18:0_20:1)_feature3	TAG	0.574801	0.000198521
BAT	NA	grey	TG(54:3)>TG(18:0_18:1_18:2)_and_TG(18:1/18:1/18:1)_and_TG(16:0_18:2_20:1)_feature7	TAG	0.561063	0.000303373
BAT	NA	grey	PC(36:5)_feature1	PC	-0.556734	0.000345432
BAT	NA	grey	TG(54:6)>TG(18:2/18:2/18:2)_and_TG(18:1_18:2_18:3)_feature4	TAG	0.538983	0.000577702
BAT	NA	grey	PE(39:6)>PE(17:0_22:6)_feature2	PE	-0.525426	0.000839769
BAT	NA	grey	TG(52:4)>TG(16:1_18:1_18:2)_feature4	TAG	0.524717	0.000855982
BAT	NA	grey	TG(48:3)_feature1	TAG	0.523579	0.000882616
BAT	NA	grey	PE(40:8)>PE(18:2_22:6)_feature1	PE	-0.493358	0.00191728
BAT	NA	grey	PS(36:1)_feature1	PS	0.477154	0.00282558
BAT	NA	grey	PE(40:7)_feature1	PE	-0.474658	0.00299457
BAT	NA	grey	PC(40:6)>PC(18:0_22:6)_feature3	PC	-0.446535	0.00559858
BAT	NA	grey	9-HODE	Oxylipin	-0.443323	0.00599384
BAT	NA	grey	TG(52:2)>TG(16:0_18:1_18:1)_and_TG(16:0_18:0_18:2)_feature5	TAG	0.42558	0.00863882
BAT	NA	grey	PC(39:6)_feature4	PC	-0.417771	0.0100867
BAT	NA	grey	13-HODE	Oxylipin	-0.390746	0.0167948
BAT	NA	grey	cholesterol_feature1	Sterols	0.371757	0.0234771
BAT	NA	grey	TG(56:1)_feature1	TAG	0.356315	0.0304189
BAT	NA	grey	SM(d38:4)_feature2	SM	0.348075	0.034763
BAT	NA	grey	5-HETE	Oxylipin	-0.342573	0.0379367
BAT	NA	grey	PS(40:4)>PS(18:0_22:4)_feature1	PS	0.32736	0.0479535
BAT	NA	grey	FA(22:6)_feature1	FA	0.327066	0.0481662
BAT	NA	grey	PS(38:4)>PS(18:0_20:4)_feature2	PS	0.325814	0.0490799
BAT	NA	grey	TG(53:4)>TG(17:0_18:2_18:2)_and_TG(17:1_18:1_18:2)_feature2	TAG	0.31118	0.0608323
BAT	NA	grey	Car(10:1)_feature1	Car	-0.307689	0.0639414
BAT	NA	grey	TG(54:5)>TG(18:1_18:2_18:2)_feature4	TAG	0.305871	0.0656095
BAT	NA	grey	TG(57:1)>TG(16:0_18:1_23:0)_and_TG(18:0_18:1_21:0)_feature1	TAG	0.27872	0.0948228
BAT	NA	grey	TG(55:7)_feature2	TAG	0.276353	0.0977795
BAT	NA	grey	TG(40:2)>TG(4:0_18:1_18:1)_feature2	TAG	-0.274137	0.10061
BAT	NA	grey	TG(56:4)>TG(18:1_18:2_20:1)_and_TG(18:1_18:1_20:2)_feature5	TAG	0.269906	0.106188
BAT	NA	grey	11,12-DiHETrE	Oxylipin	0.264555	0.113574
BAT	NA	grey	SM(d40:0-OH)_feature1	SM	-0.263249	0.115434
BAT	NA	grey	PC(36:0)>PC(18:0/18:0)_feature3	PC	-0.256791	0.12497
BAT	NA	grey	PS(40:4)_feature1	PS	-0.255515	0.126921
BAT	NA	grey	adenosine_feature1	Purines	0.23924	0.15384
BAT	NA	grey	Car(3:0)_feature1	Car	-0.230082	0.170699
BAT	NA	grey	Resolvin D1	Oxylipin	-0.225651	0.179316
BAT	NA	grey	TG(56:4)>TG(18:0_18:0_20:4)_feature5	TAG	0.22013	0.190477
BAT	NA	grey	TG(55:4)>TG(18:1_18:2_19:1)_and_TG(18:2_18:2_19:0)_and_TG(18:1_18:1_19:2)_feature1	TAG	0.217518	0.195927
BAT	NA	grey	PE(42:10)>PE(20:4_22:6)_feature1	PE	-0.211639	0.208585
BAT	NA	grey	9S-HpODE	Oxylipin	0.201967	0.230624
BAT	NA	grey	PC(O-40:7)_feature1	O-PC	0.200173	0.23488
BAT	NA	grey	14,15-EpETrE	Oxylipin	-0.199131	0.237376
BAT	NA	grey	TG(52:4)>TG(16:1_18:1_18:2)_feature5	TAG	0.198887	0.237963
BAT	NA	grey	Car(18:1-OH)_feature1	Car	0.197106	0.242277
BAT	NA	grey	Car(2:0)_feature1	Car	0.17232	0.307794
BAT	NA	grey	PI(34:2)>PI(16:0_18:2)_feature1	PI	-0.160938	0.341315
BAT	NA	grey	PS(36:2)>PS(18:0_18:2)_feature4	PS	0.158673	0.348243
BAT	NA	grey	PC(32:2)>PC(14:0_18:2)_feature3	PC	-0.151928	0.369372
BAT	NA	grey	TG(57:2)_feature1	TAG	0.142851	0.398982
BAT	NA	grey	PC(O-36:4)_feature4	O-PC	-0.128019	0.45019
BAT	NA	grey	PE(O-37:5)>PE(O-17:1/20:4)_feature2	O-PE	-0.126711	0.454871
BAT	NA	grey	LPC(15:0)>LPC(15:0/0:0)_and_LPC(0:0/15:0)_feature1and2	LPC	0.125756	0.458307
BAT	NA	grey	PC(O-40:7)_feature2	O-PC	-0.108055	0.524399
BAT	NA	grey	PS(40:6)_feature2	PS	0.102729	0.545158
BAT	NA	grey	erucamide_feature1	Fatty amines	0.0807622	0.634663
BAT	NA	grey	PG(40:7)>PG(18:1_22:6)_feature1	PG	-0.079478	0.640075
BAT	NA	grey	LPC(20:4)>LPC(20:4/0:0)_and_LPC(0:0/20:4)_feature1and2	LPC	0.0772295	0.649595
BAT	NA	grey	Resolvin D2	Oxylipin	-0.0486069	0.775119
BAT	NA	grey	SM(d43:1)_feature1and2	SM	-0.0470361	0.782208
BAT	NA	grey	PS(38:4)>PS(18:0_20:4)_feature3	PS	0.0432339	0.799438
BAT	NA	grey	TG(58:2)_feature2	TAG	0.0372891	0.826563
BAT	NA	grey	PE(O-34:3)>PE(O-16:1/18:2)_feature1	O-PE	0.0337643	0.842742
BAT	NA	grey	TG(56:3)>TG(18:1_18:1_20:1)_and_TG(18:1_18:2_20:0)_and_TG(18:0_18:2_20:1)_and_TG(16:0_18:1_22:2)_feature2	TAG	-0.0226865	0.893974
BAT	NA	grey	TG(41:2)_feature1	TAG	0.0156422	0.926787
BAT	NA	grey	SM(d34:2)_feature1	SM	-0.0137313	0.935712
BAT	NA	grey	5,6-DiHETrE	Oxylipin	0.00167343	0.992157
HEART	M1	turquoise	SM(d41:1)_feature1	SM	0.940054	4.00002e-23
HEART	M1	turquoise	SM(d39:1)_feature2	SM	0.92359	8.87654e-21
HEART	M1	turquoise	PE(O-40:8)>PE(O-18:2/22:6)_feature2	O-PE	0.915615	7.97802e-20
HEART	M1	turquoise	PC(40:1)_feature1	PC	0.912634	1.7158e-19
HEART	M1	turquoise	Cer(d41:1)>Cer(d18:1/23:0)_feature1	Cer	0.910856	2.67492e-19
HEART	M1	turquoise	PC(O-38:7)_feature7	O-PC	0.909107	4.10249e-19
HEART	M1	turquoise	PC(38:1)_feature1	PC	0.901594	2.34597e-18
HEART	M1	turquoise	PC(42:6)_feature4	PC	0.899364	3.83222e-18
HEART	M1	turquoise	SM(d41:2)_feature1	SM	0.897034	6.32332e-18
HEART	M1	turquoise	PC(37:0)_feature5	PC	0.883912	8.62553e-17
HEART	M1	turquoise	PC(39:6)_feature3	PC	0.882486	1.12429e-16
HEART	M1	turquoise	PC(40:7)_feature3	PC	0.881846	1.2648e-16
HEART	M1	turquoise	PC(42:5)_feature6	PC	0.881308	1.39558e-16
HEART	M1	turquoise	PC(38:6)_feature2	PC	0.880838	1.52045e-16
HEART	M1	turquoise	PC(38:0)_feature1	PC	0.872361	6.71912e-16
HEART	M1	turquoise	SM(d44:3)_feature1	SM	0.871234	8.12037e-16
HEART	M1	turquoise	PC(41:6)_feature3	PC	0.870666	8.92946e-16
HEART	M1	turquoise	LPE(18:0)>LPE(18:0/0:0)_feature2	LPE	0.868874	1.20098e-15
HEART	M1	turquoise	PC(40:6)_feature3	PC	0.861402	3.95042e-15
HEART	M1	turquoise	PC(42:3)_feature1	PC	0.861168	4.09584e-15
HEART	M1	turquoise	SM(d40:1)_feature2	SM	0.860978	4.21784e-15
HEART	M1	turquoise	LPC(24:0)>LPC(24:0/0:0)_feature2	LPC	0.859046	5.66883e-15
HEART	M1	turquoise	PC(40:8)_feature1	PC	0.857297	7.3812e-15
HEART	M1	turquoise	SM(d44:2)_feature1	SM	0.856848	7.89411e-15
HEART	M1	turquoise	PC(44:12)_feature1	PC	0.854098	1.18544e-14
HEART	M1	turquoise	Cer(d44:2)>Cer(d18:1/26:1)_feature1	Cer	0.854024	1.19834e-14
HEART	M1	turquoise	Cer(d41:2)>Cer(d18:2/23:0)_feature2	Cer	0.852895	1.4125e-14
HEART	M1	turquoise	LPC(22:0)>LPC(22:0/0:0)_feature2	LPC	0.852403	1.51674e-14
HEART	M1	turquoise	Cer(d41:1)_feature1	Cer	0.848745	2.55564e-14
HEART	M1	turquoise	PC(44:5)_feature2	PC	0.847667	2.9723e-14
HEART	M1	turquoise	PC(O-40:7)_feature3	O-PC	0.843869	5.01601e-14
HEART	M1	turquoise	SM(d39:1)_feature1	SM	0.83967	8.80514e-14
HEART	M1	turquoise	PE(O-40:5)>PE(O-18:1/22:4)_feature5	O-PE	0.833053	2.06996e-13
HEART	M1	turquoise	Cer(d41:2)_feature2	Cer	0.832566	2.20107e-13
HEART	M1	turquoise	PE(O-42:7)>PE(O-20:1/22:6)_feature3	O-PE	0.829441	3.24964e-13
HEART	M1	turquoise	PE(O-40:8)>PE(O-22:8/18:0)_and_PE(O-18:2/22:6)_feature2	O-PE	0.819348	1.08606e-12
HEART	M1	turquoise	PC(42:4)_feature5	PC	0.815213	1.74282e-12
HEART	M1	turquoise	PE(38:6)_feature3	PE	0.80895	3.48974e-12
HEART	M1	turquoise	SM(d44:1)_feature1	SM	0.806902	4.35531e-12
HEART	M1	turquoise	HexCer(d40:1)>HexCer(d18:1/22:0)_feature3	HexCer	0.805363	5.13585e-12
HEART	M1	turquoise	Cer(d42:2)>Cer(d18:2/24:0)_feature4	Cer	0.801486	7.72856e-12
HEART	M1	turquoise	PC(40:2)_feature2	PC	0.801427	7.7761e-12
HEART	M1	turquoise	PC(40:8)>PC(20:4_20:4)_feature1	PC	0.800652	8.42943e-12
HEART	M1	turquoise	PC(42:6)_feature3	PC	0.786319	3.52258e-11
HEART	M1	turquoise	PE(40:6)_feature1	PE	0.783021	4.82054e-11
HEART	M1	turquoise	SM(d38:1)_feature2	SM	0.780273	6.23501e-11
HEART	M1	turquoise	SM(d40:2)_feature2	SM	0.78027	6.23667e-11
HEART	M1	turquoise	Cer(d42:1)>Cer(d18:1/24:0)_feature3	Cer	0.780136	6.31451e-11
HEART	M1	turquoise	LPC(20:1)>LPC(20:1/0:0)_feature2	LPC	0.776577	8.76242e-11
HEART	M1	turquoise	PC(42:4)_feature3	PC	0.772487	1.26749e-10
HEART	M1	turquoise	PE(O-38:2)>PE(O-18:1/20:1)_feature4	O-PE	0.771873	1.33884e-10
HEART	M1	turquoise	PC(O-38:7)_feature2	O-PC	0.76778	1.92044e-10
HEART	M1	turquoise	SM(d41:2)_feature2and3	SM	0.766342	2.17615e-10
HEART	M1	turquoise	Cer(d44:1)>Cer(d18:1/26:0)_feature1	Cer	0.761093	3.40928e-10
HEART	M1	turquoise	Cer(d40:2)_feature2	Cer	0.753386	6.45825e-10
HEART	M1	turquoise	PC(42:7)_feature4	PC	0.742212	1.56652e-09
HEART	M1	turquoise	Cer(d39:1)>Cer(d18:1/21:0)_feature1	Cer	0.739372	1.94813e-09
HEART	M1	turquoise	PC(39:5)_feature5	PC	0.727787	4.60964e-09
HEART	M1	turquoise	PC(38:7)_feature2	PC	0.725793	5.32273e-09
HEART	M1	turquoise	PC(O-38:7)_feature1	O-PC	0.724489	5.84377e-09
HEART	M1	turquoise	PC(39:6)>PC(17:0_22:6)_feature3	PC	0.724408	5.87792e-09
HEART	M1	turquoise	SM(d38:2)_feature2	SM	0.720699	7.64361e-09
HEART	M1	turquoise	PC(38:6)>PC(16:0_22:6)_and_PC(38:6)>PC(18:0_20:6)_feature2	PC	0.720367	7.82389e-09
HEART	M1	turquoise	Cer(d40:2)>Cer(d18:2/22:0)_feature2	Cer	0.719985	8.03631e-09
HEART	M1	turquoise	PC(44:4)_feature2	PC	0.719103	8.54778e-09
HEART	M1	turquoise	PE(O-40:7)>PE(O-18:1/22:6)_feature7	O-PE	0.71813	9.14692e-09
HEART	M1	turquoise	PE(38:6)>PE(16:0_22:6)_feature3	PE	0.716314	1.03726e-08
HEART	M1	turquoise	PC(40:6)>PC(18:0_22:6)_feature3	PC	0.715851	1.07088e-08
HEART	M1	turquoise	PC(34:3)_feature3	PC	0.706153	2.05974e-08
HEART	M1	turquoise	PC(41:7)_feature1	PC	0.696361	3.8848e-08
HEART	M1	turquoise	Cer(d40:1)_feature1	Cer	0.68908	6.12782e-08
HEART	M1	turquoise	PC(37:6)_feature1	PC	0.687278	6.84562e-08
HEART	M1	turquoise	PE(40:6)>PE(18:0_22:6)_feature2	PE	0.684307	8.20331e-08
HEART	M1	turquoise	SM(d34:1-OH)_feature1	SM	0.680238	1.04745e-07
HEART	M1	turquoise	PE(O-40:4)_feature2	O-PE	0.679914	1.06783e-07
HEART	M1	turquoise	SM(d36:0)_feature1	SM	0.671807	1.7172e-07
HEART	M1	turquoise	SM(d39:2)_feature2	SM	0.671511	1.74673e-07
HEART	M1	turquoise	PC(O-32:1)_feature2	O-PC	0.670888	1.81044e-07
HEART	M1	turquoise	PE(P-40:4)>PE(P-20:0/20:4)_feature4	O-PE	0.666778	2.28886e-07
HEART	M1	turquoise	PE(O-42:6)>PE(O-18:1/24:5)_feature2	O-PE	0.665056	2.52238e-07
HEART	M1	turquoise	SM(d42:2)_feature1	SM	0.659133	3.50636e-07
HEART	M1	turquoise	SM(d34:2)_feature1	SM	0.657219	3.89418e-07
HEART	M1	turquoise	PC(36:6)_feature3	PC	0.652716	4.96974e-07
HEART	M1	turquoise	PC(O-34:1)_feature4	O-PC	0.64939	5.93509e-07
HEART	M1	turquoise	PS(38:3)_feature2	PS	0.649371	5.94115e-07
HEART	M1	turquoise	PE(41:6)>PE(19:0_22:6)_feature2	PE	0.648317	6.28233e-07
HEART	M1	turquoise	SM(d42:2)_feature1and2	SM	0.648283	6.29345e-07
HEART	M1	turquoise	PS(40:6)>PS(18:0_22:6)_feature1	PS	0.64773	6.48001e-07
HEART	M1	turquoise	PC(37:1)_feature3	PC	0.621547	2.42102e-06
HEART	M1	turquoise	DG(40:6)>DG(18:0_22:6_0:0)_feature6	DAG	0.611644	3.86497e-06
HEART	M1	turquoise	SM(d42:1)_feature2	SM	0.60871	4.42598e-06
HEART	M1	turquoise	Cer(d42:1)_feature3	Cer	0.604818	5.28675e-06
HEART	M1	turquoise	PE(39:6)>PE(17:0_22:6)_feature2	PE	0.593138	8.8878e-06
HEART	M1	turquoise	PC(O-38:5)_feature3	O-PC	0.586933	1.16172e-05
HEART	M1	turquoise	CE(18:2)_feature1	CE	0.581071	1.4887e-05
HEART	M1	turquoise	PC(O-40:7)_feature2	O-PC	0.58096	1.49565e-05
HEART	M1	turquoise	Cer(d42:3)_feature2	Cer	0.57653	1.79808e-05
HEART	M1	turquoise	Car(26:1)_feature1	Car	0.576043	1.83455e-05
HEART	M1	turquoise	PC(O-32:1)>PC(O-16:1/16:0)_feature2	O-PC	0.575705	1.86028e-05
HEART	M1	turquoise	PC(O-32:1)_feature1	O-PC	0.566704	2.68013e-05
HEART	M1	turquoise	LPC(20:0)>LPC(20:0/0:0)_feature2	LPC	0.558104	3.76178e-05
HEART	M1	turquoise	PC(37:0)_feature2	PC	0.558073	3.76642e-05
HEART	M1	turquoise	LPC(22:6)>LPC(22:6/0:0)_and_LPC(0:0/22:6)_feature1and2	LPC	0.54548	6.08577e-05
HEART	M1	turquoise	PC(O-36:1)_feature3	O-PC	0.544898	6.21928e-05
HEART	M1	turquoise	PE(O-36:2)>PE(O-18:1/18:1)_feature2	O-PE	0.541924	6.94466e-05
HEART	M1	turquoise	PE(38:3)>PE(18:0_20:3)_feature4	PE	0.525117	0.000127106
HEART	M1	turquoise	PC(O-34:2)_feature2	O-PC	0.518029	0.000162481
HEART	M1	turquoise	PC(O-36:3)_feature2	O-PC	0.513766	0.000187847
HEART	M1	turquoise	PC(40:7)>PC(18:1_22:6)_feature3	PC	0.50349	0.000264436
HEART	M1	turquoise	SM(d42:3)_feature1	SM	0.500753	0.000289126
HEART	M1	turquoise	PC(42:2)_feature2	PC	0.494885	0.000349243
HEART	M1	turquoise	PS(44:10)_feature1	PS	0.490105	0.000406311
HEART	M1	turquoise	PC(32:0)_feature2	PC	0.482018	0.000522304
HEART	M1	turquoise	PE(O-38:7)>PE(O-16:1/22:6)_feature2	O-PE	0.475556	0.000635566
HEART	M1	turquoise	PC(35:0)_feature3	PC	0.473584	0.000674285
HEART	M1	turquoise	PE(40:5)_feature2	PE	0.470435	0.00074052
HEART	M1	turquoise	Cer(d42:2)>Cer(d18:1/24:1)_feature3	Cer	0.469059	0.000771235
HEART	M1	turquoise	PE(O-40:7)>PE(O-18:1/22:6)_and_PE(O-22:7/18:0)_feature9	O-PE	0.461188	0.000970073
HEART	M1	turquoise	PE(40:4)>PE(18:0_22:4)_feature4	PE	0.458837	0.00103776
HEART	M1	turquoise	PE(O-40:7)>PE(O-18:2/22:5)_feature1	O-PE	0.45279	0.00123169
HEART	M1	turquoise	PE(38:6)>PE(18:0_22:6)_feature6	PE	0.446037	0.00148597
HEART	M1	turquoise	PG(38:4)>PG(18:0_20:4)_feature3	PG	0.442332	0.00164448
HEART	M1	turquoise	PE(34:0)>PE(16:0_18:0)_feature2	PE	0.430968	0.00222851
HEART	M1	turquoise	PC(39:1)_feature4	PC	0.428223	0.00239459
HEART	M1	turquoise	SM(d42:2)_feature2	SM	0.425303	0.00258317
HEART	M1	turquoise	PS(40:6)>PS(18:0_22:6)_feature2	PS	0.423077	0.00273564
HEART	M1	turquoise	PC(O-38:6)_feature3	O-PC	0.419222	0.00301857
HEART	M1	turquoise	Docosahexenoyl-EA	NAE	0.40245	0.00457179
HEART	M1	turquoise	Car(24:1)_feature1	Car	0.400626	0.00477697
HEART	M1	turquoise	PS(36:2)>PS(18:1_18:1)_feature3	PS	0.397548	0.00514149
HEART	M1	turquoise	PC(O-30:0)_feature1	O-PC	0.379337	0.00783634
HEART	M1	turquoise	Car(24:0)_feature1	Car	0.368875	0.00988108
HEART	M1	turquoise	PC(O-40:6)_feature5	O-PC	0.367166	0.0102554
HEART	M1	turquoise	Cer(d42:2)_feature3	Cer	0.361235	0.0116506
HEART	M1	turquoise	arginine_feature1	Amino acids and peptides	0.356515	0.0128743
HEART	M1	turquoise	SM(d34:0)_feature1	SM	0.353083	0.0138316
HEART	M1	turquoise	PA(34:1)_feature2	PA	0.331003	0.0215614
HEART	M1	turquoise	PC(O-34:2)_feature1	O-PC	0.32654	0.023501
HEART	M1	turquoise	Cer(d40:1)>Cer(d18:1/22:0)_feature2	Cer	0.316362	0.0284772
HEART	M1	turquoise	PC(O-36:3)_feature3	O-PC	0.281968	0.0521809
HEART	M1	turquoise	LPC(19:0)>LPC(19:0/0:0)_feature2	LPC	0.26238	0.0716064
HEART	M1	turquoise	SM(d35:1)_feature1	SM	0.0745081	0.614753
HEART	M2	blue	PE(34:2)_feature2	PE	0.968014	2.87347e-29
HEART	M2	blue	PE(36:4)>PE(16:0_20:4)_feature1	PE	0.964152	3.79504e-28
HEART	M2	blue	PC(36:4)_feature2	PC	0.959953	4.6346e-27
HEART	M2	blue	PC(34:2)>PC(16:0_18:2)_feature1	PC	0.934879	2.53939e-22
HEART	M2	blue	PE(36:2)>PE(18:0_18:2)_feature2	PE	0.928829	1.83464e-21
HEART	M2	blue	PC(36:2)_feature3	PC	0.927794	2.52846e-21
HEART	M2	blue	PE(36:2)>PE(18:2_18:0)_feature3	PE	0.925632	4.86735e-21
HEART	M2	blue	PC(34:2)_feature1	PC	0.925621	4.8842e-21
HEART	M2	blue	PE(34:2)>PE(16:0_18:2)_feature2	PE	0.923728	8.52711e-21
HEART	M2	blue	PC(36:2)>PC(18:0_18:2)_feature3	PC	0.917343	5.05308e-20
HEART	M2	blue	PC(36:4)>PC(18:2/18:2)_feature2	PC	0.91338	1.42033e-19
HEART	M2	blue	PC(36:3)>PC(18:1_18:2)_feature2	PC	0.908779	4.43996e-19
HEART	M2	blue	PC(35:2)_feature2	PC	0.905193	1.03601e-18
HEART	M2	blue	PG(34:2)>PG(16:0_18:2)_feature1	PG	0.902617	1.86584e-18
HEART	M2	blue	PE(O-36:3)>PE(O-18:1/18:2)_feature6	O-PE	0.899888	3.41837e-18
HEART	M2	blue	PE(36:3)_feature1	PE	0.879222	2.03567e-16
HEART	M2	blue	PC(35:2)>PC(17:0_18:2)_feature2	PC	0.865919	1.9396e-15
HEART	M2	blue	PE(36:3)>PE(18:1_18:2)_feature1	PE	0.843217	5.47995e-14
HEART	M2	blue	PE(36:4)>PE(18:2/18:2)_feature1	PE	0.835058	1.60396e-13
HEART	M2	blue	PC(32:2)_feature1	PC	0.83214	2.32236e-13
HEART	M2	blue	PE(O-34:3)>PE(O-16:1/18:2)_feature1	O-PE	0.831837	2.41215e-13
HEART	M2	blue	PC(36:3)_feature2	PC	0.816381	1.52673e-12
HEART	M2	blue	PC(34:3)_feature1	PC	0.811976	2.50323e-12
HEART	M2	blue	PE(38:5)_feature1	PE	0.797926	1.11606e-11
HEART	M2	blue	PC(37:2)_feature1	PC	0.790989	2.23769e-11
HEART	M2	blue	PC(37:2)_feature2	PC	0.789547	2.57733e-11
HEART	M2	blue	PC(33:1)_feature1	PC	0.775081	1.0038e-10
HEART	M2	blue	CL(72:8)_feature1	CL	0.759838	3.78929e-10
HEART	M2	blue	PC(30:0)_feature1	PC	0.75898	4.0716e-10
HEART	M2	blue	PC(40:7)>PC(18:2_22:5)_feature1	PC	0.7388	2.03493e-09
HEART	M2	blue	PE(34:1)_feature1	PE	0.734816	2.74808e-09
HEART	M2	blue	PC(37:3)_feature1	PC	0.732559	3.25028e-09
HEART	M2	blue	PC(35:1)_feature1	PC	0.729996	3.92496e-09
HEART	M2	blue	PG(36:2)>PG(18:0_18:2)_feature2	PG	0.729216	4.15506e-09
HEART	M2	blue	PC(35:3)_feature1	PC	0.727402	4.73984e-09
HEART	M2	blue	PC(40:7)_feature1	PC	0.727325	4.76633e-09
HEART	M2	blue	PE(34:1)>PE(16:0_18:1)_feature1	PE	0.726705	4.98478e-09
HEART	M2	blue	PE(38:5)>PE(16:0_22:5)_and_PE(38:5)>PE(18:1_20:4)_feature3	PE	0.723281	6.36906e-09
HEART	M2	blue	PC(34:1)>PC(16:0_18:1)_feature2	PC	0.720792	7.59415e-09
HEART	M2	blue	PC(38:5)_feature2	PC	0.706221	2.05051e-08
HEART	M2	blue	PC(32:1)_feature1	PC	0.699466	3.1855e-08
HEART	M2	blue	LPC(18:1)>LPC(18:1/0:0)_feature2	LPC	0.694585	4.34696e-08
HEART	M2	blue	PC(36:5)_feature1	PC	0.690637	5.56472e-08
HEART	M2	blue	PC(38:3)_feature3	PC	0.685433	7.66168e-08
HEART	M2	blue	PE(O-36:4)>PE(O-18:2/18:2)_feature1	O-PE	0.675877	1.35533e-07
HEART	M2	blue	PC(30:0)>PC(14:0_16:0)_feature1	PC	0.654915	4.41394e-07
HEART	M2	blue	PC(38:3)>PC(18:0_20:3)_feature3	PC	0.652653	4.98655e-07
HEART	M2	blue	LPC(16:0)>LPC(16:0/0:0)_feature2	LPC	0.646232	7.01129e-07
HEART	M2	blue	PE(38:3)>PE(18:0_20:3)_feature3	PE	0.640721	9.33445e-07
HEART	M2	blue	PS(36:2)>PS(18:0_18:2)_feature4	PS	0.628161	1.75539e-06
HEART	M2	blue	LPC(18:2)>LPC(18:2/0:0)_and_LPC(0:0/18:2)_feature1and2	LPC	0.621521	2.42403e-06
HEART	M2	blue	PC(31:0)_feature2	PC	0.620706	2.52069e-06
HEART	M2	blue	LPC(16:1)>LPC(16:1/0:0)_and_LPC(0:0/16:1)_feature1and2	LPC	0.618964	2.73938e-06
HEART	M2	blue	PE(O-40:7)>PE(O-18:1/22:6)_feature6	O-PE	0.601569	6.12127e-06
HEART	M2	blue	PC(36:1)>PC(16:0_20:1)_and_PC(18:0_18:1)_feature1	PC	0.594944	8.21287e-06
HEART	M2	blue	PC(32:1)>PC(14:0_18:1)_and_PC(16:0_16:1)_feature1	PC	0.593992	8.56228e-06
HEART	M2	blue	PC(35:4)_feature2	PC	0.593864	8.61042e-06
HEART	M2	blue	PE(O-36:4)_feature1	O-PE	0.581192	1.48114e-05
HEART	M2	blue	PC(36:5)_feature3	PC	0.576984	1.76471e-05
HEART	M2	blue	PC(36:2)_feature2	PC	0.569502	2.39532e-05
HEART	M2	blue	PG(36:4)_feature3	PG	0.561454	3.30018e-05
HEART	M2	blue	PE(39:4)>PE(19:0_20:4)_feature3	PE	0.547968	5.54362e-05
HEART	M2	blue	PE(38:6)_feature2	PE	0.541927	6.94392e-05
HEART	M2	blue	PC(36:5)>PC(16:0_20:5)_feature3	PC	0.539884	7.48621e-05
HEART	M2	blue	PE(40:8)>PE(18:2_22:6)_feature1	PE	0.517163	0.000167364
HEART	M2	blue	PC(37:3)_feature2	PC	0.516455	0.00017146
HEART	M2	blue	LPC(17:0)>LPC(17:0/0:0)_and_LPC(0:0/17:0)_feature1and2	LPC	0.513725	0.000188108
HEART	M2	blue	PE(40:8)_feature1	PE	0.499249	0.000303568
HEART	M2	blue	PE(O-34:2)>PE(O-16:2/18:0)_and_PE(O-18:2/16:0)_feature1	O-PE	0.479688	0.000560848
HEART	M2	blue	PC(O-38:4)_feature7	O-PC	0.449017	0.0013685
HEART	M2	blue	sn-glycero-3-phosphocholine_feature1	Organic phosphoric acids	0.421107	0.00287715
HEART	M2	blue	PC(38:6)>PC(18:2_20:4)_feature1	PC	0.391842	0.00588193
HEART	M2	blue	PS(40:8)>PS(20:4/20:4)_feature2	PS	0.387787	0.00646311
HEART	M2	blue	PE(38:6)>PE(18:2_20:4)_feature2	PE	0.369759	0.00969203
HEART	M2	blue	PG(40:8)>PG(18:2_22:6)_feature1	PG	0.351341	0.0143406
HEART	M2	blue	PE(37:4)>PE(17:0_20:4)_feature2	PE	0.345979	0.0160078
HEART	M2	blue	CL(74:11)_feature1	CL	0.334028	0.0203248
HEART	M2	blue	DG(34:0)>DG(16:0_18:0_0:0)_feature2	DAG	0.304106	0.0356039
HEART	M2	blue	PE(38:5)_feature3	PE	0.299154	0.0388724
HEART	M2	blue	PC(36:5)_feature2	PC	0.274575	0.0589392
HEART	M2	blue	PC(38:7)_feature1	PC	0.258956	0.0755248
HEART	M3	brown	TG(56:7)_feature5	TAG	0.934013	3.40951e-22
HEART	M3	brown	TG(58:9)_feature3	TAG	0.931772	7.17232e-22
HEART	M3	brown	TG(56:8)>TG(16:0_18:2_22:6)_feature5	TAG	0.920227	2.30427e-20
HEART	M3	brown	TG(56:5)>TG(16:0_18:1_22:4)_feature4	TAG	0.91718	5.27713e-20
HEART	M3	brown	TG(54:5)>TG(18:1_18:2_18:2)_and_TG(16:0_16:0_22:5)_and_TG(16:0_18:1_20:4)_feature5	TAG	0.915443	8.34679e-20
HEART	M3	brown	TG(56:7)_feature2	TAG	0.899819	3.47064e-18
HEART	M3	brown	TG(56:6)>TG(18:1_18:1_20:4)_and_TG(16:0_18:1_22:5)_and_TG(18:1_18:2_20:3)_feature3	TAG	0.898289	4.83579e-18
HEART	M3	brown	TG(58:6)_feature6	TAG	0.897197	6.10796e-18
HEART	M3	brown	TG(58:10)_feature2	TAG	0.889389	3.01645e-17
HEART	M3	brown	TG(58:8)>TG(18:2_18:2_22:4)_feature4	TAG	0.888572	3.54061e-17
HEART	M3	brown	TG(56:4)>TG(18:1_18:2_20:1)_and_TG(18:1_18:1_20:2)_feature2	TAG	0.882155	1.19493e-16
HEART	M3	brown	TG(52:4)>TG(16:0_16:0_20:4)_and_TG(16:1_18:1_18:2)_and_TG(16:0_18:1_18:2)_feature6	TAG	0.874949	4.31794e-16
HEART	M3	brown	TG(54:6)>TG(16:0_18:2_20:4)_feature5	TAG	0.874297	4.83106e-16
HEART	M3	brown	TG(58:8)>TG(18:0_20:4_20:4)_and_TG(18:0_18:2_22:6)_feature6	TAG	0.872066	7.06143e-16
HEART	M3	brown	TG(56:8)>TG(18:2_18:2_20:4)_feature3	TAG	0.870586	9.04887e-16
HEART	M3	brown	TG(58:7)>TG(18:0_18:1_22:6)_feature3	TAG	0.842307	6.19608e-14
HEART	M3	brown	TG(58:8)>TG(18:2_18:2_22:4)_feature1	TAG	0.835275	1.56008e-13
HEART	M3	brown	TG(56:5)>TG(16:0_18:1_22:4)_feature5	TAG	0.834417	1.74085e-13
HEART	M3	brown	TG(58:6)_feature3	TAG	0.827414	4.16653e-13
HEART	M3	brown	TG(54:6)>TG(16:0_16:0_22:6)_feature6	TAG	0.814052	1.98618e-12
HEART	M3	brown	TG(57:3)_feature1	TAG	0.799739	9.26504e-12
HEART	M3	brown	TG(56:7)>TG(16:0_18:1_22:6)_feature6	TAG	0.798099	1.09649e-11
HEART	M3	brown	DG(34:1)>DG(16:0_18:1_0:0)_feature2	DAG	0.796149	1.33717e-11
HEART	M3	brown	TG(57:4)_feature2	TAG	0.795985	1.3596e-11
HEART	M3	brown	TG(54:4)>TG(18:1_18:1_18:2)_and_TG(18:0_18:2_18:2)_feature3	TAG	0.78931	2.63772e-11
HEART	M3	brown	TG(58:8)_feature5	TAG	0.785343	3.86748e-11
HEART	M3	brown	TG(60:10)>TG(18:0_20:4_22:6)_feature4	TAG	0.783997	4.39563e-11
HEART	M3	brown	TG(58:6)_feature5	TAG	0.778874	7.09773e-11
HEART	M3	brown	PE(44:10)>PE(22:4_22:6)_feature2	PE	0.775302	9.83945e-11
HEART	M3	brown	TG(58:4)_feature5	TAG	0.770471	1.51622e-10
HEART	M3	brown	TG(55:1)>TG(18:0_18:1_19:0)_and_TG(16:0_18:1_21:0)_feature2	TAG	0.761609	3.26393e-10
HEART	M3	brown	DG(36:2)>DG(18:1_18:1_0:0)_feature3	DAG	0.754507	5.89367e-10
HEART	M3	brown	DG(36:4)>DG18:2_18:2_0:0)_feature1	DAG	0.750284	8.29813e-10
HEART	M3	brown	TG(58:10)_feature3	TAG	0.749325	8.95982e-10
HEART	M3	brown	TG(51:0)>TG(16:0_17:0_18:0)_and_TG(16:0_16:0_19:0)_and_TG(15:0_17:0_19:0)_feature2	TAG	0.741122	1.70386e-09
HEART	M3	brown	TG(58:3)>TG(18:1_20:1_20:1)_and_TG(18:1_18:1_22:1)_feature3	TAG	0.736326	2.4539e-09
HEART	M3	brown	DG(36:3)>DG(18:1_18:2_0:0)_feature3	DAG	0.722112	6.91907e-09
HEART	M3	brown	TG(58:11)_feature2	TAG	0.720502	7.75037e-09
HEART	M3	brown	TG(56:1)_feature2	TAG	0.7135	1.25798e-08
HEART	M3	brown	TG(60:4)_feature1	TAG	0.711866	1.40563e-08
HEART	M3	brown	TG(54:4)_feature6	TAG	0.69027	5.69299e-08
HEART	M3	brown	TG(58:2)_feature3	TAG	0.687992	6.5523e-08
HEART	M3	brown	PC(38:5)>PC(16:0_22:5)_and_PC(18:1_20:4)_feature4	PC	0.683576	8.57406e-08
HEART	M3	brown	LPC(20:4)_feature1and2	LPC	0.655621	4.24802e-07
HEART	M3	brown	PC(37:4)>PC(17:0_20:4)_feature3	PC	0.655306	4.32146e-07
HEART	M3	brown	TG(56:2)_feature3	TAG	0.644321	7.74789e-07
HEART	M3	brown	TG(60:3)_feature2	TAG	0.64269	8.43274e-07
HEART	M3	brown	PE(O-38:5)>PE(O-16:0/22:5)_feature3	O-PE	0.642636	8.45612e-07
HEART	M3	brown	TG(58:7)>TG(18:0_18:1_22:6)_feature5	TAG	0.634031	1.31135e-06
HEART	M3	brown	TG(58:1)>TG(16:0_18:1_24:0)_and_TG(16:0_16:0_26:1)_and_TG(18:0_18:1_22:0)_feature1	TAG	0.633635	1.33765e-06
HEART	M3	brown	TG(58:6)_feature2	TAG	0.623947	2.15627e-06
HEART	M3	brown	PE(O-36:5)>PE(O-16:1/20:4)_feature3	O-PE	0.613354	3.56913e-06
HEART	M3	brown	TG(57:2)_feature1	TAG	0.591327	9.61599e-06
HEART	M3	brown	DG(36:1)>DG(18:0_18:1_0:0)_feature2	DAG	0.589449	1.04286e-05
HEART	M3	brown	DG(34:2)>DG(16:0_18:2_0:0)_feature4	DAG	0.551129	4.91898e-05
HEART	M3	brown	DG(38:5)>DG(18:1_20:4_0:0)_feature2	DAG	0.546032	5.96147e-05
HEART	M3	brown	DG(38:3)>DG(18:2_20:1_0:0)_feature2	DAG	0.539442	7.60842e-05
HEART	M3	brown	PE(42:10)>PE(20:4_22:6)_feature1	PE	0.527198	0.000118145
HEART	M3	brown	PC(36:5)>PC(16:1_20:4)_feature2	PC	0.497473	0.000321455
HEART	M3	brown	TG(60:10)>TG(18:0_20:4_22:6)_feature5	TAG	0.489187	0.000418196
HEART	M3	brown	DG(38:4)>DG(16:0_22:4_0:0)_feature4	DAG	0.474826	0.000649655
HEART	M3	brown	PC(42:9)_feature1	PC	0.464618	0.000878395
HEART	M3	brown	PE(44:10)_feature2	PE	0.460805	0.000980818
HEART	M3	brown	TG(56:4)>TG(18:0_18:0_20:4)_feature6	TAG	0.455832	0.00113042
HEART	M3	brown	PE(O-38:5)_feature3	O-PE	0.438036	0.00184693
HEART	M3	brown	TG(56:6)>TG(18:0_16:0_22:6)_feature5	TAG	0.413602	0.00347718
HEART	M3	brown	PC(42:7)_feature1	PC	0.412246	0.00359662
HEART	M3	brown	DG(36:4)>DG(16:0_20:4_0:0)_feature2	DAG	0.383129	0.00719165
HEART	M3	brown	TG(58:11)_feature1	TAG	0.371837	0.0092602
HEART	M3	brown	SM(d43:1)_feature2	SM	0.359456	0.0120995
HEART	M3	brown	PC(38:4)>PC(18:0_20:4)_feature4	PC	0.359422	0.0121081
HEART	M3	brown	TG(58:6)>TG(18:0_18:0_22:6)_feature7	TAG	0.353345	0.0137564
HEART	M3	brown	DG(32:0)>DG(16:0_16:0_0:0)_feature2	DAG	0.337898	0.0188305
HEART	M3	brown	PI(40:6)>PI(18:0_22:6)_feature2	PI	0.331465	0.0213688
HEART	M3	brown	TG(56:10)>TG(18:2_18:3_20:5)_feature1	TAG	0.296376	0.0408121
HEART	M3	brown	DG(40:7)>DG(18:1_22:6_0:0)_feature3	DAG	0.283664	0.0507228
HEART	M3	brown	PC(38:4)_feature4	PC	0.153886	0.296352
HEART	M4	yellow	PE(O-38:6)>PE(O-18:2/20:4)_and_PE(O-16:1/22:5)_feature4	O-PE	0.93621	1.60237e-22
HEART	M4	yellow	PC(40:4)_feature2	PC	0.933711	3.7743e-22
HEART	M4	yellow	PC(42:9)_feature3	PC	0.919144	3.10459e-20
HEART	M4	yellow	PC(O-38:5)_feature2	O-PC	0.916334	6.60586e-20
HEART	M4	yellow	PC(38:4)_feature3	PC	0.915425	8.38528e-20
HEART	M4	yellow	PE(38:5)>PE(16:0_22:5)_and_PE(18:1_20:4)_feature5	PE	0.913518	1.37138e-19
HEART	M4	yellow	PC(40:5)_feature4	PC	0.913168	1.49922e-19
HEART	M4	yellow	PE(O-38:6)>PE(O-16:1/22:5)_feature3	O-PE	0.911725	2.15549e-19
HEART	M4	yellow	PE(O-40:6)>PE(O-18:1/22:5)_feature5	O-PE	0.902748	1.81134e-18
HEART	M4	yellow	PE(40:5)_feature5	PE	0.901029	2.65963e-18
HEART	M4	yellow	PE(40:5)>PE(18:0_22:5)_feature4	PE	0.900037	3.30886e-18
HEART	M4	yellow	PC(O-38:4)_feature4	O-PC	0.899397	3.80487e-18
HEART	M4	yellow	PC(40:4)>PC(18:0_22:4)_feature2	PC	0.898368	4.75403e-18
HEART	M4	yellow	PE(38:5)_feature5	PE	0.897196	6.10859e-18
HEART	M4	yellow	PC(38:4)>PC(16:0_22:4)_feature3	PC	0.890397	2.47108e-17
HEART	M4	yellow	PC(40:5)>PC(18:0_22:5)_feature4	PC	0.881406	1.37086e-16
HEART	M4	yellow	PC(O-40:6)_feature6	O-PC	0.827236	4.25785e-13
HEART	M4	yellow	PC(44:10)_feature1	PC	0.825647	5.16086e-13
HEART	M4	yellow	PC(O-36:3)_feature1	O-PC	0.824444	5.96251e-13
HEART	M4	yellow	CE(20:4)_feature1	CE	0.821543	8.40777e-13
HEART	M4	yellow	PC(O-38:6)_feature5	O-PC	0.819182	1.10713e-12
HEART	M4	yellow	PC(42:5)_feature3	PC	0.818954	1.13674e-12
HEART	M4	yellow	PC(38:5)_feature5	PC	0.816347	1.53253e-12
HEART	M4	yellow	PC(O-34:1)_feature2	O-PC	0.810352	2.99413e-12
HEART	M4	yellow	PE(O-40:4)>PE(O-18:0/22:4)_feature3	O-PE	0.807598	4.04095e-12
HEART	M4	yellow	PC(38:5)>PC(16:0_22:5)_and_PC(18:1_20:4)_feature5	PC	0.80677	4.41754e-12
HEART	M4	yellow	PC(O-38:4)_feature6	O-PC	0.802436	6.99808e-12
HEART	M4	yellow	PE(40:4)>PE(18:0_22:4)_feature2	PE	0.796196	1.33082e-11
HEART	M4	yellow	PC(36:0)_feature3	PC	0.793895	1.67736e-11
HEART	M4	yellow	CE(22:6)_feature2	CE	0.783901	4.43598e-11
HEART	M4	yellow	LPC(18:0)>LPC(18:0/0:0)_feature2	LPC	0.783672	4.5331e-11
HEART	M4	yellow	PC(O-36:4)_feature4	O-PC	0.775111	1.00109e-10
HEART	M4	yellow	PS(40:5)>PS(18:0_22:5)_feature5	PS	0.772157	1.30531e-10
HEART	M4	yellow	PE(36:0)>PE(18:0/18:0)_feature1	PE	0.754181	6.05309e-10
HEART	M4	yellow	PC(41:3)_feature1	PC	0.745474	1.21523e-09
HEART	M4	yellow	PC(O-34:0)_feature1	O-PC	0.744297	1.33244e-09
HEART	M4	yellow	PC(O-36:2)_feature1	O-PC	0.74375	1.39044e-09
HEART	M4	yellow	PE(O-40:5)>PE(O-18:1/22:4)_feature4	O-PE	0.737969	2.16747e-09
HEART	M4	yellow	LPE(20:0/0:0)_feature2	LPE	0.733668	2.99368e-09
HEART	M4	yellow	PE(38:4)>PE(16:0_22:4)_feature4	PE	0.724953	5.65328e-09
HEART	M4	yellow	PC(36:5)_feature4	PC	0.709089	1.69441e-08
HEART	M4	yellow	PC(42:10)>PC(20:4_22:6)_feature1	PC	0.70727	1.91285e-08
HEART	M4	yellow	PC(40:5)_feature1	PC	0.695325	4.14825e-08
HEART	M4	yellow	PE(O-38:5)>PE(O-16:1/22:4)_feature5	O-PE	0.648601	6.18864e-07
HEART	M4	yellow	PE(O-38:4)_feature4	O-PE	0.647143	6.68349e-07
HEART	M4	yellow	PC(O-38:5)_feature1	O-PC	0.640039	9.6671e-07
HEART	M4	yellow	PC(42:8)_feature2	PC	0.632725	1.39999e-06
HEART	M4	yellow	PG(40:6)>PG(18:0_22:6)_feature4	PG	0.623369	2.2175e-06
HEART	M4	yellow	PC(40:0)_feature1	PC	0.615606	3.21139e-06
HEART	M4	yellow	PE(38:4)>PE(18:0_20:4)_feature4	PE	0.607316	4.71816e-06
HEART	M4	yellow	PS(O-42:7)>PS(O-20:3/22:4)_feature1	O-PS	0.582627	1.39453e-05
HEART	M4	yellow	PE(O-40:6)>PE(O-18:2/22:4)_feature2	O-PE	0.576377	1.80952e-05
HEART	M4	yellow	PC(37:4)_feature4	PC	0.520787	0.000147768
HEART	M4	yellow	PC(32:0)>PC(16:0_16:0)_feature2	PC	0.51596	0.000174374
HEART	M4	yellow	PC(34:0)_feature4	PC	0.486194	0.000459141
HEART	M4	yellow	CL(76:12)_feature1	CL	0.478886	0.000574712
HEART	M4	yellow	PC(O-32:0)_feature1	O-PC	0.473363	0.00067875
HEART	M4	yellow	SM(d36:2)_feature1	SM	0.472972	0.000686725
HEART	M4	yellow	PE(42:10)_feature1	PE	0.436938	0.00190213
HEART	M4	yellow	SM(d36:1)_feature1	SM	0.434034	0.00205517
HEART	M4	yellow	PC(P-38:5)>PC(P-18:1/20:4)_feature2	O-PC	0.430709	0.00224375
HEART	M4	yellow	PC(42:9)_feature2	PC	0.4148	0.00337454
HEART	M4	yellow	PC(O-38:6)_feature1	O-PC	0.409622	0.00383799
HEART	M4	yellow	PC(O-40:6)_feature1	O-PC	0.404085	0.00439453
HEART	M4	yellow	PE(32:0)>PE(16:0/16:0)_feature1	PE	0.382514	0.00729291
HEART	M4	yellow	PE(O-38:7)>PE(O-16:1/22:6)_and_PE(O-20:7/18:0)_feature2	O-PE	0.380989	0.00754959
HEART	M4	yellow	PC(34:0)>PC(16:0_18:0)_feature3	PC	0.357429	0.0126291
HEART	M5	green	PC(O-38:7)_feature6	O-PC	0.932811	5.09631e-22
HEART	M5	green	PE(O-40:6)>PE(O-18:1/22:5)_feature4	O-PE	0.930564	1.0598e-21
HEART	M5	green	PE(38:6)_feature1	PE	0.905065	1.06734e-18
HEART	M5	green	PC(36:4)_feature1	PC	0.892968	1.47295e-17
HEART	M5	green	PE(40:5)>PE(18:0_22:5)_feature3	PE	0.891553	1.96136e-17
HEART	M5	green	PC(39:4)_feature4	PC	0.875217	4.12248e-16
HEART	M5	green	Cer(d43:1)>Cer(d18:1/25:0)_feature1	Cer	0.872983	6.0466e-16
HEART	M5	green	PE(O-39:7)>PE(O-21:7/18:0)_and_PE(O-17:1/22:6)_feature1	O-PE	0.866127	1.87592e-15
HEART	M5	green	PC(32:0)_feature1	PC	0.861799	3.71451e-15
HEART	M5	green	PE(O-39:5)_feature3	O-PE	0.843618	5.1905e-14
HEART	M5	green	TG(60:10)>TG(18:0_20:4_22:6)_feature3	TAG	0.838781	9.89854e-14
HEART	M5	green	PC(36:3)_feature1	PC	0.829625	3.17656e-13
HEART	M5	green	TG(58:9)_feature2	TAG	0.819119	1.11519e-12
HEART	M5	green	PC(37:4)_feature2	PC	0.814718	1.84287e-12
HEART	M5	green	SM(d43:1)_feature1and2	SM	0.806765	4.42031e-12
HEART	M5	green	PE(39:4)>PE(19:0_20:4)_feature2	PE	0.804379	5.70218e-12
HEART	M5	green	PC(34:4)>PC(14:0_20:4)_feature2	PC	0.799868	9.14198e-12
HEART	M5	green	PE(40:5)_feature3	PE	0.788005	2.99405e-11
HEART	M5	green	PE(40:5)_feature4	PE	0.779273	6.84056e-11
HEART	M5	green	PC(38:5)_feature1	PC	0.775638	9.54375e-11
HEART	M5	green	PE(O-34:5)>PE(O-17:1/20:4)_feature1	O-PE	0.775609	9.5688e-11
HEART	M5	green	PE(40:7)>PE(18:2_22:5)_feature1	PE	0.77128	1.4113e-10
HEART	M5	green	PC(37:6)_feature6	PC	0.769599	1.63744e-10
HEART	M5	green	PC(37:1)_feature2	PC	0.761131	3.39843e-10
HEART	M5	green	PI(40:5)>PI(18:0_22:5)_feature1	PI	0.745344	1.22767e-09
HEART	M5	green	LPC(19:0)>LPC(0:0/19:0)_feature1	LPC	0.737593	2.23021e-09
HEART	M5	green	PC(35:0)_feature2	PC	0.728498	4.37773e-09
HEART	M5	green	PE(O-37:5)>PE(O-17:1/20:4)_feature1	O-PE	0.727279	4.7824e-09
HEART	M5	green	PC(35:4)>PC(15:0_20:4)_feature2	PC	0.708185	1.79987e-08
HEART	M5	green	PC(35:4)_feature4	PC	0.706279	2.04267e-08
HEART	M5	green	PE(42:10)_feature2	PE	0.698683	3.34972e-08
HEART	M5	green	PE(38:5)>PE(16:0_22:5)_and_PE(18:1_20:4)_feature3	PE	0.689996	5.79031e-08
HEART	M5	green	PE(O-40:7)>PE(O-18:2/22:5)_feature4	O-PE	0.685877	7.45706e-08
HEART	M5	green	SM(d38:4)_feature2	SM	0.677	1.26884e-07
HEART	M5	green	PE(O-38:6)>PE(O-18:2/20:4)_and_PE(O-16:1/22:5)_feature2	O-PE	0.670135	1.89043e-07
HEART	M5	green	PS(40:5)>PS(18:0_22:5)_feature2	PS	0.665705	2.4318e-07
HEART	M5	green	PC(34:4)_feature2	PC	0.647595	6.52618e-07
HEART	M5	green	PC(36:5)_feature6	PC	0.646856	6.78527e-07
HEART	M5	green	Ubiquinol Q10_feature1	Ubiquinones	0.645125	7.42951e-07
HEART	M5	green	SM(d33:1)_feature1	SM	0.639679	9.8471e-07
HEART	M5	green	PC(39:5)_feature3	PC	0.63462	1.27309e-06
HEART	M5	green	PS(40:5)_feature3	PS	0.633493	1.34717e-06
HEART	M5	green	PI(36:2)>PI(18:0_18:2)_feature2	PI	0.592159	9.27499e-06
HEART	M5	green	PC(33:0)_feature2	PC	0.582846	1.38167e-05
HEART	M5	green	PC(40:5)>PC(18:0_22:5)_feature3	PC	0.580532	1.52267e-05
HEART	M5	green	PE(O-34:1)>PE(O-18:1_16:0)_feature2	O-PE	0.573233	2.05875e-05
HEART	M5	green	Ubiquinol Q9_feature1	Ubiquinones	0.544337	6.35048e-05
HEART	M5	green	PC(41:6)_feature1	PC	0.537785	8.08356e-05
HEART	M5	green	TG(54:3)>TG(18:1/18:1/18:1)_feature5	TAG	0.536961	8.32946e-05
HEART	M5	green	PE(38:5)>PE(18:1_20:4)_feature3	PE	0.533883	9.3108e-05
HEART	M5	green	PC(41:6)_feature2	PC	0.529966	0.000107114
HEART	M5	green	PC(38:5)_feature3	PC	0.503523	0.00026415
HEART	M5	green	DG(36:2)>DG(18:0_18:2_0:0)_feature4	DAG	0.488851	0.000422617
HEART	M5	green	Car(5:0)_feature1	Car	0.471597	0.00071543
HEART	M5	green	PE(O-34:5)>PE(O-17:1/20:4)_feature2	O-PE	0.406117	0.00418254
HEART	M5	green	PC(39:4)>PC(19:0_20:4)_feature5	PC	0.371976	0.00923189
HEART	M5	green	PI(36:3)>PI(18:1_18:2)_feature1	PI	0.355305	0.013205
HEART	M5	green	PC(37:4)_feature3	PC	0.352664	0.0139526
HEART	M5	green	PE(O-38:5)>PE(O-18:1/20:4)_feature6	O-PE	0.334543	0.0201206
HEART	M5	green	13-HpODE	Oxylipin	0.252854	0.082928
HEART	M6	red	TG(51:2)_feature2	TAG	0.984615	1.67711e-36
HEART	M6	red	TG(54:5)>TG(18:1_18:2_18:2)_feature4	TAG	0.984569	1.79588e-36
HEART	M6	red	TG(53:3)>TG(17:0_18:1_18:2)_and_TG(17:1_18:1_18:1)_and_TG(16:1_18:1_19:1)_and_TG(16:0_18:1_19:2)_feature5	TAG	0.983849	5.08791e-36
HEART	M6	red	TG(52:3)>TG(16:0_18:1_18:2)_feature3	TAG	0.979116	1.78552e-33
HEART	M6	red	TG(49:1)>TG(15:0_16:0_18:0)_and_TG(16:0_16:0_17:1)_and_>TG(16:0_16:1_17:0)_feature1	TAG	0.978603	3.10009e-33
HEART	M6	red	TG(51:3)>TG(15:0_18:1_18:2)_and_TG(16:0_17:1_18:2)_and_TG(16:1_17:1_18:1)_feature3	TAG	0.978296	4.28934e-33
HEART	M6	red	TG(52:4)>TG(16:1_18:1_18:2)_feature5	TAG	0.977389	1.08938e-32
HEART	M6	red	TG(54:6)>TG(18:2/18:2/18:2)_and_TG(18:1_18:2_18:3)_feature4	TAG	0.973471	4.12359e-31
HEART	M6	red	TG(52:1)>TG(16:0_18:0_18:1)_and_TG(16:0_16:0_20:1)_feature3	TAG	0.968368	2.2339e-29
HEART	M6	red	TG(50:1)>TG(16:0_16:0_18:1)_feature4	TAG	0.967118	5.37341e-29
HEART	M6	red	TG(54:3)>TG(18:0_18:1_18:2)_and_TG(18:1/18:1/18:1)_and_TG(16:0_18:2_20:1)_feature9	TAG	0.966056	1.10338e-28
HEART	M6	red	TG(54:4)>TG(18:1_18:1_18:2)_feature4	TAG	0.96596	1.17631e-28
HEART	M6	red	TG(51:4)>TG(16:1_17:1_18:2)_and_TG(15:0_18:2_18:2)_and_TG(15:1_18:1_18:2)_feature1	TAG	0.962152	1.29426e-27
HEART	M6	red	TG(50:2)>TG(16:0_16:1_18:1)_and_TG(14:0_18:1_18:1)_feature3	TAG	0.956321	3.2824e-26
HEART	M6	red	TG(54:2)>TG(16:0_18:1_20:1)_and_TG(18:0_18:1_18:1)_feature3	TAG	0.95054	5.37897e-25
HEART	M6	red	TG(53:3)>TG(17:0_18:1_18:2)_and_TG(17:1_18:1_18:1)_and_TG(16:1_18:1_19:1)_and_TG(16:0_18:1_19:2)_feature4	TAG	0.94817	1.53817e-24
HEART	M6	red	TG(53:2)_feature4	TAG	0.945098	5.59445e-24
HEART	M6	red	TG(49:2)_feature3	TAG	0.933986	3.43994e-22
HEART	M6	red	TG(52:2)>TG(16:0_18:1_18:1)_and_TG(16:0_18:0_18:2)_feature5	TAG	0.918634	3.56744e-20
HEART	M6	red	TG(48:0)>TG(16:0/16:0/16:0)_and_TG(14:0_16:0_18:0)_feature1	TAG	0.918197	4.01653e-20
HEART	M6	red	TG(50:0)>TG(16:0_16:0_18:0)_feature3	TAG	0.911836	2.09687e-19
HEART	M6	red	TG(53:4)>TG(17:0_18:2_18:2)_and_TG(17:1_18:1_18:2)_feature3	TAG	0.911662	2.18955e-19
HEART	M6	red	TG(49:0)>TG(16:0_16:0_17:0)_and_TG(15:0_16:0_18:0)_and_TG(14:0_16:0_19:0)_feature1	TAG	0.908054	5.28425e-19
HEART	M6	red	TG(54:3)>TG(18:1/18:1/18:1)_feature8	TAG	0.907284	6.34751e-19
HEART	M6	red	TG(55:4)>TG(18:1_18:2_19:1)_and_TG(18:2_18:2_19:0)_and_TG(18:1_18:1_19:2)_feature2	TAG	0.905279	1.01567e-18
HEART	M6	red	TG(53:5)>TG(17:1_18:2_18:2)_feature1	TAG	0.901221	2.54885e-18
HEART	M6	red	TG(56:4)>TG(18:1_18:2_20:1)_and_TG(18:1_18:1_20:2)_feature4	TAG	0.894759	1.01911e-17
HEART	M6	red	TG(53:3)>TG(17:0_18:1_18:2)_and_TG(17:1_18:1_18:1)_and_TG(16:1_18:1_19:1)_and_TG(16:0_18:1_19:2)_feature3	TAG	0.894497	1.07596e-17
HEART	M6	red	TG(51:2)_feature3	TAG	0.893095	1.43527e-17
HEART	M6	red	TG(56:5)>TG(16:0_18:1_22:4)_feature1	TAG	0.889151	3.16124e-17
HEART	M6	red	TG(53:4)>TG(17:0_18:2_18:2)_and_TG(17:1_18:1_18:2)_feature2	TAG	0.868514	1.27408e-15
HEART	M6	red	TG(55:3)>TG(18:1_18:1_19:1)_and_TG(18:1_18:2_19:0)_feature3	TAG	0.867384	1.53157e-15
HEART	M6	red	TG(54:6)>TG(18:2/18:2/18:2)_and_TG(18:1_18:2_18:3)_feature1	TAG	0.854647	1.09372e-14
HEART	M6	red	TG(52:0)>TG(16:0_16:0_20:0)_feature3	TAG	0.848604	2.60675e-14
HEART	M6	red	TG(56:3)>TG(18:1_18:1_20:1)_feature3	TAG	0.844769	4.43711e-14
HEART	M6	red	TG(56:5)>TG(16:0_18:1_22:4)_feature3	TAG	0.843052	5.60397e-14
HEART	M6	red	TG(53:2)_feature1	TAG	0.835192	1.57675e-13
HEART	M6	red	TG(54:8)_feature1	TAG	0.82301	7.07188e-13
HEART	M6	red	TG(55:5)>TG(18:2_18:2_19:1)_and_TG(18:1_18:2_19:2)_feature2	TAG	0.818041	1.26281e-12
HEART	M6	red	TG(48:4)>TG(12:0_18:2_18:2)_and_TG(14:1_16:1_18:2)_feature2	TAG	0.778214	7.54244e-11
HEART	M6	red	TG(52:1)_feature1	TAG	0.751422	7.57211e-10
HEART	M6	red	TG(52:6)_feature4	TAG	0.73406	2.9076e-09
HEART	M6	red	TG(54:6)>TG(18:2/18:2/18:2)_feature3	TAG	0.70619	2.05482e-08
HEART	M6	red	TG(56:7)_feature3	TAG	0.697038	3.72091e-08
HEART	M6	red	TG(56:8)>TG(18:2_18:2_20:4)_feature1	TAG	0.688863	6.21019e-08
HEART	M6	red	TG(50:4)>TG(16:1_16:1_18:2)_and_TG(16:1_16:1_18:2)_feature3	TAG	0.675002	1.42651e-07
HEART	M6	red	TG(54:7)>TG(16:0_16:1_22:6)_and_TG(16:0_18:2_20:5)_feature4	TAG	0.525162	0.000126906
HEART	M6	red	TG(58:5)_feature6	TAG	0.518718	0.000158684
HEART	M6	red	SM(d34:1)_feature1	SM	0.500299	0.000293417
HEART	M6	red	PS(O-40:7)>PS(O-18:3/22:4)_feature1	O-PS	0.460576	0.000987282
HEART	M6	red	Cer(d34:1)_feature1	Cer	0.45436	0.00117847
HEART	M6	red	CL(74:10)_feature1	CL	0.36999	0.00964315
HEART	M6	red	TG(54:1)>TG(18:0_18:0_18:1)_and_TG(16:1_18:0_20:0)_and_TG(16:0_18:0_20:1)_feature3	TAG	0.222898	0.127807
HEART	M7	black	Car(18:0)_feature1	Car	0.933053	4.70237e-22
HEART	M7	black	Car(16:2)_feature1	Car	0.931427	8.02508e-22
HEART	M7	black	Car(16:1)_feature2	Car	0.930953	9.35364e-22
HEART	M7	black	Car(14:0)_feature1	Car	0.927067	3.15861e-21
HEART	M7	black	Car(16:1)_feature1	Car	0.925264	5.43101e-21
HEART	M7	black	Car(18:0-OH)_feature1	Car	0.913552	1.35935e-19
HEART	M7	black	Car(14:1-OH)_feature1	Car	0.913459	1.39212e-19
HEART	M7	black	Car(18:1)_feature1	Car	0.908659	4.5702e-19
HEART	M7	black	Car(16:0)_feature1	Car	0.906054	8.4808e-19
HEART	M7	black	Car(10:0)_feature1	Car	0.90539	9.89941e-19
HEART	M7	black	Car(18:3)_feature1	Car	0.904351	1.25798e-18
HEART	M7	black	Car(12:0)_feature2	Car	0.899336	3.85559e-18
HEART	M7	black	Car(12:1)_feature1	Car	0.896258	7.44961e-18
HEART	M7	black	Car(20:2)_feature1	Car	0.894329	1.11421e-17
HEART	M7	black	Car(16:0-OH)_feature1	Car	0.880996	1.47724e-16
HEART	M7	black	Car(14:2)_feature1	Car	0.87989	1.80514e-16
HEART	M7	black	Car(18:2)_feature1	Car	0.874483	4.67891e-16
HEART	M7	black	Car(13:0)_feature1	Car	0.867381	1.53244e-15
HEART	M7	black	Car(16:2-OH)_feature1	Car	0.86627	1.83336e-15
HEART	M7	black	Car(14:1)_feature1	Car	0.865005	2.24463e-15
HEART	M7	black	Car(18:1-OH)_feature1	Car	0.843157	5.52446e-14
HEART	M7	black	Car(15:0)_feature2	Car	0.837334	1.1958e-13
HEART	M7	black	Car(8:0)_feature1	Car	0.818248	1.23305e-12
HEART	M7	black	Car(20:1)_feature1	Car	0.815401	1.70626e-12
HEART	M7	black	Car(12:0-OH)_feature1	Car	0.80729	4.17736e-12
HEART	M7	black	Car(22:4)_feature1	Car	0.797154	1.20748e-11
HEART	M7	black	Car(10:0-OH)_feature1	Car	0.792567	1.91464e-11
HEART	M7	black	Car(14:2-OH)_feature1	Car	0.765373	2.36625e-10
HEART	M7	black	Car(19:0)_feature1	Car	0.744354	1.32646e-09
HEART	M7	black	Car(14:0-OH)_feature1	Car	0.721572	7.18807e-09
HEART	M7	black	Car(16:3)_feature1	Car	0.691852	5.15948e-08
HEART	M7	black	Car(4:0)_feature1	Car	0.666445	2.33238e-07
HEART	M7	black	Car(20:4)_feature1	Car	0.604891	5.26916e-06
HEART	M7	black	Car(2:0)_feature1	Car	0.601096	6.25254e-06
HEART	M7	black	Car(6:0)_feature1	Car	0.591616	9.49632e-06
HEART	M7	black	LPC(22:5)>LPC(22:5/0:0)_and_LPC(0:0/22:5)_feature1and2	LPC	0.437873	0.00185505
HEART	M7	black	Car(3:0)_feature1	Car	0.433853	0.00206509
HEART	M7	black	PE(42:8)>PE(20:4_22:4)_feature4	PE	0.331308	0.0214339
HEART	M8	pink	TG(46:2)_feature2	TAG	0.99149	2.19162e-42
HEART	M8	pink	TG(48:2)>TG(14:0_16:0_18:2)_and_TG(14:0_16:1_18:1)_feature3	TAG	0.982943	1.76739e-35
HEART	M8	pink	TG(50:3)_feature1	TAG	0.975139	9.42806e-32
HEART	M8	pink	TG(50:3)_feature3	TAG	0.974905	1.16589e-31
HEART	M8	pink	TG(46:1)>TG(12:0_16:0_18:1)_and_TG(10:0_18:0_18:1)_and_TG(14:0_16:0_16:1)_feature2	TAG	0.970692	3.95893e-30
HEART	M8	pink	TG(51:2)>TG(15:0_18:1_18:1)_and_TG(16:0_17:1_18:1)_and_TG(16:1_17:0_18:1)_feature2	TAG	0.960131	4.19112e-27
HEART	M8	pink	TG(48:3)_feature2	TAG	0.956229	3.44068e-26
HEART	M8	pink	TG(48:4)>TG(12:0_18:2_18:2)_feature2	TAG	0.953548	1.31244e-25
HEART	M8	pink	TG(52:5)>TG(16:0_18:2_18:3)_feature5	TAG	0.951064	4.23386e-25
HEART	M8	pink	SM(d42:0)_feature2	SM	0.949623	8.12713e-25
HEART	M8	pink	TG(48:1)>TG(16:0_16:0_16:1)_and_TG(14:0_16:0_18:1)_feature3	TAG	0.948553	1.30241e-24
HEART	M8	pink	TG(44:2)>TG(10:0_16:1_18:1)_feature2	TAG	0.947595	1.97091e-24
HEART	M8	pink	TG(44:3)>TG(10:1_16:0_18:2)_and_TG(10:0_16:0_18:3)_feature2	TAG	0.944488	7.16701e-24
HEART	M8	pink	TG(44:3)>TG(10:1_16:0_18:2)_and_TG(10:0_16:0_18:3)_feature1	TAG	0.942325	1.68618e-23
HEART	M8	pink	TG(46:3)>TG(10:0_18:1_18:2)_and_TG(12:0_16:1_18:2)_feature1	TAG	0.942082	1.85254e-23
HEART	M8	pink	TG(52:6)>TG(16:1_18:2_18:3)_and_TG(16:2_18:2_18:2)_feature2	TAG	0.932232	6.17028e-22
HEART	M8	pink	TG(54:5)>TG(18:1_18:2_18:2)_and_TG(16:0_16:0_22:5)_and_TG(16:0_18:1_20:4)_feature1	TAG	0.926696	3.53498e-21
HEART	M8	pink	TG(46:0)>TG(14:0_16:0_16:0)_and_TG(12:0_16:0_18:0)_feature1	TAG	0.919984	2.46455e-20
HEART	M8	pink	TG(54:7)>TG(18:2_18:2_18:3)_feature2	TAG	0.891811	1.86234e-17
HEART	M8	pink	TG(49:3)_feature2	TAG	0.868327	1.3136e-15
HEART	M8	pink	TG(36:1)>TG(4:0_16:0_16:1)_and_TG(2:0_16:0_18:1)_feature4	TAG	0.860255	4.71358e-15
HEART	M8	pink	TG(36:2)>TG(2:0_16:0_18:2)_feature3	TAG	0.854457	1.12463e-14
HEART	M8	pink	TG(38:1)>TG(4:0_16:0_18:1)_feature2	TAG	0.822991	7.08844e-13
HEART	M8	pink	TG(40:3)>TG(4:0_18:1_18:2)_feature2	TAG	0.817413	1.35718e-12
HEART	M8	pink	TG(38:2)>TG(4:0_16:1_18:1)_and_TG(4:0_16:0_18:2)_feature3	TAG	0.809921	3.13904e-12
HEART	M8	pink	TG(54:4)>TG(18:1_18:1_18:2)_feature2	TAG	0.785343	3.86731e-11
HEART	M8	pink	TG(50:5)_feature2	TAG	0.773545	1.15284e-10
HEART	M8	pink	TG(52:5)>TG(16:1_18:2_18:2)_feature3	TAG	0.618829	2.75707e-06
HEART	M8	pink	PS(36:1)>PS(18:0_18:1)_feature1	PS	0.493022	0.000370559
HEART	M8	pink	PS(40:4)>PS(18:0_22:4)_feature1	PS	0.32426	0.0245472
HEART	M8	pink	PI(36:4)>PI(16:0_20:4)_feature1	PI	0.295407	0.0415068
HEART	M8	pink	EA(15:0)_feature1	Fatty amides	0.254765	0.0805505
HEART	M8	pink	PC(32:1)>PC(14:0_18:1)_and_PC(16:0_16:1)_feature2	PC	0.24056	0.0995577
HEART	M9	magenta	PC(38:2)_feature5	PC	0.896521	7.04894e-18
HEART	M9	magenta	PE(36:1)_feature3	PE	0.887293	4.538e-17
HEART	M9	magenta	PC(36:1)_feature1	PC	0.862404	3.38102e-15
HEART	M9	magenta	SM(d37:1)_feature1	SM	0.83443	1.73803e-13
HEART	M9	magenta	PE(O-34:2)>PE(O-16:1/18:1)_and_PE(O-18:2/16:0)_feature1	O-PE	0.824714	5.77279e-13
HEART	M9	magenta	SM(d43:2)_feature2	SM	0.789124	2.68589e-11
HEART	M9	magenta	PC(34:1)_feature2	PC	0.778139	7.5943e-11
HEART	M9	magenta	LPE(16:0)>LPE(16:0/0:0)_feature2	LPE	0.740208	1.82755e-09
HEART	M9	magenta	PC(40:4)_feature3	PC	0.704393	2.313e-08
HEART	M9	magenta	PE(O-38:5)_feature1	O-PE	0.687605	6.70974e-08
HEART	M9	magenta	Cer(d36:1)_feature1	Cer	0.68197	9.44414e-08
HEART	M9	magenta	PE(36:4)_feature3	PE	0.673062	1.59695e-07
HEART	M9	magenta	PC(38:6)_feature1	PC	0.663619	2.73397e-07
HEART	M9	magenta	PE(36:1)>PE(18:0_18:1)_feature3	PE	0.651141	5.40694e-07
HEART	M9	magenta	SM(d32:1)_feature1	SM	0.625439	2.00554e-06
HEART	M9	magenta	PE(38:4)>PE(18:0_20:4)_feature5	PE	0.619397	2.68349e-06
HEART	M9	magenta	PC(33:0)_feature3	PC	0.592693	9.06199e-06
HEART	M9	magenta	LPC(18:1)>LPC(0:0/18:1)_feature1	LPC	0.563324	3.06564e-05
HEART	M9	magenta	PC(38:2)>PC(18:0_20:2)_feature4	PC	0.55241	4.68459e-05
HEART	M9	magenta	PE(O-34:1)_feature1	O-PE	0.526935	0.000119244
HEART	M9	magenta	Cer(d38:1)_feature1	Cer	0.487159	0.000445565
HEART	M9	magenta	PC(39:4)_feature5	PC	0.439221	0.00178897
HEART	NA	grey	PI(36:3)_feature1	PI	-0.744133	1.34954e-09
HEART	NA	grey	EA(18:0)_feature1	Fatty amides	0.663797	2.70693e-07
HEART	NA	grey	EA(17:0)_feature1	Fatty amides	0.663166	2.8041e-07
HEART	NA	grey	EA(22:0)_feature1	Fatty amides	0.632217	1.43598e-06
HEART	NA	grey	PE(40:6)_feature3	PE	0.608508	4.46721e-06
HEART	NA	grey	PE(40:4)>PE(18:0_22:4)_feature1	PE	0.588267	1.09723e-05
HEART	NA	grey	PE(O-39:7)>PE(O-21:7/18:0)_and_PE(O-17:1/22:6)_feature2	O-PE	0.578398	1.6643e-05
HEART	NA	grey	PI(38:5)>PI(18:1_20:4)_feature1	PI	-0.573278	2.05497e-05
HEART	NA	grey	TG(54:3)>TG(18:1/18:1/18:1)_feature7	TAG	0.563707	3.01948e-05
HEART	NA	grey	PI(38:4)>PI(18:0_20:4)_feature2	PI	-0.544665	6.27342e-05
HEART	NA	grey	Cer(d36:1)>Cer(d18:1/18:0)_feature1	Cer	0.541323	7.10057e-05
HEART	NA	grey	CL(72:6)_feature1	CL	-0.539634	7.55527e-05
HEART	NA	grey	PC(39:6)_feature6	PC	0.538314	7.92888e-05
HEART	NA	grey	PS(40:4)_feature1	PS	-0.53627	8.54128e-05
HEART	NA	grey	PC(36:4)_feature3	PC	0.510317	0.000210951
HEART	NA	grey	PC(O-36:5)_feature5	O-PC	-0.49715	0.000324819
HEART	NA	grey	PI(34:2)>PI(16:0_18:2)_feature1	PI	-0.496834	0.000328125
HEART	NA	grey	DG(40:4)>DG(18:0_22:4_0:0)_feature3	DAG	-0.47275	0.000691283
HEART	NA	grey	PE(O-37:5)>PE(O-17:1/20:4)_feature2	O-PE	-0.453119	0.00122037
HEART	NA	grey	erucamide_feature1	Fatty amines	0.424903	0.00260998
HEART	NA	grey	PA(34:1)_feature1	PA	-0.420995	0.00288537
HEART	NA	grey	TG(54:5)>TG(18:1_18:2_18:2)_and_TG(16:0_16:0_22:5)_and_TG(16:0_18:1_20:4)_feature3	TAG	0.375763	0.00848917
HEART	NA	grey	LPE(O-15:0)_feature1	O-LPE	0.367244	0.0102381
HEART	NA	grey	SM(d40:2)_feature1	SM	0.367172	0.0102541
HEART	NA	grey	cholesterol_feature1	Sterols	0.367003	0.0102916
HEART	NA	grey	PE(36:4)>PE(16:0_20:4)_feature5	PE	0.366717	0.0103557
HEART	NA	grey	Cer(d42:0)>Cer(d18:0/24:0)_feature1	DHCer	-0.350241	0.0146698
HEART	NA	grey	SM(d40:0-OH)_feature1	SM	0.34021	0.017983
HEART	NA	grey	Cer(d43:1)>Cer(d18:1/25:0)_feature2	Cer	0.312552	0.0305528
HEART	NA	grey	11,12-EpETrE	Oxylipin	0.308167	0.0330953
HEART	NA	grey	PC(36:4)>PC(16:0_20:4)_feature3	PC	-0.305193	0.0349175
HEART	NA	grey	adenosine_feature1	Purines	0.304669	0.0352468
HEART	NA	grey	PE(O-38:7)>PE(O-18:3/20:4)_feature1	O-PE	-0.29747	0.040039
HEART	NA	grey	PG(36:4)>PG(16:0_20:4)_feature3	PG	-0.259525	0.0748628
HEART	NA	grey	SM(d38:2)_feature1	SM	0.257919	0.0767445
HEART	NA	grey	PC(39:5)_feature10	PC	0.251747	0.0843292
HEART	NA	grey	Coenzyme Q10_feature1	Ubiquinones	0.247176	0.0903148
HEART	NA	grey	Coenzyme Q9_feature1	Ubiquinones	0.230509	0.114974
HEART	NA	grey	PS(38:4)>PS(18:0_20:4)_feature2	PS	-0.223475	0.126798
HEART	NA	grey	PE(36:4)>(16:0_20:4)_feature3	PE	-0.221909	0.129551
HEART	NA	grey	PC(O-33:0)_feature1	O-PC	0.218798	0.135153
HEART	NA	grey	9-HODE	Oxylipin	0.203804	0.164709
HEART	NA	grey	PC(O-40:9)>PC(O:20:5/20:4)_feature1	O-PC	0.197429	0.178607
HEART	NA	grey	DG(38:4)>DG(18:0_20:4_0:0)_feature6	DAG	-0.192962	0.188837
HEART	NA	grey	Cer(d34:1)>Cer(d18:1/16:0)_feature1	Cer	0.191922	0.191276
HEART	NA	grey	Linoleoyl-EA	NAE	0.184833	0.208509
HEART	NA	grey	PC(O-36:5)>PC(O-16:1/20:4)_feature5	O-PC	-0.182567	0.21424
HEART	NA	grey	carnitine_feature1	Carnitines	-0.17744	0.22761
HEART	NA	grey	13-HODE	Oxylipin	0.17364	0.237882
HEART	NA	grey	Resolvin E1	Oxylipin	-0.171459	0.243919
HEART	NA	grey	14,15-EpETrE	Oxylipin	0.165396	0.261247
HEART	NA	grey	PE(36:5)_feature2	PE	-0.114886	0.436833
HEART	NA	grey	12-HETE	Oxylipin	0.112588	0.446122
HEART	NA	grey	PE(40:7)>PE(18:1_22:6)_and_PE(18:0_22:7)_feature3	PE	0.101096	0.494161
HEART	NA	grey	Car(4:0-OH)_feature1	Car	0.0866381	0.558193
HEART	NA	grey	9-HETE	Oxylipin	0.085797	0.562035
HEART	NA	grey	20-HETE	Oxylipin	-0.0701942	0.635439
HEART	NA	grey	PE(40:7)_feature3	PE	0.0671958	0.649981
HEART	NA	grey	PC(O-37:5)_feature2	O-PC	0.0668086	0.651869
HEART	NA	grey	8,9-DiHETrE	Oxylipin	0.0464777	0.753757
HEART	NA	grey	PC(38:7)_feature3	PC	0.0454608	0.758982
HEART	NA	grey	9S-HpODE	Oxylipin	-0.0433132	0.77005
HEART	NA	grey	11,12-DiHETrE	Oxylipin	0.0326423	0.825677
HEART	NA	grey	PC(40:5)_feature3	PC	0.0288964	0.845421
HEART	NA	grey	PE(40:5)_feature1	PE	-0.0173794	0.906667
HEART	NA	grey	5,6-DiHETrE	Oxylipin	0.016276	0.912569
HEART	NA	grey	Cer(d42:2)_feature4	Cer	0.00113654	0.993883
HIPPOC	M1	turquoise	PE(40:8)>PE(18:2_22:6)_feature1	PE	0.897325	3.11821e-17
HIPPOC	M1	turquoise	PE(40:7)>PE(18:1_22:6)_and_PE(18:0_22:7)_feature3	PE	0.885144	3.22914e-16
HIPPOC	M1	turquoise	PC(42:10)>PC(20:4_22:6)_feature1	PC	0.877228	1.28649e-15
HIPPOC	M1	turquoise	PE(42:10)>PE(20:4_22:6)_feature1	PE	0.873232	2.49429e-15
HIPPOC	M1	turquoise	PE(40:6)>PE(18:0_22:6)_feature2	PE	0.87136	3.37531e-15
HIPPOC	M1	turquoise	TG(56:7)>TG(16:0_18:1_22:6)_feature6	TAG	0.868294	5.48475e-15
HIPPOC	M1	turquoise	PE(36:5)>PE(16:1_20:4)_feature2	PE	0.861295	1.58974e-14
HIPPOC	M1	turquoise	PE(38:4)>PE(18:0_20:4)_feature5	PE	0.858721	2.31747e-14
HIPPOC	M1	turquoise	PE(38:6)>PE(16:0_22:6)_feature3	PE	0.855305	3.77842e-14
HIPPOC	M1	turquoise	PC(38:6)>PC(18:2_20:4)_feature1	PC	0.842304	2.18009e-13
HIPPOC	M1	turquoise	PG(36:4)_feature3	PG	0.834324	5.92322e-13
HIPPOC	M1	turquoise	PG(44:12)>PG(22:6/22:6)_feature1	PG	0.827513	1.33437e-12
HIPPOC	M1	turquoise	PE(O-38:5)>PE(O-18:1/20:4)_feature6	O-PE	0.826305	1.53544e-12
HIPPOC	M1	turquoise	PE(38:7)>PE(16:1_22:6)_feature1	PE	0.823615	2.09097e-12
HIPPOC	M1	turquoise	TG(58:10)_feature3	TAG	0.817742	4.03089e-12
HIPPOC	M1	turquoise	TG(54:6)>TG(16:0_16:0_22:6)_feature6	TAG	0.801893	2.12009e-11
HIPPOC	M1	turquoise	PC(40:6)>PC(18:0_22:6)_feature3	PC	0.799084	2.80169e-11
HIPPOC	M1	turquoise	PC(38:6)>PC(16:0_22:6)_and_PC(18:0_20:6)_feature2	PC	0.795023	4.15969e-11
HIPPOC	M1	turquoise	PG(42:10)>PG(20:4_22:6)_feature1	PG	0.786563	9.21958e-11
HIPPOC	M1	turquoise	PC(34:4)_feature2	PC	0.78458	1.10525e-10
HIPPOC	M1	turquoise	PE(O-40:7)>PE(O-18:1/22:6)_and_PE(O-22:7/18:0)_feature10	O-PE	0.784519	1.11148e-10
HIPPOC	M1	turquoise	PE(44:12)>PE(22:6/22:6)_feature1	PE	0.779503	1.74368e-10
HIPPOC	M1	turquoise	PC(40:4)>PC(18:0_22:4)_feature2	PC	0.77229	3.26566e-10
HIPPOC	M1	turquoise	PG(38:4)>PG(18:0_20:4)_feature1	PG	0.770932	3.66583e-10
HIPPOC	M1	turquoise	PG(36:4)>PG(16:0_20:4)_feature3	PG	0.768939	4.33722e-10
HIPPOC	M1	turquoise	PE(40:4)>PE(18:0_22:4)_feature2	PE	0.768556	4.47899e-10
HIPPOC	M1	turquoise	PC(38:4)>PC(18:0_20:4)_feature4	PC	0.766205	5.44839e-10
HIPPOC	M1	turquoise	PC(35:4)_feature2	PC	0.765269	5.88657e-10
HIPPOC	M1	turquoise	PC(36:4)>PC(16:0_20:4)_feature3	PC	0.748986	2.14193e-09
HIPPOC	M1	turquoise	PE(44:10)>PE(22:4_22:6)_feature2	PE	0.732941	6.97387e-09
HIPPOC	M1	turquoise	TG(52:4)>TG(16:0_16:0_20:4)_and_TG(16:1_18:1_18:2)_and_TG(16:0_18:1_18:2)_feature6	TAG	0.730318	8.39131e-09
HIPPOC	M1	turquoise	PC(30:0)>PC(14:0_16:0)_feature1	PC	0.726596	1.08714e-08
HIPPOC	M1	turquoise	PC(38:5)>PC(16:0_22:5)_and_PC(18:1_20:4)_feature4	PC	0.72568	1.15789e-08
HIPPOC	M1	turquoise	TG(54:4)_feature6	TAG	0.723805	1.31642e-08
HIPPOC	M1	turquoise	DG(40:6)>DG(18:0_22:6_0:0)_feature6	DAG	0.718221	1.91751e-08
HIPPOC	M1	turquoise	Cer(d41:2)_feature2	Cer	0.717587	2.00016e-08
HIPPOC	M1	turquoise	PC(36:6)_feature3	PC	0.716334	2.17303e-08
HIPPOC	M1	turquoise	TG(56:6)>TG(18:0_16:0_22:6)_feature5	TAG	0.715865	2.24135e-08
HIPPOC	M1	turquoise	PC(38:6)_feature1	PC	0.714639	2.4294e-08
HIPPOC	M1	turquoise	Cer(d38:1)_feature1	Cer	0.712756	2.74725e-08
HIPPOC	M1	turquoise	TG(58:7)>TG(18:0_18:1_22:6)_feature5	TAG	0.704226	4.7383e-08
HIPPOC	M1	turquoise	PC(34:1)>PC(16:0_18:1)_feature2	PC	0.698917	6.58893e-08
HIPPOC	M1	turquoise	PE(O-42:5)>PE(O-20:1/22:4)_feature2	O-PE	0.697752	7.07646e-08
HIPPOC	M1	turquoise	PE(36:4)>(16:0_20:4)_feature3	PE	0.694315	8.71875e-08
HIPPOC	M1	turquoise	PC(34:2)_feature1	PC	0.689717	1.14759e-07
HIPPOC	M1	turquoise	PC(O-38:5)_feature3	O-PC	0.686273	1.40529e-07
HIPPOC	M1	turquoise	PC(40:8)_feature1	PC	0.686268	1.40565e-07
HIPPOC	M1	turquoise	PC(34:3)_feature4	PC	0.682252	1.77408e-07
HIPPOC	M1	turquoise	TG(60:10)>TG(18:0_20:4_22:6)_feature5	TAG	0.680907	1.91633e-07
HIPPOC	M1	turquoise	TG(56:5)>TG(16:0_18:1_22:4)_feature5	TAG	0.671781	3.20059e-07
HIPPOC	M1	turquoise	TG(58:8)>TG(18:0_20:4_20:4)_and_TG(18:0_18:2_22:6)_feature5	TAG	0.667503	4.04583e-07
HIPPOC	M1	turquoise	PC(40:4)_feature1	PC	0.662015	5.4351e-07
HIPPOC	M1	turquoise	PE(O-40:4)>PE(O-18:0/22:4)_feature4	O-PE	0.661839	5.48614e-07
HIPPOC	M1	turquoise	PE(38:5)_feature2	PE	0.656535	7.25448e-07
HIPPOC	M1	turquoise	TG(56:4)>TG(18:0_18:0_20:4)_feature5	TAG	0.639957	1.67875e-06
HIPPOC	M1	turquoise	PE(O-42:7)>PE(O-18:1/24:6)_feature2	O-PE	0.634527	2.18613e-06
HIPPOC	M1	turquoise	PC(36:5)_feature2	PC	0.628711	2.88457e-06
HIPPOC	M1	turquoise	PC(32:1)>PC(14:0_18:1)_and_PC(16:0_16:1)_feature1	PC	0.617631	4.81712e-06
HIPPOC	M1	turquoise	TG(58:6)>TG(18:0_18:0_22:6)_feature7	TAG	0.614595	5.5251e-06
HIPPOC	M1	turquoise	PE(O-40:6)>PE(O-18:1/22:5)_feature4	O-PE	0.612196	6.15092e-06
HIPPOC	M1	turquoise	TG(54:3)>TG(18:1/18:1/18:1)_feature8	TAG	0.610534	6.62222e-06
HIPPOC	M1	turquoise	SM(d36:2)_feature1	SM	0.607516	7.56462e-06
HIPPOC	M1	turquoise	DG(34:1)>DG(16:0_18:1_0:0) _feature2	DAG	0.598984	1.09376e-05
HIPPOC	M1	turquoise	PE(38:4)>PE(16:0_22:4)_feature4	PE	0.590312	1.57415e-05
HIPPOC	M1	turquoise	Cer(d36:2)>Cer(d18:2/18:0)_feature1	Cer	0.579757	2.41797e-05
HIPPOC	M1	turquoise	PC(38:7)_feature2	PC	0.577885	2.60523e-05
HIPPOC	M1	turquoise	PE(36:5)_feature2	PE	0.561533	4.90377e-05
HIPPOC	M1	turquoise	PC(34:2)>PC(16:0_18:2)_feature1	PC	0.557983	5.60106e-05
HIPPOC	M1	turquoise	SM(d35:2)_feature1	SM	0.540051	0.000107184
HIPPOC	M1	turquoise	PC(O-36:5)_feature5	O-PC	0.53453	0.000129937
HIPPOC	M1	turquoise	PE(34:1)>PE(16:0_18:1)_feature1	PE	0.515906	0.000242859
HIPPOC	M1	turquoise	TG(56:8)>TG(16:0_18:2_22:6)_feature4	TAG	0.514718	0.000252437
HIPPOC	M1	turquoise	PC(42:4)>PC(18:0_22:4)_feature2	PC	0.502743	0.000369914
HIPPOC	M1	turquoise	PS(O-42:7)>PS(O-20:3/22:4)_feature1	O-PS	0.501472	0.000384903
HIPPOC	M1	turquoise	PE(O-38:5)>PE(O-16:1/22:4)_feature5	O-PE	0.50021	0.000400334
HIPPOC	M1	turquoise	PE(O-39:7)>PE(O-21:7/18:0)_and_PE(O-17:1/22:6)_feature2	O-PE	0.495868	0.000457775
HIPPOC	M1	turquoise	PC(31:1)_feature1	PC	0.493686	0.000489351
HIPPOC	M1	turquoise	PE(O-38:4)>PE(O-16:0/22:4)_feature1	O-PE	0.485442	0.000627105
HIPPOC	M1	turquoise	SM(d38:2)_feature2	SM	0.473843	0.000879872
HIPPOC	M1	turquoise	PE(O-40:5)>PE(O-18:1/22:4)_feature4	O-PE	0.467622	0.00105003
HIPPOC	M1	turquoise	PC(38:4)_feature1	PC	0.44947	0.00172657
HIPPOC	M1	turquoise	PE(O-38:7)>PE(O-16:1/22:6)_and_PE(O-20:7/18:0)_feature2	O-PE	0.447567	0.00181615
HIPPOC	M1	turquoise	SM(d34:1)_feature1	SM	0.432843	0.00266043
HIPPOC	M1	turquoise	PS(O-40:6)>PS(O-18:2/22:4)_feature1	O-PS	0.425349	0.00321055
HIPPOC	M1	turquoise	LPE(18:0)>LPE(18:0/0:0)_and_LPE(0:0/18:0)_feature1and2	LPE	0.412766	0.004361
HIPPOC	M1	turquoise	Cer(d42:1)>Cer(d18:1/24:0)_feature2	Cer	0.402387	0.00556667
HIPPOC	M1	turquoise	PE(O-40:7)>PE(O-18:1/22:6)_feature11	O-PE	0.394045	0.0067367
HIPPOC	M1	turquoise	PE(O-38:7)>PE(O-18:3/20:4)_feature1	O-PE	0.387098	0.0078683
HIPPOC	M1	turquoise	PC(37:4)_feature3	PC	0.384979	0.00824471
HIPPOC	M1	turquoise	LPE(16:0)_feature1and2	LPE	0.38225	0.00875228
HIPPOC	M1	turquoise	PC(38:3)_feature2	PC	0.377241	0.00975414
HIPPOC	M1	turquoise	TG(56:4)>TG(18:0_18:0_20:4)_feature4	TAG	0.374067	0.0104388
HIPPOC	M1	turquoise	PC(O-38:4)_feature6	O-PC	0.352535	0.0162651
HIPPOC	M1	turquoise	PS(34:0)>PS(16:0_18:0)_feature1	PS	0.345924	0.0185318
HIPPOC	M1	turquoise	SM(d34:2)_feature1	SM	0.340297	0.0206664
HIPPOC	M1	turquoise	PC(36:6)_feature5	PC	0.332348	0.0240313
HIPPOC	M1	turquoise	PE(42:5)>PE(22:1_20:4)_feature1	PE	0.30488	0.0393774
HIPPOC	M1	turquoise	Cer(d44:2)>Cer(d18:1/26:1)_feature1	Cer	0.296014	0.0457786
HIPPOC	M1	turquoise	PE(39:6)>PE(17:0_22:6)_feature2	PE	0.279249	0.0601882
HIPPOC	M1	turquoise	PE(36:2)>PE(18:1/18:1)_feature2	PE	0.227896	0.127696
HIPPOC	M2	blue	PE(O-38:2)>PE(O-18:1/20:1)_feature4	O-PE	0.953171	1.7591e-24
HIPPOC	M2	blue	PC(41:1)_feature1	PC	0.9508	5.08856e-24
HIPPOC	M2	blue	PE(O-37:2)_feature2	O-PE	0.944605	6.48767e-23
HIPPOC	M2	blue	PC(O-38:2)_feature3	O-PC	0.935186	1.86278e-21
HIPPOC	M2	blue	LPC(24:0)>LPC(0:0/24:0)feature1	LPC	0.930657	7.85388e-21
HIPPOC	M2	blue	LPC(22:0)>LPC(22:0/0:0)feature2	LPC	0.91897	2.13982e-19
HIPPOC	M2	blue	PC(43:2)_feature1	PC	0.918275	2.56382e-19
HIPPOC	M2	blue	HexCer(d42:2)>HexCer(d18:1/24:1)_feature3	HexCer	0.911507	1.37521e-18
HIPPOC	M2	blue	Cer(d42:2)>Cer(d18:1/24:1)_feature1	Cer	0.910093	1.92055e-18
HIPPOC	M2	blue	SM(d41:2)_feature1	SM	0.907034	3.88291e-18
HIPPOC	M2	blue	PE(O-40:2)>PE(O-18:1/22:1)_feature2	O-PE	0.905196	5.8584e-18
HIPPOC	M2	blue	LPC(20:0/0:0)_and_LPC(0:0/20:0)_feature1and2	LPC	0.903477	8.54367e-18
HIPPOC	M2	blue	PC(43:4)_feature1	PC	0.900155	1.73686e-17
HIPPOC	M2	blue	LPC(24:0)>LPC(24:0/0:0)feature2	LPC	0.897822	2.81721e-17
HIPPOC	M2	blue	PC(42:1)_feature2	PC	0.897761	2.85251e-17
HIPPOC	M2	blue	PE(O-34:2)>PE(O-16:1/18:1)_and_PE(O-18:2/16:0)_feature1	O-PE	0.891247	1.03625e-16
HIPPOC	M2	blue	PE(O-38:2)>PE(O-18:1/20:1)_feature6	O-PE	0.889687	1.39442e-16
HIPPOC	M2	blue	LPC(23:0)>LPC(23:0/0:0)_and_LPC(0:0/23:0)feature2	LPC	0.888765	1.65839e-16
HIPPOC	M2	blue	PC(44:2)_feature1	PC	0.886631	2.4628e-16
HIPPOC	M2	blue	PC(41:2)_feature2	PC	0.885056	3.28091e-16
HIPPOC	M2	blue	PC(42:2)_feature2	PC	0.88308	4.67509e-16
HIPPOC	M2	blue	PC(44:4)_feature2	PC	0.880296	7.61661e-16
HIPPOC	M2	blue	PC(35:1)_feature2	PC	0.880135	7.83152e-16
HIPPOC	M2	blue	LPC(26:0)>LPC(26:0/0:0)_and_LPC(0:0/26:0)feature1and2	LPC	0.866217	7.56902e-15
HIPPOC	M2	blue	PC(37:1)_feature2	PC	0.866	7.82467e-15
HIPPOC	M2	blue	LPC(24:1)>LPC(24:1/0:0)feature2	LPC	0.861412	1.56253e-14
HIPPOC	M2	blue	PC(39:1)_feature3	PC	0.861186	1.61552e-14
HIPPOC	M2	blue	HexCer(d40:2-OH)>HexCer(d18:2/22:0-OH)_feature2	HexCer	0.834701	5.65681e-13
HIPPOC	M2	blue	HexCer(d36:1)>HexCer(d18:1/18:0)_feature1	HexCer	0.820069	3.1164e-12
HIPPOC	M2	blue	PC(39:1)_feature4	PC	0.818976	3.5183e-12
HIPPOC	M2	blue	PC(42:4)_feature3	PC	0.816869	4.43476e-12
HIPPOC	M2	blue	HexCer(d41:2-OH)>HexCer(d18:1/23:1-OH)_feature1	HexCer	0.80768	1.17716e-11
HIPPOC	M2	blue	HexCer(d43:2)_feature1	HexCer	0.788696	7.56905e-11
HIPPOC	M2	blue	PC(37:1)_feature5	PC	0.787591	8.38544e-11
HIPPOC	M2	blue	Car(21:2)_feature1	Car	0.786168	9.56049e-11
HIPPOC	M2	blue	HexCer(d41:2-OH)>HexCer(d18:1/23:1-OH)_feature2	HexCer	0.785514	1.01501e-10
HIPPOC	M2	blue	HexCer(d40:1)>HexCer(d18:1_22:0)_feature2	HexCer	0.783638	1.20392e-10
HIPPOC	M2	blue	PC(O-34:1)_feature3	O-PC	0.782472	1.33762e-10
HIPPOC	M2	blue	LPC(17:0/0:0)_feature2	LPC	0.775449	2.48807e-10
HIPPOC	M2	blue	HexCer(d42:3)>HexCer(d18:2/24:1)_feature1	HexCer	0.771074	3.62181e-10
HIPPOC	M2	blue	Cer(d42:3)_feature1	Cer	0.763454	6.83246e-10
HIPPOC	M2	blue	PC(43:1)_feature1	PC	0.762138	7.60624e-10
HIPPOC	M2	blue	PE(36:1)>PE(18:0_18:1)_feature3	PE	0.761761	7.84271e-10
HIPPOC	M2	blue	Hex2Cer(d42:2)>Hex2Cer(d18:1/24:1)_feature1	Hex2Cer	0.746278	2.63027e-09
HIPPOC	M2	blue	Cer(d42:2)_feature4	Cer	0.727347	1.03214e-08
HIPPOC	M2	blue	HexCer(d38:1)>HexCer(d18:1/20:0)_feature1	HexCer	0.719671	1.7406e-08
HIPPOC	M2	blue	HexCer(d42:1-OH)>HexCer(d18:1/24:0-OH)_feature3	HexCer	0.717088	2.0674e-08
HIPPOC	M2	blue	HexCer(d40:1)>HexCer(d18:1_22:0)_feature1	HexCer	0.716803	2.10675e-08
HIPPOC	M2	blue	PE(O-34:2)>PE(O-16:2/18:0)_and_PE(O-18:2/16:0)_feature2	O-PE	0.71378	2.56986e-08
HIPPOC	M2	blue	PE(36:1)_feature3	PE	0.695314	8.20817e-08
HIPPOC	M2	blue	PE(O-36:2)>PE(O-18:1/18:1)_feature4	O-PE	0.692603	9.66371e-08
HIPPOC	M2	blue	HexCer(d43:1)>HexCer(d18:1/25:0)_feature1	HexCer	0.689099	1.19034e-07
HIPPOC	M2	blue	HexCer(d43:2-OH)>HexCer(d18:1/25:1-OH)_feature1	HexCer	0.687304	1.32296e-07
HIPPOC	M2	blue	PC(36:1)_feature1	PC	0.680848	1.92282e-07
HIPPOC	M2	blue	Car(16:0)_feature1	Car	0.672025	3.15772e-07
HIPPOC	M2	blue	PC(42:2)_feature1	PC	0.655214	7.77074e-07
HIPPOC	M2	blue	PE(O-34:1)_feature1	O-PE	0.654908	7.89513e-07
HIPPOC	M2	blue	HexCer(d41:1)_feature1	HexCer	0.635041	2.13263e-06
HIPPOC	M2	blue	HexCer(d41:1-OH)_feature2	HexCer	0.634238	2.21677e-06
HIPPOC	M2	blue	PC(38:1)_feature1	PC	0.611818	6.25537e-06
HIPPOC	M2	blue	HexCer(d38:2)>HexCer(d18:2/20:0)_feature1	HexCer	0.610681	6.57948e-06
HIPPOC	M2	blue	SM(d41:0)_feature1	SM	0.597281	1.1758e-05
HIPPOC	M2	blue	sn-glycero-3-phosphocholine_feature1	Organic phosphoric acids	0.591096	1.52382e-05
HIPPOC	M2	blue	PC(40:1)_feature1	PC	0.587087	1.79763e-05
HIPPOC	M2	blue	HexCer(d43:1-OH)_feature1	HexCer	0.578753	2.51683e-05
HIPPOC	M2	blue	HexCer(d44:1)>HexCer(d18:1/26:0)_feature1	HexCer	0.560414	5.11438e-05
HIPPOC	M2	blue	PC(37:1)_feature1	PC	0.548787	7.84895e-05
HIPPOC	M2	blue	SM(d43:1)_feature2	SM	0.54407	9.29694e-05
HIPPOC	M2	blue	HexCer(d39:2-OH)_feature1	HexCer	0.540132	0.000106878
HIPPOC	M2	blue	HexCer(d36:2)>HexCer(d18:2/18:0)_feature1	HexCer	0.536513	0.0001213
HIPPOC	M2	blue	PS(O-40:4)>PS(O-20:3/20:1)_feature1	O-PS	0.521858	0.000199644
HIPPOC	M2	blue	PC(35:0)_feature3	PC	0.498709	0.000419407
HIPPOC	M2	blue	PE(O-37:5)>PE(O-17:1/20:4)_feature2	O-PE	0.487353	0.000592404
HIPPOC	M2	blue	SM(d44:3)_feature1	SM	0.482341	0.000687332
HIPPOC	M2	blue	SM(d42:2)_feature1	SM	0.466448	0.00108524
HIPPOC	M2	blue	SM(d40:1)_feature1	SM	0.463907	0.00116511
HIPPOC	M2	blue	PC(42:3)_feature2	PC	0.442112	0.00209621
HIPPOC	M2	blue	Cer(d42:1)>Cer(d18:1/24:0)_feature1	Cer	0.422615	0.00343484
HIPPOC	M2	blue	HexCer(d42:0-OH)>HexCer(d18:0/24:0-OH)_feature1	HexCer	0.418441	0.00380385
HIPPOC	M2	blue	LPC(18:0)>LPC(18:0/0:0)_and_LPC(0:0/18:0)_feature2	LPC	0.4133	0.00430569
HIPPOC	M2	blue	PE(O-40:5)>PE(O-18:1/22:4)_feature9	O-PE	0.409393	0.00472503
HIPPOC	M2	blue	SM(d43:1)_feature1and2	SM	0.397787	0.00618783
HIPPOC	M2	blue	SM(d40:2)_feature1	SM	0.386959	0.0078925
HIPPOC	M2	blue	PE(O-38:5)>PE(O-18:1/20:4)_feature9	O-PE	0.381266	0.00894175
HIPPOC	M2	blue	SM(d44:1)_feature1	SM	0.377511	0.00969765
HIPPOC	M2	blue	TG(57:1)>TG(16:0_18:1_23:0)_and_TG(18:0_18:1_21:0)_feature1	TAG	0.356132	0.0151336
HIPPOC	M2	blue	Hex2Cer(d41:3)_feature1	Hex2Cer	0.344961	0.0188833
HIPPOC	M2	blue	PC(44:4)_feature1	PC	0.341018	0.0203816
HIPPOC	M2	blue	HexCer(d40:2-OH)>HexCer(d18:2/22:0-OH)_feature1	HexCer	0.327261	0.0264162
HIPPOC	M2	blue	PC(46:7)_feature1	PC	0.320402	0.0299423
HIPPOC	M3	brown	PS(40:6)>PS(18:0_22:6)_feature3	PS	0.901336	1.35371e-17
HIPPOC	M3	brown	Cer(d36:1)>Cer(d18:1/18:0)_feature1	Cer	0.889753	1.37731e-16
HIPPOC	M3	brown	PC(O-32:1)>PC(O-16:1/16:0)_feature2	O-PC	0.876912	1.35677e-15
HIPPOC	M3	brown	PE(O-34:1)_feature3	O-PE	0.865277	8.74068e-15
HIPPOC	M3	brown	PC(32:0)_feature2	PC	0.861694	1.49858e-14
HIPPOC	M3	brown	PC(O-32:0)_feature1	O-PC	0.855898	3.47451e-14
HIPPOC	M3	brown	PC(O-34:0)_feature1	O-PC	0.850415	7.44738e-14
HIPPOC	M3	brown	PC(O-32:1)_feature2	O-PC	0.849249	8.72471e-14
HIPPOC	M3	brown	PC(34:0)>PC(16:0_18:0)_feature3	PC	0.846316	1.29156e-13
HIPPOC	M3	brown	PE(O-32:1)>PE(O-16:1/16:0)_feature1	O-PE	0.839699	3.03937e-13
HIPPOC	M3	brown	PS(34:1)>PS(16:0_18:1)_feature1	PS	0.831596	8.23657e-13
HIPPOC	M3	brown	PE(34:0)>PE(16:0_18:0)_feature2	PE	0.827642	1.31447e-12
HIPPOC	M3	brown	PE(O-34:1)>PE(O-18:1/16:0)_feature2	O-PE	0.821909	2.53629e-12
HIPPOC	M3	brown	PE(32:0)>PE(16:0/16:0)_feature1	PE	0.818844	3.57024e-12
HIPPOC	M3	brown	PC(35:0)_feature2	PC	0.806022	1.39608e-11
HIPPOC	M3	brown	PG(32:0)>PG(16:0/16:0)_feature1	PG	0.803856	1.74028e-11
HIPPOC	M3	brown	PE(O-42:6)>PE(O-18:1/24:5)_feature2	O-PE	0.798928	2.84487e-11
HIPPOC	M3	brown	Cer(d36:2)_feature1	Cer	0.792036	5.5324e-11
HIPPOC	M3	brown	PI(36:4)>PI(16:0_20:4)_feature1	PI	0.791689	5.71719e-11
HIPPOC	M3	brown	SM(d40:0-OH)_feature1	SM	0.787076	8.79388e-11
HIPPOC	M3	brown	SM(d36:1)_feature1	SM	0.784458	1.11761e-10
HIPPOC	M3	brown	PS(O-40:7)>PS(O-20:3/20:4)_feature2	O-PS	0.784053	1.1595e-10
HIPPOC	M3	brown	PS(44:12)>PS(22:6/22:6)_feature1	PS	0.771431	3.51355e-10
HIPPOC	M3	brown	PI(38:5)>PI(18:1_20:4)_feature1	PI	0.76895	4.33308e-10
HIPPOC	M3	brown	SM(d36:0)_feature1	SM	0.768155	4.63193e-10
HIPPOC	M3	brown	DG(32:0)>DG(16:0_16:0_0:0)_feature2	DAG	0.768129	4.64211e-10
HIPPOC	M3	brown	PC(33:0)_feature3	PC	0.756938	1.15431e-09
HIPPOC	M3	brown	PS(44:10)>PS(22:4_22:6)_feature1	PS	0.748476	2.22695e-09
HIPPOC	M3	brown	PS(40:6)_feature3	PS	0.748323	2.25292e-09
HIPPOC	M3	brown	Cer(d36:1)_feature1	Cer	0.744993	2.89692e-09
HIPPOC	M3	brown	DG(34:0)>DG(16:0_18:0_0:0)_feature2	DAG	0.735768	5.69949e-09
HIPPOC	M3	brown	PS(40:4)>PS(18:0_22:4)_feature1	PS	0.7248	1.22996e-08
HIPPOC	M3	brown	PE(O-40:6)>PE(O-18:2/22:4)_feature3	O-PE	0.708384	3.64137e-08
HIPPOC	M3	brown	SM(d38:0-OH)_feature1	SM	0.70737	3.88461e-08
HIPPOC	M3	brown	SM(d38:1)_feature2	SM	0.698185	6.89128e-08
HIPPOC	M3	brown	CL(76:10)_feature1	CL	0.697756	7.07485e-08
HIPPOC	M3	brown	Cer(d34:1)_feature1	Cer	0.686967	1.34932e-07
HIPPOC	M3	brown	SM(d39:1)_feature2	SM	0.665971	4.39613e-07
HIPPOC	M3	brown	PI(38:4)>PI(18:0_20:4)_feature2	PI	0.644022	1.37293e-06
HIPPOC	M3	brown	PC(O-34:1)_feature4	O-PC	0.641958	1.52109e-06
HIPPOC	M3	brown	FA(20:4)_feature1	FA	0.622176	3.91275e-06
HIPPOC	M3	brown	PE(42:8)>PE(20:4_22:4)_feature5	PE	0.621123	4.10694e-06
HIPPOC	M3	brown	PS(44:10)_feature1	PS	0.618279	4.67733e-06
HIPPOC	M3	brown	PC(O-33:0)_feature1	O-PC	0.600699	1.01649e-05
HIPPOC	M3	brown	PC(34:0)_feature4	PC	0.599821	1.0554e-05
HIPPOC	M3	brown	PS(40:7)_feature1	PS	0.598245	1.12868e-05
HIPPOC	M3	brown	PS(40:5)>PS(18:0_22:5)_feature5	PS	0.565035	4.29462e-05
HIPPOC	M3	brown	PS(38:5)>PS(18:1_20:4)_feature1	PS	0.564143	4.44272e-05
HIPPOC	M3	brown	PE(40:5)_feature4	PE	0.560176	5.16022e-05
HIPPOC	M3	brown	PI(40:6)>PI(18:0_22:6)_feature1	PI	0.559223	5.3478e-05
HIPPOC	M3	brown	PC(32:0)>PC(16:0_16:0)_feature2	PC	0.550726	7.31595e-05
HIPPOC	M3	brown	octadecanamine_feature1	Fatty amines	0.541343	0.000102411
HIPPOC	M3	brown	LPE(O-15:0)_feature1	O-LPE	0.529205	0.000155958
HIPPOC	M3	brown	PC(O-40:6)_feature4	O-PC	0.526203	0.000172636
HIPPOC	M3	brown	Cer(d43:1)>Cer(d18:1/25:0)_feature2	Cer	0.519809	0.000213663
HIPPOC	M3	brown	PS(O-40:7)>PS(O-18:3/22:4)_feature1	O-PS	0.517726	0.00022882
HIPPOC	M3	brown	PS(40:5)_feature3	PS	0.517219	0.000232658
HIPPOC	M3	brown	PC(36:0)_feature2	PC	0.508159	0.000311747
HIPPOC	M3	brown	PE(40:5)>PE(18:0_22:5)_feature4	PE	0.484573	0.000643492
HIPPOC	M3	brown	PS(40:5)_feature5	PS	0.483945	0.000655569
HIPPOC	M3	brown	PS(40:4)_feature1	PS	0.480888	0.00071731
HIPPOC	M3	brown	PE(O-40:7)>PE(O-18:1/22:6)_and_PE(O-22:7/18:0)_feature3	O-PE	0.46884	0.00101455
HIPPOC	M3	brown	PC(36:3)>PC(16:0_20:3)_feature5	PC	0.457767	0.00138011
HIPPOC	M3	brown	PC(32:2)_feature4	PC	0.450977	0.00165842
HIPPOC	M3	brown	PC(O-38:4)_feature3	O-PC	0.441696	0.00211903
HIPPOC	M3	brown	PE(O-38:6)>PE(O-18:2/20:4)_and_PE(O-16:1/22:5)_feature3	O-PE	0.418872	0.00376416
HIPPOC	M3	brown	PE(O-38:6)>PE(O-16:1/22:5)_feature3	O-PE	0.418049	0.0038402
HIPPOC	M3	brown	LPE(22:6)>LPE(22:6/0:0)_and_LPE(0:0/22:6)_feature1and2	LPE	0.407716	0.00491567
HIPPOC	M3	brown	PE(34:0)>PE(16:0_18:0)_feature1	PE	0.402685	0.00552838
HIPPOC	M3	brown	LPE(20:4)>LPE(20:4/0:0)_and_LPE(0:0/20:4)_feature1and2	LPE	0.381952	0.00880922
HIPPOC	M3	brown	PC(36:5)>PC(16:1_20:4)_feature2	PC	0.378958	0.00940007
HIPPOC	M3	brown	FA(22:6)_feature1	FA	0.376622	0.00988463
HIPPOC	M3	brown	PS(36:2)>PS(18:1_18:1)_feature2	PS	0.375983	0.0100207
HIPPOC	M3	brown	TG(58:8)>TG(18:0_20:4_20:4)_and_TG(18:0_18:2_22:6)_feature6	TAG	0.370794	0.0111877
HIPPOC	M3	brown	PE(38:4)>PE(18:0_20:4)_feature2	PE	0.369451	0.0115081
HIPPOC	M3	brown	PS(38:5)_feature1	PS	0.368799	0.0116662
HIPPOC	M3	brown	PI(38:4)>PI(18:0_20:4)_feature3	PI	0.361485	0.013574
HIPPOC	M3	brown	PC(O-36:5)>PC(O-16:1/20:4)_feature5	O-PC	0.360926	0.0137303
HIPPOC	M3	brown	PE(38:5)>PE(16:0_22:5)_and_PE(18:1_20:4)_feature5	PE	0.349721	0.0171995
HIPPOC	M3	brown	LPC(20:4)>LPC(20:4/0:0)_and_LPC(0:0/20:4)_feature1and2	LPC	0.338158	0.02153
HIPPOC	M3	brown	LPC(16:0)>LPC(0:0/16:0)feature1	LPC	0.337531	0.0217891
HIPPOC	M3	brown	PE(38:3)>PE(18:0_20:3)_feature4	PE	0.326517	0.0267811
HIPPOC	M3	brown	PC(36:3)_feature5	PC	0.319453	0.0304594
HIPPOC	M3	brown	PE(38:3)>PE(18:0_20:3)_feature3	PE	-0.0320074	0.832759
HIPPOC	M4	yellow	HexCer(d42:2)_feature3	HexCer	0.945357	4.83982e-23
HIPPOC	M4	yellow	PE(O-36:3)>PE(O-18:2/18:1)_feature4	O-PE	0.938879	5.3235e-22
HIPPOC	M4	yellow	PE(O-38:3)>PE(O-18:2/20:1)_feature2	O-PE	0.937274	9.26023e-22
HIPPOC	M4	yellow	PE(O-36:4)>PE(O-18:3/18:1)_feature6	O-PE	0.919057	2.09182e-19
HIPPOC	M4	yellow	PE(O-37:3)>PE(O-18:2/19:1)_and_PE(O-19:2/18:1)_feature1	O-PE	0.917698	2.97515e-19
HIPPOC	M4	yellow	PE(O-35:2)>PE(O-16:1/19:1)_and_PE(O-17:1/18:1)_feature3	O-PE	0.915101	5.73532e-19
HIPPOC	M4	yellow	PC(O-34:2)_feature2	O-PC	0.90952	2.19514e-18
HIPPOC	M4	yellow	PE(O-42:3)>PE(O-18:2/24:1)_feature1	O-PE	0.908619	2.70434e-18
HIPPOC	M4	yellow	LPC(22:1)>LPC(22:1/0:0)feature2	LPC	0.898177	2.61932e-17
HIPPOC	M4	yellow	PE(40:2)>PE(18:1_22:1)_feature1	PE	0.897735	2.86781e-17
HIPPOC	M4	yellow	PE(O-37:2)>PE(O-18:1/19:1)_and_PE(O-17:1/20:1)_feature1	O-PE	0.88285	4.86933e-16
HIPPOC	M4	yellow	PE(O-40:3)>PE(O-18:2/22:1)_feature1	O-PE	0.881569	6.10249e-16
HIPPOC	M4	yellow	PC(O-36:1)>PC(O-18:1/18:0)_and_PC(O-16:0/20:1)_feature3	O-PC	0.879696	8.44908e-16
HIPPOC	M4	yellow	PE(O-39:3)>PE(O-18:2/21:1)_and_PE(O-19:2/20:1)_feature2	O-PE	0.87954	8.67854e-16
HIPPOC	M4	yellow	PE(O-40:2)>PE(O-18:1/22:1)_feature1	O-PE	0.879539	8.6806e-16
HIPPOC	M4	yellow	PC(O-36:2))_feature2	O-PC	0.878519	1.0337e-15
HIPPOC	M4	yellow	PC(44:2)>PC(18:1_26:1)_feature1	PC	0.877011	1.33443e-15
HIPPOC	M4	yellow	HexCer(d41:2-OH)_feature1	HexCer	0.875456	1.73038e-15
HIPPOC	M4	yellow	PC(42:1)>PC(18:1/24:0)_feature2	PC	0.874361	2.07362e-15
HIPPOC	M4	yellow	HexCer(d41:2)_feature2	HexCer	0.870832	3.67292e-15
HIPPOC	M4	yellow	HexCer(d36:1)_feature1	HexCer	0.862115	1.40766e-14
HIPPOC	M4	yellow	PE(40:1)>PE(18:1_22:0)_feature1	PE	0.857211	2.88101e-14
HIPPOC	M4	yellow	HexCer(d40:2)_feature1	HexCer	0.8562	3.3284e-14
HIPPOC	M4	yellow	HexCer(d44:2)_feature1	HexCer	0.848715	9.37639e-14
HIPPOC	M4	yellow	SM(d42:2)_feature1and2	SM	0.840051	2.90705e-13
HIPPOC	M4	yellow	PC(O-34:1)>PC(O-18:1/16:0)_feature2	O-PC	0.836753	4.39421e-13
HIPPOC	M4	yellow	PE(O-34:2)>PE(O-16:2/18:0)_and_PE(O-18:2/16:0)_feature1	O-PE	0.834884	5.5315e-13
HIPPOC	M4	yellow	PC(43:1)>PC(18:1_25:0)_feature1	PC	0.832828	7.10219e-13
HIPPOC	M4	yellow	PC(41:1)>PC(18:1_23:0)_feature1	PC	0.832738	7.1801e-13
HIPPOC	M4	yellow	PC(O-32:1)_feature1	O-PC	0.829584	1.04632e-12
HIPPOC	M4	yellow	PC(O-36:1)_feature3	O-PC	0.826344	1.52855e-12
HIPPOC	M4	yellow	PE(O-41:3)>PE(O-18:2/23:1)_feature1	O-PE	0.814653	5.63943e-12
HIPPOC	M4	yellow	HexCer(d40:2-OH)_feature1	HexCer	0.809091	1.01673e-11
HIPPOC	M4	yellow	PE(38:1)>PE(18:1_20:0)_and_PE(18:0_20:1)_feature2	PE	0.80851	1.08011e-11
HIPPOC	M4	yellow	PE(O-38:2)>PE(O-18:1/20:1)_feature2	O-PE	0.808395	1.09303e-11
HIPPOC	M4	yellow	HexCer(d38:1)_feature1	HexCer	0.790149	6.60902e-11
HIPPOC	M4	yellow	HexCer(d42:1)_feature2	HexCer	0.790024	6.68688e-11
HIPPOC	M4	yellow	PC(40:2)_feature1	PC	0.785837	9.85471e-11
HIPPOC	M4	yellow	PS(O-40:5)>PS(O-20:4/20:1)_feature1	O-PS	0.774336	2.73958e-10
HIPPOC	M4	yellow	HexCer(d40:2)_feature2	HexCer	0.773226	3.01421e-10
HIPPOC	M4	yellow	HexCer(d44:1)_feature1	HexCer	0.764185	6.43577e-10
HIPPOC	M4	yellow	HexCer(d40:2-OH)>HexCer(d18:1/22:1-OH)_feature1	HexCer	0.758302	1.03572e-09
HIPPOC	M4	yellow	PE(O-39:5)_feature3	O-PE	0.756799	1.16704e-09
HIPPOC	M4	yellow	PC(O-36:2)_feature3	O-PC	0.732005	7.45179e-09
HIPPOC	M4	yellow	PE(O-38:5)>PE(O-18:2/20:3)_feature4	O-PE	0.729494	8.88932e-09
HIPPOC	M4	yellow	PE(35:1)>PE(17:0_18:1)_feature1	PE	0.715018	2.36973e-08
HIPPOC	M4	yellow	HexCer(d34:1)>HexCer(d18:1/16:0)_feature1	HexCer	0.698749	6.65695e-08
HIPPOC	M4	yellow	HexCer(d42:0)_feature1	HexCer	0.697507	7.18312e-08
HIPPOC	M4	yellow	PC(35:1)>PC(17:0_18:1)_feature1	PC	0.692943	9.46906e-08
HIPPOC	M4	yellow	PE(O-34:3)>PE(O-16:1/18:2)_feature1	O-PE	0.690812	1.07538e-07
HIPPOC	M4	yellow	PC(38:2)>PC(18:1_20:1)_feature2	PC	0.67094	3.35246e-07
HIPPOC	M4	yellow	PE(O-40:6)>PE(O-18:2/22:4)_feature2	O-PE	0.667798	3.98153e-07
HIPPOC	M4	yellow	PC(36:1)>PC(16:0_20:1)_and_PC(18:0_18:1)_feature1	PC	0.662782	5.21744e-07
HIPPOC	M4	yellow	Sulfatide(d34:1)_feature1	SHexCer	0.633298	2.31918e-06
HIPPOC	M4	yellow	PE(O-32:2)>PE(O-16:1/16:1)_feature1	O-PE	0.632476	2.41227e-06
HIPPOC	M4	yellow	HexCer(d38:1-OH)_feature1	HexCer	0.623788	3.63153e-06
HIPPOC	M4	yellow	PC(34:0)_feature1	PC	0.62368	3.64984e-06
HIPPOC	M4	yellow	LPC(20:1)>LPC(20:1/0:0)feature2	LPC	0.614172	5.63093e-06
HIPPOC	M4	yellow	PE(O-44:6)>PE(O-18:2/24:4)_feature1	O-PE	0.613876	5.70625e-06
HIPPOC	M4	yellow	PE(O-40:5)>PE(O-18:1/22:4)_feature1	O-PE	0.61192	6.22704e-06
HIPPOC	M4	yellow	HexCer(d42:0-OH)_feature1	HexCer	0.607943	7.42411e-06
HIPPOC	M4	yellow	HexCer(d42:2-OH)>HexCer(d18:1/24:1-OH)_feature3	HexCer	0.588184	1.71854e-05
HIPPOC	M4	yellow	PC(42:3)_feature1	PC	0.575869	2.82169e-05
HIPPOC	M4	yellow	PE(O-34:1)>PE(O-18:1_16:0)_feature1	O-PE	0.570666	3.45872e-05
HIPPOC	M4	yellow	Cer(d42:2-OH)>Cer(d18:1/24:1-OH) _feature1	Cer	0.565531	4.21417e-05
HIPPOC	M4	yellow	PE(O-38:4)_feature5	O-PE	0.557798	5.63968e-05
HIPPOC	M4	yellow	PE(O-40:7)>PE(O-18:2/22:5)_feature4	O-PE	0.555844	6.06379e-05
HIPPOC	M4	yellow	HexCer(d40:2-OH)_feature2	HexCer	0.547811	8.13043e-05
HIPPOC	M4	yellow	Hex2Cer(d42:3)_feature1	Hex2Cer	0.53106	0.0001464
HIPPOC	M4	yellow	PC(O-42:3)_feature1	O-PC	0.507536	0.00031799
HIPPOC	M4	yellow	MGDG(34:1)>MGDG(16:0_18:1)_feature1	MGDG	0.506701	0.000326535
HIPPOC	M4	yellow	PC(O-38:4)_feature5	O-PC	0.477056	0.000802041
HIPPOC	M4	yellow	HexCer(d41:2)_feature3	HexCer	0.364656	0.0127166
HIPPOC	M4	yellow	HexCer(d40:1)_feature2	HexCer	0.363169	0.0131127
HIPPOC	M4	yellow	PC(41:2)>PC(18:1_23:1)_feature2	PC	0.349754	0.0171883
HIPPOC	M4	yellow	PC(36:0)_feature1	PC	0.34651	0.0183206
HIPPOC	M4	yellow	PE(O-34:2)>PE(O-16:2/18:0)_and_PE(O-34:2)>PE(O-18:2/16:0)_feature1	O-PE	0.287577	0.0526328
HIPPOC	M4	yellow	PC(O-33:0)_feature2	O-PC	0.0364904	0.809742
HIPPOC	M5	green	PC(38:5)_feature3	PC	0.927087	2.28382e-20
HIPPOC	M5	green	PE(O-40:8)>PE(O-18:2/22:6)_feature2	O-PE	0.903167	9.13774e-18
HIPPOC	M5	green	DG(38:5)>DG(18:1_20:4_0:0)_feature2	DAG	0.899716	1.90399e-17
HIPPOC	M5	green	PC(44:8)_feature1	PC	0.890206	1.26409e-16
HIPPOC	M5	green	PC(39:5)_feature2	PC	0.884779	3.4496e-16
HIPPOC	M5	green	PE(38:5)>PE(18:1_20:4)_feature3	PE	0.883632	4.23751e-16
HIPPOC	M5	green	PC(41:3)_feature1	PC	0.873126	2.53755e-15
HIPPOC	M5	green	PC(42:8)_feature2	PC	0.869544	4.50653e-15
HIPPOC	M5	green	PC(36:2)_feature2	PC	0.868206	5.56068e-15
HIPPOC	M5	green	PE(44:12)_feature1	PE	0.859736	1.99927e-14
HIPPOC	M5	green	PE(O-38:7)>PE(O-16:1/22:6)_feature2	O-PE	0.858277	2.47116e-14
HIPPOC	M5	green	PC(40:7)_feature3	PC	0.847348	1.12615e-13
HIPPOC	M5	green	PC(40:7)_feature1	PC	0.844697	1.59821e-13
HIPPOC	M5	green	PC(37:5)_feature2	PC	0.832243	7.62036e-13
HIPPOC	M5	green	PE(40:7)_feature3	PE	0.830884	8.96772e-13
HIPPOC	M5	green	PE(42:8)>PE(20:4_22:4)_feature2	PE	0.813067	6.68479e-12
HIPPOC	M5	green	PE(36:3)_feature2	PE	0.8104	8.86577e-12
HIPPOC	M5	green	Ubiquinol Q9_feature1	Ubiquinones	0.79952	2.68375e-11
HIPPOC	M5	green	PC(O-40:7)_feature1	O-PC	0.798151	3.07035e-11
HIPPOC	M5	green	PE(38:6)>PE(18:2_20:4)_feature2	PE	0.79207	5.51466e-11
HIPPOC	M5	green	DG(40:7)>DG(18:1_22:6_0:0)_feature3	DAG	0.789892	6.77019e-11
HIPPOC	M5	green	CE(22:6)_feature2	CE	0.782782	1.3007e-10
HIPPOC	M5	green	PC(44:10)_feature1	PC	0.782018	1.39334e-10
HIPPOC	M5	green	PC(42:9)_feature3	PC	0.766075	5.50719e-10
HIPPOC	M5	green	PC(39:6)_feature4	PC	0.758478	1.02127e-09
HIPPOC	M5	green	Coenzyme Q10_feature1	Ubiquinones	0.751934	1.70789e-09
HIPPOC	M5	green	PC(44:12)_feature1	PC	0.743314	3.28341e-09
HIPPOC	M5	green	PE(40:4)>PE(18:0_22:4)_feature1	PE	0.738349	4.72975e-09
HIPPOC	M5	green	DG(35:4)_feature1	DAG	0.738231	4.77025e-09
HIPPOC	M5	green	Coenzyme(Q9)_feature1	Ubiquinones	0.73713	5.16646e-09
HIPPOC	M5	green	Ubiquinol Q10 _feature1	Ubiquinones	0.73627	5.49723e-09
HIPPOC	M5	green	DG(36:4)>DG(16:0_20:4_0:0)_feature2	DAG	0.731918	7.49762e-09
HIPPOC	M5	green	CE(20:4)_feature1	CE	0.730257	8.42752e-09
HIPPOC	M5	green	PC(39:5)_feature7	PC	0.724164	1.28456e-08
HIPPOC	M5	green	PS(40:6)>PS(18:0_22:6)_feature2	PS	0.717154	2.05842e-08
HIPPOC	M5	green	PC(O-36:5)_feature1	O-PC	0.715484	2.29831e-08
HIPPOC	M5	green	PC(42:7)_feature4	PC	0.709635	3.36103e-08
HIPPOC	M5	green	PC(O-36:3)_feature3	O-PC	0.703802	4.86605e-08
HIPPOC	M5	green	PE(O-35:3)>PE(O-18:2/17:1)_and_PE(O-17:2/18:1)_feature1	O-PE	0.69856	6.73467e-08
HIPPOC	M5	green	PC(37:3)_feature1	PC	0.692721	9.59541e-08
HIPPOC	M5	green	adenosine_feature1	Purines	0.684993	1.51404e-07
HIPPOC	M5	green	PC(41:7)_feature1	PC	0.683046	1.69478e-07
HIPPOC	M5	green	PE(44:10)_feature2	PE	0.681435	1.85924e-07
HIPPOC	M5	green	PC(36:4)_feature2	PC	0.680183	1.99721e-07
HIPPOC	M5	green	SiE(20:4)_feature3	SiE	0.674658	2.72802e-07
HIPPOC	M5	green	PC(35:4)_feature4	PC	0.648825	1.07848e-06
HIPPOC	M5	green	Car(18:2)_feature1	Car	0.647938	1.12801e-06
HIPPOC	M5	green	PC(38:2)_feature2	PC	0.63557	2.07885e-06
HIPPOC	M5	green	PE(O-42:6)>PE(O-18:2/24:4)_feature1	O-PE	0.632126	2.45288e-06
HIPPOC	M5	green	Car(20:4)_feature1	Car	0.619886	4.34668e-06
HIPPOC	M5	green	PC(O-36:4)_feature2	O-PC	0.604511	8.62421e-06
HIPPOC	M5	green	PC(O-40:4)_feature1	O-PC	0.593047	1.40499e-05
HIPPOC	M5	green	Car(18:1-OH)_feature1	Car	0.576263	2.77817e-05
HIPPOC	M5	green	DG(38:4)>DG(16:0_22:4_0:0)_feature4	DAG	0.556337	5.95393e-05
HIPPOC	M5	green	TG(60:10)>TG(18:0_20:4_22:6)_feature4	TAG	0.512167	0.000274168
HIPPOC	M5	green	PC(40:5)_feature2	PC	0.50766	0.000316736
HIPPOC	M5	green	DG(38:4)>DG(18:0_20:4_0:0)_feature6	DAG	0.503296	0.000363548
HIPPOC	M5	green	PS(36:2)_feature3	PS	0.484741	0.000640292
HIPPOC	M5	green	PC(34:4)_feature4	PC	0.459722	0.00130812
HIPPOC	M5	green	PE(O-36:5)>PE(O-16:1/20:4)_feature3	O-PE	0.456535	0.00142728
HIPPOC	M5	green	Car(20:1)_feature1	Car	0.431462	0.00275505
HIPPOC	M5	green	PC(O-36:4)_feature5	O-PC	0.403655	0.00540533
HIPPOC	M5	green	PC(39:6)_feature1	PC	0.369339	0.011535
HIPPOC	M5	green	arginine_feature1	Amino acids and peptides	0.354595	0.0156085
HIPPOC	M5	green	PC(39:6)_feature5	PC	0.341841	0.0200611
HIPPOC	M5	green	3-(1-pyrazolyl)-alanine_feature1	Amino acids and peptides	0.257369	0.0842135
HIPPOC	M5	green	PC(O-38:3)_feature3	O-PC	0.157311	0.296445
HIPPOC	M6	red	PC(30:0)_feature1	PC	0.941023	2.48114e-22
HIPPOC	M6	red	PC(40:4)_feature2	PC	0.93938	4.46448e-22
HIPPOC	M6	red	PC(31:1)_feature3	PC	0.926557	2.66351e-20
HIPPOC	M6	red	PE(36:4)>PE(16:0_20:4)_feature3	PE	0.923956	5.57494e-20
HIPPOC	M6	red	PE(38:6)_feature3	PE	0.897971	2.73231e-17
HIPPOC	M6	red	PC(O-40:7)_feature3	O-PC	0.894495	5.50483e-17
HIPPOC	M6	red	PC(40:6)_feature3	PC	0.89447	5.53126e-17
HIPPOC	M6	red	PE(40:6)_feature3	PE	0.890398	1.21876e-16
HIPPOC	M6	red	PE(34:1)_feature1	PE	0.889306	1.49845e-16
HIPPOC	M6	red	PC(42:6)_feature4	PC	0.869675	4.41398e-15
HIPPOC	M6	red	PC(38:6)_feature2	PC	0.862493	1.33046e-14
HIPPOC	M6	red	LPE(18:0/0:0)_feature2	LPE	0.861045	1.64959e-14
HIPPOC	M6	red	PC(39:6)_feature3	PC	0.853512	4.86021e-14
HIPPOC	M6	red	PE(O-38:4)_feature3	O-PE	0.849267	8.70393e-14
HIPPOC	M6	red	PE(O-40:7)>PE(O-18:1/22:6)_feature7	O-PE	0.833684	6.40307e-13
HIPPOC	M6	red	PG(38:4)>PG(18:0_20:4)_feature3	PG	0.827659	1.31192e-12
HIPPOC	M6	red	PG(38:6)>PG(16:0_22:6)_feature2	PG	0.825388	1.70701e-12
HIPPOC	M6	red	PC(32:1)_feature1	PC	0.816373	4.68124e-12
HIPPOC	M6	red	PE(O-40:4)_feature4	O-PE	0.812275	7.27278e-12
HIPPOC	M6	red	SM(d32:1)_feature1	SM	0.798386	3.00047e-11
HIPPOC	M6	red	PE(40:4)>PE(18:0_22:4)_feature4	PE	0.795941	3.80712e-11
HIPPOC	M6	red	PC(O-38:7)_feature7	O-PC	0.792857	5.11793e-11
HIPPOC	M6	red	PC(37:2)_feature3	PC	0.790456	6.42154e-11
HIPPOC	M6	red	PE(38:4)>PE(18:0_20:4)_feature4	PE	0.772439	3.22432e-10
HIPPOC	M6	red	PC(37:6)_feature1	PC	0.763554	6.77726e-10
HIPPOC	M6	red	PC(38:4)_feature3	PC	0.759979	9.05561e-10
HIPPOC	M6	red	LPC(16:0/0:0)_and_LPC(0:0/16:0)_feature1and2	LPC	0.744321	3.04618e-09
HIPPOC	M6	red	PC(28:0)_feature1	PC	0.730236	8.43976e-09
HIPPOC	M6	red	PC(38:4)_feature4	PC	0.726651	1.08298e-08
HIPPOC	M6	red	PC(39:5)_feature10	PC	0.725241	1.19333e-08
HIPPOC	M6	red	PC(41:6)_feature3	PC	0.723529	1.34144e-08
HIPPOC	M6	red	PC(31:0)_feature2	PC	0.718677	1.86023e-08
HIPPOC	M6	red	PC(42:6)_feature3	PC	0.69693	7.44061e-08
HIPPOC	M6	red	PC(32:2)_feature3	PC	0.693926	8.92579e-08
HIPPOC	M6	red	PC(38:3)_feature3	PC	0.662638	5.25751e-07
HIPPOC	M6	red	PC(36:2)_feature3	PC	0.628135	2.96404e-06
HIPPOC	M6	red	PC(36:3)_feature3	PC	0.619112	4.50326e-06
HIPPOC	M6	red	PC(O-30:0)_feature1	O-PC	0.601486	9.82737e-06
HIPPOC	M6	red	HexCer(d41:2-OH)>HexCer(d18:2/23:0-OH)_feature2	HexCer	0.582385	2.17594e-05
HIPPOC	M6	red	SM(d35:1)_feature1	SM	0.581841	2.22415e-05
HIPPOC	M6	red	PC(32:1)_feature2	PC	0.570329	3.50423e-05
HIPPOC	M6	red	LPC(18:0)>LPC(18:0/0:0)_and_LPC(0:0/18:0)feature1and2	LPC	0.564207	4.43203e-05
HIPPOC	M6	red	PE(36:5)_feature4	PE	0.550352	7.41623e-05
HIPPOC	M6	red	SM(d34:0)_feature1	SM	0.536549	0.00012115
HIPPOC	M6	red	PC(O-36:0)_feature1	O-PC	0.524239	0.000184403
HIPPOC	M6	red	PC(O-42:6)_feature4	O-PC	0.520826	0.000206597
HIPPOC	M6	red	SM(d41:2)_feature2and3	SM	0.502591	0.000371679
HIPPOC	M6	red	PC(O-34:1)>PC(O-18:1/16:0)_feature4	O-PC	0.46395	0.0011637
HIPPOC	M6	red	PC(33:0)_feature4	PC	0.43776	0.00234638
HIPPOC	M6	red	PC(37:4)_feature5	PC	0.376351	0.009942
HIPPOC	M6	red	PC(39:4)_feature5	PC	0.334022	0.0232869
HIPPOC	M7	black	Sulfatide(d42:2)>Sulfatide(d18:1/24:1)_feature1	SHexCer	0.90796	3.1455e-18
HIPPOC	M7	black	Sulfatide(d42:2)_feature1	SHexCer	0.901415	1.33114e-17
HIPPOC	M7	black	Sulfatide(d43:2)_feature1	SHexCer	0.891397	1.00686e-16
HIPPOC	M7	black	HexCer(d42:2-OH)>HexCer(d18:1/24:1-OH)_feature1	HexCer	0.869199	4.75888e-15
HIPPOC	M7	black	Sulfatide(d42:2-OH)_feature1	SHexCer	0.852879	5.30691e-14
HIPPOC	M7	black	HexCer(d42:2)>HexCer(d18:1/24:1)_feature1	HexCer	0.842391	2.15586e-13
HIPPOC	M7	black	Hex2Cer(d42:1)>Hex2Cer(d18:1/24:0)_feature1	Hex2Cer	0.793954	4.60947e-11
HIPPOC	M7	black	Sulfatide(d40:2)_feature1	SHexCer	0.790295	6.51928e-11
HIPPOC	M7	black	PA(34:1)>PA(16:0_18:1)_feature1	PA	0.785133	1.051e-10
HIPPOC	M7	black	Sulfatide(d42:1)_feature1	SHexCer	0.781095	1.51329e-10
HIPPOC	M7	black	Sulfatide(d38:1)_feature1	SHexCer	0.779264	1.78099e-10
HIPPOC	M7	black	Cer(d41:1)>Cer(d18:1/23:0)_feature1	Cer	0.778581	1.89176e-10
HIPPOC	M7	black	HexCer(d38:1-OH)>HexCer(d18:1/20:0-OH)_feature1	HexCer	0.771539	3.48138e-10
HIPPOC	M7	black	SM(d43:2)_feature2	SM	0.755779	1.26499e-09
HIPPOC	M7	black	HexCer(d42:3)>HexCer(d18:1/24:2)_feature2	HexCer	0.75121	1.80607e-09
HIPPOC	M7	black	Cer(d41:2)>Cer(d18:1/23:1)_feature1	Cer	0.749349	2.08334e-09
HIPPOC	M7	black	HexCer(d41:1-OH)>HexCer(d18:1/23:0-OH)_feature2	HexCer	0.738212	4.77686e-09
HIPPOC	M7	black	HexCer(d42:1)_feature1	HexCer	0.726234	1.1146e-08
HIPPOC	M7	black	Sulfatide(d44:2)_feature1	SHexCer	0.722208	1.46733e-08
HIPPOC	M7	black	Cer(d40:2)_feature2	Cer	0.715223	2.33812e-08
HIPPOC	M7	black	PS(38:2)>PS(20:1_18:1)_feature1	PS	0.686317	1.40163e-07
HIPPOC	M7	black	PA(38:4)>PA(18:0_22:4)_feature1	PA	0.678808	2.15975e-07
HIPPOC	M7	black	PA(36:1)>PA(18:0_18:1)_feature1	PA	0.678276	2.22586e-07
HIPPOC	M7	black	Sulfatide(d36:1)_feature1	SHexCer	0.660424	5.91385e-07
HIPPOC	M7	black	SM(d42:0)_feature1	SM	0.647185	1.17169e-06
HIPPOC	M7	black	PA(34:1)_feature2	PA	0.62174	3.99208e-06
HIPPOC	M7	black	HexCer(d44:2-OH)>HexCer(d18:1/26:1-OH)_and_HexCer(d20:1/24:1-OH)_feature2	HexCer	0.585821	1.89301e-05
HIPPOC	M7	black	HexCer(d42:2-OH)>HexCer(d18:1/24:1-OH)_feature2	HexCer	0.571152	3.39398e-05
HIPPOC	M7	black	PS(38:4)>PS(18:0_20:4)_feature2	PS	0.556214	5.98117e-05
HIPPOC	M7	black	PS(38:3)_feature3	PS	0.540434	0.000105749
HIPPOC	M7	black	HexCer(d44:1-OH)>HexCer(d18:1/26:0)_feature1	HexCer	0.539	0.000111212
HIPPOC	M7	black	HexCer(d42:1-OH)>HexCer(d18:1/24:0-OH)_feature2	HexCer	0.53677	0.000120221
HIPPOC	M7	black	PC(33:0)_feature6	PC	0.533552	0.0001344
HIPPOC	M7	black	HexCer(d40:2)_feature3	HexCer	0.515195	0.000248549
HIPPOC	M7	black	Cer(d43:2)>Cer(d18:1/25:1)_feature1	Cer	0.467601	0.00105065
HIPPOC	M7	black	HexCer(d43:2)>HexCer(d18:1/25:1)_feature1	HexCer	0.430331	0.00283481
HIPPOC	M7	black	Cer(d42:2)>Cer(d18:1/24:1)_feature3	Cer	0.413299	0.00430583
HIPPOC	M7	black	HexCer(t42:0)>HexCer(t18:0_24:0-OH)_feature1	HexCer	0.395129	0.00657352
HIPPOC	M7	black	carnitine_feature1	Carnitines	0.366436	0.0122558
HIPPOC	M7	black	Car(3:0)_feature1	Car	0.318111	0.0312035
HIPPOC	M7	black	HexCer(d42:3)>HexCer(d18:1/24:2)_feature4	HexCer	0.270274	0.0692766
HIPPOC	M8	pink	PC(36:2)_feature5	PC	0.873707	2.30808e-15
HIPPOC	M8	pink	Sulfatide(d40:1-OH)_feature1	SHexCer	0.855709	3.56895e-14
HIPPOC	M8	pink	Sulfatide(d41:1-OH)_feature1	SHexCer	0.853695	4.73771e-14
HIPPOC	M8	pink	Sulfatide(d42:1-OH)_feature1	SHexCer	0.852586	5.52742e-14
HIPPOC	M8	pink	PE(36:4)>PE(16:0_20:4)_feature5	PE	0.842458	2.1374e-13
HIPPOC	M8	pink	PC(34:4)_feature5	PC	0.837028	4.24688e-13
HIPPOC	M8	pink	PS(38:4)>PS(18:0_20:4)_feature6	PS	0.826659	1.47372e-12
HIPPOC	M8	pink	Sulfatide(d43:1)_feature1	SHexCer	0.776683	2.23454e-10
HIPPOC	M8	pink	Sulfatide(d44:1)_feature1	SHexCer	0.771459	3.50521e-10
HIPPOC	M8	pink	PE(38:5)>PE(18:1_20:4)_feature7	PE	0.759591	9.34226e-10
HIPPOC	M8	pink	Sulfatide(d41:1)_feature1	SHexCer	0.748889	2.15786e-09
HIPPOC	M8	pink	SM(d38:4)_feature2	SM	0.726233	1.11465e-08
HIPPOC	M8	pink	PC(39:1)_feature1	PC	0.705248	4.44305e-08
HIPPOC	M8	pink	PS(36:1)_feature1	PS	0.700051	6.14457e-08
HIPPOC	M8	pink	HexCer(d40:1-OH)>HexCer(d18:1/22:0-OH)_feature1	HexCer	0.685165	1.49898e-07
HIPPOC	M8	pink	PC(40:4)_feature3	PC	0.683005	1.69874e-07
HIPPOC	M8	pink	EA(22:0)_feature1	Fatty amides	0.668681	3.79448e-07
HIPPOC	M8	pink	HexCer(d40:2)>HexCer(d18:1/22:1)_feature3	HexCer	0.666738	4.2173e-07
HIPPOC	M8	pink	EA(20:0)_feature1	Fatty amides	0.653465	8.50693e-07
HIPPOC	M8	pink	cholesterol_feature1	Sterols	0.607231	7.65962e-06
HIPPOC	M8	pink	PS(40:7)_feature2	PS	0.604294	8.70562e-06
HIPPOC	M8	pink	EA(15:0)_feature1	Fatty amides	0.593616	1.37198e-05
HIPPOC	M8	pink	Hex2Cer(d38:3)_feature1	Hex2Cer	0.568713	3.73003e-05
HIPPOC	M8	pink	HexCer(d40:1-OH)>HexCer(d18:1/22:0-OH)_feature2	HexCer	0.557693	5.66176e-05
HIPPOC	M8	pink	PE(38:4)>PE(18:0_20:4)_feature8	PE	0.534628	0.000129495
HIPPOC	M8	pink	EA(18:0)_feature1	Fatty amides	0.51409	0.000257639
HIPPOC	M8	pink	Hex2Cer(d40:3)_feature1	Hex2Cer	0.510551	0.000288799
HIPPOC	M8	pink	SM(d37:1)_feature1	SM	0.499981	0.000403192
HIPPOC	M8	pink	PC(O-40:6)_feature6	O-PC	0.487836	0.000583906
HIPPOC	M8	pink	PS(36:1)>PS(18:0_18:1)_feature1	PS	0.46735	0.00105808
HIPPOC	M8	pink	PC(36:0)>PC(18:0/18:0)_feature3	PC	0.431679	0.00274002
HIPPOC	M8	pink	Eucramide Dimer_feature1	Fatty amines	0.422139	0.00347527
HIPPOC	M8	pink	PC(35:3)_feature3	PC	0.347555	0.0179494
HIPPOC	M8	pink	Cer(d41:2)>Cer(d18:2/23:0)_feature2	Cer	0.298996	0.0435372
HIPPOC	M8	pink	HexCer(d40:2)>HexCer(d18:1/22:1)_feature1	HexCer	0.249727	0.0941791
HIPPOC	M8	pink	HexCer(d41:2)_feature1	HexCer	0.162787	0.279733
HIPPOC	M8	pink	PE(36:2)>PE(18:2_18:0)_feature4	PE	0.07139	0.637307
HIPPOC	M8	pink	PC(35:1)_feature1	PC	0.0621365	0.681638
HIPPOC	M9	magenta	PE(O-36:3)>PE(O-18:2/18:1)_feature3	O-PE	0.929915	9.84971e-21
HIPPOC	M9	magenta	Car(16:1)_feature1	Car	0.926474	2.72846e-20
HIPPOC	M9	magenta	LPE(O-18:2)_feature1	O-LPE	0.909212	2.35784e-18
HIPPOC	M9	magenta	Car(14:0)_feature1	Car	0.897634	2.92778e-17
HIPPOC	M9	magenta	PC(44:5)_feature1	PC	0.896592	3.61802e-17
HIPPOC	M9	magenta	Car(17:1)_feature1	Car	0.89253	8.09095e-17
HIPPOC	M9	magenta	Car(14:1)_feature1	Car	0.875271	1.78438e-15
HIPPOC	M9	magenta	Car(18:1)_feature1	Car	0.867772	5.95041e-15
HIPPOC	M9	magenta	PE(O-38:3)>PE(O-18:2/20:1)_feature3	O-PE	0.854025	4.52389e-14
HIPPOC	M9	magenta	PC(O-38:2)_feature2	O-PC	0.851893	6.08268e-14
HIPPOC	M9	magenta	Car(12:0)_feature2	Car	0.837136	4.19061e-13
HIPPOC	M9	magenta	PC(O-36:4)_feature4	O-PC	0.79492	4.20115e-11
HIPPOC	M9	magenta	HexCer(d42:3)_feature3	HexCer	0.784434	1.1201e-10
HIPPOC	M9	magenta	PE(O-36:4)_feature1	O-PE	0.754343	1.41595e-09
HIPPOC	M9	magenta	PC(42:5)_feature6	PC	0.753146	1.55461e-09
HIPPOC	M9	magenta	PE(O-36:2)>PE(O-18:1/18:1)_feature1	O-PE	0.752976	1.57528e-09
HIPPOC	M9	magenta	PC(O-40:6)_feature5	O-PC	0.7403	4.10183e-09
HIPPOC	M9	magenta	PE(O-36:4)>PE(O-16:1/20:3)_feature2	O-PE	0.710134	3.25513e-08
HIPPOC	M9	magenta	PC(35:2)_feature1	PC	0.691955	1.00456e-07
HIPPOC	M9	magenta	PC(O-36:2)_feature1	O-PC	0.685486	1.47122e-07
HIPPOC	M9	magenta	PC(37:2)_feature1	PC	0.681712	1.82992e-07
HIPPOC	M9	magenta	PC(O-34:2)_feature1	O-PC	0.680022	2.01563e-07
HIPPOC	M9	magenta	PE(36:2)>PE(18:2_18:0)_feature3	PE	0.678202	2.23517e-07
HIPPOC	M9	magenta	PE(O-34:5)>PE(O-17:1/20:4)_feature2	O-PE	0.651485	9.41778e-07
HIPPOC	M9	magenta	PC(O-38:4)_feature4	O-PC	0.641849	1.52935e-06
HIPPOC	M9	magenta	PE(O-38:6)>PE(O-18:2/20:4)_and_PE(O-16:1/22:5)_feature2	O-PE	0.584342	2.01042e-05
HIPPOC	M9	magenta	PE(O-38:5)>PE(O-18:1/20:4)_feature3	O-PE	0.533618	0.000134094
HIPPOC	M9	magenta	PE(O-36:4)>PE(O-16:0/20:4)_feature1	O-PE	0.532292	0.000140348
HIPPOC	M9	magenta	SM(d42:3)_feature2	SM	0.525398	0.000177375
HIPPOC	M9	magenta	LPE(18:1)>LPE(18:1/0:0)feature2	LPE	0.494128	0.000482798
HIPPOC	M9	magenta	LPE(18:1)>LPE(0:0/18:1)feature1	LPE	0.447306	0.00182875
HIPPOC	M9	magenta	PC(36:2)>PC(18:1/18:1)_feature2	PC	0.436277	0.00243743
HIPPOC	M9	magenta	PE(O-38:4)>PE(O-18:0/20:4)_and_PE(O-18:2/20:2)_feature4	O-PE	0.344113	0.0191975
HIPPOC	M9	magenta	LPC(18:1)>LPC(18:1/0:0)feature2	LPC	0.321464	0.0293718
HIPPOC	NA	grey	PC(36:3)_feature1	PC	0.841784	2.33088e-13
HIPPOC	NA	grey	PC(38:3)>PC(18:0_20:3)_feature3	PC	-0.792048	5.52641e-11
HIPPOC	NA	grey	PE(38:3)>PE(18:0_20:3)_feature1	PE	0.783475	1.22184e-10
HIPPOC	NA	grey	PC(38:3)_feature1	PC	0.764817	6.10993e-10
HIPPOC	NA	grey	PC(32:0)_feature1	PC	0.762155	7.59578e-10
HIPPOC	NA	grey	PC(39:5)_feature1	PC	-0.746606	2.56592e-09
HIPPOC	NA	grey	PE(36:3)>PE(16:0_20:3)_and_PE(36:3)>PE(18:1_18:2)_feature2	PE	-0.721843	1.50395e-08
HIPPOC	NA	grey	PC(33:0)_feature1	PC	0.70167	5.55839e-08
HIPPOC	NA	grey	PC(33:3)_feature3	PC	0.696584	7.59894e-08
HIPPOC	NA	grey	Car(2:0)_feature1	Car	0.670495	3.43553e-07
HIPPOC	NA	grey	PC(40:5)>PC(18:0_22:5)_feature4	PC	0.611134	6.44859e-06
HIPPOC	NA	grey	PC(38:3)_feature4	PC	-0.565224	4.26375e-05
HIPPOC	NA	grey	PE(O-40:8)>PE(O-22:8/18:0)_and_PE(O-18:2/22:6)_feature2	O-PE	-0.559143	5.36372e-05
HIPPOC	NA	grey	SM(d38:0)_feature1	SM	-0.503149	0.000365232
HIPPOC	NA	grey	LPC(22:4)>LPC(22:4/0:0)_and_LPC(0:0/22:4)feature1and2	LPC	0.494806	0.000472907
HIPPOC	NA	grey	PE(36:3)>PE(18:1_18:2)_feature1	PE	-0.465024	0.00112939
HIPPOC	NA	grey	PE(38:5)_feature5	PE	0.458591	0.00134935
HIPPOC	NA	grey	LPC(20:4)>LPC(20:4/0:0)_and_LPC(0:0/20:4)feature1and2	LPC	0.44761	0.00181408
HIPPOC	NA	grey	PE(38:3)>PE(18:0_20:3)_feature2	PE	-0.447283	0.00182983
HIPPOC	NA	grey	PC(33:0)_feature5	PC	-0.439692	0.00223225
HIPPOC	NA	grey	LPC(22:6)>LPC(22:6/0:0)_and_LPC(0:0/22:6)feature1and2	LPC	0.412612	0.00437711
HIPPOC	NA	grey	PC(O-36:3)_feature2	O-PC	-0.376921	0.00982141
HIPPOC	NA	grey	PC(35:2)_feature4	PC	-0.365116	0.0125962
HIPPOC	NA	grey	9S-HpODE	Oxylipin	-0.304104	0.0399067
HIPPOC	NA	grey	LPC(16:1)>LPC(16:1/0:0)_and_LPC(0:0/16:1)feature1and2	LPC	0.300053	0.0427646
HIPPOC	NA	grey	LPC(18:1)>LPC(18:1/0:0)_and_LPC(0:0/18:1)_feature1	LPC	0.298165	0.0441527
HIPPOC	NA	grey	PC(37:3)_feature4	PC	-0.296887	0.0451128
HIPPOC	NA	grey	LPC(18:1)>LPC(0:0/18:1)feature1	LPC	0.295614	0.0460865
HIPPOC	NA	grey	PE(32:1)>PE(16:0_16:1)_feature1	PE	-0.293858	0.047457
HIPPOC	NA	grey	HexCer(d42:1-OH)>HexCer(d18:1/24:0-OH)_feature1	HexCer	0.264103	0.0761333
HIPPOC	NA	grey	PE(O-36:4)>PE(O-16:1/20:3)_feature3	O-PE	-0.256379	0.0854561
HIPPOC	NA	grey	HexCer(d42:2)>HexCer(d18:2/24:0)_feature2	HexCer	0.253511	0.089136
HIPPOC	NA	grey	Behenoyl-EA	NAE	-0.252202	0.090856
HIPPOC	NA	grey	PE(O-40:6)>PE(O-18:1/22:5)_feature5	O-PE	0.230308	0.123605
HIPPOC	NA	grey	SM(d42:1)_feature2	SM	0.22857	0.126543
HIPPOC	NA	grey	PC(40:5)_feature4	PC	0.225896	0.131164
HIPPOC	NA	grey	12-HETE	Oxylipin	-0.220937	0.140069
HIPPOC	NA	grey	HexCer(d41:2-OH)_feature2	HexCer	0.219282	0.14314
HIPPOC	NA	grey	PC(O-40:4)_feature2	O-PC	-0.204023	0.173822
HIPPOC	NA	grey	13-Oxo-ODE	Oxylipin	-0.19759	0.188087
HIPPOC	NA	grey	13-HODE	Oxylipin	-0.187838	0.21127
HIPPOC	NA	grey	PE(34:2)>PE(16:0_18:2)_feature2	PE	-0.184449	0.219775
HIPPOC	NA	grey	9-HOTrE	Oxylipin	-0.178484	0.235313
HIPPOC	NA	grey	SM(d40:1)_feature2	SM	0.172581	0.251415
HIPPOC	NA	grey	PC(O-40:3)_feature1	O-PC	-0.172054	0.252888
HIPPOC	NA	grey	DG(40:4)_feature2	DAG	0.171991	0.253063
HIPPOC	NA	grey	PS(36:2)_feature2	PS	0.162016	0.282048
HIPPOC	NA	grey	PE(O-40:4)_feature2	O-PE	-0.149972	0.319831
HIPPOC	NA	grey	HexCer(d42:2)>HexCer(d18:1/24:1)_feature4	HexCer	0.139146	0.356395
HIPPOC	NA	grey	SM(d38:3)_feature1	SM	0.136521	0.365629
HIPPOC	NA	grey	PE(34:2)_feature2	PE	-0.134427	0.373096
HIPPOC	NA	grey	PC(34:1)_feature2	PC	-0.128425	0.395001
HIPPOC	NA	grey	Car(18:0)_feature1	Car	-0.127497	0.398456
HIPPOC	NA	grey	LPC(16:0)>LPC(16:0/0:0)_and_LPC(0:0/16:0)_feature2	LPC	0.122372	0.41784
HIPPOC	NA	grey	SM(d44:2)_feature1	SM	0.117495	0.436771
HIPPOC	NA	grey	Cer(d41:1)_feature1	Cer	0.106949	0.479298
HIPPOC	NA	grey	DG(36:1)>DG(18:0_18:1_0:0)_feature2	DAG	0.0998004	0.509317
HIPPOC	NA	grey	PC(37:3)_feature3	PC	-0.0943492	0.532831
HIPPOC	NA	grey	PE(36:1)>PE(18:0_18:1)_feature1	PE	0.0895441	0.553988
HIPPOC	NA	grey	Cer(d42:1)_feature3	Cer	0.0871296	0.564767
HIPPOC	NA	grey	20-HETE	Oxylipin	0.0826539	0.585001
HIPPOC	NA	grey	TG(58:1)>TG(16:0_18:1_24:0)_and_TG(16:0_16:0_26:1)_and_TG(18:0_18:1_22:0)_feature1	TAG	-0.0772039	0.61007
HIPPOC	NA	grey	PC(O-38:6)_feature5	O-PC	0.0754681	0.618149
HIPPOC	NA	grey	Arachidonoyl-EA	NAE	0.0674498	0.656042
HIPPOC	NA	grey	SM(d40:2)_feature2	SM	-0.0606144	0.689038
HIPPOC	NA	grey	PA(38:4)>PA(18:0_20:4)_feature1	PA	0.032492	0.830264
HIPPOC	NA	grey	SM(d41:1)_feature1	SM	0.0281602	0.852623
HIPPOC	NA	grey	PC(39:4)_feature6	PC	-0.0248461	0.869808
HIPPOC	NA	grey	9,10-DiHOME	Oxylipin	-0.0245272	0.871465
HIPPOC	NA	grey	PC(39:4)_feature3	PC	0.018207	0.904406
HIPPOC	NA	grey	PE(37:4)>PE(17:0_20:4)_feature2	PE	0.0173624	0.908821
HIPPOC	NA	grey	SM(d42:3)_feature1	SM	0.0147107	0.922701
HIPPOC	NA	grey	PE(40:5)_feature3	PE	-0.0113008	0.940582
HIPPOC	NA	grey	PC(33:1)_feature1	PC	-0.00203151	0.989309
KIDNEY	M1	turquoise	TG(54:2)>TG(16:0_18:1_20:1)_and_TG(18:0_18:1_18:1)_feature3	TAG	0.964799	6.54029e-29
KIDNEY	M1	turquoise	TG(53:5)>TG(17:1_18:2_18:2)_feature1	TAG	0.958876	2.36902e-27
KIDNEY	M1	turquoise	TG(51:4)>TG(16:1_17:1_18:2)_and_TG(15:0_18:2_18:2)_and_TG(15:1_18:1_18:2)_feature1	TAG	0.956622	8.0967e-27
KIDNEY	M1	turquoise	TG(55:5)>TG(18:2_18:2_19:1)_and_TG(18:1_18:2_19:2)_feature2	TAG	0.95422	2.79753e-26
KIDNEY	M1	turquoise	TG(51:1)_feature3	TAG	0.95391	3.26753e-26
KIDNEY	M1	turquoise	TG(51:3)>TG(15:0_18:1_18:2)_and_TG(16:0_17:1_18:2)_and_TG(16:1_17:1_18:1)_feature3	TAG	0.953579	3.85251e-26
KIDNEY	M1	turquoise	TG(54:7)>TG(18:2_18:2_18:3)_feature3	TAG	0.952899	5.37987e-26
KIDNEY	M1	turquoise	TG(52:1)>TG(16:0_18:0_18:1)_and_TG(16:0_16:0_20:1)_feature3	TAG	0.950785	1.47507e-25
KIDNEY	M1	turquoise	TG(56:6)>TG(18:1_18:1_20:4)_and_TG(16:0_18:1_22:5)_and_TG(18:1_18:2_20:3)_feature3	TAG	0.946361	1.06181e-24
KIDNEY	M1	turquoise	TG(47:3)_feature2	TAG	0.944724	2.11382e-24
KIDNEY	M1	turquoise	TG(52:4)>TG(16:1_18:1_18:2)_feature5	TAG	0.942742	4.7313e-24
KIDNEY	M1	turquoise	TG(52:5)>TG(16:0_18:2_18:3)_feature4	TAG	0.942587	5.03254e-24
KIDNEY	M1	turquoise	TG(49:2)_feature3	TAG	0.941763	6.97039e-24
[truncated: 3,973 more rows]

## Sheet: S2 - WGCNA2
WGCNA module ORA results
Tissue	moduleNumber	moduleColor	Classifier	Count.query	Query.size	Count.universe	Universe.size	%.query	%.universe	p-value	FDR.q-value	Fold.change
LUNG	M1	turquoise	TAG	135	140	150	724	96.4286	20.7182	1.67e-69	2.34e-68	4.65429
KIDNEY	M1	turquoise	TAG	122	128	183	712	95.3125	25.7022	1.08e-53	1.62e-52	3.70833
SKM-GN	M1	turquoise	TAG	112	116	141	490	96.5517	28.7755	6.76e-45	8.11e-44	3.35534
HEART	M7	black	Car	30	30	41	590	100	6.94915	8.77e-32	1.05e-30	14.3902
PLASMA	M1	turquoise	TAG	118	163	131	585	72.3926	22.3932	1.44e-31	1.72e-30	3.2328
LIVER	M9	magenta	Car	26	28	36	630	92.8571	5.71429	2.51e-27	3.26e-26	16.25
HEART	M6	red	TAG	43	43	130	590	100	22.0339	8.52e-27	1.02e-25	4.53846
LIVER	M1	turquoise	TAG	65	76	150	630	85.5263	23.8095	3.58e-26	4.65e-25	3.59211
LUNG	M7	black	Car	19	19	34	724	100	4.69613	5.16e-24	7.23e-23	21.2941
LIVER	M5	green	TAG	41	43	150	630	95.3488	23.8095	6.73e-22	8.75e-21	4.00465
PLASMA	M5	green	Car	21	29	38	585	72.4138	6.49573	2.72e-17	3.26e-16	11.1479
HEART	M3	brown	TAG	35	40	130	590	87.5	22.0339	4.6e-17	5.52e-16	3.97115
BAT	M1	turquoise	TAG	68	85	214	633	80	33.8073	3.67e-16	4.4e-15	2.36636
HEART	M8	pink	TAG	26	27	130	590	96.2963	22.0339	1.19e-15	1.43e-14	4.37037
LUNG	M8	pink	PI	12	19	13	724	63.1579	1.79558	4.32e-15	6.04e-14	35.1741
PLASMA	M6	red	O-PE	14	19	27	585	73.6842	4.61538	3.88e-14	4.66e-13	15.9649
PLASMA	M2	blue	SM	34	124	44	585	27.4194	7.52137	7.24e-09	8.68e-08	3.64553
LIVER	M3	brown	PC	38	63	155	630	60.3175	24.6032	1.41e-08	1.83e-07	2.45161
HIPPOC	M7	black	SHexCer	8	18	16	586	44.4444	2.73038	6.02e-08	7.83e-07	16.2778
LIVER	M8	pink	PC	22	30	155	630	73.3333	24.6032	6.81e-08	8.85e-07	2.98065
PLASMA	M3	brown	PC	21	28	156	585	75	26.6667	2.98e-07	3.58e-06	2.8125
PLASMA	M2	blue	O-PC	31	124	49	585	25	8.37607	1.13e-06	6.79e-06	2.98469
PLASMA	M8	pink	PC	11	11	156	585	100	26.6667	6.55e-07	7.86e-06	3.75
LUNG	M2	blue	PC	24	38	171	724	63.1579	23.6188	5.74e-07	8.03e-06	2.67405
SKM-GN	M3	brown	HexCer	9	38	10	490	23.6842	2.04082	1.09e-06	1.31e-05	11.6053
BAT	M9	magenta	O-PE	7	10	43	633	70	6.79305	1.14e-06	1.37e-05	10.3047
LUNG	M8	pink	PS	7	19	22	724	36.8421	3.03867	2.37e-06	1.66e-05	12.1244
HEART	M2	blue	PC	23	37	144	590	62.1622	24.4068	2.95e-06	3.54e-05	2.54692
SKM-GN	M5	green	PE	13	27	52	490	48.1481	10.6122	3.05e-06	3.67e-05	4.53704
HIPPOC	M8	pink	SHexCer	6	14	16	586	42.8571	2.73038	2.94e-06	3.82e-05	15.6964
LIVER	M7	black	SM	12	37	37	630	32.4324	5.87302	3e-06	3.91e-05	5.52228
WAT-SC	M4	yellow	TAG	28	38	187	528	73.6842	35.4167	4.11e-06	5.34e-05	2.0805
SKM-GN	M4	yellow	PE	13	29	52	490	44.8276	10.6122	8.06e-06	9.67e-05	4.22414
HIPPOC	M9	magenta	Car	6	17	15	586	35.2941	2.55973	8.11e-06	0.000105382	13.7882
BAT	M2	blue	PC	30	73	112	633	41.0959	17.6935	1.08e-05	0.000129567	2.32265
SKM-GN	M7	black	O-PC	8	17	33	490	47.0588	6.73469	1.31e-05	0.000157393	6.98752
PLASMA	M4	yellow	PC	20	32	156	585	62.5	26.6667	4.05e-05	0.000486506	2.34375
LIVER	M4	yellow	O-PC	11	43	34	630	25.5814	5.39683	4.11e-05	0.000534289	4.74008
BAT	M8	pink	TAG	13	15	214	633	86.6667	33.8073	4.72e-05	0.000566209	2.56355
WAT-SC	M8	pink	PC	8	11	85	528	72.7273	16.0985	6.32e-05	0.000822138	4.51765
BAT	M3	brown	O-PE	10	32	43	633	31.25	6.79305	7.37e-05	0.000884524	4.60029
BAT	M6	red	O-PE	8	22	43	633	36.3636	6.79305	0.000107505	0.00114061	5.35307
BAT	M6	red	O-PC	7	22	34	633	31.8182	5.37125	0.000190101	0.00114061	5.9238
SKM-GN	M3	brown	O-PE	11	38	38	490	28.9474	7.7551	0.000257652	0.00154591	3.73269
BAT	M4	yellow	PC	11	19	112	633	57.8947	17.6935	0.000138377	0.00166052	3.27209
BAT	M7	black	TAG	13	16	214	633	81.25	33.8073	0.000169951	0.00203941	2.40333
KIDNEY	M4	yellow	PC	17	31	162	712	54.8387	22.7528	0.000162963	0.00244444	2.4102
BAT	M2	blue	PE	21	73	79	633	28.7671	12.4803	0.000443503	0.00266102	2.30501
WAT-SC	M2	blue	O-PC	11	52	29	528	21.1538	5.49242	0.000327982	0.00298989	3.85146
WAT-SC	M2	blue	LPC	7	52	11	528	13.4615	2.08333	0.000459983	0.00298989	6.46154
LUNG	M5	green	O-PC	11	37	59	724	29.7297	8.14917	0.000225279	0.00315391	3.64819
KIDNEY	M9	magenta	PC	7	8	162	712	87.5	22.7528	0.000228423	0.00342635	3.84568
HIPPOC	M1	turquoise	TAG	7	36	19	586	19.4444	3.24232	0.000355055	0.00461571	5.99708
KIDNEY	M6	red	O-PC	7	20	48	712	35	6.74157	0.000333265	0.00499897	5.19167
HEART	M2	blue	PE	12	37	66	590	32.4324	11.1864	0.000834234	0.0050054	2.89926
HEART	M1	turquoise	Cer	11	67	25	590	16.4179	4.23729	0.000421476	0.00505771	3.87463
HEART	M4	yellow	O-PC	10	39	40	590	25.641	6.77966	0.000443587	0.00532305	3.78205
LIVER	M3	brown	PI	7	63	13	630	11.1111	2.06349	0.00110791	0.00720142	5.38462
WAT-SC	M2	blue	PC	18	52	85	528	34.6154	16.0985	0.00166361	0.00720898	2.15023
SKM-GN	M4	yellow	PC	16	29	128	490	55.1724	26.1224	0.00124917	0.00749502	2.11207
BAT	M5	green	TAG	20	31	214	633	64.5161	33.8073	0.000647151	0.00776581	1.90835
LUNG	M2	blue	LPC	6	38	20	724	15.7895	2.76243	0.00113598	0.00795183	5.71579
LIVER	M4	yellow	SM	9	43	37	630	20.9302	5.87302	0.00142754	0.00927902	3.5638
PLASMA	M4	yellow	LPC	9	32	49	585	28.125	8.37607	0.00155079	0.00930476	3.35778
WAT-SC	M7	black	Car	4	15	13	528	26.6667	2.46212	0.000731344	0.00950747	10.8308
BAT	M4	yellow	PE	8	19	79	633	42.1053	12.4803	0.00160168	0.00961008	3.37375
HEART	M1	turquoise	SM	12	67	37	590	17.9104	6.27119	0.00208102	0.00969807	2.85599
HEART	M1	turquoise	PC	28	67	144	590	41.791	24.4068	0.00242452	0.00969807	1.71227
SKM-GN	M2	blue	PC	15	26	128	490	57.6923	26.1224	0.000945885	0.0113506	2.20853
HIPPOC	M4	yellow	O-PE	15	45	78	586	33.3333	13.3106	0.000891335	0.0115874	2.50427
WAT-SC	M5	green	DAG	7	34	22	528	20.5882	4.16667	0.000944695	0.012281	4.94118
PLASMA	M2	blue	Cer	13	124	22	585	10.4839	3.76068	0.00358545	0.0143418	2.78776
HIPPOC	M1	turquoise	PE	11	36	66	586	30.5556	11.2628	0.00234903	0.0152687	2.71296
WAT-SC	M5	green	PC	13	34	85	528	38.2353	16.0985	0.00240127	0.0156082	2.37509
HIPPOC	M2	blue	LPC	8	48	23	586	16.6667	3.92491	0.00124086	0.0161311	4.24638
HIPPOC	M6	red	PC	16	29	155	586	55.1724	26.4505	0.00134912	0.0175386	2.08587
LUNG	M6	red	O-PE	8	25	63	724	32	8.70166	0.00127739	0.0178834	3.67746
SKM-GN	M3	brown	O-PC	8	38	33	490	21.0526	6.73469	0.00563277	0.0225311	3.126
SKM-GN	M9	magenta	PC	8	11	128	490	72.7273	26.1224	0.00190252	0.0228302	2.78409
PLASMA	M7	black	PC	6	7	156	585	85.7143	26.6667	0.00211903	0.0254283	3.21429
PLASMA	M9	magenta	PC	7	9	156	585	77.7778	26.6667	0.00226134	0.027136	2.91667
WAT-SC	M2	blue	DAG	7	52	22	528	13.4615	4.16667	0.010284	0.033423	3.23077
HIPPOC	M4	yellow	HexCer	12	45	67	586	26.6667	11.4334	0.00585636	0.0380664	2.33234
HIPPOC	M3	brown	PS	6	30	26	586	20	4.43686	0.00295632	0.0384321	4.50769
WAT-SC	M3	brown	TAG	30	54	187	528	55.5556	35.4167	0.00321693	0.0418201	1.56863
WAT-SC	M7	black	PC	7	15	85	528	46.6667	16.0985	0.00645599	0.041964	2.89882
LUNG	M4	yellow	PC	12	23	171	724	52.1739	23.6188	0.00337357	0.04723	2.209
KIDNEY	M4	yellow	PE	8	31	64	712	25.8065	8.98876	0.00667131	0.0500348	2.87097
WAT-SC	M9	magenta	PC	7	14	85	528	50	16.0985	0.00403617	0.0524703	3.10588
LIVER	M3	brown	PE	14	63	70	630	22.2222	11.1111	0.0128006	0.0554691	2
KIDNEY	M3	brown	LPC	7	62	20	712	11.2903	2.80899	0.00371999	0.0557999	4.01935
KIDNEY	M7	black	O-PC	5	16	48	712	31.25	6.74157	0.00399524	0.0599286	4.63542
LIVER	M4	yellow	O-PE	7	43	36	630	16.2791	5.71429	0.0148953	0.0645462	2.84884
WAT-SC	M5	green	Car	4	34	13	528	11.7647	2.46212	0.0151822	0.0657896	4.77828
KIDNEY	M8	pink	PC	7	11	162	712	63.6364	22.7528	0.00474585	0.0711877	2.79686
KIDNEY	M3	brown	SM	9	62	39	712	14.5161	5.47753	0.0103382	0.0775367	2.65012
LIVER	M7	black	Cer	6	37	31	630	16.2162	4.92063	0.0125858	0.0818078	3.29555
HIPPOC	M5	green	DAG	4	32	12	586	12.5	2.04778	0.00696653	0.0831832	6.10417
HIPPOC	M5	green	PC	15	32	155	586	46.875	26.4505	0.0127974	0.0831832	1.77218
PLASMA	M1	turquoise	PE	13	163	21	585	7.97546	3.58974	0.0193399	0.0834208	2.22174
PLASMA	M1	turquoise	DAG	10	163	14	585	6.13497	2.39316	0.0208552	0.0834208	2.56354
WAT-SC	M1	turquoise	O-PE	13	73	40	528	17.8082	7.57576	0.00667516	0.086777	2.35068
HIPPOC	M7	black	HexCer	6	18	67	586	33.3333	11.4334	0.0144021	0.0936136	2.91542
BAT	M9	magenta	O-PC	3	10	34	633	30	5.37125	0.0159275	0.095565	5.58529
WAT-SC	M2	blue	HexCer	4	52	11	528	7.69231	2.08333	0.0373292	0.0970559	3.69231
KIDNEY	M3	brown	O-PE	10	62	53	712	16.129	7.44382	0.0221539	0.0974578	2.16677
KIDNEY	M3	brown	Car	7	62	31	712	11.2903	4.35393	0.0259887	0.0974578	2.59313
KIDNEY	M8	pink	PE	4	11	64	712	36.3636	8.98876	0.0142414	0.10681	4.04545
LIVER	M6	red	PS	4	35	13	630	11.4286	2.06349	0.00939991	0.116929	5.53846
LIVER	M6	red	O-PE	6	35	36	630	17.1429	5.71429	0.0179891	0.116929	3
LIVER	M1	turquoise	DAG	7	76	20	630	9.21053	3.1746	0.0190894	0.124081	2.90132
KIDNEY	M2	blue	PE	10	46	64	712	21.7391	8.98876	0.00957187	0.143578	2.41848
BAT	M1	turquoise	DAG	7	85	19	633	8.23529	3.00158	0.0254998	0.152999	2.74365
SKM-GN	M8	pink	O-PE	4	12	38	490	33.3333	7.7551	0.0128304	0.153964	4.29825
HIPPOC	M2	blue	HexCer	11	48	67	586	22.9167	11.4334	0.0238403	0.154962	2.00435
HIPPOC	M7	black	Cer	3	18	23	586	16.6667	3.92491	0.0375976	0.162923	4.24638
PLASMA	M9	magenta	PI	2	9	16	585	22.2222	2.73504	0.0275477	0.165286	8.125
WAT-SC	M3	brown	O-PE	9	54	40	528	16.6667	7.57576	0.0282605	0.183693	2.2
KIDNEY	M6	red	SM	4	20	39	712	20	5.47753	0.0251195	0.188396	3.65128
BAT	M2	blue	Cer	6	73	21	633	8.21918	3.31754	0.0504435	0.201774	2.4775
LIVER	M6	red	O-PC	5	35	34	630	14.2857	5.39683	0.0470974	0.204089	2.64706
SKM-GN	M5	green	PC	12	27	128	490	44.4444	26.1224	0.0352329	0.211397	1.70139
SKM-GN	M9	magenta	O-PC	3	11	33	490	27.2727	6.73469	0.0377231	0.226339	4.04959
HEART	M3	brown	DAG	4	40	17	590	10	2.88136	0.0379894	0.227936	3.47059
LIVER	M2	blue	O-PC	6	44	34	630	13.6364	5.39683	0.0388252	0.230083	2.52674
LIVER	M2	blue	O-PE	6	44	36	630	13.6364	5.71429	0.0480227	0.230083	2.38636
LIVER	M2	blue	SM	6	44	37	630	13.6364	5.87302	0.0530962	0.230083	2.32187
WAT-SC	M5	green	Cer	4	34	23	528	11.7647	4.35606	0.0724984	0.23562	2.70077
LIVER	M7	black	PE	8	37	70	630	21.6216	11.1111	0.055351	0.239854	1.94595
HEART	M4	yellow	PC	15	39	144	590	38.4615	24.4068	0.0426205	0.255723	1.57585
LUNG	M6	red	LPC	3	25	20	724	12	2.76243	0.0374198	0.261939	4.344
WAT-SC	M3	brown	PS	4	54	13	528	7.40741	2.46212	0.0633291	0.274426	3.00855
PLASMA	M4	yellow	PI	3	32	16	585	9.375	2.73504	0.0696816	0.278726	3.42773
WAT-SC	M1	turquoise	TAG	34	73	187	528	46.5753	35.4167	0.043599	0.283394	1.31507
HIPPOC	M5	green	PE	7	32	66	586	21.875	11.2628	0.0706539	0.306167	1.94223
LUNG	M4	yellow	PE	5	23	61	724	21.7391	8.42541	0.0444243	0.31097	2.58019
LUNG	M3	brown	PE	7	33	61	724	21.2121	8.42541	0.0222283	0.311196	2.51764
BAT	M3	brown	Car	4	32	31	633	12.5	4.89731	0.0805931	0.322912	2.55242
BAT	M3	brown	O-PC	4	32	34	633	12.5	5.37125	0.10263	0.322912	2.32721
BAT	M3	brown	PC	9	32	112	633	28.125	17.6935	0.107637	0.322912	1.58956
WAT-SC	M6	red	Cer	3	14	23	528	21.4286	4.35606	0.0251127	0.326465	4.91925
SKM-GN	M2	blue	O-PE	5	26	38	490	19.2308	7.7551	0.0556365	0.333819	2.47976
WAT-SC	M9	magenta	Car	2	14	13	528	14.2857	2.46212	0.0537127	0.349133	5.8022
KIDNEY	M5	green	PC	11	26	162	712	42.3077	22.7528	0.0235231	0.352847	1.85945
HIPPOC	M4	yellow	O-PC	7	45	48	586	15.5556	8.19113	0.0853706	0.369939	1.89907
WAT-SC	M9	magenta	PE	3	14	39	528	21.4286	7.38636	0.0864173	0.374475	2.9011
KIDNEY	M2	blue	O-PE	7	46	53	712	15.2174	7.44382	0.062343	0.390749	2.0443
KIDNEY	M2	blue	HexCer	3	46	14	712	6.52174	1.96629	0.0781498	0.390749	3.31677
LIVER	M2	blue	Car	5	44	36	630	11.3636	5.71429	0.120451	0.391465	1.98864
HEART	M5	green	PC	12	29	144	590	41.3793	24.4068	0.0376119	0.43221	1.6954
HEART	M5	green	O-PE	5	29	47	590	17.2414	7.9661	0.0865475	0.43221	2.16434
HEART	M5	green	PE	6	29	66	590	20.6897	11.1864	0.108052	0.43221	1.84953
BAT	M2	blue	SM	7	73	36	633	9.58904	5.6872	0.144474	0.433421	1.68607
KIDNEY	M3	brown	Cer	4	62	22	712	6.45161	3.08989	0.147397	0.442191	2.08798
KIDNEY	M7	black	SM	3	16	39	712	18.75	5.47753	0.0591319	0.44349	3.42308
LUNG	M9	magenta	PC	4	6	171	724	66.6667	23.6188	0.031846	0.445844	2.82261
HIPPOC	M9	magenta	O-PE	5	17	78	586	29.4118	13.3106	0.0704971	0.458231	2.20965
HIPPOC	M3	brown	Cer	3	30	23	586	10	3.92491	0.127047	0.471694	2.54783
HIPPOC	M3	brown	SM	4	30	38	586	13.3333	6.48464	0.139968	0.471694	2.05614
HIPPOC	M3	brown	DAG	2	30	12	586	6.66667	2.04778	0.145137	0.471694	3.25556
PLASMA	M2	blue	O-PE	9	124	27	585	7.25806	4.61538	0.159667	0.479002	1.57258
LIVER	M2	blue	Cer	4	44	31	630	9.09091	4.92063	0.188151	0.489193	1.84751
LUNG	M3	brown	Cer	3	33	22	724	9.09091	3.03867	0.0902185	0.500829	2.99174
LUNG	M3	brown	SM	4	33	42	724	12.1212	5.8011	0.133728	0.500829	2.08947
LUNG	M3	brown	PC	11	33	171	724	33.3333	23.6188	0.143094	0.500829	1.41131
LUNG	M5	green	PC	13	37	171	724	35.1351	23.6188	0.0843419	0.50698	1.48759
LUNG	M5	green	O-PE	6	37	63	724	16.2162	8.70166	0.108639	0.50698	1.86358
SKM-GN	M6	red	LPC	2	19	13	490	10.5263	2.65306	0.10379	0.516191	3.96761
SKM-GN	M6	red	Cer	2	19	14	490	10.5263	2.85714	0.11602	0.516191	3.68421
SKM-GN	M6	red	O-PE	3	19	38	490	15.7895	7.7551	0.190774	0.516191	2.03601
SKM-GN	M6	red	SM	2	19	21	490	10.5263	4.28571	0.209735	0.516191	2.45614
SKM-GN	M6	red	PC	7	19	128	490	36.8421	26.1224	0.21508	0.516191	1.41036
BAT	M6	red	SM	3	22	36	633	13.6364	5.6872	0.137086	0.548342	2.39773
WAT-SC	M3	brown	SM	6	54	35	528	11.1111	6.62879	0.16894	0.549055	1.67619
LIVER	M3	brown	PS	3	63	13	630	4.7619	2.06349	0.17112	0.556141	2.30769
LUNG	M6	red	PC	9	25	171	724	36	23.6188	0.11982	0.559162	1.52421
KIDNEY	M2	blue	Car	4	46	31	712	8.69565	4.35393	0.156202	0.585758	1.99719
PLASMA	M5	green	O-PC	5	29	49	585	17.2414	8.37607	0.101224	0.607341	2.05841
BAT	M3	brown	PS	2	32	19	633	6.25	3.00158	0.267878	0.60943	2.08224
BAT	M3	brown	Cer	2	32	21	633	6.25	3.31754	0.304715	0.60943	1.88393
KIDNEY	M3	brown	PC	17	62	162	712	27.4194	22.7528	0.244681	0.611702	1.2051
HEART	M4	yellow	PE	7	39	66	590	17.9487	11.1864	0.153422	0.613689	1.60451
HIPPOC	M1	turquoise	PC	13	36	155	586	36.1111	26.4505	0.141994	0.615306	1.36523
LUNG	M5	green	SM	4	37	42	724	10.8108	5.8011	0.178762	0.625667	1.86358
HIPPOC	M3	brown	O-PC	4	30	48	586	13.3333	8.19113	0.241552	0.628035	1.62778
HEART	M4	yellow	O-PE	5	39	47	590	12.8205	7.9661	0.212284	0.636852	1.60938
WAT-SC	M7	black	Cer	2	15	23	528	13.3333	4.35606	0.148119	0.64185	3.06087
HEART	M9	magenta	SM	2	8	37	590	25	6.27119	0.0904459	0.653511	3.98649
HEART	M9	magenta	PC	4	8	144	590	50	24.4068	0.108918	0.653511	2.04861
LUNG	M4	yellow	O-PE	4	23	63	724	17.3913	8.70166	0.142856	0.666661	1.99862
KIDNEY	M5	green	O-PC	4	26	48	712	15.3846	6.74157	0.10311	0.666874	2.28205
KIDNEY	M5	green	O-PE	4	26	53	712	15.3846	7.44382	0.133375	0.666874	2.06676
WAT-SC	M5	green	PE	4	34	39	528	11.7647	7.38636	0.257208	0.668742	1.59276
WAT-SC	M7	black	O-PC	2	15	29	528	13.3333	5.49242	0.208832	0.678702	2.42759
SKM-GN	M2	blue	LPC	2	26	13	490	7.69231	2.65306	0.171438	0.68575	2.89941
KIDNEY	M2	blue	PS	3	46	25	712	6.52174	3.51124	0.238054	0.714161	1.85739
HIPPOC	M6	red	PE	6	29	66	586	20.6897	11.2628	0.110702	0.719564	1.83699
HIPPOC	M9	magenta	O-PC	3	17	48	586	17.6471	8.19113	0.166932	0.72337	2.15441
KIDNEY	M2	blue	DAG	2	46	16	712	4.34783	2.24719	0.299264	0.748161	1.93478
LIVER	M8	pink	PE	6	30	70	630	20	11.1111	0.118831	0.772399	1.8
KIDNEY	M1	turquoise	DAG	6	128	16	712	4.6875	2.24719	0.103218	0.774136	2.08594
KIDNEY	M6	red	PC	7	20	162	712	35	22.7528	0.15507	0.775352	1.53827
KIDNEY	M5	green	PE	4	26	64	712	15.3846	8.98876	0.211206	0.792024	1.71154
LIVER	M2	blue	PE	6	44	70	630	13.6364	11.1111	0.375621	0.813846	1.22727
LUNG	M3	brown	O-PC	4	33	59	724	12.1212	8.14917	0.291727	0.816836	1.48742
HIPPOC	M3	brown	O-PE	5	30	78	586	16.6667	13.3106	0.379167	0.821529	1.25214
HIPPOC	M8	pink	PS	2	14	26	586	14.2857	4.43686	0.13519	0.878733	3.21978
KIDNEY	M2	blue	Cer	2	46	22	712	4.34783	3.08989	0.434568	0.893716	1.40711
KIDNEY	M2	blue	SM	3	46	39	712	6.52174	5.47753	0.476648	0.893716	1.19064
KIDNEY	M3	brown	O-PC	5	62	48	712	8.06452	6.74157	0.422069	0.904433	1.19624
SKM-GN	M7	black	O-PE	3	17	38	490	17.6471	7.7551	0.150863	0.905179	2.27554
HEART	M1	turquoise	LPC	3	67	16	590	4.47761	2.71186	0.304528	0.913583	1.65112
LIVER	M6	red	LPC	2	35	18	630	5.71429	2.85714	0.284014	0.923047	2
LIVER	M6	red	PC	10	35	155	630	28.5714	24.6032	0.361465	0.939809	1.16129
LUNG	M9	magenta	Cer	1	6	22	724	16.6667	3.03867	0.175316	0.947402	5.48485
LUNG	M9	magenta	PG	1	6	26	724	16.6667	3.59116	0.203015	0.947402	4.64103
KIDNEY	M5	green	PG	1	26	10	712	3.84615	1.40449	0.32785	0.983549	2.73846
SKM-GN	M8	pink	PC	5	12	128	490	41.6667	26.1224	0.187501	1	1.59505
WAT-SC	M6	red	TAG	7	14	187	528	50	35.4167	0.198326	1	1.41176
KIDNEY	M9	magenta	LPC	1	8	20	712	12.5	2.80899	0.211782	1	4.45
WAT-SC	M4	yellow	HexCer	2	38	11	528	5.26316	2.08333	0.2149	1	2.52632
WAT-SC	M1	turquoise	SM	7	73	35	528	9.58904	6.62879	0.23775	1	1.44658
WAT-SC	M6	red	SM	2	14	35	528	14.2857	6.62879	0.246628	1	2.1551
KIDNEY	M4	yellow	SM	3	31	39	712	9.67742	5.47753	0.252799	1	1.76675
BAT	M5	green	DAG	2	31	19	633	6.45161	3.00158	0.25636	1	2.14941
SKM-GN	M7	black	PC	6	17	128	490	35.2941	26.1224	0.277492	1	1.3511
HIPPOC	M2	blue	PC	15	48	155	586	31.25	26.4505	0.285291	1	1.18145
SKM-GN	M8	pink	Cer	1	12	14	490	8.33333	2.85714	0.307983	1	2.91667
WAT-SC	M6	red	PS	1	14	13	528	7.14286	2.46212	0.30989	1	2.9011
HIPPOC	M2	blue	Cer	3	48	23	586	6.25	3.92491	0.313628	1	1.59239
BAT	M7	black	PE	3	16	79	633	18.75	12.4803	0.328771	1	1.50237
LUNG	M6	red	O-PC	3	25	59	724	12	8.14917	0.342687	1	1.47254
KIDNEY	M7	black	O-PE	2	16	53	712	12.5	7.44382	0.343959	1	1.67925
BAT	M5	green	PE	5	31	79	633	16.129	12.4803	0.353431	1	1.29236
LIVER	M4	yellow	LPC	2	43	18	630	4.65116	2.85714	0.369708	1	1.62791
KIDNEY	M7	black	LPC	1	16	20	712	6.25	2.80899	0.377053	1	2.225
BAT	M8	pink	DAG	1	15	19	633	6.66667	3.00158	0.378425	1	2.22105
WAT-SC	M8	pink	DAG	1	11	22	528	9.09091	4.16667	0.383876	1	2.18182
PLASMA	M3	brown	O-PE	2	28	27	585	7.14286	4.61538	0.386953	1	1.54762
BAT	M8	pink	Cer	1	15	21	633	6.66667	3.31754	0.407786	1	2.00952
LIVER	M5	green	DAG	2	43	20	630	4.65116	3.1746	0.41673	1	1.46512
SKM-GN	M8	pink	SM	1	12	21	490	8.33333	4.28571	0.419514	1	1.94444
HIPPOC	M1	turquoise	Cer	2	36	23	586	5.55556	3.92491	0.431587	1	1.41546
KIDNEY	M7	black	PE	2	16	64	712	12.5	8.98876	0.434164	1	1.39062
LIVER	M7	black	PC	10	37	155	630	27.027	24.6032	0.434497	1	1.09852
LUNG	M1	turquoise	DAG	4	140	17	724	2.85714	2.34807	0.450565	1	1.21681
HEART	M1	turquoise	O-PE	6	67	47	590	8.95522	7.9661	0.46071	1	1.12417
LIVER	M9	magenta	O-PC	2	28	34	630	7.14286	5.39683	0.46129	1	1.32353
PLASMA	M7	black	LPC	1	7	49	585	14.2857	8.37607	0.462584	1	1.70554
SKM-GN	M1	turquoise	DAG	4	116	14	490	3.44828	2.85714	0.462596	1	1.2069
WAT-SC	M8	pink	O-PC	1	11	29	528	9.09091	5.49242	0.470615	1	1.65517
WAT-SC	M1	turquoise	PE	6	73	39	528	8.21918	7.38636	0.472799	1	1.11275
WAT-SC	M9	magenta	Cer	1	14	23	528	7.14286	4.35606	0.473753	1	1.63975
WAT-SC	M4	yellow	SM	3	38	35	528	7.89474	6.62879	0.478538	1	1.19098
LIVER	M8	pink	PS	1	30	13	630	3.33333	2.06349	0.482082	1	1.61538
HIPPOC	M8	pink	PE	2	14	66	586	14.2857	11.2628	0.484137	1	1.2684
PLASMA	M6	red	O-PC	2	19	49	585	10.5263	8.37607	0.487868	1	1.25671
HEART	M9	magenta	O-PE	1	8	47	590	12.5	7.9661	0.49008	1	1.56915
HIPPOC	M5	green	O-PC	3	32	48	586	9.375	8.19113	0.502485	1	1.14453
SKM-GN	M3	brown	SM	2	38	21	490	5.26316	4.28571	0.504772	1	1.22807
WAT-SC	M5	green	HexCer	1	34	11	528	2.94118	2.08333	0.530711	1	1.41176
HIPPOC	M1	turquoise	DAG	1	36	12	586	2.77778	2.04778	0.54291	1	1.35648
SKM-GN	M2	blue	Cer	1	26	14	490	3.84615	2.85714	0.544578	1	1.34615
LUNG	M6	red	Cer	1	25	22	724	4	3.03867	0.54738	1	1.31636
PLASMA	M3	brown	PI	1	28	16	585	3.57143	2.73504	0.553189	1	1.3058
BAT	M1	turquoise	Cer	3	85	21	633	3.52941	3.31754	0.555935	1	1.06387
SKM-GN	M5	green	Cer	1	27	14	490	3.7037	2.85714	0.557791	1	1.2963
LIVER	M6	red	PE	4	35	70	630	11.4286	11.1111	0.560843	1	1.02857
WAT-SC	M1	turquoise	PS	2	73	13	528	2.73973	2.46212	0.562165	1	1.11275
LUNG	M3	brown	O-PE	3	33	63	724	9.09091	8.70166	0.562383	1	1.04473
HEART	M5	green	LPC	1	29	16	590	3.44828	2.71186	0.562512	1	1.27155
KIDNEY	M5	green	Cer	1	26	22	712	3.84615	3.08989	0.567295	1	1.24476
LUNG	M4	yellow	O-PC	2	23	59	724	8.69565	8.14917	0.574507	1	1.06706
WAT-SC	M8	pink	O-PE	1	11	40	528	9.09091	7.57576	0.584714	1	1.2
KIDNEY	M4	yellow	LPC	1	31	20	712	3.22581	2.80899	0.596477	1	1.14839
KIDNEY	M3	brown	PG	1	62	10	712	1.6129	1.40449	0.603342	1	1.14839
WAT-SC	M1	turquoise	DAG	3	73	22	528	4.10959	4.16667	0.604461	1	0.986301
LUNG	M3	brown	LPC	1	33	20	724	3.0303	2.76243	0.61283	1	1.09697
KIDNEY	M2	blue	O-PC	3	46	48	712	6.52174	6.74157	0.613264	1	0.967391
HIPPOC	M8	pink	SM	1	14	38	586	7.14286	6.48464	0.61389	1	1.1015
HEART	M9	magenta	PE	1	8	66	590	12.5	11.1864	0.6158	1	1.11742
SKM-GN	M6	red	PE	2	19	52	490	10.5263	10.6122	0.618436	1	0.991903
HEART	M4	yellow	PS	1	39	14	590	2.5641	2.37288	0.621426	1	1.08059
WAT-SC	M9	magenta	SM	1	14	35	528	7.14286	6.62879	0.622568	1	1.07755
LIVER	M1	turquoise	Oxylipin	2	76	17	630	2.63158	2.69841	0.625439	1	0.975232
HIPPOC	M2	blue	O-PE	6	48	78	586	12.5	13.3106	0.632632	1	0.939103
LIVER	M4	yellow	Cer	2	43	31	630	4.65116	4.92063	0.638852	1	0.945236
LUNG	M2	blue	O-PE	3	38	63	724	7.89474	8.70166	0.657099	1	0.907268
BAT	M2	blue	PS	2	73	19	633	2.73973	3.00158	0.658384	1	0.912761
LUNG	M2	blue	SM	2	38	42	724	5.26316	5.8011	0.659985	1	0.907268
WAT-SC	M6	red	PE	1	14	39	528	7.14286	7.38636	0.662752	1	0.967033
PLASMA	M3	brown	Cer	1	28	22	585	3.57143	3.76068	0.665656	1	0.949675
LIVER	M7	black	LPC	1	37	18	630	2.7027	2.85714	0.667024	1	0.945946
HEART	M4	yellow	LPC	1	39	16	590	2.5641	2.71186	0.668028	1	0.945513
BAT	M6	red	Car	1	22	31	633	4.54545	4.89731	0.673878	1	0.928152
PLASMA	M2	blue	PI	3	124	16	585	2.41935	2.73504	0.673883	1	0.884577
HEART	M1	turquoise	O-PC	4	67	40	590	5.97015	6.77966	0.677626	1	0.880597
LIVER	M6	red	DAG	1	35	20	630	2.85714	3.1746	0.684417	1	0.9
KIDNEY	M4	yellow	O-PE	2	31	53	712	6.45161	7.44382	0.685617	1	0.866707
SKM-GN	M2	blue	SM	1	26	21	490	3.84615	4.28571	0.687104	1	0.897436
WAT-SC	M3	brown	LPC	1	54	11	528	1.85185	2.08333	0.692798	1	0.888889
HIPPOC	M6	red	LPC	1	29	23	586	3.44828	3.92491	0.693355	1	0.878561
PLASMA	M3	brown	LPC	2	28	49	585	7.14286	8.37607	0.695771	1	0.85277
LUNG	M2	blue	Cer	1	38	22	724	2.63158	3.03867	0.697101	1	0.866029
HIPPOC	M6	red	O-PC	2	29	48	586	6.89655	8.19113	0.702129	1	0.841954
HIPPOC	M7	black	SM	1	18	38	586	5.55556	6.48464	0.704568	1	0.856725
LIVER	M2	blue	Oxylipin	1	44	17	630	2.27273	2.69841	0.708096	1	0.842246
LIVER	M4	yellow	Car	2	43	36	630	4.65116	5.71429	0.716321	1	0.813953
LIVER	M4	yellow	PE	4	43	70	630	9.30233	11.1111	0.71907	1	0.837209
HEART	M5	green	Cer	1	29	25	590	3.44828	4.23729	0.72032	1	0.813793
HIPPOC	M2	blue	Car	1	48	15	586	2.08333	2.55973	0.720692	1	0.813889
SKM-GN	M3	brown	PS	1	38	16	490	2.63158	3.26531	0.724774	1	0.805921
LIVER	M2	blue	LPC	1	44	18	630	2.27273	2.85714	0.727675	1	0.795455
SKM-GN	M6	red	O-PC	1	19	33	490	5.26316	6.73469	0.737682	1	0.781499
BAT	M2	blue	O-PE	4	73	43	633	5.47945	6.79305	0.739046	1	0.806626
KIDNEY	M7	black	PC	3	16	162	712	18.75	22.7528	0.741121	1	0.824074
SKM-GN	M8	pink	PE	1	12	52	490	8.33333	10.6122	0.741976	1	0.785256
KIDNEY	M2	blue	PC	9	46	162	712	19.5652	22.7528	0.747474	1	0.859903
BAT	M2	blue	O-PC	3	73	34	633	4.10959	5.37125	0.758651	1	0.765109
HIPPOC	M8	pink	PC	3	14	155	586	21.4286	26.4505	0.758744	1	0.810138
HIPPOC	M4	yellow	PE	4	45	66	586	8.88889	11.2628	0.760399	1	0.789226
HIPPOC	M6	red	O-PE	3	29	78	586	10.3448	13.3106	0.761409	1	0.777188
LIVER	M2	blue	DAG	1	44	20	630	2.27273	3.1746	0.763059	1	0.715909
HIPPOC	M5	green	PS	1	32	26	586	3.125	4.43686	0.769502	1	0.704327
KIDNEY	M5	green	SM	1	26	39	712	3.84615	5.47753	0.771151	1	0.70217
BAT	M6	red	PC	3	22	112	633	13.6364	17.6935	0.773629	1	0.770698
SKM-GN	M2	blue	PE	2	26	52	490	7.69231	10.6122	0.779586	1	0.724852
SKM-GN	M3	brown	PE	3	38	52	490	7.89474	10.6122	0.782284	1	0.743927
KIDNEY	M6	red	O-PE	1	20	53	712	5	7.44382	0.788542	1	0.671698
HEART	M2	blue	O-PE	2	37	47	590	5.40541	7.9661	0.805169	1	0.678551
PLASMA	M2	blue	PC	29	124	156	585	23.3871	26.6667	0.806479	1	0.877016
BAT	M5	green	PC	4	31	112	633	12.9032	17.6935	0.821779	1	0.729263
HEART	M8	pink	SM	1	27	37	590	3.7037	6.27119	0.827054	1	0.590591
LUNG	M5	green	PE	2	37	61	724	5.40541	8.42541	0.829717	1	0.64156
LIVER	M8	pink	O-PE	1	30	36	630	3.33333	5.71429	0.829869	1	0.583333
LIVER	M6	red	Cer	1	35	31	630	2.85714	4.92063	0.830175	1	0.580645
BAT	M1	turquoise	LPC	1	85	13	633	1.17647	2.05371	0.831571	1	0.572851
LUNG	M5	green	Car	1	37	34	724	2.7027	4.69613	0.832322	1	0.575517
HIPPOC	M4	yellow	LPC	1	45	23	586	2.22222	3.92491	0.83637	1	0.566184
LIVER	M3	brown	LPC	1	63	18	630	1.5873	2.85714	0.840552	1	0.555556
HEART	M5	green	SM	1	29	37	590	3.44828	6.27119	0.847652	1	0.54986
KIDNEY	M6	red	PE	1	20	64	712	5	8.98876	0.84826	1	0.55625
SKM-GN	M5	green	O-PC	1	27	33	490	3.7037	6.73469	0.848362	1	0.549944
WAT-SC	M5	green	O-PC	1	34	29	528	2.94118	5.49242	0.853962	1	0.535497
HIPPOC	M6	red	SM	1	29	38	586	3.44828	6.48464	0.85717	1	0.53176
HIPPOC	M3	brown	PE	2	30	66	586	6.66667	11.2628	0.865259	1	0.591919
HEART	M5	green	O-PC	1	29	40	590	3.44828	6.77966	0.869381	1	0.508621
HIPPOC	M9	magenta	HexCer	1	17	67	586	5.88235	11.4334	0.872965	1	0.514486
LIVER	M2	blue	PC	8	44	155	630	18.1818	24.6032	0.87591	1	0.739003
LIVER	M6	red	SM	1	35	37	630	2.85714	5.87302	0.879446	1	0.486486
PLASMA	M3	brown	SM	1	28	44	585	3.57143	7.52137	0.88755	1	0.474838
LUNG	M6	red	PE	1	25	61	724	4	8.42541	0.888876	1	0.474754
PLASMA	M5	green	SM	1	29	44	585	3.44828	7.52137	0.895791	1	0.458464
WAT-SC	M2	blue	Cer	1	52	23	528	1.92308	4.35606	0.900002	1	0.441472
WAT-SC	M2	blue	PE	2	52	39	528	3.84615	7.38636	0.901434	1	0.52071
WAT-SC	M3	brown	Cer	1	54	23	528	1.85185	4.35606	0.908086	1	0.425121
WAT-SC	M2	blue	O-PE	2	52	40	528	3.84615	7.57576	0.909023	1	0.507692
HIPPOC	M2	blue	O-PC	2	48	48	586	4.16667	8.19113	0.909709	1	0.508681
WAT-SC	M3	brown	PE	2	54	39	528	3.7037	7.38636	0.912178	1	0.501425
PLASMA	M6	red	PC	3	19	156	585	15.7895	26.6667	0.914189	1	0.592105
PLASMA	M1	turquoise	PI	2	163	16	585	1.22699	2.73504	0.930282	1	0.44862
HIPPOC	M5	green	O-PE	2	32	78	586	6.25	13.3106	0.936715	1	0.469551
WAT-SC	M4	yellow	PE	1	38	39	528	2.63158	7.38636	0.944098	1	0.356275
WAT-SC	M4	yellow	O-PE	1	38	40	528	2.63158	7.57576	0.948136	1	0.347368
HIPPOC	M4	yellow	SM	1	45	38	586	2.22222	6.48464	0.949189	1	0.34269
WAT-SC	M3	brown	O-PC	1	54	29	528	1.85185	5.49242	0.950238	1	0.337165
BAT	M1	turquoise	SM	2	85	36	633	2.35294	5.6872	0.953356	1	0.413725
WAT-SC	M4	yellow	PC	3	38	85	528	7.89474	16.0985	0.953708	1	0.490402
WAT-SC	M1	turquoise	PC	7	73	85	528	9.58904	16.0985	0.954099	1	0.595649
HIPPOC	M2	blue	SM	1	48	38	586	2.08333	6.48464	0.958014	1	0.321272
LUNG	M2	blue	O-PC	1	38	59	724	2.63158	8.14917	0.959163	1	0.322926
HIPPOC	M1	turquoise	O-PE	2	36	78	586	5.55556	13.3106	0.959764	1	0.417379
HIPPOC	M9	magenta	PC	2	17	155	586	11.7647	26.4505	0.960571	1	0.444782
LUNG	M2	blue	PE	1	38	61	724	2.63158	8.42541	0.963467	1	0.312338
LIVER	M4	yellow	PC	6	43	155	630	13.9535	24.6032	0.967853	1	0.567142
HIPPOC	M3	brown	PC	4	30	155	586	13.3333	26.4505	0.972603	1	0.504086
LUNG	M1	turquoise	LPC	1	140	20	724	0.714286	2.76243	0.976722	1	0.258571
KIDNEY	M3	brown	PE	2	62	64	712	3.22581	8.98876	0.977084	1	0.358871
PLASMA	M1	turquoise	Cer	2	163	22	585	1.22699	3.76068	0.980352	1	0.326269
WAT-SC	M1	turquoise	O-PC	1	73	29	528	1.36986	5.49242	0.981476	1	0.24941
HEART	M1	turquoise	PE	3	67	66	590	4.47761	11.1864	0.981529	1	0.400271
PLASMA	M2	blue	Car	3	124	38	585	2.41935	6.49573	0.9847	1	0.372453
BAT	M3	brown	PE	1	32	79	633	3.125	12.4803	0.985112	1	0.250396
BAT	M1	turquoise	O-PC	1	85	34	633	1.17647	5.37125	0.989167	1	0.219031
HEART	M3	brown	PE	1	40	66	590	2.5	11.1864	0.990456	1	0.223485
PLASMA	M1	turquoise	Car	4	163	38	585	2.45399	6.49573	0.99079	1	0.377785
HEART	M5	green	TAG	2	29	130	590	6.89655	22.0339	0.992593	1	0.312997
SKM-GN	M3	brown	PC	4	38	128	490	10.5263	26.1224	0.99424	1	0.402961
HIPPOC	M4	yellow	PC	5	45	155	586	11.1111	26.4505	0.995978	1	0.420072
HIPPOC	M2	blue	PE	1	48	66	586	2.08333	11.2628	0.996239	1	0.184975
BAT	M1	turquoise	O-PE	1	85	43	633	1.17647	6.79305	0.996749	1	0.173187
PLASMA	M5	green	PC	2	29	156	585	6.89655	26.6667	0.998347	1	0.258621
PLASMA	M2	blue	LPC	2	124	49	585	1.6129	8.37607	0.999527	1	0.192561
PLASMA	M1	turquoise	LPC	3	163	49	585	1.84049	8.37607	0.999767	1	0.219732
PLASMA	M1	turquoise	SM	2	163	44	585	1.22699	7.52137	0.999878	1	0.163134
LIVER	M6	red	TAG	1	35	150	630	2.85714	23.8095	0.999908	1	0.12
BAT	M1	turquoise	PE	1	85	79	633	1.17647	12.4803	0.999978	1	0.0942666
BAT	M1	turquoise	PC	1	85	112	633	1.17647	17.6935	1	1	0.0664916
LIVER	M1	turquoise	PC	2	76	155	630	2.63158	24.6032	1	1	0.106961
BAT	M1	turquoise	Car	0	85	31	633	0	4.89731	1	1	0
BAT	M1	turquoise	Oxylipin	0	85	12	633	0	1.89573	1	1	0
BAT	M1	turquoise	PS	0	85	19	633	0	3.00158	1	1	0
BAT	M2	blue	Car	0	73	31	633	0	4.89731	1	1	0
BAT	M2	blue	DAG	0	73	19	633	0	3.00158	1	1	0
BAT	M2	blue	LPC	0	73	13	633	0	2.05371	1	1	0
BAT	M2	blue	Oxylipin	0	73	12	633	0	1.89573	1	1	0
BAT	M2	blue	TAG	0	73	214	633	0	33.8073	1	1	0
BAT	M3	brown	DAG	0	32	19	633	0	3.00158	1	1	0
BAT	M3	brown	LPC	0	32	13	633	0	2.05371	1	1	0
BAT	M3	brown	Oxylipin	0	32	12	633	0	1.89573	1	1	0
BAT	M3	brown	SM	0	32	36	633	0	5.6872	1	1	0
BAT	M3	brown	TAG	0	32	214	633	0	33.8073	1	1	0
BAT	M4	yellow	Car	0	19	31	633	0	4.89731	1	1	0
BAT	M4	yellow	Cer	0	19	21	633	0	3.31754	1	1	0
BAT	M4	yellow	DAG	0	19	19	633	0	3.00158	1	1	0
BAT	M4	yellow	LPC	0	19	13	633	0	2.05371	1	1	0
BAT	M4	yellow	O-PC	0	19	34	633	0	5.37125	1	1	0
BAT	M4	yellow	O-PE	0	19	43	633	0	6.79305	1	1	0
BAT	M4	yellow	Oxylipin	0	19	12	633	0	1.89573	1	1	0
BAT	M4	yellow	PS	0	19	19	633	0	3.00158	1	1	0
BAT	M4	yellow	SM	0	19	36	633	0	5.6872	1	1	0
BAT	M4	yellow	TAG	0	19	214	633	0	33.8073	1	1	0
BAT	M5	green	Car	0	31	31	633	0	4.89731	1	1	0
BAT	M5	green	Cer	0	31	21	633	0	3.31754	1	1	0
BAT	M5	green	LPC	0	31	13	633	0	2.05371	1	1	0
BAT	M5	green	O-PC	0	31	34	633	0	5.37125	1	1	0
BAT	M5	green	O-PE	0	31	43	633	0	6.79305	1	1	0
BAT	M5	green	Oxylipin	0	31	12	633	0	1.89573	1	1	0
BAT	M5	green	PS	0	31	19	633	0	3.00158	1	1	0
BAT	M5	green	SM	0	31	36	633	0	5.6872	1	1	0
BAT	M6	red	Cer	0	22	21	633	0	3.31754	1	1	0
BAT	M6	red	DAG	0	22	19	633	0	3.00158	1	1	0
BAT	M6	red	LPC	0	22	13	633	0	2.05371	1	1	0
BAT	M6	red	Oxylipin	0	22	12	633	0	1.89573	1	1	0
BAT	M6	red	PE	0	22	79	633	0	12.4803	1	1	0
BAT	M6	red	PS	0	22	19	633	0	3.00158	1	1	0
BAT	M6	red	TAG	0	22	214	633	0	33.8073	1	1	0
BAT	M7	black	Car	0	16	31	633	0	4.89731	1	1	0
BAT	M7	black	Cer	0	16	21	633	0	3.31754	1	1	0
BAT	M7	black	DAG	0	16	19	633	0	3.00158	1	1	0
BAT	M7	black	LPC	0	16	13	633	0	2.05371	1	1	0
BAT	M7	black	O-PC	0	16	34	633	0	5.37125	1	1	0
BAT	M7	black	O-PE	0	16	43	633	0	6.79305	1	1	0
BAT	M7	black	Oxylipin	0	16	12	633	0	1.89573	1	1	0
BAT	M7	black	PC	0	16	112	633	0	17.6935	1	1	0
BAT	M7	black	PS	0	16	19	633	0	3.00158	1	1	0
BAT	M7	black	SM	0	16	36	633	0	5.6872	1	1	0
BAT	M8	pink	Car	0	15	31	633	0	4.89731	1	1	0
BAT	M8	pink	LPC	0	15	13	633	0	2.05371	1	1	0
BAT	M8	pink	O-PC	0	15	34	633	0	5.37125	1	1	0
BAT	M8	pink	O-PE	0	15	43	633	0	6.79305	1	1	0
BAT	M8	pink	Oxylipin	0	15	12	633	0	1.89573	1	1	0
BAT	M8	pink	PC	0	15	112	633	0	17.6935	1	1	0
BAT	M8	pink	PE	0	15	79	633	0	12.4803	1	1	0
BAT	M8	pink	PS	0	15	19	633	0	3.00158	1	1	0
BAT	M8	pink	SM	0	15	36	633	0	5.6872	1	1	0
BAT	M9	magenta	Car	0	10	31	633	0	4.89731	1	1	0
BAT	M9	magenta	Cer	0	10	21	633	0	3.31754	1	1	0
BAT	M9	magenta	DAG	0	10	19	633	0	3.00158	1	1	0
BAT	M9	magenta	LPC	0	10	13	633	0	2.05371	1	1	0
BAT	M9	magenta	Oxylipin	0	10	12	633	0	1.89573	1	1	0
BAT	M9	magenta	PC	0	10	112	633	0	17.6935	1	1	0
BAT	M9	magenta	PE	0	10	79	633	0	12.4803	1	1	0
BAT	M9	magenta	PS	0	10	19	633	0	3.00158	1	1	0
BAT	M9	magenta	SM	0	10	36	633	0	5.6872	1	1	0
BAT	M9	magenta	TAG	0	10	214	633	0	33.8073	1	1	0
HEART	M1	turquoise	Car	0	67	41	590	0	6.94915	1	1	0
HEART	M1	turquoise	DAG	0	67	17	590	0	2.88136	1	1	0
HEART	M1	turquoise	Oxylipin	0	67	13	590	0	2.20339	1	1	0
HEART	M1	turquoise	PS	0	67	14	590	0	2.37288	1	1	0
HEART	M1	turquoise	TAG	0	67	130	590	0	22.0339	1	1	0
HEART	M2	blue	Car	0	37	41	590	0	6.94915	1	1	0
HEART	M2	blue	Cer	0	37	25	590	0	4.23729	1	1	0
HEART	M2	blue	DAG	0	37	17	590	0	2.88136	1	1	0
HEART	M2	blue	LPC	0	37	16	590	0	2.71186	1	1	0
HEART	M2	blue	O-PC	0	37	40	590	0	6.77966	1	1	0
HEART	M2	blue	Oxylipin	0	37	13	590	0	2.20339	1	1	0
HEART	M2	blue	PS	0	37	14	590	0	2.37288	1	1	0
HEART	M2	blue	SM	0	37	37	590	0	6.27119	1	1	0
HEART	M2	blue	TAG	0	37	130	590	0	22.0339	1	1	0
HEART	M3	brown	Car	0	40	41	590	0	6.94915	1	1	0
HEART	M3	brown	Cer	0	40	25	590	0	4.23729	1	1	0
HEART	M3	brown	LPC	0	40	16	590	0	2.71186	1	1	0
HEART	M3	brown	O-PC	0	40	40	590	0	6.77966	1	1	0
HEART	M3	brown	O-PE	0	40	47	590	0	7.9661	1	1	0
HEART	M3	brown	Oxylipin	0	40	13	590	0	2.20339	1	1	0
HEART	M3	brown	PC	0	40	144	590	0	24.4068	1	1	0
HEART	M3	brown	PS	0	40	14	590	0	2.37288	1	1	0
HEART	M3	brown	SM	0	40	37	590	0	6.27119	1	1	0
HEART	M4	yellow	Car	0	39	41	590	0	6.94915	1	1	0
HEART	M4	yellow	Cer	0	39	25	590	0	4.23729	1	1	0
HEART	M4	yellow	DAG	0	39	17	590	0	2.88136	1	1	0
HEART	M4	yellow	Oxylipin	0	39	13	590	0	2.20339	1	1	0
HEART	M4	yellow	SM	0	39	37	590	0	6.27119	1	1	0
HEART	M4	yellow	TAG	0	39	130	590	0	22.0339	1	1	0
HEART	M5	green	Car	0	29	41	590	0	6.94915	1	1	0
HEART	M5	green	DAG	0	29	17	590	0	2.88136	1	1	0
HEART	M5	green	Oxylipin	0	29	13	590	0	2.20339	1	1	0
HEART	M5	green	PS	0	29	14	590	0	2.37288	1	1	0
HEART	M6	red	Car	0	43	41	590	0	6.94915	1	1	0
HEART	M6	red	Cer	0	43	25	590	0	4.23729	1	1	0
HEART	M6	red	DAG	0	43	17	590	0	2.88136	1	1	0
HEART	M6	red	LPC	0	43	16	590	0	2.71186	1	1	0
HEART	M6	red	O-PC	0	43	40	590	0	6.77966	1	1	0
HEART	M6	red	O-PE	0	43	47	590	0	7.9661	1	1	0
HEART	M6	red	Oxylipin	0	43	13	590	0	2.20339	1	1	0
HEART	M6	red	PC	0	43	144	590	0	24.4068	1	1	0
HEART	M6	red	PE	0	43	66	590	0	11.1864	1	1	0
HEART	M6	red	PS	0	43	14	590	0	2.37288	1	1	0
HEART	M6	red	SM	0	43	37	590	0	6.27119	1	1	0
HEART	M7	black	Cer	0	30	25	590	0	4.23729	1	1	0
HEART	M7	black	DAG	0	30	17	590	0	2.88136	1	1	0
HEART	M7	black	LPC	0	30	16	590	0	2.71186	1	1	0
HEART	M7	black	O-PC	0	30	40	590	0	6.77966	1	1	0
HEART	M7	black	O-PE	0	30	47	590	0	7.9661	1	1	0
HEART	M7	black	Oxylipin	0	30	13	590	0	2.20339	1	1	0
HEART	M7	black	PC	0	30	144	590	0	24.4068	1	1	0
HEART	M7	black	PE	0	30	66	590	0	11.1864	1	1	0
HEART	M7	black	PS	0	30	14	590	0	2.37288	1	1	0
HEART	M7	black	SM	0	30	37	590	0	6.27119	1	1	0
HEART	M7	black	TAG	0	30	130	590	0	22.0339	1	1	0
HEART	M8	pink	Car	0	27	41	590	0	6.94915	1	1	0
HEART	M8	pink	Cer	0	27	25	590	0	4.23729	1	1	0
HEART	M8	pink	DAG	0	27	17	590	0	2.88136	1	1	0
HEART	M8	pink	LPC	0	27	16	590	0	2.71186	1	1	0
HEART	M8	pink	O-PC	0	27	40	590	0	6.77966	1	1	0
HEART	M8	pink	O-PE	0	27	47	590	0	7.9661	1	1	0
HEART	M8	pink	Oxylipin	0	27	13	590	0	2.20339	1	1	0
HEART	M8	pink	PC	0	27	144	590	0	24.4068	1	1	0
HEART	M8	pink	PE	0	27	66	590	0	11.1864	1	1	0
HEART	M8	pink	PS	0	27	14	590	0	2.37288	1	1	0
HEART	M9	magenta	Car	0	8	41	590	0	6.94915	1	1	0
HEART	M9	magenta	Cer	0	8	25	590	0	4.23729	1	1	0
HEART	M9	magenta	DAG	0	8	17	590	0	2.88136	1	1	0
HEART	M9	magenta	LPC	0	8	16	590	0	2.71186	1	1	0
HEART	M9	magenta	O-PC	0	8	40	590	0	6.77966	1	1	0
HEART	M9	magenta	Oxylipin	0	8	13	590	0	2.20339	1	1	0
HEART	M9	magenta	PS	0	8	14	590	0	2.37288	1	1	0
HEART	M9	magenta	TAG	0	8	130	590	0	22.0339	1	1	0
HIPPOC	M1	turquoise	Car	0	36	15	586	0	2.55973	1	1	0
HIPPOC	M1	turquoise	HexCer	0	36	67	586	0	11.4334	1	1	0
HIPPOC	M1	turquoise	LPC	0	36	23	586	0	3.92491	1	1	0
HIPPOC	M1	turquoise	O-PC	0	36	48	586	0	8.19113	1	1	0
HIPPOC	M1	turquoise	PS	0	36	26	586	0	4.43686	1	1	0
HIPPOC	M1	turquoise	SHexCer	0	36	16	586	0	2.73038	1	1	0
HIPPOC	M1	turquoise	SM	0	36	38	586	0	6.48464	1	1	0
HIPPOC	M2	blue	DAG	0	48	12	586	0	2.04778	1	1	0
HIPPOC	M2	blue	PS	0	48	26	586	0	4.43686	1	1	0
HIPPOC	M2	blue	SHexCer	0	48	16	586	0	2.73038	1	1	0
HIPPOC	M2	blue	TAG	0	48	19	586	0	3.24232	1	1	0
HIPPOC	M3	brown	Car	0	30	15	586	0	2.55973	1	1	0
HIPPOC	M3	brown	HexCer	0	30	67	586	0	11.4334	1	1	0
HIPPOC	M3	brown	LPC	0	30	23	586	0	3.92491	1	1	0
HIPPOC	M3	brown	SHexCer	0	30	16	586	0	2.73038	1	1	0
HIPPOC	M3	brown	TAG	0	30	19	586	0	3.24232	1	1	0
HIPPOC	M4	yellow	Car	0	45	15	586	0	2.55973	1	1	0
HIPPOC	M4	yellow	Cer	0	45	23	586	0	3.92491	1	1	0
HIPPOC	M4	yellow	DAG	0	45	12	586	0	2.04778	1	1	0
HIPPOC	M4	yellow	PS	0	45	26	586	0	4.43686	1	1	0
HIPPOC	M4	yellow	SHexCer	0	45	16	586	0	2.73038	1	1	0
HIPPOC	M4	yellow	TAG	0	45	19	586	0	3.24232	1	1	0
HIPPOC	M5	green	Car	0	32	15	586	0	2.55973	1	1	0
HIPPOC	M5	green	Cer	0	32	23	586	0	3.92491	1	1	0
HIPPOC	M5	green	HexCer	0	32	67	586	0	11.4334	1	1	0
HIPPOC	M5	green	LPC	0	32	23	586	0	3.92491	1	1	0
HIPPOC	M5	green	SHexCer	0	32	16	586	0	2.73038	1	1	0
HIPPOC	M5	green	SM	0	32	38	586	0	6.48464	1	1	0
HIPPOC	M5	green	TAG	0	32	19	586	0	3.24232	1	1	0
HIPPOC	M6	red	Car	0	29	15	586	0	2.55973	1	1	0
HIPPOC	M6	red	Cer	0	29	23	586	0	3.92491	1	1	0
HIPPOC	M6	red	DAG	0	29	12	586	0	2.04778	1	1	0
HIPPOC	M6	red	HexCer	0	29	67	586	0	11.4334	1	1	0
HIPPOC	M6	red	PS	0	29	26	586	0	4.43686	1	1	0
HIPPOC	M6	red	SHexCer	0	29	16	586	0	2.73038	1	1	0
HIPPOC	M6	red	TAG	0	29	19	586	0	3.24232	1	1	0
HIPPOC	M7	black	Car	0	18	15	586	0	2.55973	1	1	0
HIPPOC	M7	black	DAG	0	18	12	586	0	2.04778	1	1	0
HIPPOC	M7	black	LPC	0	18	23	586	0	3.92491	1	1	0
HIPPOC	M7	black	O-PC	0	18	48	586	0	8.19113	1	1	0
HIPPOC	M7	black	O-PE	0	18	78	586	0	13.3106	1	1	0
HIPPOC	M7	black	PC	0	18	155	586	0	26.4505	1	1	0
HIPPOC	M7	black	PE	0	18	66	586	0	11.2628	1	1	0
HIPPOC	M7	black	PS	0	18	26	586	0	4.43686	1	1	0
HIPPOC	M7	black	TAG	0	18	19	586	0	3.24232	1	1	0
HIPPOC	M8	pink	Car	0	14	15	586	0	2.55973	1	1	0
HIPPOC	M8	pink	Cer	0	14	23	586	0	3.92491	1	1	0
HIPPOC	M8	pink	DAG	0	14	12	586	0	2.04778	1	1	0
HIPPOC	M8	pink	HexCer	0	14	67	586	0	11.4334	1	1	0
HIPPOC	M8	pink	LPC	0	14	23	586	0	3.92491	1	1	0
HIPPOC	M8	pink	O-PC	0	14	48	586	0	8.19113	1	1	0
HIPPOC	M8	pink	O-PE	0	14	78	586	0	13.3106	1	1	0
HIPPOC	M8	pink	TAG	0	14	19	586	0	3.24232	1	1	0
HIPPOC	M9	magenta	Cer	0	17	23	586	0	3.92491	1	1	0
HIPPOC	M9	magenta	DAG	0	17	12	586	0	2.04778	1	1	0
HIPPOC	M9	magenta	LPC	0	17	23	586	0	3.92491	1	1	0
HIPPOC	M9	magenta	PE	0	17	66	586	0	11.2628	1	1	0
HIPPOC	M9	magenta	PS	0	17	26	586	0	4.43686	1	1	0
HIPPOC	M9	magenta	SHexCer	0	17	16	586	0	2.73038	1	1	0
HIPPOC	M9	magenta	SM	0	17	38	586	0	6.48464	1	1	0
HIPPOC	M9	magenta	TAG	0	17	19	586	0	3.24232	1	1	0
KIDNEY	M1	turquoise	Car	0	128	31	712	0	4.35393	1	1	0
KIDNEY	M1	turquoise	Cer	0	128	22	712	0	3.08989	1	1	0
KIDNEY	M1	turquoise	HexCer	0	128	14	712	0	1.96629	1	1	0
KIDNEY	M1	turquoise	LPC	0	128	20	712	0	2.80899	1	1	0
KIDNEY	M1	turquoise	O-PC	0	128	48	712	0	6.74157	1	1	0
KIDNEY	M1	turquoise	O-PE	0	128	53	712	0	7.44382	1	1	0
KIDNEY	M1	turquoise	Oxylipin	0	128	14	712	0	1.96629	1	1	0
KIDNEY	M1	turquoise	PC	0	128	162	712	0	22.7528	1	1	0
KIDNEY	M1	turquoise	PE	0	128	64	712	0	8.98876	1	1	0
KIDNEY	M1	turquoise	PG	0	128	10	712	0	1.40449	1	1	0
KIDNEY	M1	turquoise	PI	0	128	11	712	0	1.54494	1	1	0
KIDNEY	M1	turquoise	PS	0	128	25	712	0	3.51124	1	1	0
KIDNEY	M1	turquoise	SM	0	128	39	712	0	5.47753	1	1	0
KIDNEY	M2	blue	LPC	0	46	20	712	0	2.80899	1	1	0
KIDNEY	M2	blue	Oxylipin	0	46	14	712	0	1.96629	1	1	0
KIDNEY	M2	blue	PG	0	46	10	712	0	1.40449	1	1	0
KIDNEY	M2	blue	PI	0	46	11	712	0	1.54494	1	1	0
KIDNEY	M2	blue	TAG	0	46	183	712	0	25.7022	1	1	0
KIDNEY	M3	brown	DAG	0	62	16	712	0	2.24719	1	1	0
KIDNEY	M3	brown	HexCer	0	62	14	712	0	1.96629	1	1	0
KIDNEY	M3	brown	Oxylipin	0	62	14	712	0	1.96629	1	1	0
KIDNEY	M3	brown	PI	0	62	11	712	0	1.54494	1	1	0
KIDNEY	M3	brown	PS	0	62	25	712	0	3.51124	1	1	0
KIDNEY	M3	brown	TAG	0	62	183	712	0	25.7022	1	1	0
KIDNEY	M4	yellow	Car	0	31	31	712	0	4.35393	1	1	0
KIDNEY	M4	yellow	Cer	0	31	22	712	0	3.08989	1	1	0
KIDNEY	M4	yellow	DAG	0	31	16	712	0	2.24719	1	1	0
KIDNEY	M4	yellow	HexCer	0	31	14	712	0	1.96629	1	1	0
KIDNEY	M4	yellow	O-PC	0	31	48	712	0	6.74157	1	1	0
KIDNEY	M4	yellow	Oxylipin	0	31	14	712	0	1.96629	1	1	0
KIDNEY	M4	yellow	PG	0	31	10	712	0	1.40449	1	1	0
KIDNEY	M4	yellow	PI	0	31	11	712	0	1.54494	1	1	0
KIDNEY	M4	yellow	PS	0	31	25	712	0	3.51124	1	1	0
KIDNEY	M4	yellow	TAG	0	31	183	712	0	25.7022	1	1	0
KIDNEY	M5	green	Car	0	26	31	712	0	4.35393	1	1	0
KIDNEY	M5	green	DAG	0	26	16	712	0	2.24719	1	1	0
KIDNEY	M5	green	HexCer	0	26	14	712	0	1.96629	1	1	0
KIDNEY	M5	green	LPC	0	26	20	712	0	2.80899	1	1	0
KIDNEY	M5	green	Oxylipin	0	26	14	712	0	1.96629	1	1	0
KIDNEY	M5	green	PI	0	26	11	712	0	1.54494	1	1	0
KIDNEY	M5	green	PS	0	26	25	712	0	3.51124	1	1	0
KIDNEY	M5	green	TAG	0	26	183	712	0	25.7022	1	1	0
KIDNEY	M6	red	Car	0	20	31	712	0	4.35393	1	1	0
KIDNEY	M6	red	Cer	0	20	22	712	0	3.08989	1	1	0
KIDNEY	M6	red	DAG	0	20	16	712	0	2.24719	1	1	0
KIDNEY	M6	red	HexCer	0	20	14	712	0	1.96629	1	1	0
KIDNEY	M6	red	LPC	0	20	20	712	0	2.80899	1	1	0
KIDNEY	M6	red	Oxylipin	0	20	14	712	0	1.96629	1	1	0
KIDNEY	M6	red	PG	0	20	10	712	0	1.40449	1	1	0
KIDNEY	M6	red	PI	0	20	11	712	0	1.54494	1	1	0
KIDNEY	M6	red	PS	0	20	25	712	0	3.51124	1	1	0
KIDNEY	M6	red	TAG	0	20	183	712	0	25.7022	1	1	0
KIDNEY	M7	black	Car	0	16	31	712	0	4.35393	1	1	0
KIDNEY	M7	black	Cer	0	16	22	712	0	3.08989	1	1	0
KIDNEY	M7	black	DAG	0	16	16	712	0	2.24719	1	1	0
KIDNEY	M7	black	HexCer	0	16	14	712	0	1.96629	1	1	0
KIDNEY	M7	black	Oxylipin	0	16	14	712	0	1.96629	1	1	0
KIDNEY	M7	black	PG	0	16	10	712	0	1.40449	1	1	0
KIDNEY	M7	black	PI	0	16	11	712	0	1.54494	1	1	0
KIDNEY	M7	black	PS	0	16	25	712	0	3.51124	1	1	0
KIDNEY	M7	black	TAG	0	16	183	712	0	25.7022	1	1	0
KIDNEY	M8	pink	Car	0	11	31	712	0	4.35393	1	1	0
KIDNEY	M8	pink	Cer	0	11	22	712	0	3.08989	1	1	0
KIDNEY	M8	pink	DAG	0	11	16	712	0	2.24719	1	1	0
KIDNEY	M8	pink	HexCer	0	11	14	712	0	1.96629	1	1	0
KIDNEY	M8	pink	LPC	0	11	20	712	0	2.80899	1	1	0
KIDNEY	M8	pink	O-PC	0	11	48	712	0	6.74157	1	1	0
KIDNEY	M8	pink	O-PE	0	11	53	712	0	7.44382	1	1	0
KIDNEY	M8	pink	Oxylipin	0	11	14	712	0	1.96629	1	1	0
KIDNEY	M8	pink	PG	0	11	10	712	0	1.40449	1	1	0
KIDNEY	M8	pink	PI	0	11	11	712	0	1.54494	1	1	0
KIDNEY	M8	pink	PS	0	11	25	712	0	3.51124	1	1	0
KIDNEY	M8	pink	SM	0	11	39	712	0	5.47753	1	1	0
KIDNEY	M8	pink	TAG	0	11	183	712	0	25.7022	1	1	0
KIDNEY	M9	magenta	Car	0	8	31	712	0	4.35393	1	1	0
KIDNEY	M9	magenta	Cer	0	8	22	712	0	3.08989	1	1	0
KIDNEY	M9	magenta	DAG	0	8	16	712	0	2.24719	1	1	0
KIDNEY	M9	magenta	HexCer	0	8	14	712	0	1.96629	1	1	0
KIDNEY	M9	magenta	O-PC	0	8	48	712	0	6.74157	1	1	0
KIDNEY	M9	magenta	O-PE	0	8	53	712	0	7.44382	1	1	0
KIDNEY	M9	magenta	Oxylipin	0	8	14	712	0	1.96629	1	1	0
KIDNEY	M9	magenta	PE	0	8	64	712	0	8.98876	1	1	0
KIDNEY	M9	magenta	PG	0	8	10	712	0	1.40449	1	1	0
KIDNEY	M9	magenta	PI	0	8	11	712	0	1.54494	1	1	0
KIDNEY	M9	magenta	PS	0	8	25	712	0	3.51124	1	1	0
KIDNEY	M9	magenta	SM	0	8	39	712	0	5.47753	1	1	0
KIDNEY	M9	magenta	TAG	0	8	183	712	0	25.7022	1	1	0
LIVER	M1	turquoise	Car	0	76	36	630	0	5.71429	1	1	0
LIVER	M1	turquoise	Cer	0	76	31	630	0	4.92063	1	1	0
LIVER	M1	turquoise	LPC	0	76	18	630	0	2.85714	1	1	0
LIVER	M1	turquoise	O-PC	0	76	34	630	0	5.39683	1	1	0
LIVER	M1	turquoise	O-PE	0	76	36	630	0	5.71429	1	1	0
LIVER	M1	turquoise	PE	0	76	70	630	0	11.1111	1	1	0
LIVER	M1	turquoise	PI	0	76	13	630	0	2.06349	1	1	0
LIVER	M1	turquoise	PS	0	76	13	630	0	2.06349	1	1	0
LIVER	M1	turquoise	SM	0	76	37	630	0	5.87302	1	1	0
LIVER	M2	blue	PI	0	44	13	630	0	2.06349	1	1	0
LIVER	M2	blue	PS	0	44	13	630	0	2.06349	1	1	0
LIVER	M2	blue	TAG	0	44	150	630	0	23.8095	1	1	0
LIVER	M3	brown	Car	0	63	36	630	0	5.71429	1	1	0
LIVER	M3	brown	Cer	0	63	31	630	0	4.92063	1	1	0
LIVER	M3	brown	DAG	0	63	20	630	0	3.1746	1	1	0
LIVER	M3	brown	O-PC	0	63	34	630	0	5.39683	1	1	0
LIVER	M3	brown	O-PE	0	63	36	630	0	5.71429	1	1	0
LIVER	M3	brown	Oxylipin	0	63	17	630	0	2.69841	1	1	0
LIVER	M3	brown	SM	0	63	37	630	0	5.87302	1	1	0
LIVER	M3	brown	TAG	0	63	150	630	0	23.8095	1	1	0
LIVER	M4	yellow	DAG	0	43	20	630	0	3.1746	1	1	0
LIVER	M4	yellow	Oxylipin	0	43	17	630	0	2.69841	1	1	0
LIVER	M4	yellow	PI	0	43	13	630	0	2.06349	1	1	0
LIVER	M4	yellow	PS	0	43	13	630	0	2.06349	1	1	0
LIVER	M4	yellow	TAG	0	43	150	630	0	23.8095	1	1	0
LIVER	M5	green	Car	0	43	36	630	0	5.71429	1	1	0
LIVER	M5	green	Cer	0	43	31	630	0	4.92063	1	1	0
LIVER	M5	green	LPC	0	43	18	630	0	2.85714	1	1	0
LIVER	M5	green	O-PC	0	43	34	630	0	5.39683	1	1	0
LIVER	M5	green	O-PE	0	43	36	630	0	5.71429	1	1	0
LIVER	M5	green	Oxylipin	0	43	17	630	0	2.69841	1	1	0
LIVER	M5	green	PC	0	43	155	630	0	24.6032	1	1	0
LIVER	M5	green	PE	0	43	70	630	0	11.1111	1	1	0
LIVER	M5	green	PI	0	43	13	630	0	2.06349	1	1	0
LIVER	M5	green	PS	0	43	13	630	0	2.06349	1	1	0
LIVER	M5	green	SM	0	43	37	630	0	5.87302	1	1	0
LIVER	M6	red	Car	0	35	36	630	0	5.71429	1	1	0
LIVER	M6	red	Oxylipin	0	35	17	630	0	2.69841	1	1	0
LIVER	M6	red	PI	0	35	13	630	0	2.06349	1	1	0
LIVER	M7	black	Car	0	37	36	630	0	5.71429	1	1	0
LIVER	M7	black	DAG	0	37	20	630	0	3.1746	1	1	0
LIVER	M7	black	O-PC	0	37	34	630	0	5.39683	1	1	0
LIVER	M7	black	O-PE	0	37	36	630	0	5.71429	1	1	0
LIVER	M7	black	Oxylipin	0	37	17	630	0	2.69841	1	1	0
LIVER	M7	black	PI	0	37	13	630	0	2.06349	1	1	0
LIVER	M7	black	PS	0	37	13	630	0	2.06349	1	1	0
LIVER	M7	black	TAG	0	37	150	630	0	23.8095	1	1	0
LIVER	M8	pink	Car	0	30	36	630	0	5.71429	1	1	0
LIVER	M8	pink	Cer	0	30	31	630	0	4.92063	1	1	0
LIVER	M8	pink	DAG	0	30	20	630	0	3.1746	1	1	0
LIVER	M8	pink	LPC	0	30	18	630	0	2.85714	1	1	0
LIVER	M8	pink	O-PC	0	30	34	630	0	5.39683	1	1	0
LIVER	M8	pink	Oxylipin	0	30	17	630	0	2.69841	1	1	0
LIVER	M8	pink	PI	0	30	13	630	0	2.06349	1	1	0
LIVER	M8	pink	SM	0	30	37	630	0	5.87302	1	1	0
LIVER	M8	pink	TAG	0	30	150	630	0	23.8095	1	1	0
LIVER	M9	magenta	Cer	0	28	31	630	0	4.92063	1	1	0
LIVER	M9	magenta	DAG	0	28	20	630	0	3.1746	1	1	0
LIVER	M9	magenta	LPC	0	28	18	630	0	2.85714	1	1	0
LIVER	M9	magenta	O-PE	0	28	36	630	0	5.71429	1	1	0
LIVER	M9	magenta	Oxylipin	0	28	17	630	0	2.69841	1	1	0
LIVER	M9	magenta	PC	0	28	155	630	0	24.6032	1	1	0
LIVER	M9	magenta	PE	0	28	70	630	0	11.1111	1	1	0
LIVER	M9	magenta	PI	0	28	13	630	0	2.06349	1	1	0
LIVER	M9	magenta	PS	0	28	13	630	0	2.06349	1	1	0
LIVER	M9	magenta	SM	0	28	37	630	0	5.87302	1	1	0
LIVER	M9	magenta	TAG	0	28	150	630	0	23.8095	1	1	0
LUNG	M1	turquoise	Car	0	140	34	724	0	4.69613	1	1	0
LUNG	M1	turquoise	Cer	0	140	22	724	0	3.03867	1	1	0
LUNG	M1	turquoise	O-PC	0	140	59	724	0	8.14917	1	1	0
LUNG	M1	turquoise	O-PE	0	140	63	724	0	8.70166	1	1	0
LUNG	M1	turquoise	Oxylipin	0	140	24	724	0	3.31492	1	1	0
LUNG	M1	turquoise	PC	0	140	171	724	0	23.6188	1	1	0
LUNG	M1	turquoise	PE	0	140	61	724	0	8.42541	1	1	0
LUNG	M1	turquoise	PG	0	140	26	724	0	3.59116	1	1	0
LUNG	M1	turquoise	PI	0	140	13	724	0	1.79558	1	1	0
LUNG	M1	turquoise	PS	0	140	22	724	0	3.03867	1	1	0
LUNG	M1	turquoise	SM	0	140	42	724	0	5.8011	1	1	0
LUNG	M2	blue	Car	0	38	34	724	0	4.69613	1	1	0
LUNG	M2	blue	DAG	0	38	17	724	0	2.34807	1	1	0
LUNG	M2	blue	Oxylipin	0	38	24	724	0	3.31492	1	1	0
LUNG	M2	blue	PG	0	38	26	724	0	3.59116	1	1	0
LUNG	M2	blue	PI	0	38	13	724	0	1.79558	1	1	0
LUNG	M2	blue	PS	0	38	22	724	0	3.03867	1	1	0
LUNG	M2	blue	TAG	0	38	150	724	0	20.7182	1	1	0
LUNG	M3	brown	Car	0	33	34	724	0	4.69613	1	1	0
LUNG	M3	brown	DAG	0	33	17	724	0	2.34807	1	1	0
LUNG	M3	brown	Oxylipin	0	33	24	724	0	3.31492	1	1	0
LUNG	M3	brown	PG	0	33	26	724	0	3.59116	1	1	0
LUNG	M3	brown	PI	0	33	13	724	0	1.79558	1	1	0
LUNG	M3	brown	PS	0	33	22	724	0	3.03867	1	1	0
LUNG	M3	brown	TAG	0	33	150	724	0	20.7182	1	1	0
LUNG	M4	yellow	Car	0	23	34	724	0	4.69613	1	1	0
LUNG	M4	yellow	Cer	0	23	22	724	0	3.03867	1	1	0
LUNG	M4	yellow	DAG	0	23	17	724	0	2.34807	1	1	0
LUNG	M4	yellow	LPC	0	23	20	724	0	2.76243	1	1	0
LUNG	M4	yellow	Oxylipin	0	23	24	724	0	3.31492	1	1	0
LUNG	M4	yellow	PG	0	23	26	724	0	3.59116	1	1	0
LUNG	M4	yellow	PI	0	23	13	724	0	1.79558	1	1	0
LUNG	M4	yellow	PS	0	23	22	724	0	3.03867	1	1	0
LUNG	M4	yellow	SM	0	23	42	724	0	5.8011	1	1	0
LUNG	M4	yellow	TAG	0	23	150	724	0	20.7182	1	1	0
LUNG	M5	green	Cer	0	37	22	724	0	3.03867	1	1	0
LUNG	M5	green	DAG	0	37	17	724	0	2.34807	1	1	0
LUNG	M5	green	LPC	0	37	20	724	0	2.76243	1	1	0
LUNG	M5	green	Oxylipin	0	37	24	724	0	3.31492	1	1	0
LUNG	M5	green	PG	0	37	26	724	0	3.59116	1	1	0
LUNG	M5	green	PI	0	37	13	724	0	1.79558	1	1	0
LUNG	M5	green	PS	0	37	22	724	0	3.03867	1	1	0
LUNG	M5	green	TAG	0	37	150	724	0	20.7182	1	1	0
LUNG	M6	red	Car	0	25	34	724	0	4.69613	1	1	0
LUNG	M6	red	DAG	0	25	17	724	0	2.34807	1	1	0
LUNG	M6	red	Oxylipin	0	25	24	724	0	3.31492	1	1	0
LUNG	M6	red	PG	0	25	26	724	0	3.59116	1	1	0
LUNG	M6	red	PI	0	25	13	724	0	1.79558	1	1	0
LUNG	M6	red	PS	0	25	22	724	0	3.03867	1	1	0
LUNG	M6	red	SM	0	25	42	724	0	5.8011	1	1	0
LUNG	M6	red	TAG	0	25	150	724	0	20.7182	1	1	0
LUNG	M7	black	Cer	0	19	22	724	0	3.03867	1	1	0
LUNG	M7	black	DAG	0	19	17	724	0	2.34807	1	1	0
LUNG	M7	black	LPC	0	19	20	724	0	2.76243	1	1	0
LUNG	M7	black	O-PC	0	19	59	724	0	8.14917	1	1	0
LUNG	M7	black	O-PE	0	19	63	724	0	8.70166	1	1	0
LUNG	M7	black	Oxylipin	0	19	24	724	0	3.31492	1	1	0
LUNG	M7	black	PC	0	19	171	724	0	23.6188	1	1	0
LUNG	M7	black	PE	0	19	61	724	0	8.42541	1	1	0
LUNG	M7	black	PG	0	19	26	724	0	3.59116	1	1	0
LUNG	M7	black	PI	0	19	13	724	0	1.79558	1	1	0
LUNG	M7	black	PS	0	19	22	724	0	3.03867	1	1	0
LUNG	M7	black	SM	0	19	42	724	0	5.8011	1	1	0
LUNG	M7	black	TAG	0	19	150	724	0	20.7182	1	1	0
LUNG	M8	pink	Car	0	19	34	724	0	4.69613	1	1	0
LUNG	M8	pink	Cer	0	19	22	724	0	3.03867	1	1	0
LUNG	M8	pink	DAG	0	19	17	724	0	2.34807	1	1	0
LUNG	M8	pink	LPC	0	19	20	724	0	2.76243	1	1	0
LUNG	M8	pink	O-PC	0	19	59	724	0	8.14917	1	1	0
LUNG	M8	pink	O-PE	0	19	63	724	0	8.70166	1	1	0
LUNG	M8	pink	Oxylipin	0	19	24	724	0	3.31492	1	1	0
LUNG	M8	pink	PC	0	19	171	724	0	23.6188	1	1	0
LUNG	M8	pink	PE	0	19	61	724	0	8.42541	1	1	0
LUNG	M8	pink	PG	0	19	26	724	0	3.59116	1	1	0
LUNG	M8	pink	SM	0	19	42	724	0	5.8011	1	1	0
LUNG	M8	pink	TAG	0	19	150	724	0	20.7182	1	1	0
LUNG	M9	magenta	Car	0	6	34	724	0	4.69613	1	1	0
LUNG	M9	magenta	DAG	0	6	17	724	0	2.34807	1	1	0
LUNG	M9	magenta	LPC	0	6	20	724	0	2.76243	1	1	0
LUNG	M9	magenta	O-PC	0	6	59	724	0	8.14917	1	1	0
LUNG	M9	magenta	O-PE	0	6	63	724	0	8.70166	1	1	0
LUNG	M9	magenta	Oxylipin	0	6	24	724	0	3.31492	1	1	0
LUNG	M9	magenta	PE	0	6	61	724	0	8.42541	1	1	0
LUNG	M9	magenta	PI	0	6	13	724	0	1.79558	1	1	0
LUNG	M9	magenta	PS	0	6	22	724	0	3.03867	1	1	0
LUNG	M9	magenta	SM	0	6	42	724	0	5.8011	1	1	0
LUNG	M9	magenta	TAG	0	6	150	724	0	20.7182	1	1	0
PLASMA	M1	turquoise	O-PC	0	163	49	585	0	8.37607	1	1	0
PLASMA	M1	turquoise	O-PE	0	163	27	585	0	4.61538	1	1	0
PLASMA	M1	turquoise	Oxylipin	0	163	18	585	0	3.07692	1	1	0
PLASMA	M1	turquoise	PC	9	163	156	585	5.52147	26.6667	1	1	0.207055
PLASMA	M2	blue	DAG	0	124	14	585	0	2.39316	1	1	0
PLASMA	M2	blue	Oxylipin	0	124	18	585	0	3.07692	1	1	0
PLASMA	M2	blue	PE	0	124	21	585	0	3.58974	1	1	0
PLASMA	M2	blue	TAG	0	124	131	585	0	22.3932	1	1	0
PLASMA	M3	brown	Car	0	28	38	585	0	6.49573	1	1	0
PLASMA	M3	brown	DAG	0	28	14	585	0	2.39316	1	1	0
PLASMA	M3	brown	O-PC	0	28	49	585	0	8.37607	1	1	0
PLASMA	M3	brown	Oxylipin	0	28	18	585	0	3.07692	1	1	0
PLASMA	M3	brown	PE	0	28	21	585	0	3.58974	1	1	0
PLASMA	M3	brown	TAG	0	28	131	585	0	22.3932	1	1	0
PLASMA	M4	yellow	Car	0	32	38	585	0	6.49573	1	1	0
PLASMA	M4	yellow	Cer	0	32	22	585	0	3.76068	1	1	0
PLASMA	M4	yellow	DAG	0	32	14	585	0	2.39316	1	1	0
PLASMA	M4	yellow	O-PC	0	32	49	585	0	8.37607	1	1	0
PLASMA	M4	yellow	O-PE	0	32	27	585	0	4.61538	1	1	0
PLASMA	M4	yellow	Oxylipin	0	32	18	585	0	3.07692	1	1	0
PLASMA	M4	yellow	PE	0	32	21	585	0	3.58974	1	1	0
PLASMA	M4	yellow	SM	0	32	44	585	0	7.52137	1	1	0
PLASMA	M4	yellow	TAG	0	32	131	585	0	22.3932	1	1	0
PLASMA	M5	green	Cer	0	29	22	585	0	3.76068	1	1	0
PLASMA	M5	green	DAG	0	29	14	585	0	2.39316	1	1	0
PLASMA	M5	green	LPC	0	29	49	585	0	8.37607	1	1	0
PLASMA	M5	green	O-PE	0	29	27	585	0	4.61538	1	1	0
PLASMA	M5	green	Oxylipin	0	29	18	585	0	3.07692	1	1	0
PLASMA	M5	green	PE	0	29	21	585	0	3.58974	1	1	0
PLASMA	M5	green	PI	0	29	16	585	0	2.73504	1	1	0
PLASMA	M5	green	TAG	0	29	131	585	0	22.3932	1	1	0
PLASMA	M6	red	Car	0	19	38	585	0	6.49573	1	1	0
PLASMA	M6	red	Cer	0	19	22	585	0	3.76068	1	1	0
PLASMA	M6	red	DAG	0	19	14	585	0	2.39316	1	1	0
PLASMA	M6	red	LPC	0	19	49	585	0	8.37607	1	1	0
PLASMA	M6	red	Oxylipin	0	19	18	585	0	3.07692	1	1	0
PLASMA	M6	red	PE	0	19	21	585	0	3.58974	1	1	0
PLASMA	M6	red	PI	0	19	16	585	0	2.73504	1	1	0
PLASMA	M6	red	SM	0	19	44	585	0	7.52137	1	1	0
PLASMA	M6	red	TAG	0	19	131	585	0	22.3932	1	1	0
PLASMA	M7	black	Car	0	7	38	585	0	6.49573	1	1	0
PLASMA	M7	black	Cer	0	7	22	585	0	3.76068	1	1	0
PLASMA	M7	black	DAG	0	7	14	585	0	2.39316	1	1	0
PLASMA	M7	black	O-PC	0	7	49	585	0	8.37607	1	1	0
PLASMA	M7	black	O-PE	0	7	27	585	0	4.61538	1	1	0
PLASMA	M7	black	Oxylipin	0	7	18	585	0	3.07692	1	1	0
PLASMA	M7	black	PE	0	7	21	585	0	3.58974	1	1	0
PLASMA	M7	black	PI	0	7	16	585	0	2.73504	1	1	0
PLASMA	M7	black	SM	0	7	44	585	0	7.52137	1	1	0
PLASMA	M7	black	TAG	0	7	131	585	0	22.3932	1	1	0
PLASMA	M8	pink	Car	0	11	38	585	0	6.49573	1	1	0
PLASMA	M8	pink	Cer	0	11	22	585	0	3.76068	1	1	0
PLASMA	M8	pink	DAG	0	11	14	585	0	2.39316	1	1	0
PLASMA	M8	pink	LPC	0	11	49	585	0	8.37607	1	1	0
PLASMA	M8	pink	O-PC	0	11	49	585	0	8.37607	1	1	0
PLASMA	M8	pink	O-PE	0	11	27	585	0	4.61538	1	1	0
PLASMA	M8	pink	Oxylipin	0	11	18	585	0	3.07692	1	1	0
PLASMA	M8	pink	PE	0	11	21	585	0	3.58974	1	1	0
PLASMA	M8	pink	PI	0	11	16	585	0	2.73504	1	1	0
PLASMA	M8	pink	SM	0	11	44	585	0	7.52137	1	1	0
PLASMA	M8	pink	TAG	0	11	131	585	0	22.3932	1	1	0
PLASMA	M9	magenta	Car	0	9	38	585	0	6.49573	1	1	0
PLASMA	M9	magenta	Cer	0	9	22	585	0	3.76068	1	1	0
PLASMA	M9	magenta	DAG	0	9	14	585	0	2.39316	1	1	0
PLASMA	M9	magenta	LPC	0	9	49	585	0	8.37607	1	1	0
PLASMA	M9	magenta	O-PC	0	9	49	585	0	8.37607	1	1	0
PLASMA	M9	magenta	O-PE	0	9	27	585	0	4.61538	1	1	0
PLASMA	M9	magenta	Oxylipin	0	9	18	585	0	3.07692	1	1	0
PLASMA	M9	magenta	PE	0	9	21	585	0	3.58974	1	1	0
PLASMA	M9	magenta	SM	0	9	44	585	0	7.52137	1	1	0
PLASMA	M9	magenta	TAG	0	9	131	585	0	22.3932	1	1	0
SKM-GN	M1	turquoise	Car	0	116	10	490	0	2.04082	1	1	0
SKM-GN	M1	turquoise	Cer	0	116	14	490	0	2.85714	1	1	0
SKM-GN	M1	turquoise	HexCer	0	116	10	490	0	2.04082	1	1	0
SKM-GN	M1	turquoise	LPC	0	116	13	490	0	2.65306	1	1	0
SKM-GN	M1	turquoise	O-PC	0	116	33	490	0	6.73469	1	1	0
SKM-GN	M1	turquoise	O-PE	0	116	38	490	0	7.7551	1	1	0
SKM-GN	M1	turquoise	PC	0	116	128	490	0	26.1224	1	1	0
SKM-GN	M1	turquoise	PE	0	116	52	490	0	10.6122	1	1	0
SKM-GN	M1	turquoise	PS	0	116	16	490	0	3.26531	1	1	0
SKM-GN	M1	turquoise	SM	0	116	21	490	0	4.28571	1	1	0
SKM-GN	M2	blue	Car	0	26	10	490	0	2.04082	1	1	0
SKM-GN	M2	blue	DAG	0	26	14	490	0	2.85714	1	1	0
SKM-GN	M2	blue	HexCer	0	26	10	490	0	2.04082	1	1	0
SKM-GN	M2	blue	O-PC	0	26	33	490	0	6.73469	1	1	0
SKM-GN	M2	blue	PS	0	26	16	490	0	3.26531	1	1	0
SKM-GN	M2	blue	TAG	0	26	141	490	0	28.7755	1	1	0
SKM-GN	M3	brown	Car	0	38	10	490	0	2.04082	1	1	0
SKM-GN	M3	brown	Cer	0	38	14	490	0	2.85714	1	1	0
SKM-GN	M3	brown	DAG	0	38	14	490	0	2.85714	1	1	0
SKM-GN	M3	brown	LPC	0	38	13	490	0	2.65306	1	1	0
SKM-GN	M3	brown	TAG	0	38	141	490	0	28.7755	1	1	0
SKM-GN	M4	yellow	Car	0	29	10	490	0	2.04082	1	1	0
SKM-GN	M4	yellow	Cer	0	29	14	490	0	2.85714	1	1	0
SKM-GN	M4	yellow	DAG	0	29	14	490	0	2.85714	1	1	0
SKM-GN	M4	yellow	HexCer	0	29	10	490	0	2.04082	1	1	0
SKM-GN	M4	yellow	LPC	0	29	13	490	0	2.65306	1	1	0
SKM-GN	M4	yellow	O-PC	0	29	33	490	0	6.73469	1	1	0
SKM-GN	M4	yellow	O-PE	0	29	38	490	0	7.7551	1	1	0
SKM-GN	M4	yellow	PS	0	29	16	490	0	3.26531	1	1	0
SKM-GN	M4	yellow	SM	0	29	21	490	0	4.28571	1	1	0
SKM-GN	M4	yellow	TAG	0	29	141	490	0	28.7755	1	1	0
SKM-GN	M5	green	Car	0	27	10	490	0	2.04082	1	1	0
SKM-GN	M5	green	DAG	0	27	14	490	0	2.85714	1	1	0
SKM-GN	M5	green	HexCer	0	27	10	490	0	2.04082	1	1	0
SKM-GN	M5	green	LPC	0	27	13	490	0	2.65306	1	1	0
SKM-GN	M5	green	O-PE	0	27	38	490	0	7.7551	1	1	0
SKM-GN	M5	green	PS	0	27	16	490	0	3.26531	1	1	0
SKM-GN	M5	green	SM	0	27	21	490	0	4.28571	1	1	0
SKM-GN	M5	green	TAG	0	27	141	490	0	28.7755	1	1	0
SKM-GN	M6	red	Car	0	19	10	490	0	2.04082	1	1	0
SKM-GN	M6	red	DAG	0	19	14	490	0	2.85714	1	1	0
SKM-GN	M6	red	HexCer	0	19	10	490	0	2.04082	1	1	0
SKM-GN	M6	red	PS	0	19	16	490	0	3.26531	1	1	0
SKM-GN	M6	red	TAG	0	19	141	490	0	28.7755	1	1	0
SKM-GN	M7	black	Car	0	17	10	490	0	2.04082	1	1	0
SKM-GN	M7	black	Cer	0	17	14	490	0	2.85714	1	1	0
SKM-GN	M7	black	DAG	0	17	14	490	0	2.85714	1	1	0
SKM-GN	M7	black	HexCer	0	17	10	490	0	2.04082	1	1	0
SKM-GN	M7	black	LPC	0	17	13	490	0	2.65306	1	1	0
SKM-GN	M7	black	PE	0	17	52	490	0	10.6122	1	1	0
SKM-GN	M7	black	PS	0	17	16	490	0	3.26531	1	1	0
SKM-GN	M7	black	SM	0	17	21	490	0	4.28571	1	1	0
SKM-GN	M7	black	TAG	0	17	141	490	0	28.7755	1	1	0
SKM-GN	M8	pink	Car	0	12	10	490	0	2.04082	1	1	0
SKM-GN	M8	pink	DAG	0	12	14	490	0	2.85714	1	1	0
SKM-GN	M8	pink	HexCer	0	12	10	490	0	2.04082	1	1	0
SKM-GN	M8	pink	LPC	0	12	13	490	0	2.65306	1	1	0
SKM-GN	M8	pink	O-PC	0	12	33	490	0	6.73469	1	1	0
SKM-GN	M8	pink	PS	0	12	16	490	0	3.26531	1	1	0
SKM-GN	M8	pink	TAG	0	12	141	490	0	28.7755	1	1	0
SKM-GN	M9	magenta	Car	0	11	10	490	0	2.04082	1	1	0
SKM-GN	M9	magenta	Cer	0	11	14	490	0	2.85714	1	1	0
SKM-GN	M9	magenta	DAG	0	11	14	490	0	2.85714	1	1	0
SKM-GN	M9	magenta	HexCer	0	11	10	490	0	2.04082	1	1	0
SKM-GN	M9	magenta	LPC	0	11	13	490	0	2.65306	1	1	0
SKM-GN	M9	magenta	O-PE	0	11	38	490	0	7.7551	1	1	0
SKM-GN	M9	magenta	PE	0	11	52	490	0	10.6122	1	1	0
SKM-GN	M9	magenta	PS	0	11	16	490	0	3.26531	1	1	0
SKM-GN	M9	magenta	SM	0	11	21	490	0	4.28571	1	1	0
SKM-GN	M9	magenta	TAG	0	11	141	490	0	28.7755	1	1	0
WAT-SC	M1	turquoise	Car	0	73	13	528	0	2.46212	1	1	0
WAT-SC	M1	turquoise	Cer	0	73	23	528	0	4.35606	1	1	0
WAT-SC	M1	turquoise	HexCer	0	73	11	528	0	2.08333	1	1	0
WAT-SC	M1	turquoise	LPC	0	73	11	528	0	2.08333	1	1	0
WAT-SC	M1	turquoise	Oxylipin	0	73	20	528	0	3.78788	1	1	0
WAT-SC	M2	blue	Car	0	52	13	528	0	2.46212	1	1	0
WAT-SC	M2	blue	Oxylipin	0	52	20	528	0	3.78788	1	1	0
WAT-SC	M2	blue	PS	0	52	13	528	0	2.46212	1	1	0
WAT-SC	M2	blue	SM	0	52	35	528	0	6.62879	1	1	0
WAT-SC	M2	blue	TAG	0	52	187	528	0	35.4167	1	1	0
WAT-SC	M3	brown	Car	0	54	13	528	0	2.46212	1	1	0
WAT-SC	M3	brown	DAG	0	54	22	528	0	4.16667	1	1	0
WAT-SC	M3	brown	HexCer	0	54	11	528	0	2.08333	1	1	0
WAT-SC	M3	brown	Oxylipin	0	54	20	528	0	3.78788	1	1	0
WAT-SC	M3	brown	PC	0	54	85	528	0	16.0985	1	1	0
WAT-SC	M4	yellow	Car	0	38	13	528	0	2.46212	1	1	0
WAT-SC	M4	yellow	Cer	0	38	23	528	0	4.35606	1	1	0
WAT-SC	M4	yellow	DAG	0	38	22	528	0	4.16667	1	1	0
WAT-SC	M4	yellow	LPC	0	38	11	528	0	2.08333	1	1	0
WAT-SC	M4	yellow	O-PC	0	38	29	528	0	5.49242	1	1	0
WAT-SC	M4	yellow	Oxylipin	0	38	20	528	0	3.78788	1	1	0
WAT-SC	M4	yellow	PS	0	38	13	528	0	2.46212	1	1	0
WAT-SC	M5	green	LPC	0	34	11	528	0	2.08333	1	1	0
WAT-SC	M5	green	O-PE	0	34	40	528	0	7.57576	1	1	0
WAT-SC	M5	green	Oxylipin	0	34	20	528	0	3.78788	1	1	0
WAT-SC	M5	green	PS	0	34	13	528	0	2.46212	1	1	0
WAT-SC	M5	green	SM	0	34	35	528	0	6.62879	1	1	0
WAT-SC	M5	green	TAG	0	34	187	528	0	35.4167	1	1	0
WAT-SC	M6	red	Car	0	14	13	528	0	2.46212	1	1	0
WAT-SC	M6	red	DAG	0	14	22	528	0	4.16667	1	1	0
WAT-SC	M6	red	HexCer	0	14	11	528	0	2.08333	1	1	0
WAT-SC	M6	red	LPC	0	14	11	528	0	2.08333	1	1	0
WAT-SC	M6	red	O-PC	0	14	29	528	0	5.49242	1	1	0
WAT-SC	M6	red	O-PE	0	14	40	528	0	7.57576	1	1	0
WAT-SC	M6	red	Oxylipin	0	14	20	528	0	3.78788	1	1	0
WAT-SC	M6	red	PC	0	14	85	528	0	16.0985	1	1	0
WAT-SC	M7	black	DAG	0	15	22	528	0	4.16667	1	1	0
WAT-SC	M7	black	HexCer	0	15	11	528	0	2.08333	1	1	0
WAT-SC	M7	black	LPC	0	15	11	528	0	2.08333	1	1	0
WAT-SC	M7	black	O-PE	0	15	40	528	0	7.57576	1	1	0
WAT-SC	M7	black	Oxylipin	0	15	20	528	0	3.78788	1	1	0
WAT-SC	M7	black	PE	0	15	39	528	0	7.38636	1	1	0
WAT-SC	M7	black	PS	0	15	13	528	0	2.46212	1	1	0
WAT-SC	M7	black	SM	0	15	35	528	0	6.62879	1	1	0
WAT-SC	M7	black	TAG	0	15	187	528	0	35.4167	1	1	0
WAT-SC	M8	pink	Car	0	11	13	528	0	2.46212	1	1	0
WAT-SC	M8	pink	Cer	0	11	23	528	0	4.35606	1	1	0
WAT-SC	M8	pink	HexCer	0	11	11	528	0	2.08333	1	1	0
WAT-SC	M8	pink	LPC	0	11	11	528	0	2.08333	1	1	0
WAT-SC	M8	pink	Oxylipin	0	11	20	528	0	3.78788	1	1	0
WAT-SC	M8	pink	PE	0	11	39	528	0	7.38636	1	1	0
WAT-SC	M8	pink	PS	0	11	13	528	0	2.46212	1	1	0
WAT-SC	M8	pink	SM	0	11	35	528	0	6.62879	1	1	0
WAT-SC	M8	pink	TAG	0	11	187	528	0	35.4167	1	1	0
WAT-SC	M9	magenta	DAG	0	14	22	528	0	4.16667	1	1	0
WAT-SC	M9	magenta	HexCer	0	14	11	528	0	2.08333	1	1	0
WAT-SC	M9	magenta	LPC	0	14	11	528	0	2.08333	1	1	0
WAT-SC	M9	magenta	O-PC	0	14	29	528	0	5.49242	1	1	0
WAT-SC	M9	magenta	O-PE	0	14	40	528	0	7.57576	1	1	0
WAT-SC	M9	magenta	Oxylipin	0	14	20	528	0	3.78788	1	1	0
WAT-SC	M9	magenta	PS	0	14	13	528	0	2.46212	1	1	0
WAT-SC	M9	magenta	TAG	0	14	187	528	0	35.4167	1	1	0

## Sheet: S3 - WGCNA3
Correlations between WGCNA tissue module MEs and phenotypes
Tissue	moduleNumber	moduleColor	Sex	variable	Cor Coef	p-value
BAT	M1	turquoise	Female	Corticosterone	0.606078	0.00767244
BAT	M1	turquoise	Female	NEFA	-0.464669	0.052035
BAT	M1	turquoise	Female	Glycerol	-0.421387	0.0815753
BAT	M1	turquoise	Female	VO2max_change	0.606001	0.0836734
BAT	M1	turquoise	Female	HOMA_IR	-0.405614	0.094917
BAT	M1	turquoise	Female	Insulin	-0.367489	0.146742
BAT	M1	turquoise	Female	Area_ScWAT	-0.510478	0.160254
BAT	M1	turquoise	Female	IGR	-0.323546	0.205222
BAT	M1	turquoise	Female	bw_change	-0.415485	0.266083
BAT	M1	turquoise	Female	%lean_change	0.342692	0.366635
BAT	M1	turquoise	Female	Lactate	-0.219467	0.381568
BAT	M1	turquoise	Female	Leptin	-0.193938	0.440646
BAT	M1	turquoise	Female	%fat_change	-0.269757	0.482699
BAT	M1	turquoise	Female	Glucose	-0.16389	0.515804
BAT	M1	turquoise	Female	Max_Speed	0.0527015	0.892886
BAT	M1	turquoise	Female	Count_ScWAT	-0.0460554	0.906342
BAT	M1	turquoise	Female	Total_ketones	0.0296183	0.907127
BAT	M1	turquoise	Female	Glucagon	-0.00889999	0.972041
BAT	M2	blue	Female	%fat_change	-0.743293	0.0217222
BAT	M2	blue	Female	Glycerol	-0.52476	0.0253558
BAT	M2	blue	Female	NEFA	-0.429204	0.0754976
BAT	M2	blue	Female	Area_ScWAT	-0.576535	0.104156
BAT	M2	blue	Female	%lean_change	0.565785	0.112316
BAT	M2	blue	Female	Total_ketones	0.363812	0.137775
BAT	M2	blue	Female	Lactate	-0.360496	0.14167
BAT	M2	blue	Female	Leptin	-0.321913	0.192671
BAT	M2	blue	Female	bw_change	-0.429222	0.24896
BAT	M2	blue	Female	Glucagon	-0.270292	0.27802
BAT	M2	blue	Female	IGR	0.248545	0.336085
BAT	M2	blue	Female	VO2max_change	0.358977	0.342747
BAT	M2	blue	Female	Insulin	-0.238155	0.357318
BAT	M2	blue	Female	Glucose	-0.173778	0.49043
BAT	M2	blue	Female	HOMA_IR	0.0842611	0.739575
BAT	M2	blue	Female	Count_ScWAT	-0.0736364	0.850665
BAT	M2	blue	Female	Corticosterone	0.00724105	0.977251
BAT	M2	blue	Female	Max_Speed	0.00992821	0.979776
BAT	M3	brown	Female	IGR	-0.44735	0.0717822
BAT	M3	brown	Female	Glucagon	0.243399	0.330422
BAT	M3	brown	Female	VO2max_change	-0.33685	0.375393
BAT	M3	brown	Female	HOMA_IR	-0.214971	0.391638
BAT	M3	brown	Female	Insulin	-0.217485	0.401741
BAT	M3	brown	Female	Corticosterone	0.210048	0.402832
BAT	M3	brown	Female	Max_Speed	0.312666	0.412677
BAT	M3	brown	Female	Lactate	0.193985	0.440533
BAT	M3	brown	Female	NEFA	0.162893	0.518396
BAT	M3	brown	Female	Leptin	-0.153439	0.543273
BAT	M3	brown	Female	Area_ScWAT	0.199088	0.60758
BAT	M3	brown	Female	%fat_change	0.17234	0.657486
BAT	M3	brown	Female	Glucose	0.0717416	0.777264
BAT	M3	brown	Female	Glycerol	0.061222	0.809306
BAT	M3	brown	Female	%lean_change	-0.0558572	0.886504
BAT	M3	brown	Female	bw_change	0.0372009	0.924302
BAT	M3	brown	Female	Count_ScWAT	-0.0353963	0.927966
BAT	M3	brown	Female	Total_ketones	-0.00223024	0.992992
BAT	M4	yellow	Female	Corticosterone	-0.608263	0.00739791
BAT	M4	yellow	Female	Max_Speed	-0.678351	0.0445818
BAT	M4	yellow	Female	%lean_change	-0.650054	0.058045
BAT	M4	yellow	Female	Leptin	0.435235	0.0710415
BAT	M4	yellow	Female	Insulin	0.435668	0.0804571
BAT	M4	yellow	Female	IGR	0.421523	0.0919518
BAT	M4	yellow	Female	bw_change	0.558876	0.117758
BAT	M4	yellow	Female	Glycerol	0.364799	0.13663
BAT	M4	yellow	Female	Area_ScWAT	0.526234	0.145574
BAT	M4	yellow	Female	HOMA_IR	0.339733	0.167794
BAT	M4	yellow	Female	VO2max_change	-0.471353	0.200256
BAT	M4	yellow	Female	NEFA	0.282087	0.256753
BAT	M4	yellow	Female	%fat_change	0.402009	0.283465
BAT	M4	yellow	Female	Glucagon	-0.172649	0.493298
BAT	M4	yellow	Female	Glucose	0.102828	0.684726
BAT	M4	yellow	Female	Total_ketones	-0.079554	0.753684
BAT	M4	yellow	Female	Lactate	0.045762	0.856912
BAT	M4	yellow	Female	Count_ScWAT	0.0682031	0.861595
BAT	M5	green	Female	Leptin	0.679699	0.00191528
BAT	M5	green	Female	Glycerol	0.650048	0.00349569
BAT	M5	green	Female	Area_ScWAT	0.813104	0.00769959
BAT	M5	green	Female	Insulin	0.619954	0.00793825
BAT	M5	green	Female	NEFA	0.568409	0.013845
BAT	M5	green	Female	bw_change	0.739809	0.0226869
BAT	M5	green	Female	VO2max_change	-0.705723	0.0336462
BAT	M5	green	Female	%lean_change	-0.679501	0.0440818
BAT	M5	green	Female	%fat_change	0.658446	0.0538155
BAT	M5	green	Female	Corticosterone	-0.458435	0.0556969
BAT	M5	green	Female	Max_Speed	-0.527894	0.144075
BAT	M5	green	Female	IGR	0.30955	0.226637
BAT	M5	green	Female	Total_ketones	-0.258506	0.300318
BAT	M5	green	Female	Lactate	0.25627	0.304666
BAT	M5	green	Female	Glucose	0.189238	0.452011
BAT	M5	green	Female	HOMA_IR	0.149333	0.554243
BAT	M5	green	Female	Glucagon	-0.119299	0.637287
BAT	M5	green	Female	Count_ScWAT	-0.0141454	0.971188
BAT	M6	red	Female	Leptin	-0.662778	0.0027211
BAT	M6	red	Female	VO2max_change	0.783965	0.0124008
BAT	M6	red	Female	Glycerol	-0.490478	0.0387742
BAT	M6	red	Female	Glucagon	0.485558	0.041077
BAT	M6	red	Female	Max_Speed	0.648025	0.0590987
BAT	M6	red	Female	Glucose	-0.433747	0.0721227
BAT	M6	red	Female	NEFA	-0.428225	0.0762398
BAT	M6	red	Female	Total_ketones	0.396405	0.103399
BAT	M6	red	Female	Area_ScWAT	-0.574906	0.105368
BAT	M6	red	Female	Corticosterone	0.385432	0.114199
BAT	M6	red	Female	Insulin	-0.354919	0.162139
BAT	M6	red	Female	IGR	-0.318866	0.21223
BAT	M6	red	Female	%lean_change	0.344512	0.363928
BAT	M6	red	Female	HOMA_IR	0.156648	0.53477
BAT	M6	red	Female	bw_change	-0.196328	0.612669
BAT	M6	red	Female	Lactate	-0.107243	0.67189
BAT	M6	red	Female	%fat_change	-0.111868	0.774469
BAT	M6	red	Female	Count_ScWAT	-0.090052	0.817783
BAT	M7	black	Female	Leptin	0.596893	0.0089177
BAT	M7	black	Female	VO2max_change	-0.624635	0.0721177
BAT	M7	black	Female	Glucose	0.410408	0.0907056
BAT	M7	black	Female	Total_ketones	-0.402658	0.0975827
BAT	M7	black	Female	HOMA_IR	-0.373228	0.127125
BAT	M7	black	Female	Glycerol	0.363425	0.138226
BAT	M7	black	Female	Insulin	0.335177	0.188464
BAT	M7	black	Female	NEFA	0.26794	0.282386
BAT	M7	black	Female	Glucagon	-0.265815	0.286367
BAT	M7	black	Female	Area_ScWAT	0.374465	0.320759
BAT	M7	black	Female	Max_Speed	-0.336606	0.375761
BAT	M7	black	Female	Corticosterone	0.131627	0.602626
BAT	M7	black	Female	IGR	0.13108	0.616047
BAT	M7	black	Female	Count_ScWAT	0.114401	0.76947
BAT	M7	black	Female	%fat_change	-0.0661492	0.865732
BAT	M7	black	Female	Lactate	0.0291497	0.90859
BAT	M7	black	Female	%lean_change	0.032403	0.934047
BAT	M7	black	Female	bw_change	0.0280405	0.942914
BAT	M8	pink	Female	Corticosterone	-0.58616	0.0105736
BAT	M8	pink	Female	Lactate	0.508253	0.0312694
BAT	M8	pink	Female	%fat_change	0.679528	0.0440702
BAT	M8	pink	Female	NEFA	0.476325	0.0456784
BAT	M8	pink	Female	Glycerol	0.453324	0.0588411
BAT	M8	pink	Female	%lean_change	-0.643022	0.0617468
BAT	M8	pink	Female	bw_change	0.582944	0.0994666
BAT	M8	pink	Female	HOMA_IR	0.373919	0.126366
BAT	M8	pink	Female	Insulin	0.385583	0.126383
BAT	M8	pink	Female	Area_ScWAT	0.540223	0.133226
BAT	M8	pink	Female	Leptin	0.352851	0.150937
BAT	M8	pink	Female	IGR	0.234537	0.364885
BAT	M8	pink	Female	VO2max_change	-0.279177	0.466921
BAT	M8	pink	Female	Max_Speed	-0.257284	0.503923
BAT	M8	pink	Female	Glucagon	0.0656894	0.79566
BAT	M8	pink	Female	Total_ketones	-0.0647414	0.798551
BAT	M8	pink	Female	Count_ScWAT	-0.0869968	0.823886
BAT	M8	pink	Female	Glucose	-0.0191408	0.939909
BAT	M9	magenta	Female	VO2max_change	0.802461	0.00924333
BAT	M9	magenta	Female	Leptin	-0.535585	0.0219787
BAT	M9	magenta	Female	Glucagon	0.527866	0.0243479
BAT	M9	magenta	Female	Corticosterone	0.509926	0.0306255
BAT	M9	magenta	Female	IGR	-0.449316	0.0703925
BAT	M9	magenta	Female	Max_Speed	0.581692	0.100372
BAT	M9	magenta	Female	Glucose	-0.339591	0.167983
BAT	M9	magenta	Female	NEFA	-0.300395	0.225821
BAT	M9	magenta	Female	Glycerol	-0.283424	0.254409
BAT	M9	magenta	Female	Area_ScWAT	-0.394339	0.293613
BAT	M9	magenta	Female	Total_ketones	0.255193	0.306773
BAT	M9	magenta	Female	Insulin	-0.247187	0.338817
BAT	M9	magenta	Female	%lean_change	0.263768	0.492843
BAT	M9	magenta	Female	Lactate	-0.0835447	0.741717
BAT	M9	magenta	Female	Count_ScWAT	-0.116482	0.765372
BAT	M9	magenta	Female	%fat_change	0.0893486	0.819187
BAT	M9	magenta	Female	HOMA_IR	-0.0526252	0.83571
BAT	M9	magenta	Female	bw_change	-0.0453953	0.90768
BAT	NA	grey	Female	Leptin	0.713667	0.000881106
BAT	NA	grey	Female	VO2max_change	-0.717734	0.0294606
BAT	NA	grey	Female	Max_Speed	-0.6915	0.0390805
BAT	NA	grey	Female	Area_ScWAT	0.688985	0.0400969
BAT	NA	grey	Female	Glycerol	0.428364	0.0761345
BAT	NA	grey	Female	%lean_change	-0.602705	0.0858286
BAT	NA	grey	Female	%fat_change	0.556811	0.119415
BAT	NA	grey	Female	bw_change	0.555563	0.120422
BAT	NA	grey	Female	HOMA_IR	-0.275381	0.268715
BAT	NA	grey	Female	NEFA	0.261411	0.294726
BAT	NA	grey	Female	Total_ketones	-0.233495	0.351079
BAT	NA	grey	Female	Corticosterone	0.233212	0.351681
BAT	NA	grey	Female	IGR	-0.229276	0.37605
BAT	NA	grey	Female	Insulin	0.210881	0.416531
BAT	NA	grey	Female	Glucagon	0.159671	0.526817
BAT	NA	grey	Female	Lactate	0.140405	0.578424
BAT	NA	grey	Female	Glucose	0.00715581	0.977518
BAT	NA	grey	Female	Count_ScWAT	-0.00315391	0.993575
HEART	M1	turquoise	Female	Area_ScWAT	-0.679813	0.0105774
HEART	M1	turquoise	Female	bw_change	-0.679512	0.0106254
HEART	M1	turquoise	Female	VO2max_change	0.633539	0.0200832
HEART	M1	turquoise	Female	%lean_change	0.567071	0.0432773
HEART	M1	turquoise	Female	Max_Speed	0.536018	0.0589997
HEART	M1	turquoise	Female	%fat_change	-0.503398	0.0794802
HEART	M1	turquoise	Female	Total_ketones	-0.279379	0.196694
HEART	M1	turquoise	Female	Glucose	0.271059	0.210919
HEART	M1	turquoise	Female	Corticosterone	0.24712	0.255624
HEART	M1	turquoise	Female	Insulin	-0.225897	0.31209
HEART	M1	turquoise	Female	NEFA	-0.205643	0.346528
HEART	M1	turquoise	Female	Leptin	-0.195596	0.371098
HEART	M1	turquoise	Female	Glycerol	-0.182047	0.40577
HEART	M1	turquoise	Female	Lactate	0.158769	0.469326
HEART	M1	turquoise	Female	Count_ScWAT	0.1962	0.520599
HEART	M1	turquoise	Female	HOMA_IR	-0.138407	0.528825
HEART	M1	turquoise	Female	IGR	0.0374318	0.868645
HEART	M1	turquoise	Female	Glucagon	-0.0260037	0.906247
HEART	M2	blue	Female	Total_ketones	-0.714377	0.000128538
HEART	M2	blue	Female	Glucose	0.56838	0.0046594
HEART	M2	blue	Female	Lactate	0.51688	0.0115543
HEART	M2	blue	Female	Leptin	0.515418	0.0118327
HEART	M2	blue	Female	IGR	0.404721	0.0617123
HEART	M2	blue	Female	Corticosterone	-0.393323	0.0633446
HEART	M2	blue	Female	Glucagon	-0.325983	0.129016
HEART	M2	blue	Female	Insulin	0.258616	0.245189
HEART	M2	blue	Female	VO2max_change	0.33471	0.263633
HEART	M2	blue	Female	Glycerol	0.235041	0.280333
HEART	M2	blue	Female	NEFA	0.222754	0.306958
HEART	M2	blue	Female	Area_ScWAT	-0.213077	0.484589
HEART	M2	blue	Female	Max_Speed	0.17229	0.57354
HEART	M2	blue	Female	Count_ScWAT	-0.139968	0.648342
HEART	M2	blue	Female	HOMA_IR	0.0440341	0.841872
HEART	M2	blue	Female	%fat_change	-0.024841	0.935798
HEART	M2	blue	Female	%lean_change	0.0230781	0.940347
HEART	M2	blue	Female	bw_change	-0.00781498	0.979785
HEART	M3	brown	Female	Total_ketones	0.639021	0.00102949
HEART	M3	brown	Female	Glucose	-0.602906	0.00232633
HEART	M3	brown	Female	Glucagon	0.547658	0.00682971
HEART	M3	brown	Female	bw_change	0.654453	0.0152212
HEART	M3	brown	Female	IGR	-0.455078	0.0333297
HEART	M3	brown	Female	VO2max_change	-0.566836	0.0433834
HEART	M3	brown	Female	%fat_change	0.54831	0.0523587
HEART	M3	brown	Female	%lean_change	-0.481768	0.0955063
HEART	M3	brown	Female	Max_Speed	-0.465713	0.108741
HEART	M3	brown	Female	Lactate	-0.341289	0.110987
HEART	M3	brown	Female	Area_ScWAT	0.418197	0.155005
HEART	M3	brown	Female	Leptin	-0.273312	0.207001
HEART	M3	brown	Female	Count_ScWAT	-0.283712	0.347541
HEART	M3	brown	Female	Insulin	0.18355	0.413555
HEART	M3	brown	Female	Corticosterone	0.1609	0.463303
HEART	M3	brown	Female	Glycerol	0.150592	0.492798
HEART	M3	brown	Female	HOMA_IR	0.11536	0.600173
HEART	M3	brown	Female	NEFA	0.0698846	0.751356
HEART	M4	yellow	Female	Total_ketones	0.600054	0.00247101
HEART	M4	yellow	Female	Leptin	-0.471841	0.0230202
HEART	M4	yellow	Female	Glucose	-0.471177	0.0232406
HEART	M4	yellow	Female	Corticosterone	0.469517	0.0237982
HEART	M4	yellow	Female	Lactate	-0.412691	0.0503402
HEART	M4	yellow	Female	NEFA	-0.348507	0.103157
HEART	M4	yellow	Female	IGR	-0.35592	0.10401
HEART	M4	yellow	Female	Glycerol	-0.31453	0.14382
HEART	M4	yellow	Female	Glucagon	0.249483	0.250958
HEART	M4	yellow	Female	Insulin	-0.226187	0.311453
HEART	M4	yellow	Female	Area_ScWAT	-0.23452	0.440574
HEART	M4	yellow	Female	VO2max_change	-0.20841	0.494429
HEART	M4	yellow	Female	%lean_change	0.18269	0.550246
HEART	M4	yellow	Female	HOMA_IR	-0.130522	0.552778
HEART	M4	yellow	Female	Count_ScWAT	0.177918	0.560885
HEART	M4	yellow	Female	Max_Speed	-0.168184	0.582845
HEART	M4	yellow	Female	bw_change	-0.158253	0.605597
HEART	M4	yellow	Female	%fat_change	-0.029112	0.924786
HEART	M5	green	Female	HOMA_IR	-0.375753	0.0772345
HEART	M5	green	Female	Total_ketones	-0.346176	0.10564
HEART	M5	green	Female	Glucose	0.34118	0.11111
HEART	M5	green	Female	bw_change	-0.406987	0.167527
HEART	M5	green	Female	Glucagon	-0.295041	0.171716
HEART	M5	green	Female	%lean_change	0.384816	0.194161
HEART	M5	green	Female	VO2max_change	0.380035	0.200232
HEART	M5	green	Female	Max_Speed	0.354174	0.235108
HEART	M5	green	Female	Lactate	0.222164	0.308274
HEART	M5	green	Female	IGR	0.197596	0.378077
HEART	M5	green	Female	Area_ScWAT	-0.260998	0.389075
HEART	M5	green	Female	NEFA	0.147315	0.502365
HEART	M5	green	Female	Insulin	-0.119909	0.59506
HEART	M5	green	Female	Count_ScWAT	0.150146	0.624415
HEART	M5	green	Female	%fat_change	-0.129609	0.673016
HEART	M5	green	Female	Glycerol	0.0651206	0.767838
HEART	M5	green	Female	Leptin	0.0460541	0.834713
HEART	M5	green	Female	Corticosterone	0.0282982	0.898014
HEART	M6	red	Female	Glucose	-0.415788	0.0484687
HEART	M6	red	Female	Area_ScWAT	0.510318	0.0747745
HEART	M6	red	Female	bw_change	0.500978	0.0811728
HEART	M6	red	Female	Total_ketones	0.352418	0.0990884
HEART	M6	red	Female	%lean_change	-0.408913	0.165331
HEART	M6	red	Female	HOMA_IR	0.2854	0.186816
HEART	M6	red	Female	Lactate	-0.269304	0.214005
HEART	M6	red	Female	IGR	-0.214764	0.337158
HEART	M6	red	Female	VO2max_change	-0.278631	0.356614
HEART	M6	red	Female	Glucagon	0.148173	0.499851
HEART	M6	red	Female	%fat_change	0.185419	0.544202
HEART	M6	red	Female	Leptin	-0.125742	0.567536
HEART	M6	red	Female	Glycerol	-0.122676	0.577092
HEART	M6	red	Female	Max_Speed	-0.126098	0.68145
HEART	M6	red	Female	Count_ScWAT	-0.0976337	0.751007
HEART	M6	red	Female	NEFA	-0.0479385	0.828046
HEART	M6	red	Female	Insulin	0.042231	0.851973
HEART	M6	red	Female	Corticosterone	-0.0117747	0.957475
HEART	M7	black	Female	Glucose	0.470506	0.0234645
HEART	M7	black	Female	Glucagon	-0.433082	0.038993
HEART	M7	black	Female	IGR	0.441489	0.0396917
HEART	M7	black	Female	bw_change	-0.426415	0.146221
HEART	M7	black	Female	%lean_change	0.389453	0.188384
HEART	M7	black	Female	Corticosterone	-0.245653	0.258548
HEART	M7	black	Female	Leptin	0.244749	0.260359
HEART	M7	black	Female	Total_ketones	-0.205651	0.346509
HEART	M7	black	Female	%fat_change	-0.247698	0.414538
HEART	M7	black	Female	HOMA_IR	-0.127381	0.562455
HEART	M7	black	Female	Insulin	0.0953179	0.673064
HEART	M7	black	Female	VO2max_change	0.121329	0.692959
HEART	M7	black	Female	NEFA	0.0823145	0.708861
HEART	M7	black	Female	Count_ScWAT	0.103307	0.736985
HEART	M7	black	Female	Glycerol	0.0541675	0.806092
HEART	M7	black	Female	Max_Speed	0.054549	0.859515
HEART	M7	black	Female	Area_ScWAT	0.00958015	0.975221
HEART	M7	black	Female	Lactate	-8.11925e-05	0.999707
HEART	M8	pink	Female	Area_ScWAT	0.521078	0.0678495
HEART	M8	pink	Female	Glucose	-0.332718	0.120841
HEART	M8	pink	Female	HOMA_IR	0.323113	0.132619
HEART	M8	pink	Female	bw_change	0.431836	0.140609
HEART	M8	pink	Female	%lean_change	-0.404145	0.170802
HEART	M8	pink	Female	Total_ketones	0.232678	0.285337
HEART	M8	pink	Female	VO2max_change	-0.267314	0.377276
HEART	M8	pink	Female	Lactate	-0.155376	0.478996
HEART	M8	pink	Female	Corticosterone	-0.108569	0.62194
HEART	M8	pink	Female	Glycerol	-0.0944051	0.668315
HEART	M8	pink	Female	%fat_change	0.119466	0.697472
HEART	M8	pink	Female	Max_Speed	-0.111047	0.717978
HEART	M8	pink	Female	IGR	-0.0800926	0.723107
HEART	M8	pink	Female	Count_ScWAT	-0.0500431	0.871029
HEART	M8	pink	Female	Glucagon	0.0249938	0.909873
HEART	M8	pink	Female	NEFA	0.0166845	0.93977
HEART	M8	pink	Female	Insulin	0.00900479	0.968275
HEART	M8	pink	Female	Leptin	0.00368689	0.986679
HEART	M9	magenta	Female	Area_ScWAT	-0.637172	0.0191655
HEART	M9	magenta	Female	Lactate	0.440833	0.0352503
HEART	M9	magenta	Female	Total_ketones	-0.375169	0.077733
HEART	M9	magenta	Female	Glucose	0.356208	0.0952593
HEART	M9	magenta	Female	Count_ScWAT	-0.275444	0.36237
HEART	M9	magenta	Female	VO2max_change	0.212116	0.486607
HEART	M9	magenta	Female	NEFA	-0.145133	0.508784
HEART	M9	magenta	Female	Glucagon	0.110686	0.615119
HEART	M9	magenta	Female	Insulin	-0.106738	0.636371
HEART	M9	magenta	Female	IGR	-0.0812759	0.719175
HEART	M9	magenta	Female	HOMA_IR	-0.0766408	0.728162
HEART	M9	magenta	Female	Leptin	0.0616071	0.780056
HEART	M9	magenta	Female	%lean_change	-0.076719	0.803277
HEART	M9	magenta	Female	Corticosterone	-0.02669	0.903783
HEART	M9	magenta	Female	Glycerol	0.0226862	0.918165
HEART	M9	magenta	Female	%fat_change	0.0125447	0.967556
HEART	M9	magenta	Female	Max_Speed	-0.00575942	0.985102
HEART	M9	magenta	Female	bw_change	0.00130741	0.996618
HEART	NA	grey	Female	Lactate	-0.431303	0.0398942
HEART	NA	grey	Female	Glucagon	-0.401057	0.0578746
HEART	NA	grey	Female	IGR	0.403767	0.0623868
HEART	NA	grey	Female	%lean_change	0.498368	0.083027
HEART	NA	grey	Female	Max_Speed	0.388365	0.189729
HEART	NA	grey	Female	bw_change	-0.369408	0.214147
HEART	NA	grey	Female	Count_ScWAT	0.35403	0.235312
HEART	NA	grey	Female	VO2max_change	0.30433	0.312035
HEART	NA	grey	Female	NEFA	0.190253	0.384563
HEART	NA	grey	Female	Corticosterone	-0.157325	0.473428
HEART	NA	grey	Female	Area_ScWAT	0.216711	0.476989
HEART	NA	grey	Female	%fat_change	-0.205768	0.500039
HEART	NA	grey	Female	Insulin	0.128767	0.567932
HEART	NA	grey	Female	Total_ketones	0.101534	0.644815
HEART	NA	grey	Female	HOMA_IR	0.0529136	0.8105
HEART	NA	grey	Female	Glycerol	0.0413168	0.851521
HEART	NA	grey	Female	Glucose	-0.0184786	0.933307
HEART	NA	grey	Female	Leptin	0.0029113	0.989481
HIPPOC	M1	turquoise	Female	NEFA	-0.417749	0.0530439
HIPPOC	M1	turquoise	Female	Insulin	-0.415086	0.0613279
HIPPOC	M1	turquoise	Female	Lactate	-0.301981	0.171977
HIPPOC	M1	turquoise	Female	Glycerol	-0.301255	0.173061
HIPPOC	M1	turquoise	Female	Total_ketones	0.275889	0.213944
HIPPOC	M1	turquoise	Female	Max_Speed	-0.324713	0.27904
HIPPOC	M1	turquoise	Female	Area_ScWAT	-0.2794	0.355233
HIPPOC	M1	turquoise	Female	Glucose	-0.193166	0.389075
HIPPOC	M1	turquoise	Female	Count_ScWAT	-0.20923	0.492693
HIPPOC	M1	turquoise	Female	Corticosterone	0.153575	0.495018
HIPPOC	M1	turquoise	Female	Leptin	-0.144783	0.520318
HIPPOC	M1	turquoise	Female	%fat_change	0.14771	0.630112
HIPPOC	M1	turquoise	Female	%lean_change	-0.078961	0.797634
HIPPOC	M1	turquoise	Female	HOMA_IR	0.0356649	0.874797
HIPPOC	M1	turquoise	Female	IGR	0.0278804	0.904512
HIPPOC	M1	turquoise	Female	VO2max_change	0.0333736	0.91381
HIPPOC	M1	turquoise	Female	bw_change	0.0235608	0.939101
HIPPOC	M1	turquoise	Female	Glucagon	0.00373323	0.986845
HIPPOC	M2	blue	Female	NEFA	0.405585	0.0611062
HIPPOC	M2	blue	Female	bw_change	0.456575	0.116803
HIPPOC	M2	blue	Female	Insulin	0.340075	0.13146
HIPPOC	M2	blue	Female	VO2max_change	-0.394453	0.182278
HIPPOC	M2	blue	Female	Glycerol	0.285499	0.197764
HIPPOC	M2	blue	Female	Lactate	0.281435	0.204503
HIPPOC	M2	blue	Female	%lean_change	-0.37425	0.207735
HIPPOC	M2	blue	Female	Area_ScWAT	0.329443	0.271685
HIPPOC	M2	blue	Female	Leptin	0.225729	0.31246
HIPPOC	M2	blue	Female	%fat_change	0.289143	0.337984
HIPPOC	M2	blue	Female	HOMA_IR	-0.204277	0.361831
HIPPOC	M2	blue	Female	Corticosterone	-0.18419	0.411901
HIPPOC	M2	blue	Female	Glucagon	-0.137732	0.541043
HIPPOC	M2	blue	Female	Total_ketones	-0.119962	0.594896
HIPPOC	M2	blue	Female	Glucose	-0.0430006	0.849305
HIPPOC	M2	blue	Female	Max_Speed	-0.0257624	0.933422
HIPPOC	M2	blue	Female	Count_ScWAT	0.0227741	0.941131
HIPPOC	M2	blue	Female	IGR	-0.00922135	0.968356
HIPPOC	M3	brown	Female	Area_ScWAT	-0.6243	0.0225643
HIPPOC	M3	brown	Female	NEFA	-0.280235	0.206522
HIPPOC	M3	brown	Female	Insulin	-0.259577	0.255828
HIPPOC	M3	brown	Female	Max_Speed	-0.334218	0.264378
HIPPOC	M3	brown	Female	Total_ketones	0.222589	0.319416
HIPPOC	M3	brown	Female	Lactate	-0.217636	0.330581
HIPPOC	M3	brown	Female	Glucagon	0.133495	0.553677
HIPPOC	M3	brown	Female	HOMA_IR	0.11949	0.596358
HIPPOC	M3	brown	Female	%fat_change	0.14323	0.640639
HIPPOC	M3	brown	Female	Count_ScWAT	-0.140678	0.64666
HIPPOC	M3	brown	Female	Glycerol	-0.0928159	0.681203
HIPPOC	M3	brown	Female	IGR	0.0876979	0.705428
HIPPOC	M3	brown	Female	Glucose	0.0773199	0.732347
HIPPOC	M3	brown	Female	Leptin	-0.0433241	0.848184
HIPPOC	M3	brown	Female	%lean_change	0.0381016	0.901649
HIPPOC	M3	brown	Female	VO2max_change	-0.0294172	0.923999
HIPPOC	M3	brown	Female	bw_change	-0.0183518	0.95255
HIPPOC	M3	brown	Female	Corticosterone	-0.00568803	0.979958
HIPPOC	M4	yellow	Female	Area_ScWAT	0.5085	0.0759912
HIPPOC	M4	yellow	Female	NEFA	0.329196	0.134654
HIPPOC	M4	yellow	Female	Insulin	0.332015	0.141451
HIPPOC	M4	yellow	Female	Lactate	0.173471	0.440091
HIPPOC	M4	yellow	Female	Max_Speed	0.214927	0.480712
HIPPOC	M4	yellow	Female	Glycerol	0.142151	0.52801
HIPPOC	M4	yellow	Female	bw_change	0.183862	0.547648
HIPPOC	M4	yellow	Female	VO2max_change	-0.170291	0.578063
HIPPOC	M4	yellow	Female	Total_ketones	-0.123272	0.584695
HIPPOC	M4	yellow	Female	HOMA_IR	-0.122404	0.587364
HIPPOC	M4	yellow	Female	Glucagon	-0.116103	0.606881
HIPPOC	M4	yellow	Female	%lean_change	-0.157382	0.607608
HIPPOC	M4	yellow	Female	Leptin	0.110368	0.624875
HIPPOC	M4	yellow	Female	Count_ScWAT	0.147282	0.631115
HIPPOC	M4	yellow	Female	IGR	-0.0903533	0.69691
HIPPOC	M4	yellow	Female	Glucose	-0.0791958	0.726092
HIPPOC	M4	yellow	Female	Corticosterone	0.0288035	0.89875
HIPPOC	M4	yellow	Female	%fat_change	-0.0059367	0.984643
HIPPOC	M5	green	Female	NEFA	-0.331513	0.131768
HIPPOC	M5	green	Female	VO2max_change	0.414579	0.158978
HIPPOC	M5	green	Female	%fat_change	-0.406418	0.168179
HIPPOC	M5	green	Female	Glycerol	-0.300645	0.173977
HIPPOC	M5	green	Female	bw_change	-0.380527	0.199602
HIPPOC	M5	green	Female	Area_ScWAT	0.379859	0.200458
HIPPOC	M5	green	Female	%lean_change	0.369914	0.213471
HIPPOC	M5	green	Female	Lactate	-0.257425	0.247446
HIPPOC	M5	green	Female	Leptin	-0.242989	0.275878
HIPPOC	M5	green	Female	Max_Speed	0.273801	0.365357
HIPPOC	M5	green	Female	HOMA_IR	0.195323	0.383699
HIPPOC	M5	green	Female	Corticosterone	0.180303	0.422008
HIPPOC	M5	green	Female	Insulin	-0.156886	0.497047
HIPPOC	M5	green	Female	Glucagon	0.0400058	0.859696
HIPPOC	M5	green	Female	IGR	-0.0345525	0.8818
HIPPOC	M5	green	Female	Total_ketones	-0.0279295	0.901808
HIPPOC	M5	green	Female	Count_ScWAT	-0.010814	0.97203
HIPPOC	M5	green	Female	Glucose	-0.000776164	0.997265
HIPPOC	M6	red	Female	Area_ScWAT	-0.508699	0.0758578
HIPPOC	M6	red	Female	Max_Speed	-0.48552	0.09258
HIPPOC	M6	red	Female	%fat_change	0.449173	0.123619
HIPPOC	M6	red	Female	Total_ketones	0.31771	0.149627
HIPPOC	M6	red	Female	%lean_change	-0.306598	0.30826
HIPPOC	M6	red	Female	bw_change	0.282958	0.348879
HIPPOC	M6	red	Female	Insulin	-0.208039	0.3655
HIPPOC	M6	red	Female	HOMA_IR	-0.200896	0.37
HIPPOC	M6	red	Female	VO2max_change	-0.261648	0.387853
HIPPOC	M6	red	Female	Glucose	-0.128694	0.568151
HIPPOC	M6	red	Female	Corticosterone	-0.126167	0.575836
HIPPOC	M6	red	Female	Leptin	0.118899	0.598189
HIPPOC	M6	red	Female	IGR	0.107608	0.64245
HIPPOC	M6	red	Female	Lactate	-0.104558	0.643315
HIPPOC	M6	red	Female	Glycerol	0.0981135	0.664012
HIPPOC	M6	red	Female	Count_ScWAT	-0.132643	0.665755
HIPPOC	M6	red	Female	Glucagon	-0.0788711	0.727173
HIPPOC	M6	red	Female	NEFA	-0.0246575	0.913267
HIPPOC	M7	black	Female	Corticosterone	-0.472809	0.0262695
HIPPOC	M7	black	Female	Insulin	0.464029	0.0340933
HIPPOC	M7	black	Female	Total_ketones	-0.380042	0.0810454
HIPPOC	M7	black	Female	Glucose	0.333281	0.129596
HIPPOC	M7	black	Female	Lactate	0.303312	0.170002
HIPPOC	M7	black	Female	Glycerol	0.288437	0.192987
HIPPOC	M7	black	Female	%lean_change	0.349572	0.241677
HIPPOC	M7	black	Female	NEFA	0.225348	0.313298
HIPPOC	M7	black	Female	bw_change	-0.268016	0.375977
HIPPOC	M7	black	Female	%fat_change	-0.233221	0.443183
HIPPOC	M7	black	Female	Leptin	0.169366	0.451151
HIPPOC	M7	black	Female	Count_ScWAT	-0.170576	0.577416
HIPPOC	M7	black	Female	IGR	0.121796	0.598939
HIPPOC	M7	black	Female	Glucagon	-0.103765	0.645849
HIPPOC	M7	black	Female	Max_Speed	0.114413	0.709757
HIPPOC	M7	black	Female	HOMA_IR	-0.0193126	0.93202
HIPPOC	M7	black	Female	VO2max_change	0.0198378	0.948712
HIPPOC	M7	black	Female	Area_ScWAT	-0.00157026	0.995938
HIPPOC	M8	pink	Female	bw_change	-0.564583	0.0444108
HIPPOC	M8	pink	Female	%lean_change	0.493058	0.0868882
HIPPOC	M8	pink	Female	VO2max_change	0.47936	0.0974174
HIPPOC	M8	pink	Female	Area_ScWAT	-0.406951	0.167568
HIPPOC	M8	pink	Female	Glucose	0.296197	0.180747
HIPPOC	M8	pink	Female	Max_Speed	0.38303	0.196415
HIPPOC	M8	pink	Female	%fat_change	-0.328973	0.272411
HIPPOC	M8	pink	Female	Glucagon	0.244213	0.273391
HIPPOC	M8	pink	Female	HOMA_IR	0.243929	0.273966
HIPPOC	M8	pink	Female	Count_ScWAT	0.213422	0.483864
HIPPOC	M8	pink	Female	Corticosterone	-0.132408	0.556941
HIPPOC	M8	pink	Female	Leptin	-0.127991	0.570285
HIPPOC	M8	pink	Female	Total_ketones	-0.102106	0.65116
HIPPOC	M8	pink	Female	Insulin	0.0632758	0.78525
HIPPOC	M8	pink	Female	Lactate	-0.0599792	0.790898
HIPPOC	M8	pink	Female	Glycerol	0.0583141	0.796584
HIPPOC	M8	pink	Female	IGR	-0.0451907	0.845778
HIPPOC	M8	pink	Female	NEFA	-0.00447288	0.984239
HIPPOC	M9	magenta	Female	Area_ScWAT	0.549082	0.0519601
HIPPOC	M9	magenta	Female	Max_Speed	0.35914	0.228144
HIPPOC	M9	magenta	Female	Corticosterone	0.256634	0.248954
HIPPOC	M9	magenta	Female	%fat_change	-0.320428	0.2858
HIPPOC	M9	magenta	Female	Total_ketones	-0.202265	0.366681
HIPPOC	M9	magenta	Female	Glucagon	-0.198372	0.376168
HIPPOC	M9	magenta	Female	VO2max_change	0.262694	0.385889
HIPPOC	M9	magenta	Female	Glycerol	-0.167725	0.455613
HIPPOC	M9	magenta	Female	%lean_change	0.192557	0.528523
HIPPOC	M9	magenta	Female	bw_change	-0.114088	0.710549
HIPPOC	M9	magenta	Female	HOMA_IR	-0.0460188	0.838858
HIPPOC	M9	magenta	Female	Insulin	0.0326035	0.888426
HIPPOC	M9	magenta	Female	Count_ScWAT	0.0414328	0.893093
HIPPOC	M9	magenta	Female	Lactate	-0.0296438	0.895812
HIPPOC	M9	magenta	Female	NEFA	0.00618454	0.978209
HIPPOC	M9	magenta	Female	Leptin	0.0021803	0.992317
HIPPOC	M9	magenta	Female	Glucose	0.00123864	0.995635
HIPPOC	M9	magenta	Female	IGR	0.000344798	0.998816
HIPPOC	NA	grey	Female	NEFA	-0.655785	0.000921078
HIPPOC	NA	grey	Female	Leptin	-0.498585	0.0181841
HIPPOC	NA	grey	Female	Glycerol	-0.495938	0.0189078
HIPPOC	NA	grey	Female	Glucagon	0.387826	0.0745148
HIPPOC	NA	grey	Female	Corticosterone	0.35117	0.109043
HIPPOC	NA	grey	Female	IGR	-0.314842	0.164501
HIPPOC	NA	grey	Female	VO2max_change	0.361584	0.224764
HIPPOC	NA	grey	Female	Total_ketones	0.259665	0.243213
HIPPOC	NA	grey	Female	Lactate	-0.225044	0.313969
HIPPOC	NA	grey	Female	Glucose	-0.201253	0.369134
HIPPOC	NA	grey	Female	%lean_change	0.271329	0.369875
HIPPOC	NA	grey	Female	Insulin	-0.202472	0.378752
HIPPOC	NA	grey	Female	Count_ScWAT	-0.251283	0.407593
HIPPOC	NA	grey	Female	%fat_change	-0.217222	0.475924
HIPPOC	NA	grey	Female	Area_ScWAT	-0.188295	0.537861
HIPPOC	NA	grey	Female	Max_Speed	0.080989	0.792537
HIPPOC	NA	grey	Female	HOMA_IR	0.0339406	0.880808
HIPPOC	NA	grey	Female	bw_change	0.0284995	0.926365
KIDNEY	M1	turquoise	Female	Glycerol	-0.429213	0.0322682
KIDNEY	M1	turquoise	Female	NEFA	-0.391075	0.0532295
KIDNEY	M1	turquoise	Female	Glucagon	0.320631	0.118131
KIDNEY	M1	turquoise	Female	VO2max_change	0.41335	0.125655
KIDNEY	M1	turquoise	Female	IGR	-0.318193	0.129696
KIDNEY	M1	turquoise	Female	Leptin	-0.299054	0.146448
KIDNEY	M1	turquoise	Female	Corticosterone	0.227947	0.273127
KIDNEY	M1	turquoise	Female	HOMA_IR	0.226337	0.276621
KIDNEY	M1	turquoise	Female	Max_Speed	0.232874	0.403579
KIDNEY	M1	turquoise	Female	Insulin	-0.172242	0.420932
KIDNEY	M1	turquoise	Female	Count_ScWAT	-0.220429	0.429856
KIDNEY	M1	turquoise	Female	Area_ScWAT	-0.184347	0.510726
KIDNEY	M1	turquoise	Female	Total_ketones	-0.0827143	0.694266
KIDNEY	M1	turquoise	Female	Lactate	-0.0784347	0.709394
KIDNEY	M1	turquoise	Female	%lean_change	0.0579217	0.837542
KIDNEY	M1	turquoise	Female	%fat_change	0.0548972	0.845929
KIDNEY	M1	turquoise	Female	Glucose	-0.00668303	0.974708
KIDNEY	M1	turquoise	Female	bw_change	-0.00441621	0.987538
KIDNEY	M2	blue	Female	Glycerol	0.610929	0.00117881
KIDNEY	M2	blue	Female	VO2max_change	-0.597528	0.0186571
KIDNEY	M2	blue	Female	%lean_change	-0.572563	0.0257013
KIDNEY	M2	blue	Female	Total_ketones	0.427967	0.0328278
KIDNEY	M2	blue	Female	NEFA	0.423726	0.034792
KIDNEY	M2	blue	Female	%fat_change	0.528954	0.0426196
KIDNEY	M2	blue	Female	Max_Speed	-0.50537	0.0546451
KIDNEY	M2	blue	Female	Glucose	-0.369325	0.0692267
KIDNEY	M2	blue	Female	bw_change	0.450815	0.0916968
KIDNEY	M2	blue	Female	Area_ScWAT	0.387933	0.153063
KIDNEY	M2	blue	Female	Leptin	0.244765	0.238314
KIDNEY	M2	blue	Female	Corticosterone	-0.168719	0.42012
KIDNEY	M2	blue	Female	HOMA_IR	-0.15186	0.46867
KIDNEY	M2	blue	Female	Count_ScWAT	0.196592	0.482526
KIDNEY	M2	blue	Female	Glucagon	0.131807	0.529976
KIDNEY	M2	blue	Female	Insulin	0.0966809	0.653137
KIDNEY	M2	blue	Female	IGR	-0.0909393	0.672584
KIDNEY	M2	blue	Female	Lactate	-0.0767727	0.715298
KIDNEY	M3	brown	Female	Glycerol	0.496751	0.0115361
KIDNEY	M3	brown	Female	NEFA	0.492572	0.0123668
KIDNEY	M3	brown	Female	Leptin	0.471906	0.0172347
KIDNEY	M3	brown	Female	VO2max_change	-0.519114	0.0473705
KIDNEY	M3	brown	Female	Corticosterone	-0.366747	0.0713432
KIDNEY	M3	brown	Female	Insulin	0.33892	0.105212
KIDNEY	M3	brown	Female	Lactate	0.326256	0.111459
KIDNEY	M3	brown	Female	IGR	0.299586	0.15496
KIDNEY	M3	brown	Female	Area_ScWAT	0.381073	0.161094
KIDNEY	M3	brown	Female	Max_Speed	-0.269877	0.330671
KIDNEY	M3	brown	Female	Glucagon	-0.201688	0.333646
KIDNEY	M3	brown	Female	%lean_change	-0.248027	0.372762
KIDNEY	M3	brown	Female	Total_ketones	-0.16414	0.433025
KIDNEY	M3	brown	Female	bw_change	0.187634	0.503085
KIDNEY	M3	brown	Female	Count_ScWAT	0.114522	0.684445
KIDNEY	M3	brown	Female	Glucose	0.0505755	0.810265
KIDNEY	M3	brown	Female	%fat_change	-0.0307496	0.913373
KIDNEY	M3	brown	Female	HOMA_IR	-0.0175238	0.933741
KIDNEY	M4	yellow	Female	Glucose	0.363115	0.0744092
KIDNEY	M4	yellow	Female	%fat_change	-0.469629	0.0773525
KIDNEY	M4	yellow	Female	Total_ketones	-0.348431	0.0878354
KIDNEY	M4	yellow	Female	Glucagon	-0.346659	0.0895716
KIDNEY	M4	yellow	Female	Leptin	0.345802	0.0904209
KIDNEY	M4	yellow	Female	IGR	0.32738	0.118382
KIDNEY	M4	yellow	Female	%lean_change	0.402456	0.136956
KIDNEY	M4	yellow	Female	bw_change	-0.33115	0.227948
KIDNEY	M4	yellow	Female	Insulin	0.22947	0.280751
KIDNEY	M4	yellow	Female	Lactate	0.224358	0.280954
KIDNEY	M4	yellow	Female	NEFA	0.110869	0.597781
KIDNEY	M4	yellow	Female	Max_Speed	0.148141	0.598266
KIDNEY	M4	yellow	Female	Glycerol	0.0938658	0.655389
KIDNEY	M4	yellow	Female	HOMA_IR	-0.0820807	0.696498
KIDNEY	M4	yellow	Female	VO2max_change	0.0962843	0.73284
KIDNEY	M4	yellow	Female	Area_ScWAT	0.0734328	0.794801
KIDNEY	M4	yellow	Female	Corticosterone	-0.0465261	0.825217
KIDNEY	M4	yellow	Female	Count_ScWAT	-0.00812664	0.977069
KIDNEY	M5	green	Female	VO2max_change	-0.504805	0.0549611
KIDNEY	M5	green	Female	Total_ketones	0.374982	0.0647506
KIDNEY	M5	green	Female	HOMA_IR	-0.292666	0.155689
KIDNEY	M5	green	Female	Max_Speed	-0.379617	0.162834
KIDNEY	M5	green	Female	Glucose	-0.238711	0.250491
KIDNEY	M5	green	Female	Lactate	-0.235769	0.256551
KIDNEY	M5	green	Female	Glucagon	-0.174913	0.403006
KIDNEY	M5	green	Female	Corticosterone	0.172169	0.410539
KIDNEY	M5	green	Female	Insulin	0.14193	0.508256
KIDNEY	M5	green	Female	%fat_change	-0.135308	0.630656
KIDNEY	M5	green	Female	bw_change	0.130129	0.643909
KIDNEY	M5	green	Female	%lean_change	-0.111129	0.693368
KIDNEY	M5	green	Female	Leptin	0.0777337	0.711882
KIDNEY	M5	green	Female	Area_ScWAT	0.0907312	0.747772
KIDNEY	M5	green	Female	IGR	0.0676895	0.753318
KIDNEY	M5	green	Female	Count_ScWAT	0.0625849	0.824642
KIDNEY	M5	green	Female	Glycerol	0.0246237	0.906993
KIDNEY	M5	green	Female	NEFA	0.0161225	0.939029
KIDNEY	M6	red	Female	Glucagon	-0.297394	0.14881
KIDNEY	M6	red	Female	HOMA_IR	-0.274809	0.183694
KIDNEY	M6	red	Female	VO2max_change	-0.302785	0.272662
KIDNEY	M6	red	Female	%fat_change	-0.280139	0.311879
KIDNEY	M6	red	Female	Total_ketones	0.210647	0.312154
KIDNEY	M6	red	Female	Lactate	-0.200342	0.336951
KIDNEY	M6	red	Female	IGR	0.195497	0.359937
KIDNEY	M6	red	Female	Insulin	0.179948	0.400123
KIDNEY	M6	red	Female	Max_Speed	-0.198513	0.478172
KIDNEY	M6	red	Female	Corticosterone	0.143354	0.494217
KIDNEY	M6	red	Female	Leptin	0.112564	0.592156
KIDNEY	M6	red	Female	%lean_change	0.117145	0.677573
KIDNEY	M6	red	Female	Area_ScWAT	0.0953536	0.735336
KIDNEY	M6	red	Female	Glucose	-0.0585299	0.781085
KIDNEY	M6	red	Female	Count_ScWAT	0.0726148	0.797043
KIDNEY	M6	red	Female	bw_change	-0.0529169	0.851429
KIDNEY	M6	red	Female	NEFA	0.0300106	0.886762
KIDNEY	M6	red	Female	Glycerol	0.027029	0.897952
KIDNEY	M7	black	Female	Total_ketones	0.326963	0.110639
KIDNEY	M7	black	Female	Lactate	-0.314188	0.126129
KIDNEY	M7	black	Female	HOMA_IR	-0.306427	0.136276
KIDNEY	M7	black	Female	Corticosterone	0.272354	0.187799
KIDNEY	M7	black	Female	VO2max_change	-0.34312	0.210551
KIDNEY	M7	black	Female	Glucagon	-0.226354	0.276583
KIDNEY	M7	black	Female	Max_Speed	-0.248668	0.371487
KIDNEY	M7	black	Female	Glucose	-0.179384	0.390896
KIDNEY	M7	black	Female	%fat_change	-0.193727	0.489057
KIDNEY	M7	black	Female	IGR	0.0991655	0.644788
KIDNEY	M7	black	Female	Insulin	0.0806641	0.707893
KIDNEY	M7	black	Female	NEFA	-0.0431252	0.837821
KIDNEY	M7	black	Female	Count_ScWAT	0.0513591	0.855759
KIDNEY	M7	black	Female	Area_ScWAT	0.0469303	0.868092
KIDNEY	M7	black	Female	Glycerol	-0.0314303	0.881441
KIDNEY	M7	black	Female	bw_change	0.0377768	0.89367
KIDNEY	M7	black	Female	%lean_change	0.0357761	0.899274
KIDNEY	M7	black	Female	Leptin	0.000522659	0.998022
KIDNEY	M8	pink	Female	Total_ketones	-0.426262	0.0336064
KIDNEY	M8	pink	Female	Glucose	0.410001	0.0417965
KIDNEY	M8	pink	Female	NEFA	0.404806	0.0447211
KIDNEY	M8	pink	Female	Lactate	0.40119	0.0468504
KIDNEY	M8	pink	Female	Glucagon	-0.386447	0.0563652
KIDNEY	M8	pink	Female	Leptin	0.359513	0.0775473
KIDNEY	M8	pink	Female	%fat_change	-0.468529	0.0781437
KIDNEY	M8	pink	Female	Glycerol	0.347037	0.0891995
KIDNEY	M8	pink	Female	Max_Speed	0.414698	0.124303
KIDNEY	M8	pink	Female	IGR	0.319831	0.127623
KIDNEY	M8	pink	Female	Corticosterone	-0.308296	0.13378
KIDNEY	M8	pink	Female	%lean_change	0.365914	0.179819
KIDNEY	M8	pink	Female	bw_change	-0.277522	0.316613
KIDNEY	M8	pink	Female	Area_ScWAT	0.199448	0.476059
KIDNEY	M8	pink	Female	Count_ScWAT	0.19248	0.491912
KIDNEY	M8	pink	Female	HOMA_IR	-0.140031	0.504381
KIDNEY	M8	pink	Female	Insulin	0.141736	0.508842
KIDNEY	M8	pink	Female	VO2max_change	0.0971787	0.730443
KIDNEY	M9	magenta	Female	Lactate	0.632247	0.00069697
KIDNEY	M9	magenta	Female	Total_ketones	-0.612035	0.00114815
KIDNEY	M9	magenta	Female	Leptin	0.552373	0.00419423
KIDNEY	M9	magenta	Female	Corticosterone	-0.541973	0.00513387
KIDNEY	M9	magenta	Female	Glucose	0.493446	0.0121893
KIDNEY	M9	magenta	Female	NEFA	0.483746	0.0142845
KIDNEY	M9	magenta	Female	Glycerol	0.461683	0.0201667
KIDNEY	M9	magenta	Female	IGR	0.278212	0.188053
KIDNEY	M9	magenta	Female	Glucagon	-0.247437	0.233065
KIDNEY	M9	magenta	Female	Area_ScWAT	0.252019	0.364864
KIDNEY	M9	magenta	Female	Insulin	0.17975	0.400652
KIDNEY	M9	magenta	Female	Max_Speed	0.160516	0.567682
KIDNEY	M9	magenta	Female	Count_ScWAT	-0.103956	0.712356
KIDNEY	M9	magenta	Female	HOMA_IR	0.0383442	0.855605
KIDNEY	M9	magenta	Female	bw_change	-0.0211478	0.940368
KIDNEY	M9	magenta	Female	%fat_change	-0.020082	0.943369
KIDNEY	M9	magenta	Female	VO2max_change	0.0195155	0.944964
KIDNEY	M9	magenta	Female	%lean_change	0.0130351	0.963225
KIDNEY	NA	grey	Female	NEFA	0.52605	0.00691279
KIDNEY	NA	grey	Female	Glycerol	0.522363	0.00739103
KIDNEY	NA	grey	Female	Lactate	0.43734	0.028801
KIDNEY	NA	grey	Female	%fat_change	0.469045	0.0777722
KIDNEY	NA	grey	Female	Corticosterone	-0.344513	0.0917081
KIDNEY	NA	grey	Female	bw_change	0.402184	0.137246
KIDNEY	NA	grey	Female	%lean_change	-0.365696	0.180098
KIDNEY	NA	grey	Female	Total_ketones	-0.268727	0.19398
KIDNEY	NA	grey	Female	Leptin	0.248516	0.230968
KIDNEY	NA	grey	Female	Area_ScWAT	0.325099	0.237075
KIDNEY	NA	grey	Female	Glucagon	0.129572	0.537034
KIDNEY	NA	grey	Female	Max_Speed	0.123141	0.661953
KIDNEY	NA	grey	Female	VO2max_change	0.0977899	0.728806
KIDNEY	NA	grey	Female	Glucose	0.0697204	0.740525
KIDNEY	NA	grey	Female	Count_ScWAT	-0.0847281	0.764008
KIDNEY	NA	grey	Female	HOMA_IR	0.0528312	0.801963
KIDNEY	NA	grey	Female	IGR	-0.0399409	0.852996
KIDNEY	NA	grey	Female	Insulin	-0.0297177	0.890363
LIVER	M1	turquoise	Female	Total_ketones	0.606637	0.0016733
LIVER	M1	turquoise	Female	IGR	-0.612744	0.0018811
LIVER	M1	turquoise	Female	Glucose	-0.487652	0.0156391
LIVER	M1	turquoise	Female	Leptin	-0.468691	0.020879
LIVER	M1	turquoise	Female	Glucagon	0.376076	0.070112
LIVER	M1	turquoise	Female	Corticosterone	0.323397	0.123195
LIVER	M1	turquoise	Female	Insulin	-0.326946	0.127823
LIVER	M1	turquoise	Female	Lactate	-0.289251	0.170405
LIVER	M1	turquoise	Female	NEFA	-0.271015	0.20021
LIVER	M1	turquoise	Female	Max_Speed	-0.335536	0.221472
LIVER	M1	turquoise	Female	bw_change	0.311279	0.258756
LIVER	M1	turquoise	Female	VO2max_change	-0.31001	0.260806
LIVER	M1	turquoise	Female	HOMA_IR	-0.224716	0.291112
LIVER	M1	turquoise	Female	Glycerol	-0.21479	0.313499
LIVER	M1	turquoise	Female	%fat_change	0.26023	0.348909
LIVER	M1	turquoise	Female	Count_ScWAT	-0.247912	0.37299
LIVER	M1	turquoise	Female	%lean_change	-0.236434	0.396221
LIVER	M1	turquoise	Female	Area_ScWAT	0.012732	0.96408
LIVER	M2	blue	Female	Corticosterone	0.565944	0.00394395
LIVER	M2	blue	Female	NEFA	-0.540221	0.00642795
LIVER	M2	blue	Female	Lactate	-0.464639	0.022165
LIVER	M2	blue	Female	Total_ketones	0.456755	0.0248505
LIVER	M2	blue	Female	Glycerol	-0.45367	0.0259699
LIVER	M2	blue	Female	Glucose	-0.349621	0.0939972
LIVER	M2	blue	Female	Leptin	-0.344627	0.0991142
LIVER	M2	blue	Female	IGR	-0.326097	0.128875
LIVER	M2	blue	Female	Area_ScWAT	-0.393895	0.146305
LIVER	M2	blue	Female	Max_Speed	-0.352683	0.197277
LIVER	M2	blue	Female	Insulin	-0.255685	0.238981
LIVER	M2	blue	Female	VO2max_change	-0.250959	0.366951
LIVER	M2	blue	Female	HOMA_IR	-0.188742	0.377097
LIVER	M2	blue	Female	Glucagon	0.165121	0.440672
LIVER	M2	blue	Female	Count_ScWAT	-0.0468001	0.868455
LIVER	M2	blue	Female	bw_change	0.0340812	0.904025
LIVER	M2	blue	Female	%lean_change	0.0275418	0.922383
LIVER	M2	blue	Female	%fat_change	0.0045828	0.987068
LIVER	M3	brown	Female	Total_ketones	-0.732363	4.7269e-05
LIVER	M3	brown	Female	Glucose	0.545622	0.00581964
LIVER	M3	brown	Female	Leptin	0.526183	0.00826208
LIVER	M3	brown	Female	Lactate	0.448667	0.0278712
LIVER	M3	brown	Female	bw_change	-0.535835	0.039514
LIVER	M3	brown	Female	IGR	0.402275	0.0570477
LIVER	M3	brown	Female	Glucagon	-0.361509	0.0826104
LIVER	M3	brown	Female	VO2max_change	0.444252	0.0971143
LIVER	M3	brown	Female	Corticosterone	-0.342568	0.101283
LIVER	M3	brown	Female	Glycerol	0.325393	0.120765
LIVER	M3	brown	Female	%fat_change	-0.416717	0.122296
LIVER	M3	brown	Female	NEFA	0.315723	0.132866
LIVER	M3	brown	Female	Max_Speed	0.391717	0.14875
LIVER	M3	brown	Female	%lean_change	0.338162	0.217651
LIVER	M3	brown	Female	Insulin	0.260327	0.230264
LIVER	M3	brown	Female	Count_ScWAT	0.323692	0.239228
LIVER	M3	brown	Female	Area_ScWAT	0.0430162	0.879016
LIVER	M3	brown	Female	HOMA_IR	-0.0151269	0.944071
LIVER	M4	yellow	Female	HOMA_IR	0.34963	0.0939879
LIVER	M4	yellow	Female	Total_ketones	0.304494	0.147983
LIVER	M4	yellow	Female	Leptin	-0.229834	0.279968
LIVER	M4	yellow	Female	Glucose	-0.215218	0.312513
LIVER	M4	yellow	Female	VO2max_change	-0.256174	0.35674
LIVER	M4	yellow	Female	Glycerol	-0.183276	0.391318
LIVER	M4	yellow	Female	IGR	0.178183	0.415977
LIVER	M4	yellow	Female	Corticosterone	0.172872	0.419209
LIVER	M4	yellow	Female	Glucagon	0.16739	0.434331
LIVER	M4	yellow	Female	NEFA	-0.162863	0.447034
LIVER	M4	yellow	Female	Max_Speed	-0.210317	0.451831
LIVER	M4	yellow	Female	Lactate	-0.160795	0.452902
LIVER	M4	yellow	Female	Area_ScWAT	-0.131239	0.641061
LIVER	M4	yellow	Female	bw_change	-0.0932487	0.740992
LIVER	M4	yellow	Female	Count_ScWAT	0.0522095	0.853395
LIVER	M4	yellow	Female	%lean_change	-0.0399659	0.887543
LIVER	M4	yellow	Female	Insulin	0.0290127	0.895453
LIVER	M4	yellow	Female	%fat_change	-0.0109166	0.969199
LIVER	M5	green	Female	IGR	-0.394179	0.0627206
LIVER	M5	green	Female	Area_ScWAT	0.378875	0.163725
LIVER	M5	green	Female	bw_change	0.338987	0.216459
LIVER	M5	green	Female	Count_ScWAT	-0.326401	0.235092
LIVER	M5	green	Female	Lactate	0.248218	0.242196
LIVER	M5	green	Female	%fat_change	0.252286	0.364337
LIVER	M5	green	Female	%lean_change	-0.212515	0.447009
LIVER	M5	green	Female	HOMA_IR	-0.138028	0.520102
LIVER	M5	green	Female	NEFA	0.133353	0.534466
LIVER	M5	green	Female	Glucagon	0.123069	0.566705
LIVER	M5	green	Female	Corticosterone	-0.106716	0.619674
LIVER	M5	green	Female	Glucose	-0.101998	0.635321
LIVER	M5	green	Female	VO2max_change	0.0998079	0.72341
LIVER	M5	green	Female	Max_Speed	0.0920619	0.744186
LIVER	M5	green	Female	Insulin	-0.0495082	0.822501
LIVER	M5	green	Female	Glycerol	0.0436143	0.839639
LIVER	M5	green	Female	Total_ketones	-0.0370148	0.863663
LIVER	M5	green	Female	Leptin	-0.0330101	0.878301
LIVER	M6	red	Female	Corticosterone	-0.465839	0.0217776
LIVER	M6	red	Female	IGR	0.449105	0.0315753
LIVER	M6	red	Female	NEFA	0.434976	0.0336492
LIVER	M6	red	Female	Max_Speed	0.537975	0.0385834
LIVER	M6	red	Female	Glycerol	0.399615	0.0530293
LIVER	M6	red	Female	Total_ketones	-0.396477	0.0550981
LIVER	M6	red	Female	HOMA_IR	0.394188	0.0566465
LIVER	M6	red	Female	Glucose	0.389006	0.0602753
LIVER	M6	red	Female	Insulin	0.311649	0.147727
LIVER	M6	red	Female	VO2max_change	0.383845	0.157816
LIVER	M6	red	Female	Lactate	0.28975	0.169636
LIVER	M6	red	Female	Count_ScWAT	0.260197	0.348971
LIVER	M6	red	Female	%lean_change	0.182461	0.515135
LIVER	M6	red	Female	bw_change	-0.159817	0.569392
LIVER	M6	red	Female	Area_ScWAT	0.136264	0.62822
LIVER	M6	red	Female	Leptin	0.0973959	0.65073
LIVER	M6	red	Female	Glucagon	-0.0921303	0.668533
LIVER	M6	red	Female	%fat_change	-0.0661868	0.814707
LIVER	M7	black	Female	NEFA	-0.639236	0.00077154
LIVER	M7	black	Female	Glycerol	-0.604317	0.00176252
LIVER	M7	black	Female	Corticosterone	0.518761	0.00939547
LIVER	M7	black	Female	Leptin	-0.505992	0.0116458
LIVER	M7	black	Female	Lactate	-0.406027	0.0489902
LIVER	M7	black	Female	Total_ketones	0.363647	0.080677
LIVER	M7	black	Female	Glucagon	0.354663	0.0890323
LIVER	M7	black	Female	Glucose	-0.295118	0.161511
LIVER	M7	black	Female	Area_ScWAT	-0.377963	0.164826
LIVER	M7	black	Female	IGR	-0.22253	0.307457
LIVER	M7	black	Female	%fat_change	-0.267011	0.336032
LIVER	M7	black	Female	%lean_change	0.259321	0.350655
LIVER	M7	black	Female	Count_ScWAT	-0.220422	0.429871
LIVER	M7	black	Female	Insulin	-0.169291	0.439988
LIVER	M7	black	Female	HOMA_IR	0.14855	0.488465
LIVER	M7	black	Female	Max_Speed	-0.153413	0.585156
LIVER	M7	black	Female	bw_change	-0.0945755	0.737425
LIVER	M7	black	Female	VO2max_change	-0.0691012	0.806688
LIVER	M8	pink	Female	Total_ketones	-0.641571	0.000727474
LIVER	M8	pink	Female	Lactate	0.497341	0.0134093
LIVER	M8	pink	Female	Glucose	0.478406	0.0180407
LIVER	M8	pink	Female	Leptin	0.475643	0.0188138
LIVER	M8	pink	Female	Corticosterone	-0.46178	0.0231104
LIVER	M8	pink	Female	NEFA	0.455644	0.025249
LIVER	M8	pink	Female	Glycerol	0.444568	0.0295106
LIVER	M8	pink	Female	IGR	0.354198	0.0972753
LIVER	M8	pink	Female	Max_Speed	0.425251	0.114059
LIVER	M8	pink	Female	Insulin	0.33157	0.122207
LIVER	M8	pink	Female	VO2max_change	0.395316	0.144724
LIVER	M8	pink	Female	Glucagon	-0.280464	0.184355
LIVER	M8	pink	Female	Area_ScWAT	0.308633	0.263041
LIVER	M8	pink	Female	Count_ScWAT	0.187525	0.503337
LIVER	M8	pink	Female	bw_change	-0.141001	0.616206
LIVER	M8	pink	Female	%lean_change	0.105939	0.707092
LIVER	M8	pink	Female	%fat_change	-0.0469568	0.868019
LIVER	M8	pink	Female	HOMA_IR	0.00857982	0.968261
LIVER	M9	magenta	Female	Corticosterone	0.600562	0.00191554
LIVER	M9	magenta	Female	Total_ketones	0.561653	0.0042903
LIVER	M9	magenta	Female	Lactate	-0.452721	0.0263225
LIVER	M9	magenta	Female	Insulin	-0.421536	0.0451392
LIVER	M9	magenta	Female	Leptin	-0.371522	0.0738531
LIVER	M9	magenta	Female	NEFA	-0.361381	0.0827267
LIVER	M9	magenta	Female	Glucose	-0.343468	0.100331
LIVER	M9	magenta	Female	IGR	-0.34615	0.105668
LIVER	M9	magenta	Female	Area_ScWAT	-0.41454	0.124461
LIVER	M9	magenta	Female	VO2max_change	-0.404086	0.135223
LIVER	M9	magenta	Female	Glycerol	-0.295336	0.161187
LIVER	M9	magenta	Female	Max_Speed	-0.314349	0.253838
LIVER	M9	magenta	Female	Glucagon	0.228506	0.282833
LIVER	M9	magenta	Female	HOMA_IR	-0.205784	0.334698
LIVER	M9	magenta	Female	Count_ScWAT	0.201165	0.47219
LIVER	M9	magenta	Female	%lean_change	-0.0610862	0.828784
LIVER	M9	magenta	Female	%fat_change	0.0557487	0.843566
LIVER	M9	magenta	Female	bw_change	0.0292015	0.91772
LIVER	NA	grey	Female	Max_Speed	-0.495211	0.0605252
LIVER	NA	grey	Female	VO2max_change	-0.45132	0.0912883
LIVER	NA	grey	Female	Glucose	-0.340464	0.103537
LIVER	NA	grey	Female	Area_ScWAT	0.292885	0.289423
LIVER	NA	grey	Female	Count_ScWAT	-0.249012	0.370804
LIVER	NA	grey	Female	HOMA_IR	-0.190257	0.373207
LIVER	NA	grey	Female	IGR	-0.176638	0.420096
LIVER	NA	grey	Female	Glucagon	0.162296	0.44864
LIVER	NA	grey	Female	NEFA	-0.158932	0.458223
LIVER	NA	grey	Female	Corticosterone	0.130535	0.543214
LIVER	NA	grey	Female	Total_ketones	0.116629	0.587322
LIVER	NA	grey	Female	%lean_change	-0.147099	0.600872
LIVER	NA	grey	Female	Insulin	0.105471	0.631973
LIVER	NA	grey	Female	Leptin	0.0759754	0.724206
LIVER	NA	grey	Female	Lactate	-0.0388084	0.857122
LIVER	NA	grey	Female	%fat_change	0.0393353	0.889307
LIVER	NA	grey	Female	bw_change	-0.039317	0.889358
LIVER	NA	grey	Female	Glycerol	-0.0266239	0.90172
LUNG	M1	turquoise	Female	Leptin	0.468698	0.0181148
LUNG	M1	turquoise	Female	IGR	0.362078	0.0820926
LUNG	M1	turquoise	Female	Glucagon	-0.332696	0.104164
LUNG	M1	turquoise	Female	Max_Speed	-0.386055	0.155235
LUNG	M1	turquoise	Female	VO2max_change	-0.326964	0.234238
LUNG	M1	turquoise	Female	Count_ScWAT	-0.310145	0.260588
LUNG	M1	turquoise	Female	Insulin	0.203894	0.339254
LUNG	M1	turquoise	Female	Glucose	0.169061	0.419167
LUNG	M1	turquoise	Female	Corticosterone	-0.15362	0.463469
LUNG	M1	turquoise	Female	NEFA	0.11379	0.588103
LUNG	M1	turquoise	Female	Total_ketones	-0.113679	0.588469
LUNG	M1	turquoise	Female	Area_ScWAT	0.124435	0.658599
LUNG	M1	turquoise	Female	Glycerol	0.071936	0.73257
LUNG	M1	turquoise	Female	bw_change	-0.0393818	0.889177
LUNG	M1	turquoise	Female	HOMA_IR	-0.0270451	0.897891
LUNG	M1	turquoise	Female	%fat_change	0.0260306	0.926631
LUNG	M1	turquoise	Female	%lean_change	-0.0236432	0.933346
LUNG	M1	turquoise	Female	Lactate	-0.00371045	0.985956
LUNG	M2	blue	Female	Max_Speed	0.717649	0.00259214
LUNG	M2	blue	Female	VO2max_change	0.614045	0.0148842
LUNG	M2	blue	Female	Total_ketones	-0.434953	0.0297865
LUNG	M2	blue	Female	Count_ScWAT	0.434985	0.105141
LUNG	M2	blue	Female	Lactate	0.309141	0.132662
LUNG	M2	blue	Female	Glucose	0.29234	0.156171
LUNG	M2	blue	Female	%lean_change	0.338174	0.217634
LUNG	M2	blue	Female	%fat_change	-0.31858	0.247156
LUNG	M2	blue	Female	bw_change	-0.31097	0.259255
LUNG	M2	blue	Female	HOMA_IR	0.171548	0.412256
LUNG	M2	blue	Female	Corticosterone	-0.160445	0.443593
LUNG	M2	blue	Female	NEFA	0.129762	0.536434
LUNG	M2	blue	Female	IGR	0.113708	0.596779
LUNG	M2	blue	Female	Leptin	-0.104619	0.618708
LUNG	M2	blue	Female	Glycerol	0.104102	0.620451
LUNG	M2	blue	Female	Area_ScWAT	-0.0922826	0.743592
LUNG	M2	blue	Female	Insulin	0.0484845	0.821997
LUNG	M2	blue	Female	Glucagon	0.00610908	0.976879
LUNG	M3	brown	Female	Insulin	-0.418404	0.0418747
LUNG	M3	brown	Female	Count_ScWAT	0.424647	0.114629
LUNG	M3	brown	Female	Leptin	-0.239469	0.248944
LUNG	M3	brown	Female	IGR	-0.242127	0.254322
LUNG	M3	brown	Female	VO2max_change	0.263423	0.34281
LUNG	M3	brown	Female	Area_ScWAT	-0.257261	0.354632
LUNG	M3	brown	Female	Glucagon	0.192486	0.356624
LUNG	M3	brown	Female	Max_Speed	0.215821	0.439803
LUNG	M3	brown	Female	NEFA	-0.124298	0.553868
LUNG	M3	brown	Female	Total_ketones	0.0748735	0.722064
LUNG	M3	brown	Female	Glucose	-0.0685146	0.744865
LUNG	M3	brown	Female	HOMA_IR	0.0615812	0.769965
LUNG	M3	brown	Female	bw_change	-0.0699321	0.804404
LUNG	M3	brown	Female	Corticosterone	0.0350154	0.868028
LUNG	M3	brown	Female	Lactate	-0.0288682	0.891047
LUNG	M3	brown	Female	%fat_change	-0.020329	0.942673
LUNG	M3	brown	Female	%lean_change	-0.013108	0.96302
LUNG	M3	brown	Female	Glycerol	-0.00285326	0.9892
LUNG	M4	yellow	Female	Glucagon	0.409975	0.041811
LUNG	M4	yellow	Female	Glucose	-0.392048	0.0525881
LUNG	M4	yellow	Female	IGR	-0.339281	0.104819
LUNG	M4	yellow	Female	bw_change	0.396304	0.143632
LUNG	M4	yellow	Female	%lean_change	-0.37082	0.173609
LUNG	M4	yellow	Female	Total_ketones	0.267827	0.195536
LUNG	M4	yellow	Female	%fat_change	0.344139	0.209111
LUNG	M4	yellow	Female	Leptin	-0.256321	0.216168
LUNG	M4	yellow	Female	Count_ScWAT	0.212855	0.446264
LUNG	M4	yellow	Female	Insulin	0.150822	0.481763
LUNG	M4	yellow	Female	Corticosterone	0.0907261	0.666252
LUNG	M4	yellow	Female	Glycerol	0.0837202	0.690726
LUNG	M4	yellow	Female	VO2max_change	-0.0875589	0.75634
LUNG	M4	yellow	Female	HOMA_IR	-0.0598713	0.776191
LUNG	M4	yellow	Female	Max_Speed	0.0258707	0.927081
LUNG	M4	yellow	Female	Lactate	0.0100997	0.961784
LUNG	M4	yellow	Female	NEFA	0.00939762	0.964439
LUNG	M4	yellow	Female	Area_ScWAT	-0.00389361	0.989012
LUNG	M5	green	Female	Leptin	-0.415429	0.0389045
LUNG	M5	green	Female	Insulin	-0.399078	0.0533793
LUNG	M5	green	Female	VO2max_change	0.475375	0.0733119
LUNG	M5	green	Female	Count_ScWAT	0.437685	0.102757
LUNG	M5	green	Female	Max_Speed	0.433053	0.106871
LUNG	M5	green	Female	Area_ScWAT	-0.365421	0.18045
LUNG	M5	green	Female	bw_change	-0.351961	0.19826
LUNG	M5	green	Female	%fat_change	-0.331805	0.226974
LUNG	M5	green	Female	NEFA	-0.241617	0.244597
LUNG	M5	green	Female	%lean_change	0.289111	0.295971
LUNG	M5	green	Female	Glycerol	-0.204549	0.326689
LUNG	M5	green	Female	Lactate	-0.162035	0.439031
LUNG	M5	green	Female	Corticosterone	0.130891	0.532864
LUNG	M5	green	Female	IGR	-0.105746	0.622877
LUNG	M5	green	Female	HOMA_IR	0.101586	0.628967
LUNG	M5	green	Female	Glucagon	0.0862206	0.681955
LUNG	M5	green	Female	Total_ketones	0.048263	0.818796
LUNG	M5	green	Female	Glucose	0.00582563	0.977952
LUNG	M6	red	Female	Leptin	-0.661447	0.000317688
LUNG	M6	red	Female	Glycerol	-0.642891	0.000528297
LUNG	M6	red	Female	Max_Speed	0.687625	0.00461061
LUNG	M6	red	Female	%fat_change	-0.673447	0.00591972
LUNG	M6	red	Female	NEFA	-0.519029	0.00784693
LUNG	M6	red	Female	VO2max_change	0.598558	0.0184023
LUNG	M6	red	Female	%lean_change	0.576643	0.0244302
LUNG	M6	red	Female	bw_change	-0.457629	0.0863011
LUNG	M6	red	Female	Area_ScWAT	-0.38122	0.160919
LUNG	M6	red	Female	Corticosterone	0.26052	0.208476
LUNG	M6	red	Female	Lactate	-0.189264	0.364883
LUNG	M6	red	Female	HOMA_IR	0.138392	0.509433
LUNG	M6	red	Female	Glucagon	0.124699	0.55258
LUNG	M6	red	Female	Glucose	-0.0593665	0.778032
LUNG	M6	red	Female	Total_ketones	0.0569562	0.786837
LUNG	M6	red	Female	Insulin	0.0446077	0.836034
LUNG	M6	red	Female	IGR	-0.0229019	0.915408
LUNG	M6	red	Female	Count_ScWAT	0.0233695	0.934115
LUNG	M7	black	Female	Total_ketones	0.800472	1.55139e-06
LUNG	M7	black	Female	Glucose	-0.634853	0.000651866
LUNG	M7	black	Female	IGR	-0.544852	0.00590329
LUNG	M7	black	Female	%fat_change	0.658769	0.00756751
LUNG	M7	black	Female	bw_change	0.649057	0.00884218
LUNG	M7	black	Female	%lean_change	-0.63867	0.0103854
LUNG	M7	black	Female	Lactate	-0.428764	0.0324689
LUNG	M7	black	Female	Glucagon	0.42338	0.0349561
LUNG	M7	black	Female	Max_Speed	-0.511849	0.0511205
LUNG	M7	black	Female	Leptin	-0.388403	0.0550231
LUNG	M7	black	Female	VO2max_change	-0.460338	0.0842196
LUNG	M7	black	Female	Insulin	-0.235403	0.268155
LUNG	M7	black	Female	NEFA	-0.180911	0.38681
LUNG	M7	black	Female	Corticosterone	0.178306	0.393797
LUNG	M7	black	Female	HOMA_IR	-0.148389	0.47901
LUNG	M7	black	Female	Glycerol	-0.0716196	0.733705
LUNG	M7	black	Female	Area_ScWAT	0.0931836	0.741167
LUNG	M7	black	Female	Count_ScWAT	-0.0180809	0.949005
LUNG	M8	pink	Female	IGR	-0.330096	0.115179
LUNG	M8	pink	Female	Leptin	-0.302221	0.142014
LUNG	M8	pink	Female	Max_Speed	0.395244	0.144804
LUNG	M8	pink	Female	HOMA_IR	-0.248505	0.230989
LUNG	M8	pink	Female	VO2max_change	0.269401	0.331557
LUNG	M8	pink	Female	Area_ScWAT	0.255805	0.357458
LUNG	M8	pink	Female	%lean_change	0.242145	0.384568
LUNG	M8	pink	Female	Insulin	-0.157413	0.462585
LUNG	M8	pink	Female	Glucagon	0.136627	0.514902
LUNG	M8	pink	Female	%fat_change	-0.120368	0.66916
LUNG	M8	pink	Female	Total_ketones	0.0479606	0.819913
LUNG	M8	pink	Female	bw_change	-0.0434083	0.877921
LUNG	M8	pink	Female	Lactate	-0.0321067	0.878908
LUNG	M8	pink	Female	Corticosterone	-0.0247578	0.906488
LUNG	M8	pink	Female	Count_ScWAT	0.0256305	0.927756
LUNG	M8	pink	Female	Glucose	-0.00942528	0.964335
LUNG	M8	pink	Female	NEFA	0.00571741	0.978361
LUNG	M8	pink	Female	Glycerol	0.00178813	0.993232
LUNG	M9	magenta	Female	Leptin	-0.398906	0.0482356
LUNG	M9	magenta	Female	Glycerol	-0.344937	0.0912831
LUNG	M9	magenta	Female	Glucose	-0.300171	0.144872
LUNG	M9	magenta	Female	Insulin	0.290067	0.169148
LUNG	M9	magenta	Female	NEFA	-0.269679	0.192345
LUNG	M9	magenta	Female	Total_ketones	0.204581	0.32661
LUNG	M9	magenta	Female	Count_ScWAT	-0.226792	0.416314
LUNG	M9	magenta	Female	Glucagon	0.16003	0.444788
LUNG	M9	magenta	Female	Max_Speed	0.203352	0.467285
LUNG	M9	magenta	Female	Corticosterone	0.14178	0.499017
LUNG	M9	magenta	Female	Lactate	-0.139716	0.50535
LUNG	M9	magenta	Female	VO2max_change	0.150407	0.592618
LUNG	M9	magenta	Female	Area_ScWAT	-0.141418	0.615153
LUNG	M9	magenta	Female	%fat_change	-0.0959799	0.733656
LUNG	M9	magenta	Female	HOMA_IR	-0.0610838	0.771775
LUNG	M9	magenta	Female	IGR	-0.0516106	0.810717
LUNG	M9	magenta	Female	%lean_change	0.0423265	0.880943
LUNG	M9	magenta	Female	bw_change	0.0191058	0.946118
LUNG	NA	grey	Female	Max_Speed	-0.743091	0.00150153
LUNG	NA	grey	Female	Glycerol	0.558621	0.00370299
LUNG	NA	grey	Female	%lean_change	-0.680016	0.00528102
LUNG	NA	grey	Female	%fat_change	0.662096	0.00716576
LUNG	NA	grey	Female	Leptin	0.520121	0.0076951
LUNG	NA	grey	Female	bw_change	0.494568	0.0609127
LUNG	NA	grey	Female	VO2max_change	-0.475878	0.0729656
LUNG	NA	grey	Female	NEFA	0.359115	0.0779006
LUNG	NA	grey	Female	HOMA_IR	-0.227374	0.274367
LUNG	NA	grey	Female	Corticosterone	-0.208618	0.316945
LUNG	NA	grey	Female	Insulin	-0.195321	0.360379
LUNG	NA	grey	Female	Total_ketones	0.181884	0.384217
LUNG	NA	grey	Female	IGR	-0.150823	0.481759
LUNG	NA	grey	Female	Glucose	-0.0830319	0.693148
LUNG	NA	grey	Female	Area_ScWAT	0.0484093	0.86397
LUNG	NA	grey	Female	Lactate	-0.0234778	0.911304
LUNG	NA	grey	Female	Count_ScWAT	-0.0284193	0.919917
LUNG	NA	grey	Female	Glucagon	-0.0123287	0.953359
PLASMA	M1	turquoise	Female	Glucose	0.377386	0.0629173
PLASMA	M1	turquoise	Female	Lactate	0.356493	0.0802561
PLASMA	M1	turquoise	Female	Total_ketones	-0.320249	0.118595
PLASMA	M1	turquoise	Female	Corticosterone	-0.293086	0.155069
PLASMA	M1	turquoise	Female	VO2max_change	0.377236	0.165706
PLASMA	M1	turquoise	Female	NEFA	0.268687	0.194049
PLASMA	M1	turquoise	Female	Max_Speed	0.314851	0.25304
PLASMA	M1	turquoise	Female	Glycerol	0.171878	0.411343
PLASMA	M1	turquoise	Female	Count_ScWAT	-0.215999	0.439415
PLASMA	M1	turquoise	Female	Area_ScWAT	0.190646	0.496127
PLASMA	M1	turquoise	Female	%fat_change	0.178306	0.524911
PLASMA	M1	turquoise	Female	HOMA_IR	0.0966142	0.645935
PLASMA	M1	turquoise	Female	Insulin	0.0947395	0.659689
PLASMA	M1	turquoise	Female	Glucagon	-0.0777322	0.711887
PLASMA	M1	turquoise	Female	Leptin	0.0648098	0.758248
PLASMA	M1	turquoise	Female	IGR	0.0639156	0.766688
PLASMA	M1	turquoise	Female	%lean_change	0.0499499	0.85968
PLASMA	M1	turquoise	Female	bw_change	0.0112422	0.968281
PLASMA	M2	blue	Female	NEFA	-0.539644	0.005367
PLASMA	M2	blue	Female	Total_ketones	0.516541	0.00820233
PLASMA	M2	blue	Female	Lactate	-0.487188	0.0135094
PLASMA	M2	blue	Female	Leptin	-0.473072	0.0169238
PLASMA	M2	blue	Female	Glycerol	-0.443105	0.0265277
PLASMA	M2	blue	Female	Insulin	-0.43971	0.0315526
PLASMA	M2	blue	Female	Area_ScWAT	-0.458235	0.0858323
PLASMA	M2	blue	Female	Corticosterone	0.328603	0.108758
PLASMA	M2	blue	Female	IGR	-0.292093	0.166055
PLASMA	M2	blue	Female	Glucose	-0.273919	0.185175
PLASMA	M2	blue	Female	Max_Speed	-0.291706	0.291459
PLASMA	M2	blue	Female	Glucagon	0.210892	0.311578
PLASMA	M2	blue	Female	Count_ScWAT	-0.139534	0.619916
PLASMA	M2	blue	Female	%lean_change	0.100519	0.721511
PLASMA	M2	blue	Female	VO2max_change	-0.0936603	0.739885
PLASMA	M2	blue	Female	%fat_change	-0.0841164	0.765668
PLASMA	M2	blue	Female	HOMA_IR	-0.0444638	0.832855
PLASMA	M2	blue	Female	bw_change	-0.0407997	0.885211
PLASMA	M3	brown	Female	Total_ketones	-0.630871	0.000721856
PLASMA	M3	brown	Female	Leptin	0.539151	0.0054175
PLASMA	M3	brown	Female	Glycerol	0.397737	0.0489565
PLASMA	M3	brown	Female	Glucose	0.361799	0.0755442
PLASMA	M3	brown	Female	Lactate	0.354295	0.0822715
PLASMA	M3	brown	Female	Corticosterone	-0.33775	0.0986917
PLASMA	M3	brown	Female	NEFA	0.325634	0.112183
PLASMA	M3	brown	Female	VO2max_change	0.365158	0.180787
PLASMA	M3	brown	Female	IGR	0.261075	0.217863
PLASMA	M3	brown	Female	Glucagon	-0.227015	0.275146
PLASMA	M3	brown	Female	Area_ScWAT	0.278713	0.314453
PLASMA	M3	brown	Female	Insulin	0.15577	0.467328
PLASMA	M3	brown	Female	Max_Speed	0.178536	0.524368
PLASMA	M3	brown	Female	HOMA_IR	0.121249	0.563705
PLASMA	M3	brown	Female	bw_change	-0.130787	0.642221
PLASMA	M3	brown	Female	%lean_change	0.11554	0.681777
PLASMA	M3	brown	Female	Count_ScWAT	0.0860503	0.760424
PLASMA	M3	brown	Female	%fat_change	0.00411886	0.988377
PLASMA	M4	yellow	Female	Total_ketones	-0.697135	0.000107718
PLASMA	M4	yellow	Female	Leptin	0.586607	0.00205548
PLASMA	M4	yellow	Female	Lactate	0.516124	0.00826316
PLASMA	M4	yellow	Female	NEFA	0.430369	0.0317553
PLASMA	M4	yellow	Female	Glycerol	0.426662	0.0334225
PLASMA	M4	yellow	Female	Corticosterone	-0.420826	0.0361878
PLASMA	M4	yellow	Female	Glucose	0.419644	0.0367698
PLASMA	M4	yellow	Female	IGR	0.351842	0.0917856
PLASMA	M4	yellow	Female	Insulin	0.324144	0.122282
PLASMA	M4	yellow	Female	Area_ScWAT	0.369558	0.175193
PLASMA	M4	yellow	Female	Glucagon	-0.262192	0.205465
PLASMA	M4	yellow	Female	VO2max_change	0.288792	0.296527
PLASMA	M4	yellow	Female	Max_Speed	0.276029	0.31933
PLASMA	M4	yellow	Female	bw_change	-0.16341	0.560626
PLASMA	M4	yellow	Female	HOMA_IR	0.087231	0.678422
PLASMA	M4	yellow	Female	Count_ScWAT	0.106871	0.704621
PLASMA	M4	yellow	Female	%fat_change	-0.0903403	0.748826
PLASMA	M4	yellow	Female	%lean_change	0.0673061	0.811625
PLASMA	M5	green	Female	Total_ketones	0.760356	1.03e-05
PLASMA	M5	green	Female	Glucose	-0.574126	0.00268965
PLASMA	M5	green	Female	Leptin	-0.568956	0.00299739
PLASMA	M5	green	Female	Lactate	-0.495796	0.0117216
PLASMA	M5	green	Female	Glucagon	0.469481	0.0178966
PLASMA	M5	green	Female	IGR	-0.46037	0.0235883
PLASMA	M5	green	Female	Corticosterone	0.413584	0.0398691
PLASMA	M5	green	Female	NEFA	-0.386005	0.0566719
PLASMA	M5	green	Female	VO2max_change	-0.471835	0.0757826
PLASMA	M5	green	Female	Glycerol	-0.319078	0.120025
PLASMA	M5	green	Female	Max_Speed	-0.36684	0.178636
PLASMA	M5	green	Female	bw_change	0.347132	0.204915
PLASMA	M5	green	Female	Insulin	-0.242399	0.253772
PLASMA	M5	green	Female	%lean_change	-0.248352	0.372115
PLASMA	M5	green	Female	%fat_change	0.227567	0.414679
PLASMA	M5	green	Female	Area_ScWAT	-0.136867	0.626687
PLASMA	M5	green	Female	HOMA_IR	-0.062136	0.767948
PLASMA	M5	green	Female	Count_ScWAT	-0.0316589	0.91082
PLASMA	M6	red	Female	Glucose	-0.461274	0.0202919
PLASMA	M6	red	Female	Total_ketones	0.413311	0.0400136
PLASMA	M6	red	Female	Area_ScWAT	0.531053	0.0416536
PLASMA	M6	red	Female	VO2max_change	-0.397721	0.142075
PLASMA	M6	red	Female	Corticosterone	0.293586	0.154334
PLASMA	M6	red	Female	Insulin	0.294795	0.161992
PLASMA	M6	red	Female	Lactate	-0.280475	0.174456
PLASMA	M6	red	Female	bw_change	0.293994	0.287516
PLASMA	M6	red	Female	NEFA	0.125837	0.548932
PLASMA	M6	red	Female	HOMA_IR	0.11813	0.573853
PLASMA	M6	red	Female	Glycerol	-0.117433	0.576131
PLASMA	M6	red	Female	Max_Speed	-0.128978	0.646869
PLASMA	M6	red	Female	Count_ScWAT	-0.110036	0.696253
PLASMA	M6	red	Female	%lean_change	-0.101968	0.717648
PLASMA	M6	red	Female	Leptin	-0.0689858	0.743168
PLASMA	M6	red	Female	Glucagon	0.0677451	0.747639
PLASMA	M6	red	Female	IGR	0.0657859	0.760054
PLASMA	M6	red	Female	%fat_change	0.04351	0.877637
PLASMA	M7	black	Female	Total_ketones	-0.544818	0.00486077
PLASMA	M7	black	Female	Glycerol	0.482173	0.0146507
PLASMA	M7	black	Female	NEFA	0.450909	0.0236831
PLASMA	M7	black	Female	Lactate	0.434402	0.0300179
PLASMA	M7	black	Female	Leptin	0.386329	0.056447
PLASMA	M7	black	Female	Corticosterone	-0.373004	0.0662898
PLASMA	M7	black	Female	Max_Speed	0.456974	0.0868097
PLASMA	M7	black	Female	VO2max_change	0.425341	0.113974
PLASMA	M7	black	Female	Glucose	0.309964	0.131582
PLASMA	M7	black	Female	Insulin	0.284935	0.177162
PLASMA	M7	black	Female	Area_ScWAT	0.299498	0.27816
PLASMA	M7	black	Female	IGR	0.195103	0.360925
PLASMA	M7	black	Female	Count_ScWAT	0.210523	0.451379
PLASMA	M7	black	Female	Glucagon	-0.0948777	0.651902
PLASMA	M7	black	Female	%fat_change	0.087144	0.757463
PLASMA	M7	black	Female	HOMA_IR	0.0404981	0.847584
PLASMA	M7	black	Female	bw_change	-0.0508258	0.857243
PLASMA	M7	black	Female	%lean_change	0.0444949	0.874887
PLASMA	M8	pink	Female	Glycerol	0.607201	0.0012874
PLASMA	M8	pink	Female	Leptin	0.587561	0.00201278
PLASMA	M8	pink	Female	Max_Speed	-0.63931	0.0102846
PLASMA	M8	pink	Female	%lean_change	-0.62532	0.0126684
PLASMA	M8	pink	Female	VO2max_change	-0.523689	0.0451153
PLASMA	M8	pink	Female	NEFA	0.398942	0.0482137
PLASMA	M8	pink	Female	%fat_change	0.51299	0.0505179
PLASMA	M8	pink	Female	bw_change	0.440172	0.100594
PLASMA	M8	pink	Female	Insulin	0.329024	0.116436
PLASMA	M8	pink	Female	Corticosterone	-0.285389	0.166711
PLASMA	M8	pink	Female	Glucose	-0.239393	0.249099
PLASMA	M8	pink	Female	Area_ScWAT	0.3142	0.254076
PLASMA	M8	pink	Female	IGR	0.0940571	0.661998
PLASMA	M8	pink	Female	Count_ScWAT	0.112893	0.688726
PLASMA	M8	pink	Female	Lactate	0.0780094	0.710903
PLASMA	M8	pink	Female	HOMA_IR	-0.0342108	0.871035
PLASMA	M8	pink	Female	Glucagon	-0.0040612	0.984629
PLASMA	M8	pink	Female	Total_ketones	-0.00181142	0.993144
PLASMA	M9	magenta	Female	Total_ketones	-0.763356	9.05588e-06
PLASMA	M9	magenta	Female	Leptin	0.639386	0.000579416
PLASMA	M9	magenta	Female	Glucose	0.555657	0.00392956
PLASMA	M9	magenta	Female	Lactate	0.396674	0.0496198
PLASMA	M9	magenta	Female	Glucagon	-0.333264	0.103538
PLASMA	M9	magenta	Female	IGR	0.277052	0.189977
PLASMA	M9	magenta	Female	Corticosterone	-0.222164	0.285809
PLASMA	M9	magenta	Female	bw_change	-0.235516	0.398112
PLASMA	M9	magenta	Female	%fat_change	-0.220359	0.430005
PLASMA	M9	magenta	Female	Count_ScWAT	-0.19781	0.479764
PLASMA	M9	magenta	Female	HOMA_IR	0.145178	0.488681
PLASMA	M9	magenta	Female	%lean_change	0.130691	0.642466
PLASMA	M9	magenta	Female	VO2max_change	0.119975	0.670185
PLASMA	M9	magenta	Female	NEFA	0.0675712	0.748266
PLASMA	M9	magenta	Female	Area_ScWAT	0.0633367	0.822567
PLASMA	M9	magenta	Female	Glycerol	0.0407111	0.846791
PLASMA	M9	magenta	Female	Max_Speed	-0.0470766	0.867685
PLASMA	M9	magenta	Female	Insulin	0.0218241	0.919376
PLASMA	NA	grey	Female	Leptin	-0.594536	0.001723
PLASMA	NA	grey	Female	Max_Speed	0.45276	0.0901329
PLASMA	NA	grey	Female	IGR	-0.34038	0.103626
PLASMA	NA	grey	Female	Glucagon	0.308681	0.13327
PLASMA	NA	grey	Female	Glycerol	-0.276301	0.18123
PLASMA	NA	grey	Female	Total_ketones	0.258877	0.211464
PLASMA	NA	grey	Female	Insulin	-0.257343	0.22475
PLASMA	NA	grey	Female	Area_ScWAT	-0.296251	0.283657
PLASMA	NA	grey	Female	NEFA	-0.171668	0.411923
PLASMA	NA	grey	Female	VO2max_change	0.182066	0.516062
PLASMA	NA	grey	Female	%lean_change	0.176538	0.529095
PLASMA	NA	grey	Female	Lactate	-0.1098	0.601337
PLASMA	NA	grey	Female	Corticosterone	0.0811522	0.699775
PLASMA	NA	grey	Female	%fat_change	-0.100026	0.722828
PLASMA	NA	grey	Female	bw_change	-0.0722397	0.798071
PLASMA	NA	grey	Female	Glucose	0.0269436	0.898272
PLASMA	NA	grey	Female	HOMA_IR	0.0216516	0.918179
PLASMA	NA	grey	Female	Count_ScWAT	-0.0283704	0.920055
SKM-GN	M1	turquoise	Female	%fat_change	0.631249	0.0154757
SKM-GN	M1	turquoise	Female	bw_change	0.591254	0.0259566
SKM-GN	M1	turquoise	Female	%lean_change	-0.559784	0.0373748
SKM-GN	M1	turquoise	Female	Glycerol	0.418155	0.05279
SKM-GN	M1	turquoise	Female	Corticosterone	-0.382481	0.0789549
SKM-GN	M1	turquoise	Female	Max_Speed	-0.382698	0.176851
SKM-GN	M1	turquoise	Female	Total_ketones	0.286029	0.196897
SKM-GN	M1	turquoise	Female	NEFA	0.276057	0.213655
SKM-GN	M1	turquoise	Female	Area_ScWAT	0.313121	0.275683
SKM-GN	M1	turquoise	Female	Leptin	0.199115	0.374348
SKM-GN	M1	turquoise	Female	VO2max_change	-0.242788	0.402955
SKM-GN	M1	turquoise	Female	HOMA_IR	-0.184059	0.412238
SKM-GN	M1	turquoise	Female	Count_ScWAT	-0.236185	0.416259
SKM-GN	M1	turquoise	Female	IGR	-0.130806	0.561765
SKM-GN	M1	turquoise	Female	Glucose	-0.124203	0.58184
SKM-GN	M1	turquoise	Female	Insulin	-0.0862456	0.710102
SKM-GN	M1	turquoise	Female	Lactate	0.0728588	0.747287
SKM-GN	M1	turquoise	Female	Glucagon	-0.0110497	0.961076
SKM-GN	M2	blue	Female	%fat_change	-0.795362	0.000671337
SKM-GN	M2	blue	Female	Glycerol	-0.65994	0.000832054
SKM-GN	M2	blue	Female	%lean_change	0.68056	0.00738695
SKM-GN	M2	blue	Female	bw_change	-0.629604	0.0158295
SKM-GN	M2	blue	Female	NEFA	-0.451921	0.0347305
SKM-GN	M2	blue	Female	Leptin	-0.43262	0.0443307
SKM-GN	M2	blue	Female	Max_Speed	0.540547	0.0459651
SKM-GN	M2	blue	Female	Corticosterone	0.408978	0.058769
SKM-GN	M2	blue	Female	Lactate	-0.383313	0.0782509
SKM-GN	M2	blue	Female	VO2max_change	0.434926	0.120141
SKM-GN	M2	blue	Female	Area_ScWAT	-0.355888	0.21172
SKM-GN	M2	blue	Female	IGR	0.239744	0.282541
SKM-GN	M2	blue	Female	HOMA_IR	0.228535	0.306321
SKM-GN	M2	blue	Female	Count_ScWAT	0.204188	0.483799
SKM-GN	M2	blue	Female	Glucose	0.0799513	0.723577
SKM-GN	M2	blue	Female	Total_ketones	-0.0790383	0.726616
SKM-GN	M2	blue	Female	Insulin	0.0594098	0.798102
SKM-GN	M2	blue	Female	Glucagon	-0.0504849	0.823446
SKM-GN	M3	brown	Female	HOMA_IR	0.583193	0.00438822
SKM-GN	M3	brown	Female	Max_Speed	-0.53341	0.0494919
SKM-GN	M3	brown	Female	VO2max_change	-0.484522	0.0791194
SKM-GN	M3	brown	Female	IGR	0.337443	0.124584
SKM-GN	M3	brown	Female	Insulin	0.330394	0.143524
SKM-GN	M3	brown	Female	NEFA	-0.245719	0.270351
SKM-GN	M3	brown	Female	Lactate	-0.237919	0.286331
SKM-GN	M3	brown	Female	Glycerol	-0.236265	0.289794
SKM-GN	M3	brown	Female	Leptin	0.228573	0.306238
SKM-GN	M3	brown	Female	Count_ScWAT	-0.250038	0.388606
SKM-GN	M3	brown	Female	%lean_change	-0.154874	0.597036
SKM-GN	M3	brown	Female	Glucose	-0.115227	0.609618
SKM-GN	M3	brown	Female	%fat_change	-0.149018	0.611142
SKM-GN	M3	brown	Female	bw_change	0.0727228	0.804861
SKM-GN	M3	brown	Female	Area_ScWAT	-0.0693896	0.813659
SKM-GN	M3	brown	Female	Glucagon	0.0394225	0.861723
SKM-GN	M3	brown	Female	Total_ketones	0.0255931	0.909988
SKM-GN	M3	brown	Female	Corticosterone	0.0201134	0.929208
SKM-GN	M4	yellow	Female	Max_Speed	0.752075	0.00191775
SKM-GN	M4	yellow	Female	Total_ketones	-0.494054	0.0194368
SKM-GN	M4	yellow	Female	VO2max_change	0.603248	0.0223787
SKM-GN	M4	yellow	Female	Glucose	0.453868	0.0338612
SKM-GN	M4	yellow	Female	bw_change	-0.461064	0.0970492
SKM-GN	M4	yellow	Female	%lean_change	0.434226	0.120807
SKM-GN	M4	yellow	Female	Glucagon	-0.338712	0.123084
SKM-GN	M4	yellow	Female	Corticosterone	-0.306702	0.165041
SKM-GN	M4	yellow	Female	%fat_change	-0.358077	0.208723
SKM-GN	M4	yellow	Female	NEFA	0.278355	0.20971
SKM-GN	M4	yellow	Female	Count_ScWAT	0.339373	0.235199
SKM-GN	M4	yellow	Female	Lactate	0.261197	0.240342
SKM-GN	M4	yellow	Female	IGR	0.25494	0.2522
SKM-GN	M4	yellow	Female	Glycerol	0.153113	0.496331
SKM-GN	M4	yellow	Female	Area_ScWAT	-0.0865301	0.768657
SKM-GN	M4	yellow	Female	HOMA_IR	0.0254844	0.910369
SKM-GN	M4	yellow	Female	Insulin	-0.0176822	0.93936
SKM-GN	M4	yellow	Female	Leptin	-0.00555062	0.980442
SKM-GN	M5	green	Female	Max_Speed	0.741484	0.00240363
SKM-GN	M5	green	Female	bw_change	-0.716584	0.00393195
SKM-GN	M5	green	Female	%fat_change	-0.715388	0.00402096
SKM-GN	M5	green	Female	%lean_change	0.71183	0.00429519
SKM-GN	M5	green	Female	VO2max_change	0.614509	0.0193699
SKM-GN	M5	green	Female	Total_ketones	-0.489342	0.0208126
SKM-GN	M5	green	Female	Glucose	0.429757	0.045915
SKM-GN	M5	green	Female	Glucagon	-0.384344	0.0773852
SKM-GN	M5	green	Female	IGR	0.291315	0.188384
SKM-GN	M5	green	Female	Glycerol	-0.270843	0.222783
SKM-GN	M5	green	Female	Count_ScWAT	0.289288	0.315781
SKM-GN	M5	green	Female	Leptin	-0.191586	0.393039
SKM-GN	M5	green	Female	Area_ScWAT	-0.170555	0.55992
SKM-GN	M5	green	Female	Corticosterone	0.101536	0.652989
SKM-GN	M5	green	Female	Insulin	-0.0729782	0.753241
SKM-GN	M5	green	Female	NEFA	-0.0573654	0.799828
SKM-GN	M5	green	Female	Lactate	0.0446144	0.843716
SKM-GN	M5	green	Female	HOMA_IR	-0.0380312	0.86656
SKM-GN	M6	red	Female	Max_Speed	0.740584	0.00244904
SKM-GN	M6	red	Female	Leptin	-0.610427	0.0025519
SKM-GN	M6	red	Female	%fat_change	-0.708581	0.00455822
SKM-GN	M6	red	Female	Glycerol	-0.58058	0.00461124
SKM-GN	M6	red	Female	%lean_change	0.672705	0.00838335
SKM-GN	M6	red	Female	bw_change	-0.569689	0.0334447
SKM-GN	M6	red	Female	VO2max_change	0.553375	0.0400927
SKM-GN	M6	red	Female	Corticosterone	0.425552	0.0483215
SKM-GN	M6	red	Female	NEFA	-0.347512	0.113039
SKM-GN	M6	red	Female	Lactate	-0.327505	0.136789
SKM-GN	M6	red	Female	HOMA_IR	0.173742	0.439367
SKM-GN	M6	red	Female	Count_ScWAT	0.195052	0.503981
SKM-GN	M6	red	Female	Glucagon	0.146625	0.514967
SKM-GN	M6	red	Female	Area_ScWAT	-0.149944	0.608902
SKM-GN	M6	red	Female	Total_ketones	0.0815516	0.71826
SKM-GN	M6	red	Female	Insulin	-0.0790692	0.733339
SKM-GN	M6	red	Female	Glucose	-0.0681628	0.763109
SKM-GN	M6	red	Female	IGR	-0.0102094	0.964034
SKM-GN	M7	black	Female	Glucose	-0.346763	0.11387
SKM-GN	M7	black	Female	Leptin	-0.277674	0.210874
SKM-GN	M7	black	Female	Count_ScWAT	-0.319542	0.265423
SKM-GN	M7	black	Female	Glycerol	-0.222805	0.318936
SKM-GN	M7	black	Female	Total_ketones	0.203506	0.363684
SKM-GN	M7	black	Female	Corticosterone	0.190093	0.396807
SKM-GN	M7	black	Female	Insulin	0.181354	0.431436
SKM-GN	M7	black	Female	Max_Speed	-0.208231	0.474993
SKM-GN	M7	black	Female	Glucagon	0.158161	0.482068
SKM-GN	M7	black	Female	bw_change	0.199079	0.495038
SKM-GN	M7	black	Female	NEFA	-0.120624	0.592849
SKM-GN	M7	black	Female	%fat_change	0.111535	0.704238
SKM-GN	M7	black	Female	Area_ScWAT	0.108446	0.712106
SKM-GN	M7	black	Female	IGR	-0.0580438	0.797508
SKM-GN	M7	black	Female	VO2max_change	-0.0728213	0.804602
SKM-GN	M7	black	Female	%lean_change	-0.0715444	0.807969
SKM-GN	M7	black	Female	Lactate	-0.0537093	0.812358
SKM-GN	M7	black	Female	HOMA_IR	0.0290997	0.897714
SKM-GN	M8	pink	Female	Glycerol	-0.326194	0.13846
SKM-GN	M8	pink	Female	Area_ScWAT	-0.404425	0.151492
SKM-GN	M8	pink	Female	Lactate	-0.30298	0.170492
SKM-GN	M8	pink	Female	IGR	0.286552	0.196042
SKM-GN	M8	pink	Female	%fat_change	-0.347129	0.223982
SKM-GN	M8	pink	Female	Corticosterone	0.222001	0.320731
SKM-GN	M8	pink	Female	%lean_change	0.267964	0.354316
SKM-GN	M8	pink	Female	NEFA	-0.20367	0.36329
SKM-GN	M8	pink	Female	Insulin	0.199387	0.386214
SKM-GN	M8	pink	Female	Leptin	-0.192119	0.391701
SKM-GN	M8	pink	Female	bw_change	-0.231525	0.425781
SKM-GN	M8	pink	Female	VO2max_change	0.209546	0.472144
SKM-GN	M8	pink	Female	Glucagon	-0.126036	0.576236
SKM-GN	M8	pink	Female	HOMA_IR	0.107179	0.634972
SKM-GN	M8	pink	Female	Max_Speed	0.131293	0.654589
SKM-GN	M8	pink	Female	Count_ScWAT	0.101427	0.730085
SKM-GN	M8	pink	Female	Glucose	-0.0453444	0.84119
SKM-GN	M8	pink	Female	Total_ketones	0.0151621	0.946606
SKM-GN	M9	magenta	Female	Total_ketones	0.519137	0.013293
SKM-GN	M9	magenta	Female	Lactate	-0.503913	0.0167952
SKM-GN	M9	magenta	Female	Glycerol	-0.437479	0.0417394
SKM-GN	M9	magenta	Female	Glucose	-0.419013	0.0522556
SKM-GN	M9	magenta	Female	Corticosterone	0.366361	0.0935484
SKM-GN	M9	magenta	Female	NEFA	-0.34567	0.115091
SKM-GN	M9	magenta	Female	Leptin	-0.322836	0.142806
SKM-GN	M9	magenta	Female	VO2max_change	-0.334917	0.241798
SKM-GN	M9	magenta	Female	Max_Speed	-0.328598	0.251346
SKM-GN	M9	magenta	Female	Area_ScWAT	-0.297392	0.301792
SKM-GN	M9	magenta	Female	Glucagon	0.199738	0.372825
SKM-GN	M9	magenta	Female	HOMA_IR	0.179669	0.423669
SKM-GN	M9	magenta	Female	Count_ScWAT	-0.144125	0.623023
SKM-GN	M9	magenta	Female	Insulin	0.09168	0.692667
SKM-GN	M9	magenta	Female	%fat_change	-0.114036	0.697889
SKM-GN	M9	magenta	Female	bw_change	0.0966756	0.742327
SKM-GN	M9	magenta	Female	IGR	0.0412156	0.855496
SKM-GN	M9	magenta	Female	%lean_change	-0.0407295	0.890048
SKM-GN	NA	grey	Female	bw_change	-0.601001	0.0230188
SKM-GN	NA	grey	Female	Count_ScWAT	0.499103	0.0692333
SKM-GN	NA	grey	Female	Leptin	-0.342144	0.119093
SKM-GN	NA	grey	Female	Insulin	-0.323247	0.152915
SKM-GN	NA	grey	Female	%lean_change	0.358468	0.208189
SKM-GN	NA	grey	Female	Area_ScWAT	-0.358192	0.208566
SKM-GN	NA	grey	Female	%fat_change	-0.317139	0.269236
SKM-GN	NA	grey	Female	Glucose	0.236383	0.289546
SKM-GN	NA	grey	Female	VO2max_change	0.254593	0.379733
SKM-GN	NA	grey	Female	Max_Speed	0.231152	0.426548
SKM-GN	NA	grey	Female	NEFA	-0.174031	0.438595
SKM-GN	NA	grey	Female	Lactate	-0.153044	0.496529
SKM-GN	NA	grey	Female	HOMA_IR	-0.121905	0.588898
SKM-GN	NA	grey	Female	IGR	-0.0949104	0.674387
SKM-GN	NA	grey	Female	Corticosterone	0.0845728	0.708257
SKM-GN	NA	grey	Female	Glucagon	0.00708517	0.975036
SKM-GN	NA	grey	Female	Glycerol	0.00471537	0.983384
SKM-GN	NA	grey	Female	Total_ketones	0.00152595	0.994623
WAT-SC	M1	turquoise	Female	Glucagon	-0.531681	0.0074978
WAT-SC	M1	turquoise	Female	Leptin	0.45475	0.0255734
WAT-SC	M1	turquoise	Female	IGR	0.400971	0.0579332
WAT-SC	M1	turquoise	Female	Glycerol	0.378741	0.0679902
WAT-SC	M1	turquoise	Female	NEFA	0.366371	0.078265
WAT-SC	M1	turquoise	Female	Glucose	0.356093	0.0876616
WAT-SC	M1	turquoise	Female	Count_ScWAT	0.41419	0.140924
WAT-SC	M1	turquoise	Female	Corticosterone	-0.299143	0.155601
WAT-SC	M1	turquoise	Female	Total_ketones	-0.290435	0.168583
WAT-SC	M1	turquoise	Female	HOMA_IR	-0.166764	0.436074
WAT-SC	M1	turquoise	Female	Insulin	-0.155207	0.47948
WAT-SC	M1	turquoise	Female	Area_ScWAT	-0.162232	0.579501
WAT-SC	M1	turquoise	Female	Lactate	0.10295	0.632152
WAT-SC	M1	turquoise	Female	bw_change	-0.132808	0.650833
WAT-SC	M1	turquoise	Female	Max_Speed	0.0955604	0.745209
WAT-SC	M1	turquoise	Female	%fat_change	0.0527875	0.857764
WAT-SC	M1	turquoise	Female	%lean_change	-0.0521245	0.859534
WAT-SC	M1	turquoise	Female	VO2max_change	-0.0475664	0.87172
WAT-SC	M2	blue	Female	Leptin	-0.611988	0.00148208
WAT-SC	M2	blue	Female	Glycerol	-0.417173	0.0425437
WAT-SC	M2	blue	Female	Glucagon	0.41316	0.0447825
WAT-SC	M2	blue	Female	Corticosterone	0.409312	0.0470158
WAT-SC	M2	blue	Female	NEFA	-0.369856	0.0752583
WAT-SC	M2	blue	Female	Max_Speed	0.461029	0.0970779
WAT-SC	M2	blue	Female	IGR	-0.327633	0.126978
WAT-SC	M2	blue	Female	%lean_change	0.416222	0.138788
WAT-SC	M2	blue	Female	VO2max_change	0.395682	0.161389
WAT-SC	M2	blue	Female	%fat_change	-0.368313	0.195063
WAT-SC	M2	blue	Female	Total_ketones	0.263022	0.214325
WAT-SC	M2	blue	Female	Glucose	-0.251216	0.236369
WAT-SC	M2	blue	Female	Lactate	-0.182334	0.393799
WAT-SC	M2	blue	Female	bw_change	-0.234012	0.420685
WAT-SC	M2	blue	Female	Count_ScWAT	0.0891417	0.761856
WAT-SC	M2	blue	Female	Insulin	-0.0521073	0.813338
WAT-SC	M2	blue	Female	Area_ScWAT	-0.0669724	0.820052
WAT-SC	M2	blue	Female	HOMA_IR	0.0477818	0.824538
WAT-SC	M3	brown	Female	Glycerol	0.613257	0.00143959
WAT-SC	M3	brown	Female	NEFA	0.587361	0.00254667
WAT-SC	M3	brown	Female	Leptin	0.571467	0.00353317
WAT-SC	M3	brown	Female	Corticosterone	-0.539912	0.00646433
WAT-SC	M3	brown	Female	%lean_change	-0.60916	0.0207583
WAT-SC	M3	brown	Female	%fat_change	0.56195	0.0364877
WAT-SC	M3	brown	Female	Glucagon	-0.406707	0.0485761
WAT-SC	M3	brown	Female	IGR	0.305035	0.156977
WAT-SC	M3	brown	Female	bw_change	0.379988	0.180193
WAT-SC	M3	brown	Female	Max_Speed	-0.362288	0.203032
WAT-SC	M3	brown	Female	Lactate	0.253267	0.232437
WAT-SC	M3	brown	Female	Total_ketones	-0.244352	0.249848
WAT-SC	M3	brown	Female	VO2max_change	-0.326623	0.254377
WAT-SC	M3	brown	Female	Glucose	0.160604	0.453448
WAT-SC	M3	brown	Female	Insulin	0.159119	0.468333
WAT-SC	M3	brown	Female	Area_ScWAT	0.179693	0.538753
WAT-SC	M3	brown	Female	HOMA_IR	-0.0783289	0.716003
WAT-SC	M3	brown	Female	Count_ScWAT	-0.00558974	0.984869
WAT-SC	M4	yellow	Female	Leptin	0.669646	0.000344741
WAT-SC	M4	yellow	Female	VO2max_change	-0.486503	0.077721
WAT-SC	M4	yellow	Female	Max_Speed	-0.475763	0.0855155
WAT-SC	M4	yellow	Female	IGR	0.353156	0.0983333
WAT-SC	M4	yellow	Female	Glycerol	0.295001	0.161686
WAT-SC	M4	yellow	Female	Insulin	0.23841	0.273295
WAT-SC	M4	yellow	Female	Glucagon	-0.232942	0.273336
WAT-SC	M4	yellow	Female	Count_ScWAT	0.300319	0.296829
WAT-SC	M4	yellow	Female	NEFA	0.194669	0.362016
WAT-SC	M4	yellow	Female	Total_ketones	-0.186931	0.381774
WAT-SC	M4	yellow	Female	%lean_change	-0.216696	0.456805
WAT-SC	M4	yellow	Female	HOMA_IR	0.098136	0.648243
WAT-SC	M4	yellow	Female	Area_ScWAT	0.105991	0.718378
WAT-SC	M4	yellow	Female	%fat_change	0.0897811	0.760193
WAT-SC	M4	yellow	Female	Glucose	0.0450307	0.8345
WAT-SC	M4	yellow	Female	bw_change	0.0502254	0.864608
WAT-SC	M4	yellow	Female	Lactate	-0.0308107	0.886356
WAT-SC	M4	yellow	Female	Corticosterone	-0.00966881	0.964235
WAT-SC	M5	green	Female	Glucagon	0.50159	0.0125176
WAT-SC	M5	green	Female	Leptin	-0.49534	0.013847
WAT-SC	M5	green	Female	Corticosterone	0.37438	0.0714876
WAT-SC	M5	green	Female	IGR	-0.382655	0.0715283
WAT-SC	M5	green	Female	Glycerol	-0.313076	0.136324
WAT-SC	M5	green	Female	NEFA	-0.304616	0.147812
WAT-SC	M5	green	Female	Max_Speed	0.321133	0.262917
WAT-SC	M5	green	Female	Total_ketones	0.228922	0.281935
WAT-SC	M5	green	Female	%lean_change	0.297674	0.301311
WAT-SC	M5	green	Female	%fat_change	-0.279571	0.333034
WAT-SC	M5	green	Female	Glucose	-0.203363	0.34054
WAT-SC	M5	green	Female	VO2max_change	0.211709	0.467478
WAT-SC	M5	green	Female	bw_change	-0.135921	0.643139
WAT-SC	M5	green	Female	Count_ScWAT	0.0632262	0.82998
WAT-SC	M5	green	Female	HOMA_IR	0.0447806	0.835407
WAT-SC	M5	green	Female	Lactate	-0.0280671	0.89642
WAT-SC	M5	green	Female	Insulin	-0.0274587	0.901025
WAT-SC	M5	green	Female	Area_ScWAT	0.0274811	0.925701
WAT-SC	M6	red	Female	NEFA	0.333247	0.111544
WAT-SC	M6	red	Female	%fat_change	0.426322	0.128494
WAT-SC	M6	red	Female	%lean_change	-0.417232	0.137735
WAT-SC	M6	red	Female	Corticosterone	-0.289334	0.170277
WAT-SC	M6	red	Female	Glycerol	0.268058	0.205357
WAT-SC	M6	red	Female	Glucagon	-0.251669	0.235498
WAT-SC	M6	red	Female	Area_ScWAT	0.244445	0.399651
WAT-SC	M6	red	Female	bw_change	0.217521	0.45505
WAT-SC	M6	red	Female	HOMA_IR	-0.142407	0.506817
WAT-SC	M6	red	Female	Count_ScWAT	-0.184985	0.526655
WAT-SC	M6	red	Female	Max_Speed	-0.176635	0.545796
WAT-SC	M6	red	Female	Leptin	0.12604	0.557302
WAT-SC	M6	red	Female	VO2max_change	-0.135389	0.644451
WAT-SC	M6	red	Female	Glucose	-0.0747323	0.728551
WAT-SC	M6	red	Female	Total_ketones	0.0458057	0.831691
WAT-SC	M6	red	Female	Lactate	0.0425108	0.843647
WAT-SC	M6	red	Female	IGR	-0.00983322	0.964482
WAT-SC	M6	red	Female	Insulin	-0.00279663	0.989896
WAT-SC	M7	black	Female	IGR	-0.419019	0.0465745
WAT-SC	M7	black	Female	Leptin	-0.350998	0.0926214
WAT-SC	M7	black	Female	Count_ScWAT	-0.463131	0.0953655
WAT-SC	M7	black	Female	Glucagon	0.34146	0.102465
WAT-SC	M7	black	Female	Glycerol	-0.217549	0.307173
WAT-SC	M7	black	Female	NEFA	-0.193636	0.364617
WAT-SC	M7	black	Female	VO2max_change	0.232228	0.424337
WAT-SC	M7	black	Female	Lactate	0.158883	0.458365
WAT-SC	M7	black	Female	HOMA_IR	-0.110442	0.60743
WAT-SC	M7	black	Female	Total_ketones	0.0971867	0.651434
WAT-SC	M7	black	Female	%lean_change	0.129747	0.658428
WAT-SC	M7	black	Female	Insulin	-0.083705	0.704156
WAT-SC	M7	black	Female	%fat_change	-0.10852	0.711919
WAT-SC	M7	black	Female	Max_Speed	0.103243	0.725419
WAT-SC	M7	black	Female	Area_ScWAT	0.0953719	0.745697
WAT-SC	M7	black	Female	Corticosterone	0.0601757	0.780003
WAT-SC	M7	black	Female	Glucose	-0.0421797	0.844851
WAT-SC	M7	black	Female	bw_change	0.0324238	0.912381
WAT-SC	M8	pink	Female	Leptin	0.4536	0.0259959
WAT-SC	M8	pink	Female	Insulin	0.320775	0.135605
WAT-SC	M8	pink	Female	Lactate	0.296896	0.158881
WAT-SC	M8	pink	Female	Area_ScWAT	0.374098	0.187601
WAT-SC	M8	pink	Female	Total_ketones	-0.277129	0.189849
WAT-SC	M8	pink	Female	Glycerol	0.226699	0.286762
WAT-SC	M8	pink	Female	HOMA_IR	0.196803	0.356671
WAT-SC	M8	pink	Female	Glucose	0.181735	0.395382
WAT-SC	M8	pink	Female	NEFA	0.170387	0.426026
WAT-SC	M8	pink	Female	Max_Speed	-0.221521	0.44659
WAT-SC	M8	pink	Female	Glucagon	0.159653	0.456162
WAT-SC	M8	pink	Female	VO2max_change	-0.215365	0.459641
WAT-SC	M8	pink	Female	Count_ScWAT	-0.132857	0.650712
WAT-SC	M8	pink	Female	Corticosterone	-0.020968	0.922529
WAT-SC	M8	pink	Female	IGR	-0.0183072	0.933924
WAT-SC	M8	pink	Female	%lean_change	-0.0232992	0.936985
WAT-SC	M8	pink	Female	%fat_change	-0.0163428	0.955779
WAT-SC	M8	pink	Female	bw_change	-0.00392938	0.989363
WAT-SC	M9	magenta	Female	Count_ScWAT	-0.480031	0.0823557
WAT-SC	M9	magenta	Female	IGR	-0.325577	0.129522
WAT-SC	M9	magenta	Female	Leptin	-0.249282	0.240118
WAT-SC	M9	magenta	Female	HOMA_IR	-0.248493	0.241658
WAT-SC	M9	magenta	Female	Insulin	-0.235873	0.278584
WAT-SC	M9	magenta	Female	NEFA	-0.143552	0.503371
WAT-SC	M9	magenta	Female	Glycerol	-0.139423	0.515853
WAT-SC	M9	magenta	Female	Total_ketones	0.135418	0.528098
WAT-SC	M9	magenta	Female	Lactate	0.0987129	0.646306
WAT-SC	M9	magenta	Female	Glucagon	0.0960012	0.655428
WAT-SC	M9	magenta	Female	VO2max_change	0.122419	0.676739
WAT-SC	M9	magenta	Female	Glucose	-0.0853331	0.691771
WAT-SC	M9	magenta	Female	Corticosterone	-0.073026	0.734528
WAT-SC	M9	magenta	Female	Max_Speed	-0.0911546	0.756625
WAT-SC	M9	magenta	Female	%lean_change	-0.0804476	0.784557
WAT-SC	M9	magenta	Female	bw_change	0.0671606	0.819554
WAT-SC	M9	magenta	Female	Area_ScWAT	0.0304996	0.917565
WAT-SC	M9	magenta	Female	%fat_change	0.024622	0.933415
WAT-SC	NA	grey	Female	Corticosterone	-0.59354	0.0022322
WAT-SC	NA	grey	Female	NEFA	0.488112	0.0155266
WAT-SC	NA	grey	Female	Glycerol	0.428471	0.0367092
WAT-SC	NA	grey	Female	Lactate	0.427597	0.0371369
WAT-SC	NA	grey	Female	Total_ketones	-0.352915	0.090731
WAT-SC	NA	grey	Female	Glucagon	-0.30948	0.141127
WAT-SC	NA	grey	Female	Glucose	0.291872	0.166391
WAT-SC	NA	grey	Female	Leptin	0.277543	0.18916
WAT-SC	NA	grey	Female	Max_Speed	0.33481	0.241959
WAT-SC	NA	grey	Female	VO2max_change	0.222029	0.445523
WAT-SC	NA	grey	Female	HOMA_IR	-0.144941	0.499207
WAT-SC	NA	grey	Female	Area_ScWAT	0.193944	0.506454
WAT-SC	NA	grey	Female	Count_ScWAT	-0.13339	0.64939
WAT-SC	NA	grey	Female	%fat_change	0.106858	0.716162
WAT-SC	NA	grey	Female	IGR	0.074341	0.736033
WAT-SC	NA	grey	Female	%lean_change	-0.042179	0.886158
WAT-SC	NA	grey	Female	Insulin	-0.0142431	0.948571
WAT-SC	NA	grey	Female	bw_change	-0.0110766	0.970021
BAT	M1	turquoise	Male	Max_Speed	0.68473	0.0289215
BAT	M1	turquoise	Male	NEFA	0.438993	0.0600568
BAT	M1	turquoise	Male	Glucose	-0.427587	0.0678324
BAT	M1	turquoise	Male	Count_ScWAT	0.577856	0.0801891
BAT	M1	turquoise	Male	Insulin	0.403774	0.120904
BAT	M1	turquoise	Male	%fat_change	-0.505638	0.135968
BAT	M1	turquoise	Male	VO2max_change	0.474168	0.166191
BAT	M1	turquoise	Male	%lean_change	0.400346	0.251624
BAT	M1	turquoise	Male	Leptin	-0.218304	0.369259
BAT	M1	turquoise	Male	Glycerol	0.209356	0.389679
BAT	M1	turquoise	Male	bw_change	-0.27653	0.439264
BAT	M1	turquoise	Male	Corticosterone	-0.186833	0.443747
BAT	M1	turquoise	Male	Lactate	0.162883	0.518423
BAT	M1	turquoise	Male	HOMA_IR	-0.107648	0.660915
BAT	M1	turquoise	Male	Total_ketones	-0.100562	0.682082
BAT	M1	turquoise	Male	Area_ScWAT	0.118903	0.743545
BAT	M1	turquoise	Male	Glucagon	0.0414278	0.866275
BAT	M1	turquoise	Male	IGR	0.0402605	0.873975
BAT	M2	blue	Male	Glycerol	0.511817	0.0250846
BAT	M2	blue	Male	Area_ScWAT	0.643831	0.044552
BAT	M2	blue	Male	Leptin	-0.382413	0.106127
BAT	M2	blue	Male	Corticosterone	0.358527	0.131728
BAT	M2	blue	Male	Count_ScWAT	-0.421622	0.224908
BAT	M2	blue	Male	%fat_change	0.380664	0.277831
BAT	M2	blue	Male	%lean_change	-0.380253	0.278394
BAT	M2	blue	Male	Max_Speed	-0.335276	0.343615
BAT	M2	blue	Male	Total_ketones	0.217112	0.371943
BAT	M2	blue	Male	VO2max_change	-0.252402	0.481721
BAT	M2	blue	Male	Glucagon	-0.171458	0.48277
BAT	M2	blue	Male	NEFA	0.165724	0.497742
BAT	M2	blue	Male	Insulin	-0.16099	0.551422
BAT	M2	blue	Male	HOMA_IR	0.113401	0.643907
BAT	M2	blue	Male	Lactate	0.116561	0.645087
BAT	M2	blue	Male	Glucose	0.0683348	0.781037
BAT	M2	blue	Male	IGR	-0.0515021	0.839172
BAT	M2	blue	Male	bw_change	0.0410724	0.910306
BAT	M3	brown	Male	Area_ScWAT	0.580411	0.0785483
BAT	M3	brown	Male	IGR	-0.372829	0.127564
BAT	M3	brown	Male	Leptin	-0.350983	0.140647
BAT	M3	brown	Male	Glycerol	0.31601	0.187497
BAT	M3	brown	Male	bw_change	0.360852	0.305641
BAT	M3	brown	Male	Count_ScWAT	0.293761	0.410039
BAT	M3	brown	Male	Corticosterone	0.182859	0.453673
BAT	M3	brown	Male	NEFA	0.148851	0.543066
BAT	M3	brown	Male	%fat_change	-0.150618	0.677897
BAT	M3	brown	Male	Insulin	-0.0871973	0.748128
BAT	M3	brown	Male	%lean_change	-0.113957	0.75393
BAT	M3	brown	Male	Glucose	0.0687288	0.779804
BAT	M3	brown	Male	Glucagon	0.0570396	0.816586
BAT	M3	brown	Male	VO2max_change	0.0735182	0.840045
BAT	M3	brown	Male	Lactate	-0.0452026	0.858644
BAT	M3	brown	Male	Total_ketones	-0.0322069	0.895863
BAT	M3	brown	Male	Max_Speed	-0.0461447	0.899273
BAT	M3	brown	Male	HOMA_IR	-0.00382356	0.987605
BAT	M4	yellow	Male	%fat_change	0.644282	0.0443542
BAT	M4	yellow	Male	Count_ScWAT	-0.589601	0.0728269
BAT	M4	yellow	Male	VO2max_change	-0.559267	0.0927929
BAT	M4	yellow	Male	Leptin	0.353534	0.137586
BAT	M4	yellow	Male	IGR	0.360052	0.142197
BAT	M4	yellow	Male	Max_Speed	-0.397665	0.255109
BAT	M4	yellow	Male	Total_ketones	0.256241	0.289641
BAT	M4	yellow	Male	bw_change	-0.338897	0.338099
BAT	M4	yellow	Male	Glucose	0.196338	0.420472
BAT	M4	yellow	Male	Corticosterone	-0.142007	0.561966
BAT	M4	yellow	Male	HOMA_IR	0.139753	0.568253
BAT	M4	yellow	Male	NEFA	-0.116777	0.634005
BAT	M4	yellow	Male	Glucagon	-0.0869681	0.723323
BAT	M4	yellow	Male	Area_ScWAT	-0.0923492	0.7997
BAT	M4	yellow	Male	Insulin	0.0418843	0.877599
BAT	M4	yellow	Male	Glycerol	-0.0292945	0.905237
BAT	M4	yellow	Male	%lean_change	-0.0319797	0.930116
BAT	M4	yellow	Male	Lactate	-0.00689684	0.978332
BAT	M5	green	Male	Leptin	0.758967	0.000164773
BAT	M5	green	Male	Glycerol	-0.446934	0.0550536
BAT	M5	green	Male	Area_ScWAT	-0.565619	0.0883528
BAT	M5	green	Male	%fat_change	0.539315	0.107655
BAT	M5	green	Male	Count_ScWAT	-0.518967	0.124271
BAT	M5	green	Male	Max_Speed	-0.507174	0.134587
BAT	M5	green	Male	Corticosterone	-0.351985	0.139439
BAT	M5	green	Male	Lactate	-0.316576	0.200573
BAT	M5	green	Male	VO2max_change	-0.409499	0.239923
BAT	M5	green	Male	IGR	0.291496	0.240541
BAT	M5	green	Male	NEFA	-0.198553	0.415143
BAT	M5	green	Male	Glucose	0.130407	0.594641
BAT	M5	green	Male	%lean_change	-0.161884	0.655014
BAT	M5	green	Male	bw_change	0.0679863	0.851966
BAT	M5	green	Male	HOMA_IR	-0.0397753	0.871566
BAT	M5	green	Male	Insulin	0.0310556	0.909101
BAT	M5	green	Male	Total_ketones	0.0198882	0.935591
BAT	M5	green	Male	Glucagon	-0.0187521	0.939263
BAT	M6	red	Male	Count_ScWAT	0.65426	0.0401293
BAT	M6	red	Male	Glycerol	-0.456589	0.0494031
BAT	M6	red	Male	%fat_change	-0.49493	0.14584
BAT	M6	red	Male	Glucagon	0.306924	0.201199
BAT	M6	red	Male	Total_ketones	-0.223067	0.358641
BAT	M6	red	Male	Corticosterone	0.211464	0.384813
BAT	M6	red	Male	bw_change	0.282705	0.428683
BAT	M6	red	Male	Max_Speed	0.248131	0.489416
BAT	M6	red	Male	Area_ScWAT	-0.228939	0.524629
BAT	M6	red	Male	IGR	-0.152	0.547108
BAT	M6	red	Male	NEFA	-0.137684	0.57405
BAT	M6	red	Male	HOMA_IR	0.134712	0.582424
BAT	M6	red	Male	VO2max_change	0.185755	0.607394
BAT	M6	red	Male	Lactate	0.0953673	0.706603
BAT	M6	red	Male	Glucose	-0.0565437	0.818155
BAT	M6	red	Male	Leptin	-0.0524629	0.831092
BAT	M6	red	Male	%lean_change	0.053141	0.884082
BAT	M6	red	Male	Insulin	-0.0297093	0.913028
BAT	M7	black	Male	Count_ScWAT	-0.678024	0.0311772
BAT	M7	black	Male	%fat_change	0.590789	0.0721076
BAT	M7	black	Male	Glucagon	-0.413709	0.0782775
BAT	M7	black	Male	Lactate	-0.301931	0.223341
BAT	M7	black	Male	%lean_change	-0.351618	0.319084
BAT	M7	black	Male	Max_Speed	-0.338335	0.338952
BAT	M7	black	Male	Leptin	0.223558	0.357556
BAT	M7	black	Male	IGR	0.219685	0.381082
BAT	M7	black	Male	NEFA	-0.206792	0.395642
BAT	M7	black	Male	Glucose	-0.163398	0.50388
BAT	M7	black	Male	VO2max_change	-0.213678	0.553344
BAT	M7	black	Male	Area_ScWAT	-0.207145	0.565819
BAT	M7	black	Male	Corticosterone	-0.108432	0.658587
BAT	M7	black	Male	Total_ketones	0.102041	0.677644
BAT	M7	black	Male	bw_change	-0.123153	0.734652
BAT	M7	black	Male	Insulin	-0.0624244	0.818352
BAT	M7	black	Male	Glycerol	-0.043108	0.860901
BAT	M7	black	Male	HOMA_IR	0.0384143	0.875928
BAT	M8	pink	Male	Leptin	0.444728	0.0564109
BAT	M8	pink	Male	Corticosterone	-0.362336	0.12738
BAT	M8	pink	Male	VO2max_change	0.345458	0.328222
BAT	M8	pink	Male	Area_ScWAT	-0.320113	0.367204
BAT	M8	pink	Male	%fat_change	-0.318326	0.370037
BAT	M8	pink	Male	Glucagon	0.215099	0.376502
BAT	M8	pink	Male	Glycerol	-0.190231	0.43535
BAT	M8	pink	Male	Insulin	0.187411	0.487035
BAT	M8	pink	Male	Glucose	0.156274	0.522901
BAT	M8	pink	Male	Count_ScWAT	0.216974	0.547089
BAT	M8	pink	Male	Total_ketones	-0.146932	0.548337
BAT	M8	pink	Male	HOMA_IR	-0.14348	0.557875
BAT	M8	pink	Male	Max_Speed	0.192394	0.594373
BAT	M8	pink	Male	IGR	0.121755	0.630321
BAT	M8	pink	Male	%lean_change	0.160582	0.657646
BAT	M8	pink	Male	Lactate	-0.10626	0.674743
BAT	M8	pink	Male	bw_change	0.134869	0.710282
BAT	M8	pink	Male	NEFA	0.038309	0.876266
BAT	M9	magenta	Male	Glycerol	-0.496892	0.0304411
BAT	M9	magenta	Male	Count_ScWAT	0.518781	0.124429
BAT	M9	magenta	Male	%fat_change	-0.462275	0.178572
BAT	M9	magenta	Male	Total_ketones	-0.287188	0.2332
BAT	M9	magenta	Male	Glucagon	0.255763	0.290572
BAT	M9	magenta	Male	Area_ScWAT	-0.355476	0.31343
BAT	M9	magenta	Male	Max_Speed	0.276971	0.438504
BAT	M9	magenta	Male	VO2max_change	0.265478	0.458495
BAT	M9	magenta	Male	Glucose	-0.172329	0.480515
BAT	M9	magenta	Male	NEFA	-0.155691	0.52447
BAT	M9	magenta	Male	Leptin	0.152395	0.533394
BAT	M9	magenta	Male	bw_change	0.193761	0.591706
BAT	M9	magenta	Male	Corticosterone	-0.122435	0.617542
BAT	M9	magenta	Male	IGR	-0.119508	0.636693
BAT	M9	magenta	Male	HOMA_IR	-0.0845487	0.730744
BAT	M9	magenta	Male	%lean_change	0.0846503	0.816149
BAT	M9	magenta	Male	Insulin	0.00181145	0.994688
BAT	M9	magenta	Male	Lactate	-0.00059883	0.998118
BAT	NA	grey	Male	Lactate	-0.497657	0.0355933
BAT	NA	grey	Male	Leptin	0.444603	0.0564884
BAT	NA	grey	Male	Corticosterone	-0.381401	0.107133
BAT	NA	grey	Male	Glycerol	-0.275701	0.253253
BAT	NA	grey	Male	Count_ScWAT	-0.380512	0.27804
BAT	NA	grey	Male	Area_ScWAT	-0.35555	0.313324
BAT	NA	grey	Male	Max_Speed	-0.350248	0.321105
BAT	NA	grey	Male	bw_change	0.311441	0.381047
BAT	NA	grey	Male	%fat_change	0.250032	0.485984
BAT	NA	grey	Male	%lean_change	-0.247364	0.490803
BAT	NA	grey	Male	HOMA_IR	-0.140739	0.5655
BAT	NA	grey	Male	NEFA	-0.125158	0.609681
BAT	NA	grey	Male	Glucose	-0.116362	0.635219
BAT	NA	grey	Male	Glucagon	-0.115225	0.63855
BAT	NA	grey	Male	IGR	0.0771123	0.761032
BAT	NA	grey	Male	Total_ketones	0.0587975	0.811029
BAT	NA	grey	Male	VO2max_change	-0.0345778	0.924451
BAT	NA	grey	Male	Insulin	0.00983206	0.971172
HEART	M1	turquoise	Male	Leptin	-0.677711	0.0001976
HEART	M1	turquoise	Male	%fat_change	-0.796262	0.000382328
HEART	M1	turquoise	Male	Max_Speed	0.735522	0.00177736
HEART	M1	turquoise	Male	Count_ScWAT	0.674521	0.00581136
HEART	M1	turquoise	Male	Lactate	0.465292	0.0219537
HEART	M1	turquoise	Male	VO2max_change	0.563484	0.0287082
HEART	M1	turquoise	Male	Total_ketones	-0.407266	0.0433168
HEART	M1	turquoise	Male	Glucose	-0.305242	0.137876
HEART	M1	turquoise	Male	IGR	-0.279609	0.185752
HEART	M1	turquoise	Male	Glucagon	0.191385	0.359433
HEART	M1	turquoise	Male	HOMA_IR	-0.178614	0.392966
HEART	M1	turquoise	Male	Corticosterone	0.160777	0.44264
HEART	M1	turquoise	Male	Area_ScWAT	-0.212428	0.447198
HEART	M1	turquoise	Male	Insulin	-0.131192	0.560601
HEART	M1	turquoise	Male	bw_change	-0.155854	0.579127
HEART	M1	turquoise	Male	NEFA	-0.0826951	0.694333
HEART	M1	turquoise	Male	%lean_change	0.09179	0.744918
HEART	M1	turquoise	Male	Glycerol	-0.0122523	0.953647
HEART	M2	blue	Male	Glycerol	-0.595963	0.00166833
HEART	M2	blue	Male	Total_ketones	-0.533831	0.00598808
HEART	M2	blue	Male	Max_Speed	0.623426	0.0130215
HEART	M2	blue	Male	%fat_change	-0.610652	0.0156062
HEART	M2	blue	Male	NEFA	-0.45858	0.021133
HEART	M2	blue	Male	Lactate	0.350717	0.0929003
HEART	M2	blue	Male	Count_ScWAT	0.404316	0.134979
HEART	M2	blue	Male	Glucagon	0.304967	0.138249
HEART	M2	blue	Male	Leptin	-0.298197	0.147665
HEART	M2	blue	Male	HOMA_IR	-0.239757	0.248358
HEART	M2	blue	Male	VO2max_change	0.299858	0.277556
HEART	M2	blue	Male	%lean_change	0.24509	0.378633
HEART	M2	blue	Male	IGR	-0.172798	0.41941
HEART	M2	blue	Male	Corticosterone	-0.160287	0.44405
HEART	M2	blue	Male	Area_ScWAT	-0.173519	0.536276
HEART	M2	blue	Male	Insulin	-0.114595	0.611592
HEART	M2	blue	Male	Glucose	-0.0634771	0.763079
HEART	M2	blue	Male	bw_change	-0.0749416	0.790671
HEART	M3	brown	Male	Glycerol	0.656957	0.000360415
HEART	M3	brown	Male	Max_Speed	-0.785205	0.000523788
HEART	M3	brown	Male	%fat_change	0.761863	0.000963515
HEART	M3	brown	Male	Leptin	0.573021	0.00275306
HEART	M3	brown	Male	NEFA	0.565704	0.00320588
HEART	M3	brown	Male	Count_ScWAT	-0.667314	0.00656966
HEART	M3	brown	Male	Total_ketones	0.466277	0.0188027
HEART	M3	brown	Male	VO2max_change	-0.544638	0.0357906
HEART	M3	brown	Male	Area_ScWAT	0.526069	0.043974
HEART	M3	brown	Male	HOMA_IR	0.351406	0.0849786
HEART	M3	brown	Male	%lean_change	-0.411276	0.127756
HEART	M3	brown	Male	bw_change	0.331566	0.227329
HEART	M3	brown	Male	Lactate	-0.240985	0.256637
HEART	M3	brown	Male	Insulin	0.210412	0.347273
HEART	M3	brown	Male	IGR	0.198444	0.352596
HEART	M3	brown	Male	Glucagon	-0.164565	0.431821
HEART	M3	brown	Male	Corticosterone	0.0943805	0.653614
HEART	M3	brown	Male	Glucose	-0.0309249	0.883335
HEART	M4	yellow	Male	Lactate	-0.379377	0.0674914
HEART	M4	yellow	Male	Glycerol	0.315252	0.124782
HEART	M4	yellow	Male	Area_ScWAT	-0.353769	0.195804
HEART	M4	yellow	Male	Total_ketones	0.262312	0.20525
HEART	M4	yellow	Male	Glucagon	-0.256182	0.216426
HEART	M4	yellow	Male	Insulin	-0.197752	0.377694
HEART	M4	yellow	Male	VO2max_change	0.184664	0.509986
HEART	M4	yellow	Male	Glucose	0.137748	0.511424
HEART	M4	yellow	Male	bw_change	0.155038	0.581138
HEART	M4	yellow	Male	Corticosterone	0.110426	0.599253
HEART	M4	yellow	Male	NEFA	0.104355	0.619598
HEART	M4	yellow	Male	%lean_change	-0.137281	0.625633
HEART	M4	yellow	Male	HOMA_IR	-0.093091	0.658063
HEART	M4	yellow	Male	IGR	-0.0696891	0.746261
HEART	M4	yellow	Male	Leptin	0.053811	0.798364
HEART	M4	yellow	Male	Max_Speed	-0.0596708	0.832699
HEART	M4	yellow	Male	%fat_change	0.0293283	0.917364
HEART	M4	yellow	Male	Count_ScWAT	0.0110432	0.968842
HEART	M5	green	Male	Glucose	-0.47935	0.0153274
HEART	M5	green	Male	%lean_change	-0.489848	0.0638088
HEART	M5	green	Male	bw_change	0.483891	0.0676049
HEART	M5	green	Male	Leptin	-0.329011	0.108293
HEART	M5	green	Male	%fat_change	-0.395703	0.144296
HEART	M5	green	Male	Count_ScWAT	0.368053	0.177094
HEART	M5	green	Male	Max_Speed	0.318993	0.24651
HEART	M5	green	Male	Insulin	0.207544	0.354034
HEART	M5	green	Male	NEFA	0.174168	0.405042
HEART	M5	green	Male	IGR	-0.157298	0.462917
HEART	M5	green	Male	VO2max_change	0.173688	0.535874
HEART	M5	green	Male	HOMA_IR	-0.124061	0.554629
HEART	M5	green	Male	Glycerol	0.119261	0.570164
HEART	M5	green	Male	Glucagon	0.0610245	0.771991
HEART	M5	green	Male	Area_ScWAT	0.0448058	0.874019
HEART	M5	green	Male	Lactate	0.0262637	0.903044
HEART	M5	green	Male	Total_ketones	-0.0198258	0.925059
HEART	M5	green	Male	Corticosterone	0.0139372	0.947281
HEART	M6	red	Male	%fat_change	0.84111	8.52285e-05
HEART	M6	red	Male	Max_Speed	-0.748252	0.00133407
HEART	M6	red	Male	Count_ScWAT	-0.696474	0.00391789
HEART	M6	red	Male	VO2max_change	-0.608184	0.0161483
HEART	M6	red	Male	Leptin	0.455992	0.021967
HEART	M6	red	Male	Glycerol	0.42374	0.0347851
HEART	M6	red	Male	Total_ketones	0.419285	0.0369479
HEART	M6	red	Male	NEFA	0.268884	0.193711
HEART	M6	red	Male	Area_ScWAT	0.287776	0.298307
HEART	M6	red	Male	Glucose	0.20364	0.328889
HEART	M6	red	Male	Lactate	-0.164509	0.442392
HEART	M6	red	Male	HOMA_IR	0.156213	0.455866
HEART	M6	red	Male	Corticosterone	0.127722	0.542913
HEART	M6	red	Male	%lean_change	-0.157675	0.574645
HEART	M6	red	Male	Insulin	-0.0668292	0.76762
HEART	M6	red	Male	IGR	0.0594449	0.782612
HEART	M6	red	Male	Glucagon	-0.032874	0.876036
HEART	M6	red	Male	bw_change	0.022181	0.93746
HEART	M7	black	Male	Glycerol	-0.517246	0.00810027
HEART	M7	black	Male	NEFA	-0.407406	0.0432382
HEART	M7	black	Male	Total_ketones	-0.355162	0.0814716
HEART	M7	black	Male	IGR	0.338079	0.106134
HEART	M7	black	Male	Leptin	0.321273	0.117356
HEART	M7	black	Male	Glucagon	-0.288834	0.161427
HEART	M7	black	Male	Glucose	0.252015	0.224252
HEART	M7	black	Male	%fat_change	0.25542	0.358207
HEART	M7	black	Male	Max_Speed	-0.234247	0.400733
HEART	M7	black	Male	Lactate	-0.169549	0.428339
HEART	M7	black	Male	Corticosterone	0.156119	0.456139
HEART	M7	black	Male	Area_ScWAT	-0.165589	0.555336
HEART	M7	black	Male	Count_ScWAT	-0.165461	0.555647
HEART	M7	black	Male	bw_change	-0.164936	0.556921
HEART	M7	black	Male	HOMA_IR	0.114207	0.586729
HEART	M7	black	Male	VO2max_change	-0.104794	0.710131
HEART	M7	black	Male	%lean_change	0.0780433	0.782195
HEART	M7	black	Male	Insulin	0.0316712	0.888728
HEART	M8	pink	Male	Glucose	0.301372	0.143193
HEART	M8	pink	Male	%fat_change	0.347041	0.205042
HEART	M8	pink	Male	Insulin	-0.276539	0.212824
HEART	M8	pink	Male	Total_ketones	0.244191	0.239451
HEART	M8	pink	Male	Count_ScWAT	-0.268553	0.333142
HEART	M8	pink	Male	Max_Speed	-0.249825	0.369192
HEART	M8	pink	Male	Area_ScWAT	-0.2289	0.411876
HEART	M8	pink	Male	Leptin	0.169055	0.419183
HEART	M8	pink	Male	HOMA_IR	-0.140663	0.50244
HEART	M8	pink	Male	IGR	-0.131928	0.538881
HEART	M8	pink	Male	VO2max_change	-0.166084	0.554139
HEART	M8	pink	Male	Lactate	-0.12325	0.566129
HEART	M8	pink	Male	Corticosterone	0.117333	0.576458
HEART	M8	pink	Male	bw_change	-0.155873	0.57908
HEART	M8	pink	Male	NEFA	-0.0780136	0.710888
HEART	M8	pink	Male	Glycerol	0.0760237	0.717964
HEART	M8	pink	Male	Glucagon	0.0678366	0.747309
HEART	M8	pink	Male	%lean_change	0.0626626	0.824428
HEART	M9	magenta	Male	%fat_change	-0.47943	0.070553
HEART	M9	magenta	Male	Total_ketones	-0.336639	0.0998759
HEART	M9	magenta	Male	Glucagon	0.294811	0.152542
HEART	M9	magenta	Male	Max_Speed	0.37947	0.16301
HEART	M9	magenta	Male	Lactate	0.280879	0.183678
HEART	M9	magenta	Male	Leptin	-0.273687	0.185563
HEART	M9	magenta	Male	NEFA	-0.249193	0.229659
HEART	M9	magenta	Male	IGR	-0.232788	0.273661
HEART	M9	magenta	Male	VO2max_change	0.237136	0.394779
HEART	M9	magenta	Male	%lean_change	0.193966	0.48851
HEART	M9	magenta	Male	Area_ScWAT	0.189625	0.498481
HEART	M9	magenta	Male	Glycerol	-0.138032	0.510545
HEART	M9	magenta	Male	Count_ScWAT	0.182238	0.515658
HEART	M9	magenta	Male	Glucose	-0.116396	0.579528
HEART	M9	magenta	Male	bw_change	-0.0886666	0.753345
HEART	M9	magenta	Male	HOMA_IR	-0.0596293	0.777074
HEART	M9	magenta	Male	Corticosterone	0.0318802	0.879756
HEART	M9	magenta	Male	Insulin	-0.000613135	0.997839
HEART	NA	grey	Male	bw_change	-0.340464	0.214337
HEART	NA	grey	Male	NEFA	0.176642	0.398298
HEART	NA	grey	Male	Total_ketones	0.163825	0.433921
HEART	NA	grey	Male	Glucose	0.157527	0.452036
HEART	NA	grey	Male	%lean_change	0.209384	0.453887
HEART	NA	grey	Male	VO2max_change	-0.160414	0.567931
HEART	NA	grey	Male	HOMA_IR	0.091358	0.66406
HEART	NA	grey	Male	%fat_change	0.11892	0.672937
HEART	NA	grey	Male	Glycerol	-0.0824114	0.695333
HEART	NA	grey	Male	IGR	0.0695514	0.746746
HEART	NA	grey	Male	Glucagon	-0.0660384	0.753802
HEART	NA	grey	Male	Max_Speed	-0.0830215	0.768641
HEART	NA	grey	Male	Leptin	0.0550579	0.793789
HEART	NA	grey	Male	Corticosterone	0.0538922	0.798066
HEART	NA	grey	Male	Lactate	-0.0495588	0.818117
HEART	NA	grey	Male	Area_ScWAT	-0.055729	0.84362
HEART	NA	grey	Male	Count_ScWAT	-0.0223573	0.936964
HEART	NA	grey	Male	Insulin	-0.0146998	0.948232
HIPPOC	M1	turquoise	Male	Glycerol	0.504444	0.0119464
HIPPOC	M1	turquoise	Male	NEFA	0.385495	0.0628342
HIPPOC	M1	turquoise	Male	Glucose	-0.346429	0.0972452
HIPPOC	M1	turquoise	Male	IGR	0.318287	0.138837
HIPPOC	M1	turquoise	Male	Glucagon	-0.254627	0.229854
HIPPOC	M1	turquoise	Male	Lactate	0.232422	0.285883
HIPPOC	M1	turquoise	Male	%lean_change	-0.239285	0.39038
HIPPOC	M1	turquoise	Male	%fat_change	0.212385	0.447292
HIPPOC	M1	turquoise	Male	Leptin	0.155068	0.469365
HIPPOC	M1	turquoise	Male	Max_Speed	-0.193465	0.489656
HIPPOC	M1	turquoise	Male	bw_change	-0.191942	0.493148
HIPPOC	M1	turquoise	Male	Total_ketones	0.131943	0.538835
HIPPOC	M1	turquoise	Male	VO2max_change	-0.120496	0.668827
HIPPOC	M1	turquoise	Male	Count_ScWAT	-0.111247	0.693059
HIPPOC	M1	turquoise	Male	Area_ScWAT	0.100067	0.722719
HIPPOC	M1	turquoise	Male	HOMA_IR	0.071575	0.739623
HIPPOC	M1	turquoise	Male	Insulin	-0.041942	0.85675
HIPPOC	M1	turquoise	Male	Corticosterone	0.00976064	0.963896
[truncated: 1,242 more rows]

## Sheet: S4 - Method1
Untargeted lipidomics LC-MS gradient program
Time (min)	%A	%B	Flow (ml/min)	Curve
0	80	20	0.4	5
1	40	60	0.4	6
5	30	70	0.4	6
8	10	90	0.4	6
8.2	0	100	0.4	6
10.5	0	100	0.4	6
10.7	80	20	0.4	6
12	80	20	0.4	6

## Sheet: S5 - Method2
Untargeted lipidomics ISTD selection
Lipid class	ISTD used
Fatty acyls (fatty acids, fatty amides, fatty amines, and acyl carnitines)	PC
DAG	DAG
TAG	TAG
Glycerophospholipids (PA, PC, PE, PG, PI, PS, lysophospholipids, all plasmalogens), MGDG	PC
Sphingolipids	SM
Sterols, sterol esters	CE
Nucleic acids, organic acids (mostly amino acids), carnitine, phenolic lipids, bilirubin, ubiquinones, bile acids, steroid conjugates, steroid	Only a few species detected (n=79 all tissues combined). ISTD standardization not performed.

## Sheet: S6 - Method3
Targeted lipidomics LC-MS gradient program
Time (min)	%A	%B	Flow (ml/min)
0	90	10	0.5
0.5	90	10	0.5
1	50	50	0.5
2	50	50	0.5
2.1	25	75	0.5
5	25	75	0.5
7	15	85	0.5
12	15	85	0.5
12.1	90	10	0.5
18	90	10	0.5

## Sheet: S7 - Method4
Targeted lipidomics transition list
Negative Mode transition				Positive Mode transition
analyte	parent m/z	product /mz		analyte	parent m/z	product /mz
9,10 DIHOME	313.2	201.0		PGE2 Ethanolamide (PGE2-EA)_271.3	396.5	271.3
PGE E2	351.2	315.1		PGE2 Ethanolamide (PGE2-EA)_358.3	396.5	358.3
20- HETE	319.2	289.2		PGE2 Ethanolamide (PGE2-EA)_376.3	396.5	376.3
9-HETE	319.2	167.2		Oleoyl Ethanolamide (OEA)	326.4	62.1
14,15 DHET	337.2	207.0		Palmitoyl Ethanolamide	300.4	62.1
5 HETE	319.2	115.1		ARA-Ethanolamide (AEA)	348.4	62.1
12 R-HETE	319.2	179.1		Docosahexaenoyl Ethanolamide (DHEA)	372.4	62.1
11,12-DHET	337.2	167.1		Linoleoyl Ethanolamide (LEA)	324.4	62.1
8,9-DHET	337.2	127.2		Stearoyl Ethanolamide (ceramid)	328.4	62.1
5,6 EET	319.2	191.1		oxy-Arachidonoyl Ethanolamide (oxy-AEA)	364	76
5,6-DHET	337.2	71.0		2-Arachidonoyl Glycerol (2AG) trans1	379.4	135
TXB2	369.2	169.1		2-Arachidonoyl Glycerol (2AG) trans2	379.4	161
PGF2A	353.2	193.3		Docosatetraenoyl Ethanolamide (DEA)	376.59	62.1
14(15)-EET / 15-HETE	319.2	219.0		Alpha-Linolenoyl Ethanolamide (ALEA)	322.4	62.1
LTB4	335.2	195.1		Oleamide	282.5	247.4
8(9)-EET	319.2	69.2		Dihomo-Gamma-Linolenoyl Ethanolamide	350.4	62.1
11(12)-EET	319.2	167.1		Docosanoyl Ethanolamide	384.5	62.1
Resolvin D1	375.3	215.1
Resolvin D2	375.3	215.2
Resolvin D3	375.3	147.1
Resolvin E1	349	109
Resolvin E1	349	161
12(13)-EpOME	295.2	195.1
13 HODE	295.2	195.1
13-OxoODE (13-KODE)	293.2	113.1
13(S)-HpODE	311.2	113.1
13(S)HOTrE	293.2	195.1
9(S)-HODE	295.2	277.6
9(S)-HODE	295.2	171.3
9(S)-HpODE	311.2	201
9(S)-HpODE	311.2	185.1
9(S)HOTrE	293.2	185.1
9(S)HOTrE	293.2	171.1
8-iso Progstaglandin F2α	353.2	255
8-iso Progstaglandin F2α	353.2	219.2
8-iso Progstaglandin F2α	353.2	193.1

## Sheet: S8 - Method5
WGCNA algorithm arguments
Tissue	Softpower	R.sq	Mean.k	minModuleSize	No. lipids
LIVER	18	0.89	1.5	25	690
HEART	9	0.89	3.98	16	640
LUNG	16	0.898	4.21	20	782
SKM-GN	5	0.907	17	15	534
WAT-SC	10	0.886	5.36	14	559
PLASMA	12	0.88	15.9	10	649
BAT	5	0.929	15.4	20	688
HIPPOC	10	0.888	1.97	30	657
KIDNEY	5	0.935	17	20	772
