# Supplementary material for: Endurance Exercise Training Alters Lipidomic Profiles of Plasma and Eight Tissues in Rats: a MoTrPAC study
Source: Research Square preprint supplement (doi:10.21203/rs.3.rs-5263273/v1), 2024-11-21
Supplement: Supplementary file 1 [file 957922337f5906c4da495670.pdf]

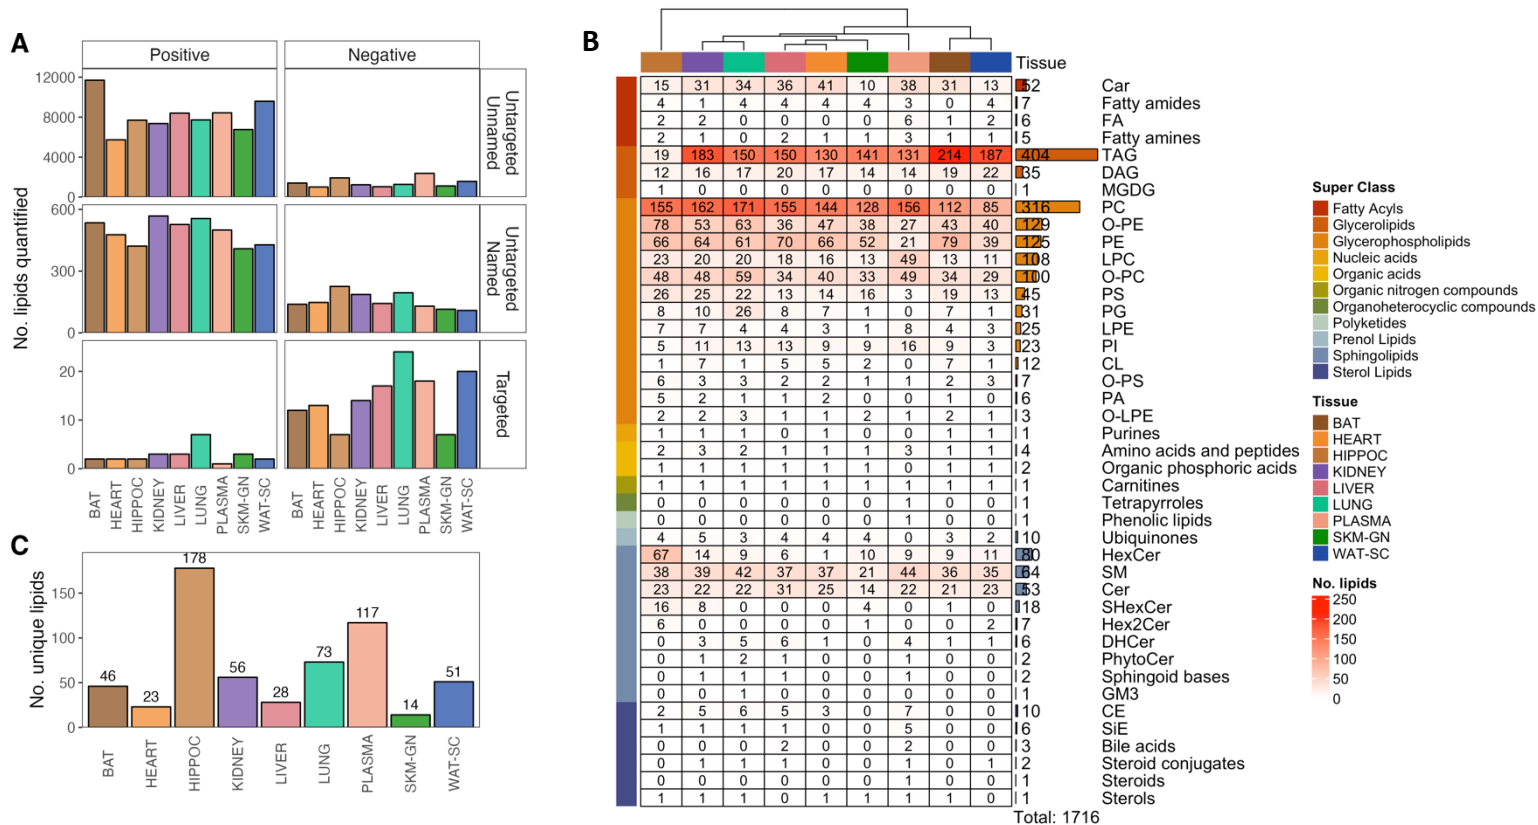

Total: 1716

**Fig S1. Lipidomics profiling of eight tissues and plasma**

- (A) Number of detected lipid features, including named and unnamed features.
- (B) Number of annotated lipid features in each tissue, separated by lipid classes.
- (C) Number of lipids that were unique (i.e., detected only once) within each tissue.
- (D) Tissue lipid class abundance. Mean lipid class concentrations were calculated based on mean of male/female group medians and were reported as percentages of total lipids (sum of all lipids). Lipid classes <1% were summed and shown as 'Others'.

**A**

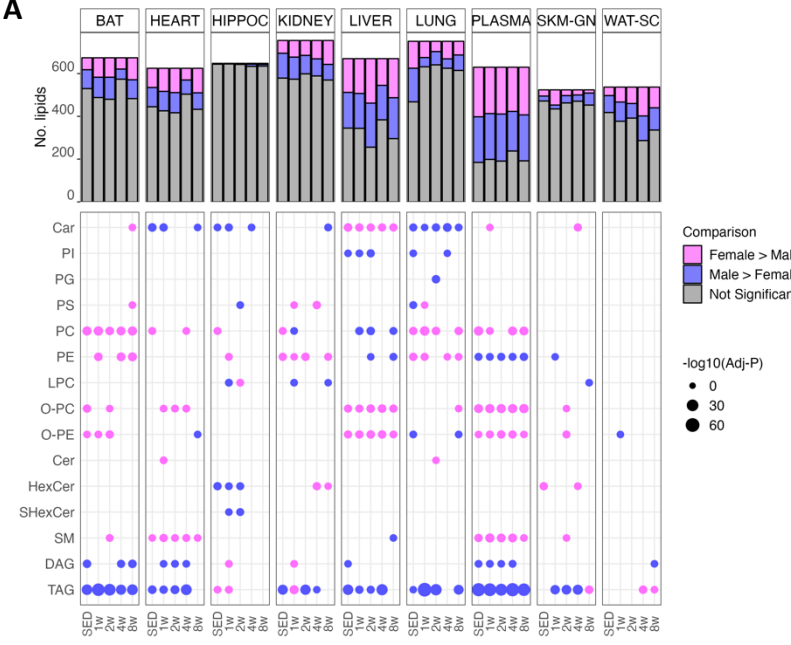

**B**

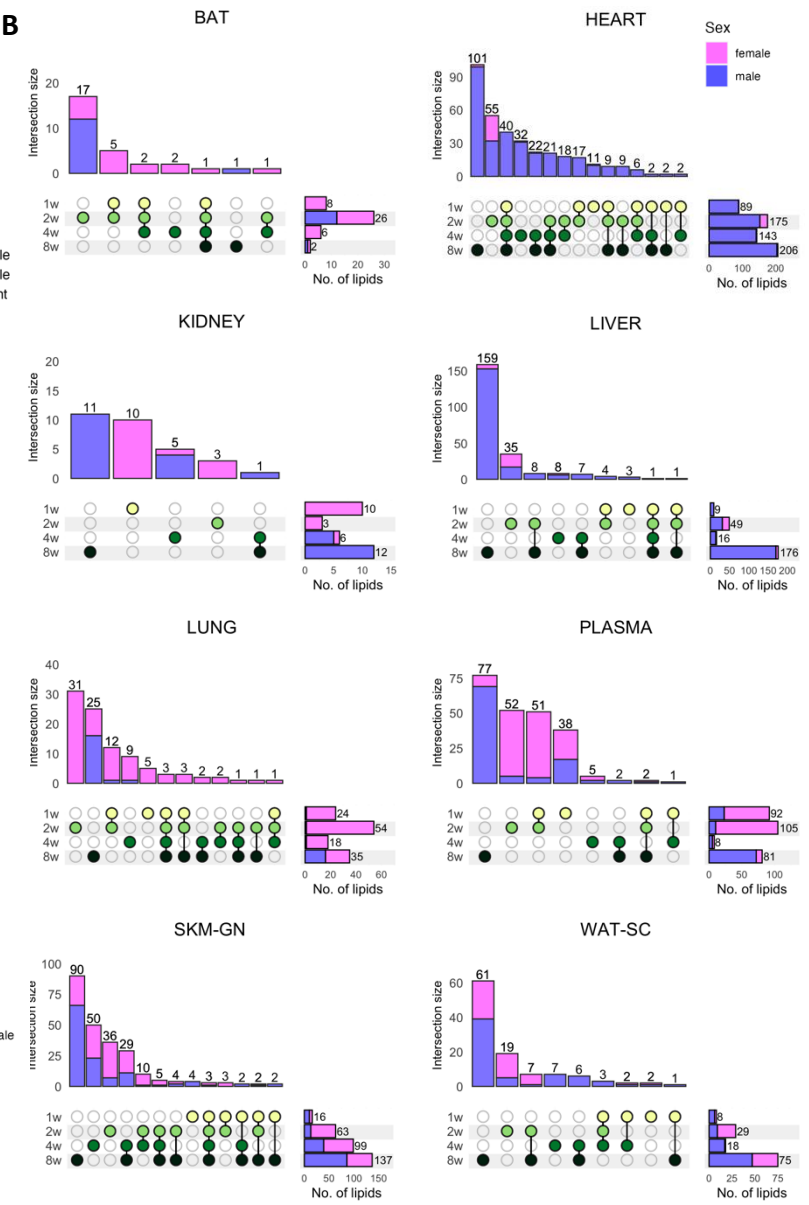

**C**

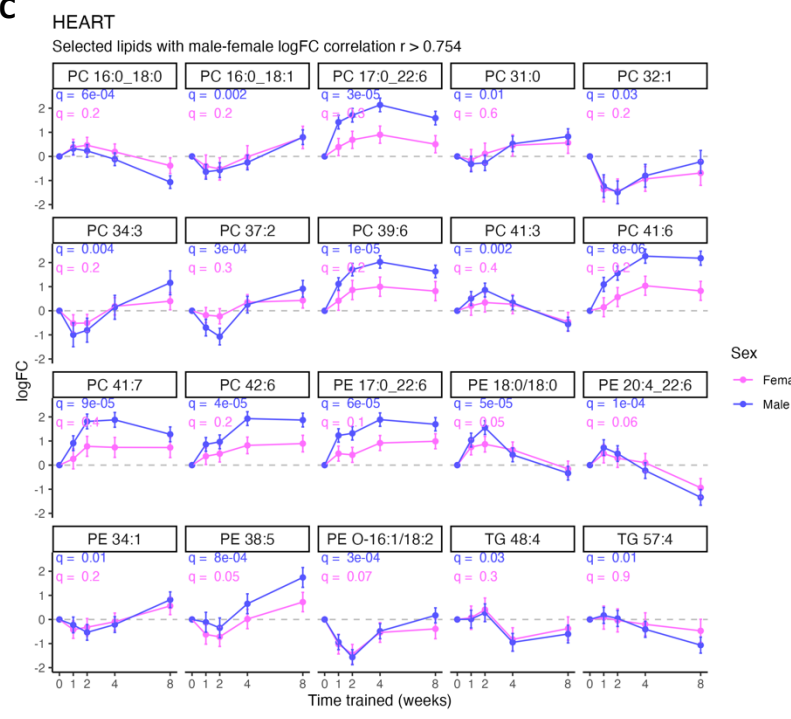

**Fig S2. Sex-specific temporal *ExT* responses in lipidomes**

- (A) Number of lipids and enrichment plot of lipid classes that were significantly different between sexes at each timepoint ( $\text{FDR} < 0.05$ ). Color and dot size indicate sex comparison and enrichment significance, respectively.
- (B) UpSet plots of the number of significant lipids from each training timepoint relative to sex-matched sedentary control ( $\text{FDR} < 0.05$ ).
- (C) Trajectory plots of logFC of top 20 lipids that were significantly correlated between male vs female logFC ( $r > 0.754$ ) but showed significant training response only in male heart in Fig 1E. Color indicates sex. Number indicates training differential abundance FDR.

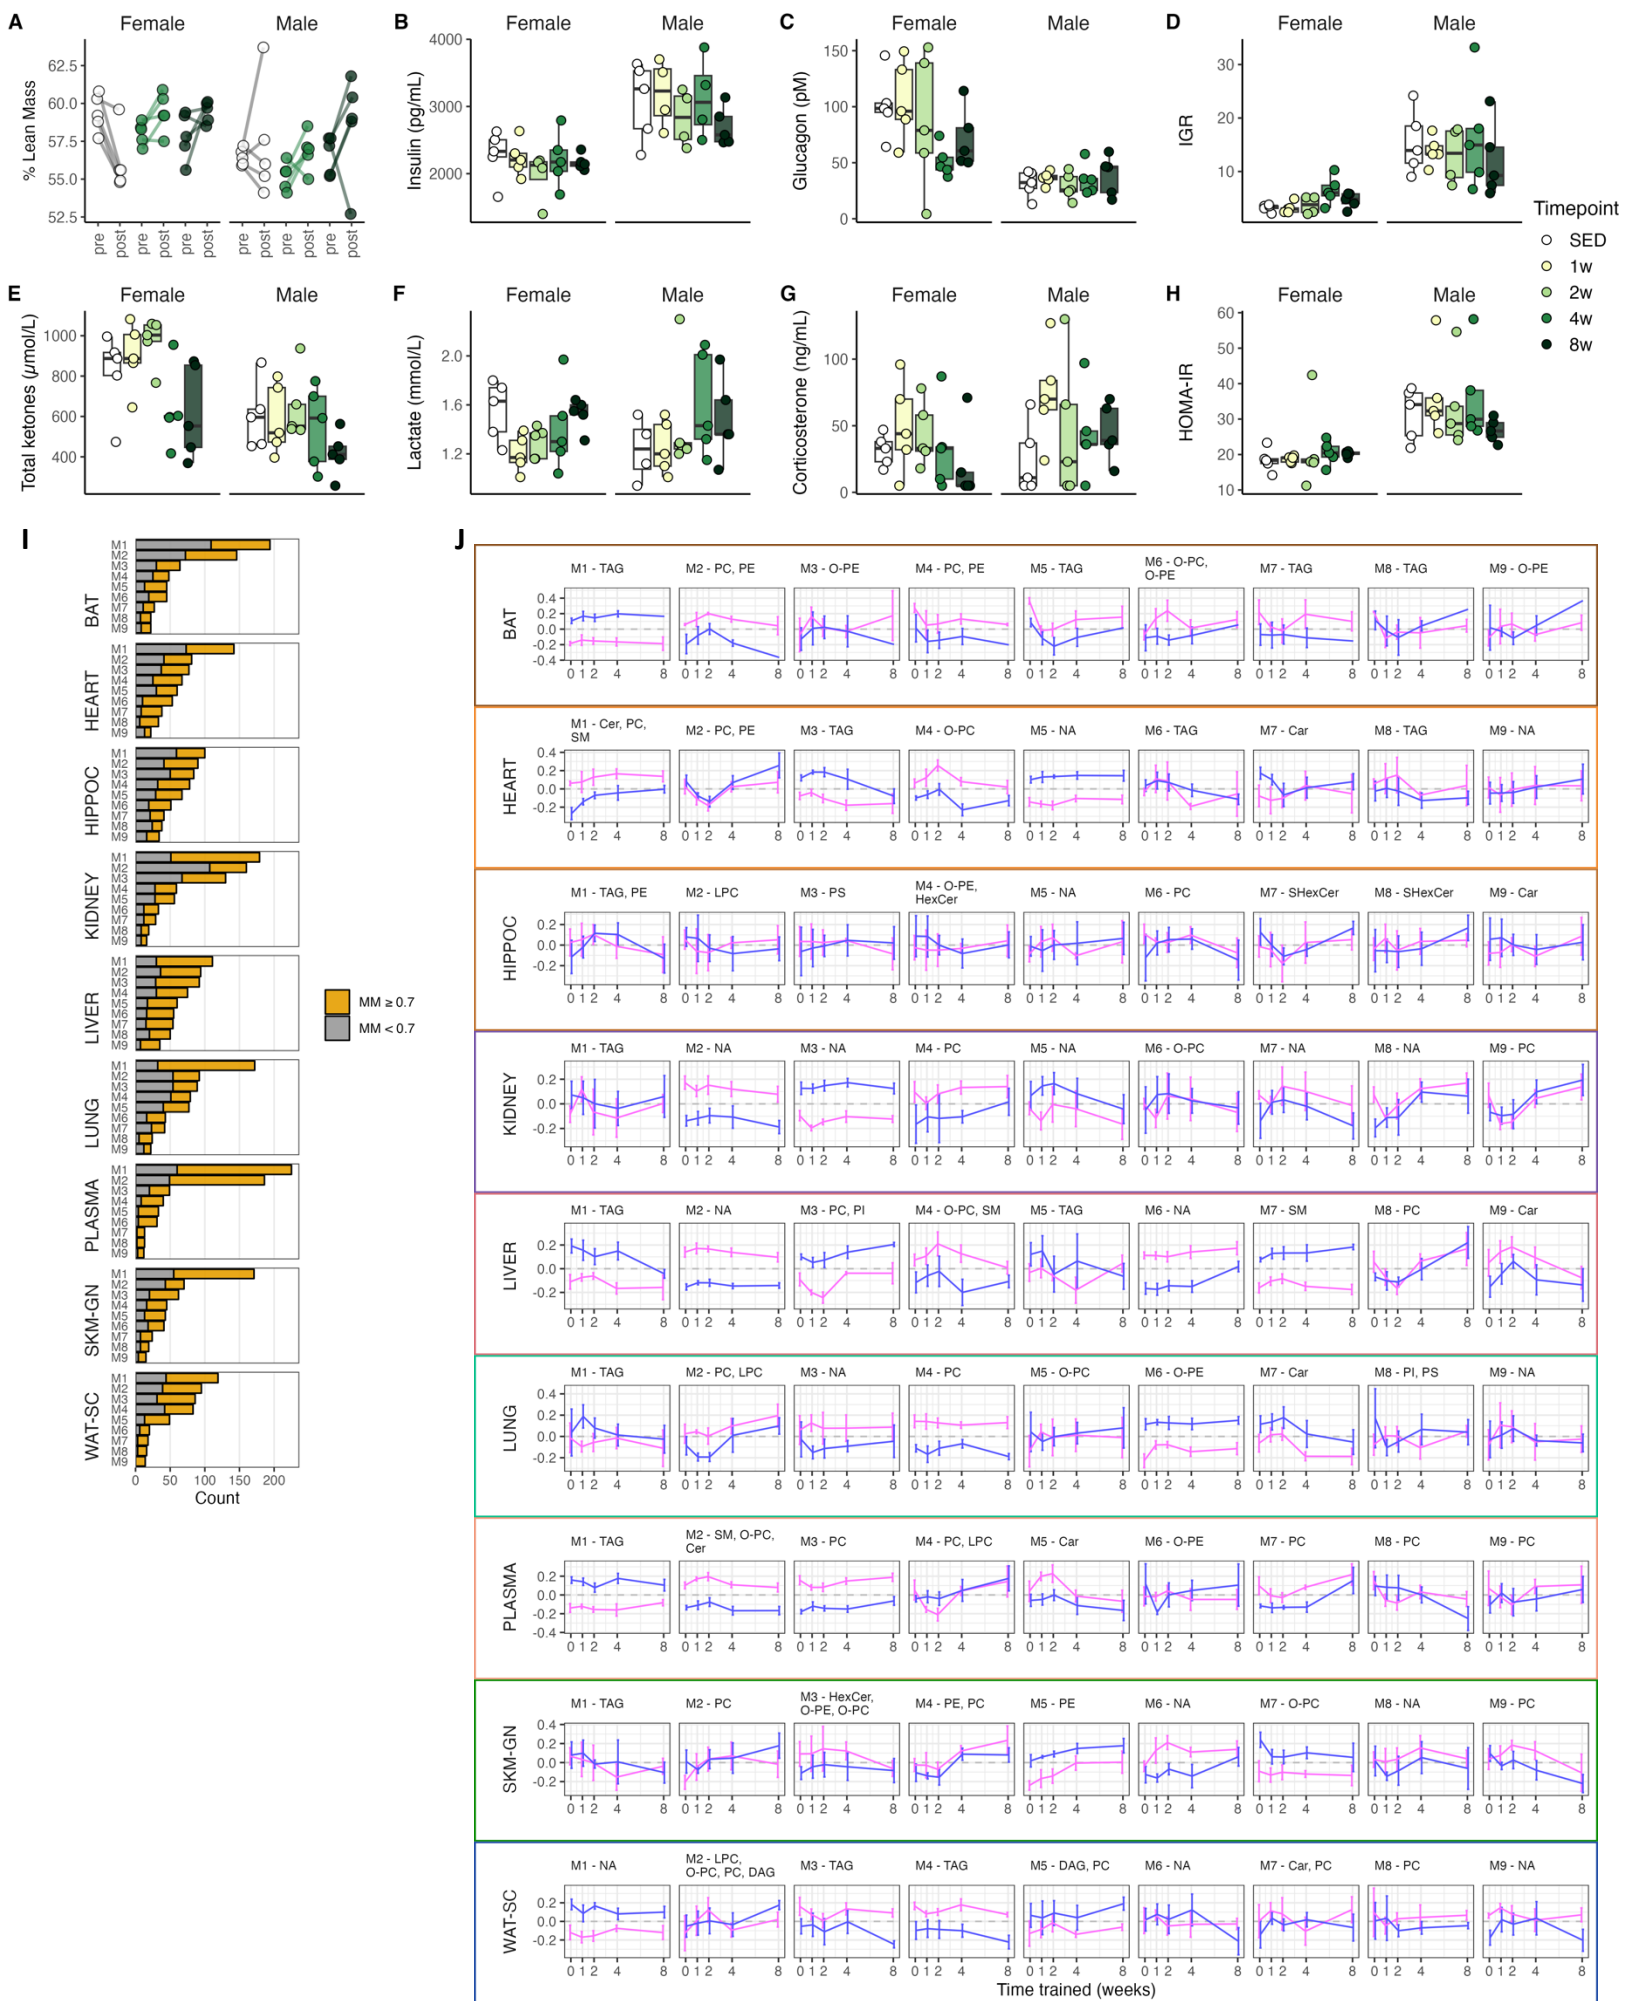

### **Figure S3. Integrative phenotypic-lipidomic responses to ExT**

- (A-H) Measurements of selected phenotypic traits: (A) %lean mass, circulating plasma levels of (B) insulin, (C) glucagon, (D) insulin:glucagon ratio (IGR), (E) total ketones, (F) lactate, (G) corticosterone, (H) HOMA-IR.
- (I) Number of total and hub lipids (membership  $\geq 0.7$ ) in each tissue module.
- (J) Plots of the module eigenvalues (MEs) from each tissue module.

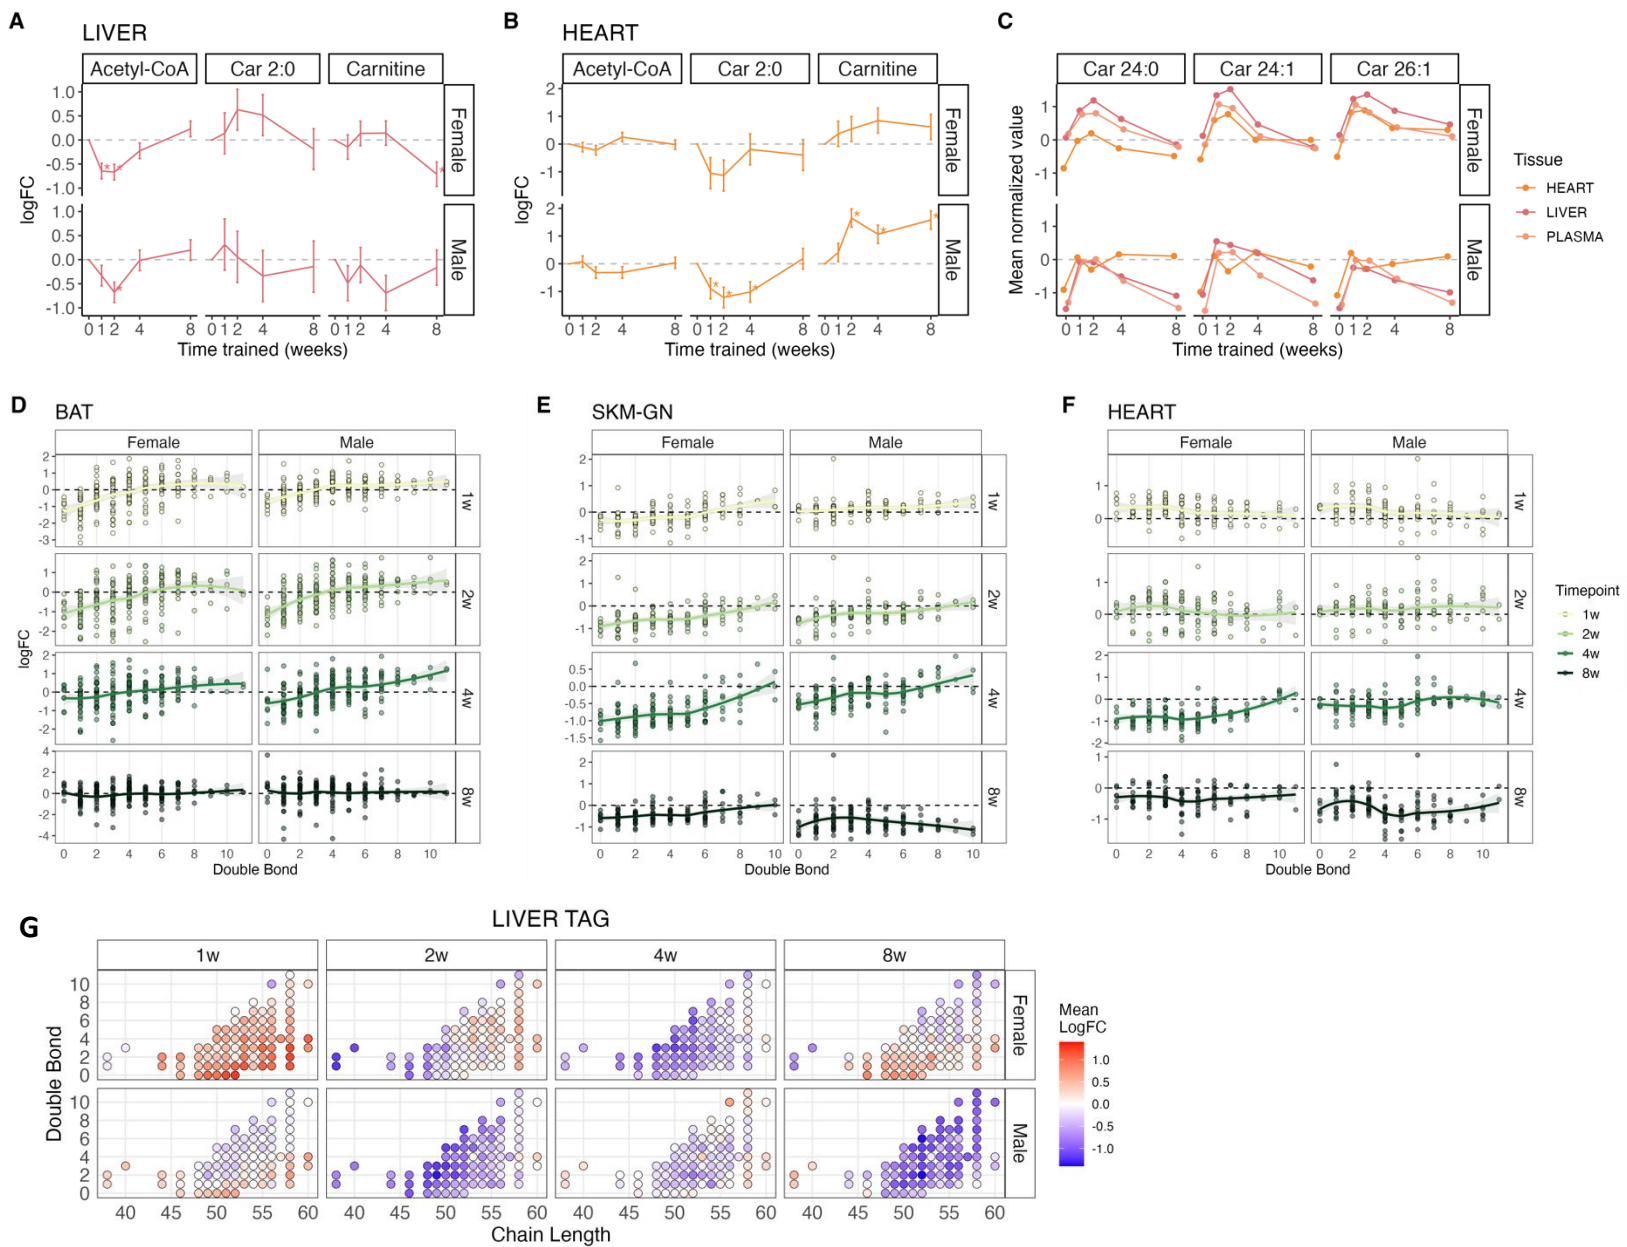

**Figure S4. ExT effects on lipids in energy metabolism**

- (A-B) Trajectory plots of logFC of acetylcarnitine, free carnitine, and acetyl-CoA in (A) liver and (B) heart.
- (C) Trajectory plots of standardized abundances of very-long-chain acylcarnitines in heart, liver, and plasma.
- (D-F) Timewise logFC *versus* the number of double bonds of TAG in (D) BAT, (E) SKM-GN, (F) heart.
- (G) Liver TAG logFC. Row and column indicate numbers of total carbon and double bond respectively. Color indicates mean logFC (when there were multiple TAG species with the same acyl composition).



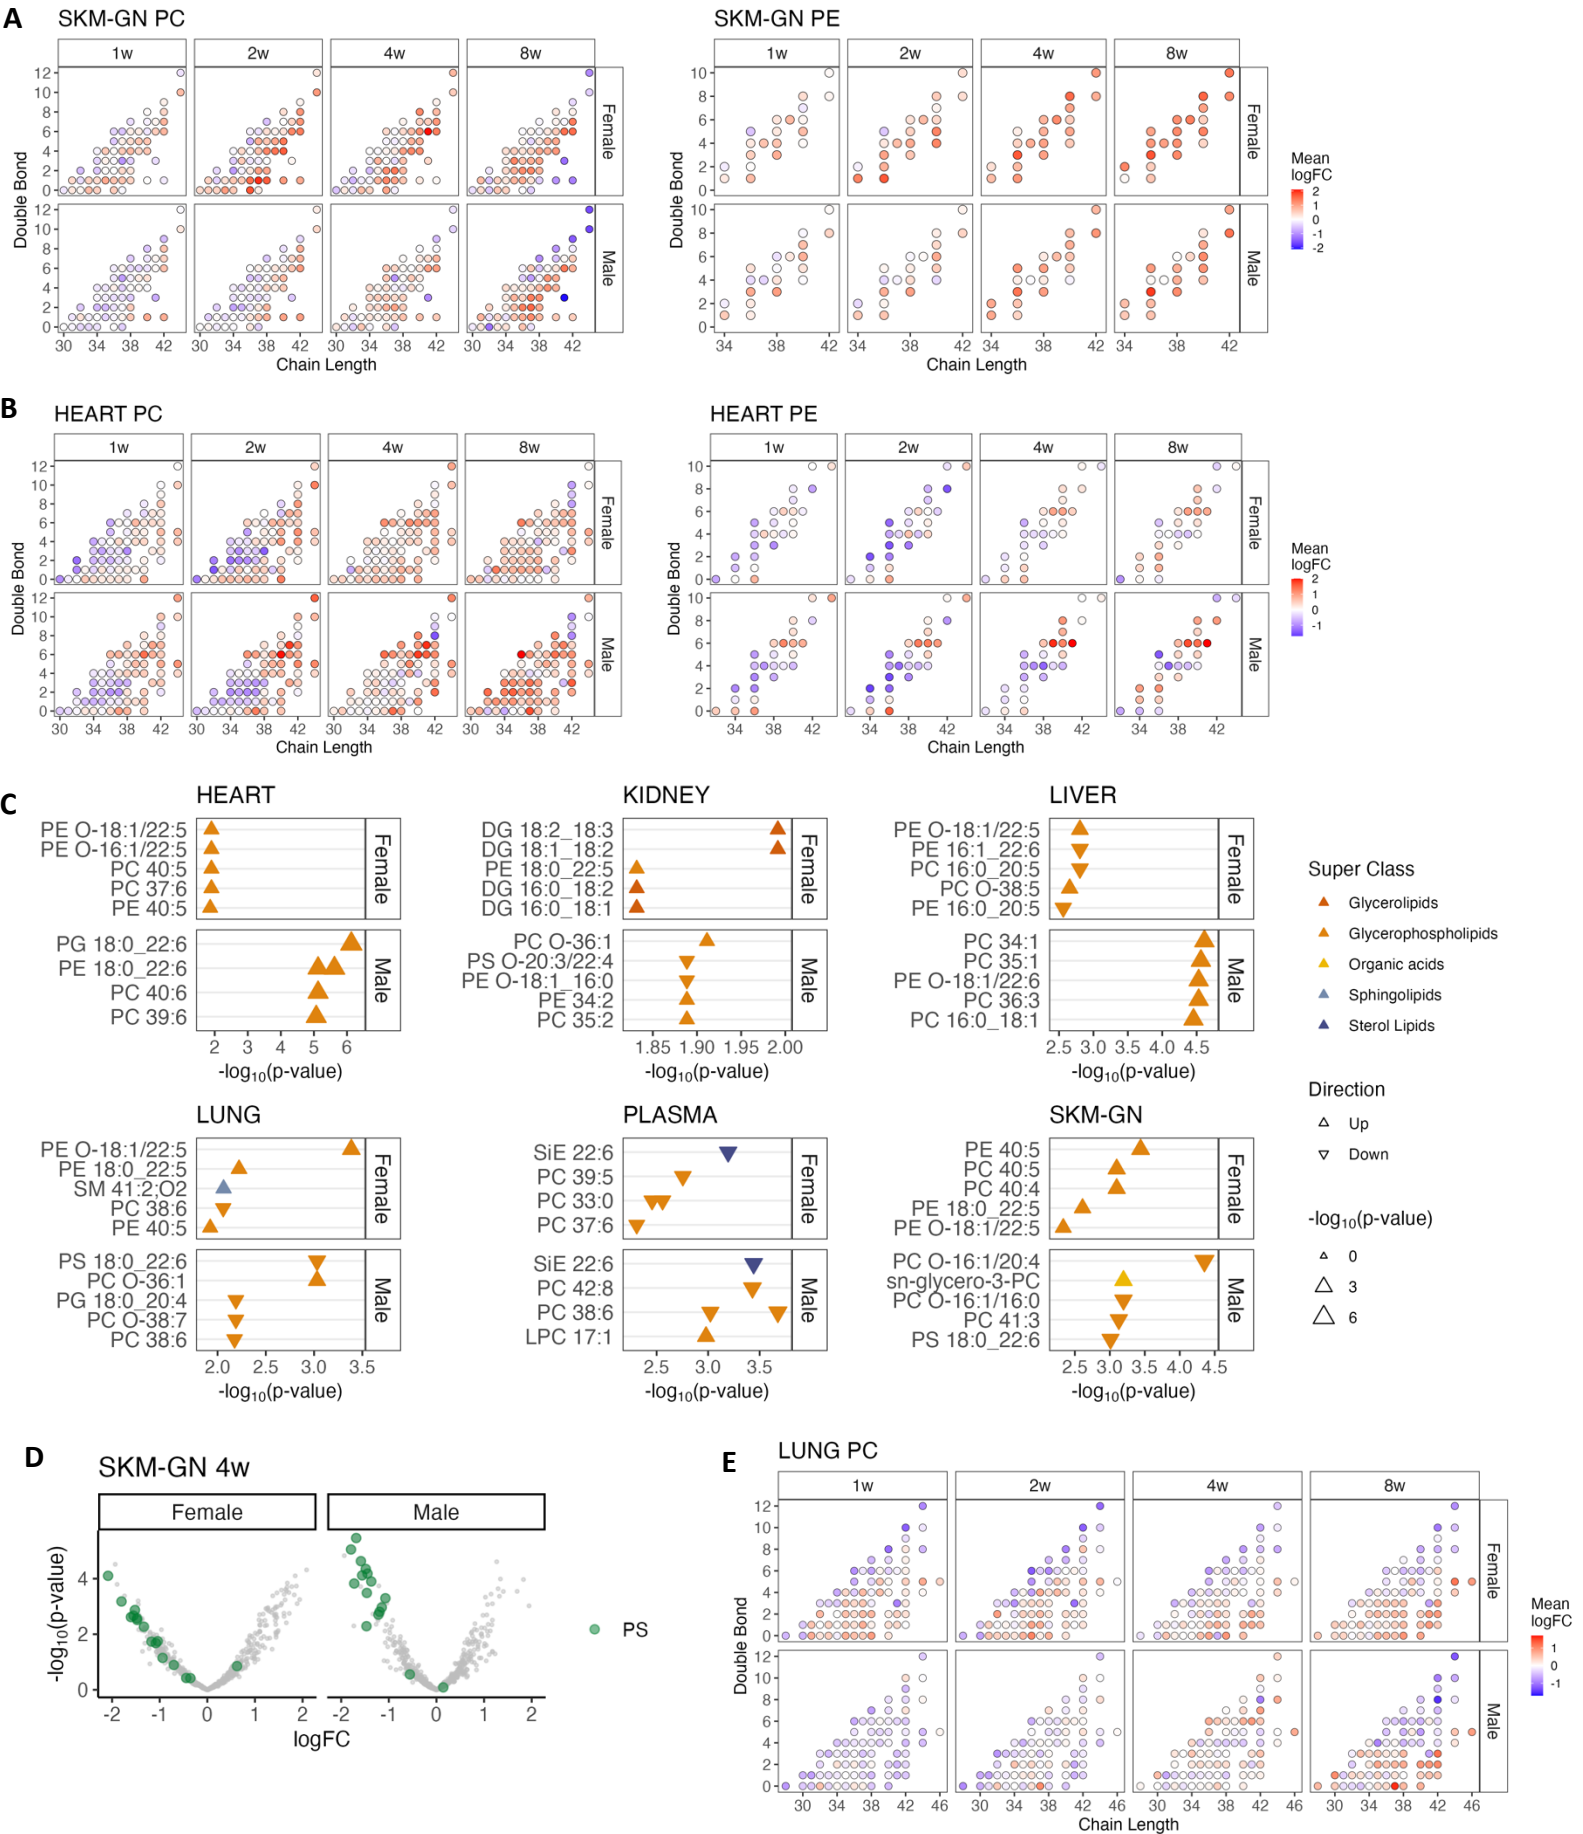

### **Figure S5. ExT effects on phospholipids**

- (A) SKM-GN PC and PE logFC. Row and column indicate numbers of total carbon and double bond respectively. Color indicates mean logFC (when there were multiple PC species with the same total acyl chain; red, positive; blue, negative).
- (B) Heart PC and PE logFC.
- (C) Top 5 lipids that responded to exercise ranked by p-values, with all timepoints combined. Direction of the triangle indicates the direction of change, and color indicates lipid super class.
- (D) Volcano plots displaying comparisons of trained animals against sex-matched sedentary controls in SKM-GN at 4w. Colors highlight PS (grey: all other lipids).
- (E) Lung PC logFC.

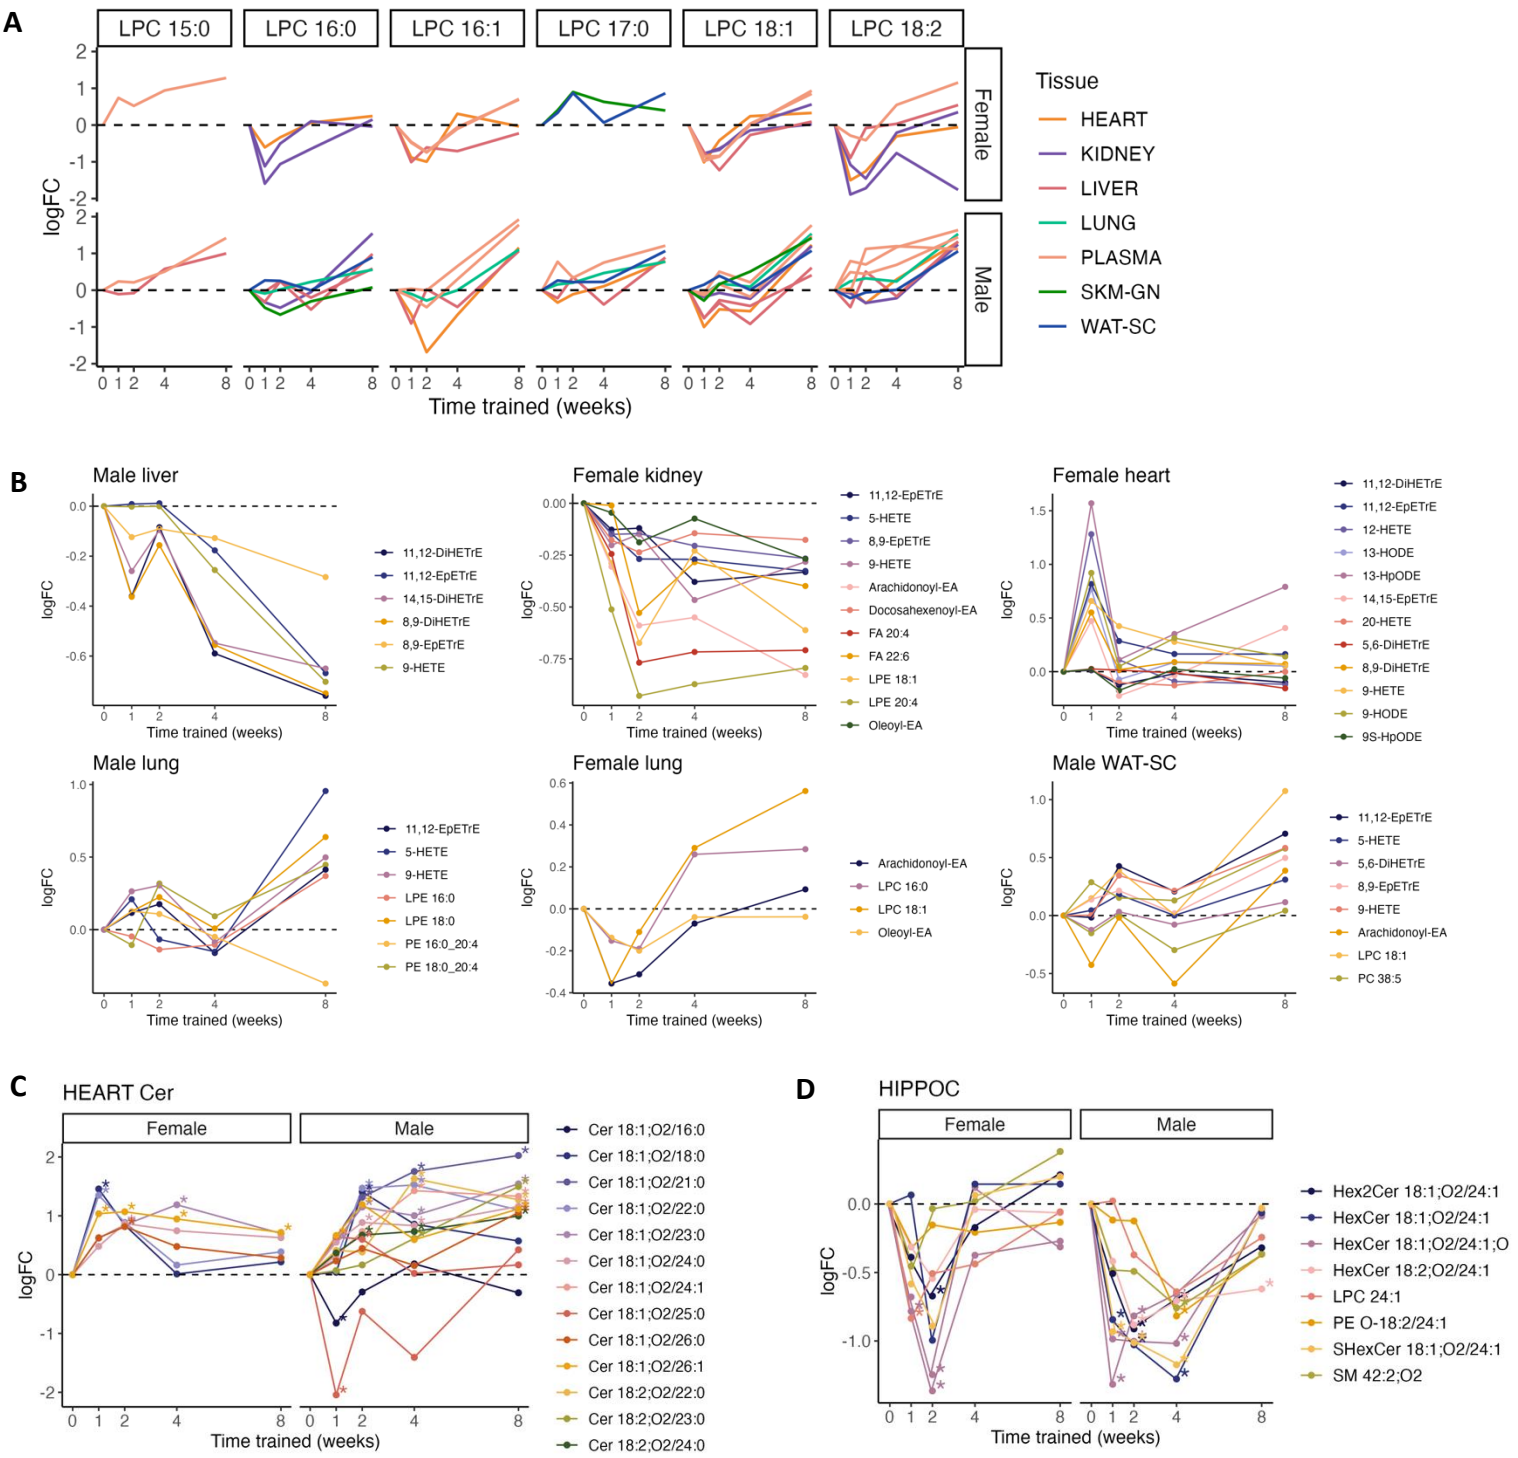

**Figure S6. ExT effects on *lipid mediators and sphingolipids***

- (A) Trajectory plots of logFC of selected LPC species in tissues. Colors indicate tissue.
- (B) Trajectory plots of selected oxylipins, lysophospholipids, fatty acid ethanolamides, and PC, PE species.
- (C) Trajectory plots of logFC of selected heart ceramides that were significantly different compared to sedentary control in each sex (\* indicates  $p < 0.05$ ).
- (D) Trajectory plots of logFC of 24:1-containing lipids in the HIPPOC.

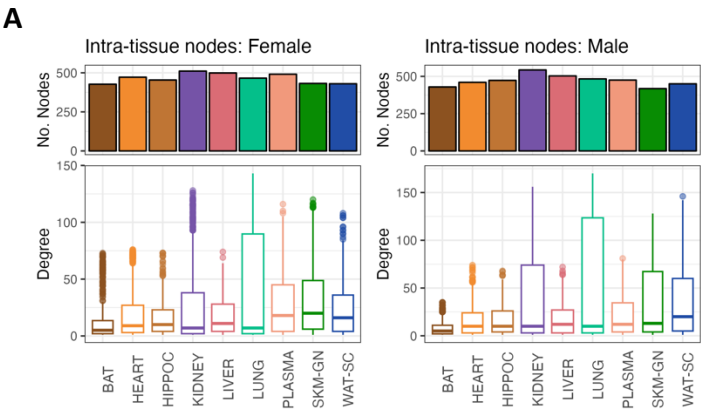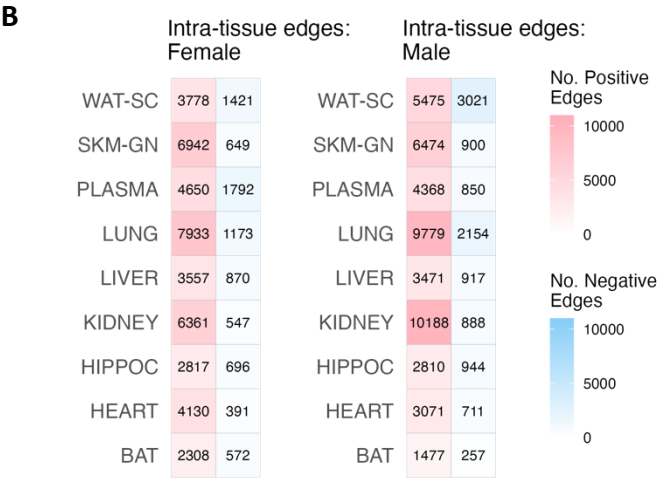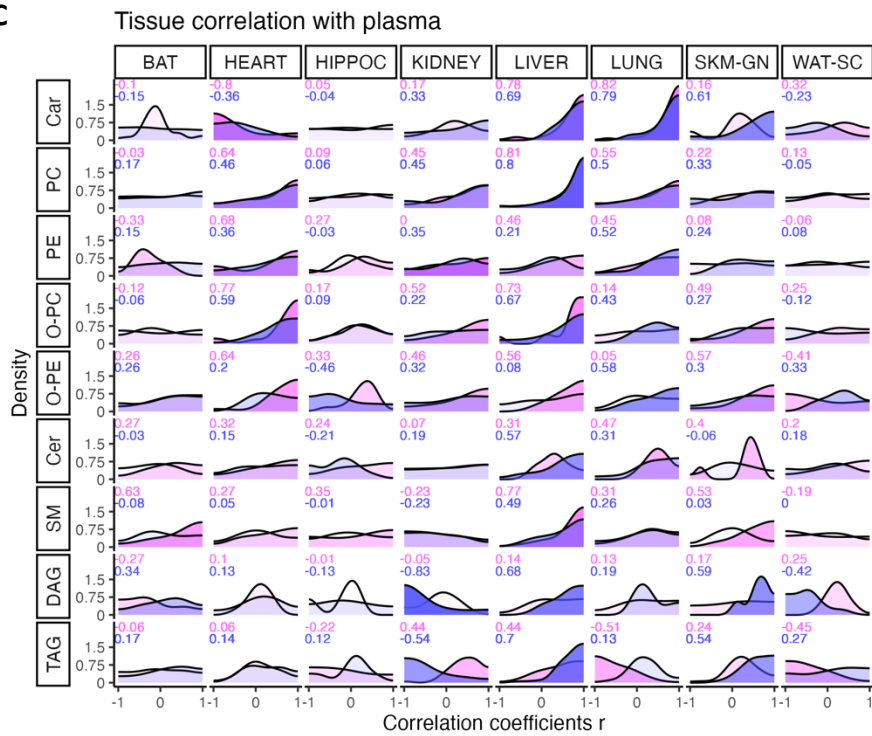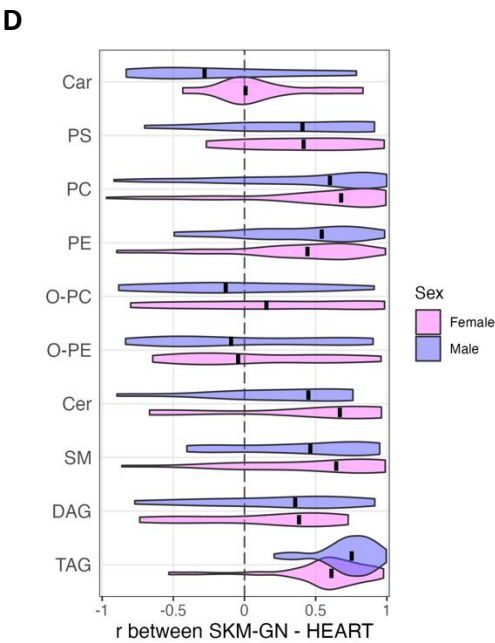

**Figure S7. Tissue connectivity and networking during ExT**

- (A) Number of nodes associated with each tissue in intra-tissue correlations. Boxplot of node degree (number of edges per node) of each lipid within a tissue. Box width is proportional to the number of nodes within each tissue.
- (B) Number of intra-tissue edges. Color indicates correlation coefficient sign (red, positive; blue, negative), and the number and transparency level indicate the number of edges.
- (C) Density plot of correlation coefficients between lipid timewise logFC, shown by lipid class. Correlations were performed using logFC trajectory of the same lipid between plasma and each tissue for each sex. Color indicates sex, and the number and transparency level indicate the median correlation coefficients.
- (D) Violin plot of correlation coefficients of lipid timewise logFC between SKM-GN and heart, shown by lipid class. Color indicates sex. Black vertical bars indicate median correlation coefficients.
